# Supplementary material
Source: MDPI journal article supplement (https://www.mdpi.com/2073-8994/16/4/477)
Supplement: s1 [file s1]

Archive with 3 entries (3 files):
- ECR-1_checkcif.pdf
- ECR-1_tomo14_dyn_final_SI_revised.cif
- Symmetry_ECR1_3D_ED_SM.pdf
