# Supplementary material
Source: MDPI journal article supplement (https://www.mdpi.com/2073-8994/16/4/477)
Supplement: s1 [file s1 › ECR-1_tomo14_dyn_final_SI_revised.cif]

#=======================================================================
data_global

_publ_section_related_literature ?

_audit_update_record
;
2024-01-29 # Formatted by publCIF

;
_publcif_datablock.id '{110114fe-36bc-4f17-9481-d9175424f556}'

# publcif _publ_body_element loop start
loop_
_publ_body_element
_publ_body_title
_publ_body_contents

 section 
;
Introduction
; 
;

;
 section 
;
Experimental
; 
;

;
 subsection 
;
Synthesis and crystallization
; 
;

;
 subsection 
;
Refinement
;
;
Crystal data, data collection and structure refinement details are summarized
in Table 1.
;

 section 
;
Results and discussion
; 
;

;
# publcif _publ_body_element loop end
#=======================================================================

_audit_creation_method                   'Jana2020 1.3.52'


# 1. PROCESSING SUMMARY (IUCr Office Use Only)

_journal_date_recd_electronic            ?
_journal_date_to_coeditor                ?
_journal_date_from_coeditor              ?
_journal_date_accepted                   ?
_journal_date_printers_first             ?
_journal_date_printers_final             ?
_journal_date_proofs_out                 ?
_journal_date_proofs_in                  ?
_journal_coeditor_name                   ?
_journal_coeditor_code                   ?
_journal_coeditor_notes
?
_journal_techeditor_code                 ?
_journal_paper_category                  ?
_journal_techeditor_notes
?
_journal_coden_ASTM                      ?
_journal_name_full                       'Acta Crystallographica Section C'
_journal_year                            ?
_journal_volume                          ?
_journal_issue                           ?
_journal_page_first                      ?
_journal_page_last                       ?
_journal_suppl_publ_number               ?
_journal_suppl_publ_pages                ?

#=======================================================================

# 2. SUBMISSION DETAILS

_publ_contact_author_name                'Jean-Louis Paillaud'
_publ_contact_author_address

;
Equipe Materiaux a Porosite Controlee (MPC)
Institut de Science des Materiaux de Mulhouse (IS2M)
UMR CNRS 7361 UHA, ENSCMu
3b rue Alfred Werner
68093 Mulhouse Cedex
France
;

_publ_contact_author_email               ?
_publ_contact_author_fax                 ?
_publ_contact_author_phone               ?

_publ_requested_journal                  
'Acta Crystallographica Section C'
_publ_requested_category                 ?

_publ_contact_letter
;
Please consider this CIF for publication. I certify that this contibution is the
original work of those listed as authors; that it has not been published
before (in any language or medium) and is not being considered for publication
elsewhere; that all authors concur with and are aware of the submission; that
all workers involved in the study are listed as authors or given proper credit
in the acknowledgements; that I have obtained permission for and acknowledged
the source of any excerpts from other copyright works; and that to the best of
my knowledge the paper contains no statements which are libellous, unlawful or
in any way actionable. All coauthors have made significant scientific
contributions to the work reported, including the ideas and their execution,
and share responsibility and accountability for the results.
;


#=======================================================================

# 3. TITLE AND AUTHOR LIST

_publ_section_title
;
ECR-1 (3D ED)
;

_publ_section_title_footnote
.
loop_
_publ_author_name
_publ_author_address
_publ_author_footnote
_publ_author_email
'Paillaud, Jean-Louis'
;
Equipe Materiaux a Porosite Controlee (MPC)
Institut de Science des Materiaux de Mulhouse (IS2M)
UMR CNRS 7361 UHA, ENSCMu
3b rue Alfred Werner
68093 Mulhouse Cedex
France
;
;
? # footnote
;
;
?
;


#=======================================================================

# 4. TEXT

_publ_section_synopsis
.
_publ_section_abstract
;
(type here to add)
;

_publ_section_introduction
?
_publ_section_experimental
?
_publ_section_exptl_prep
;

;

_publ_section_exptl_refinement
;

;

_publ_section_exptl_solution
?
_publ_section_discussion
?
_publ_section_acknowledgements
;
(type here to add)
;

_publ_section_references
;
(type here to add)
;
_publ_section_figure_captions
;

;

_publ_section_table_legends
?

#=======================================================================
data_I
_publcif_datablock.id '{d42f901b-72a3-4363-ad01-e0162464385e}'

#=======================================================================

# 5. CHEMICAL DATA

_chemical_name_systematic
?
_chemical_name_common                    ?
_chemical_formula_moiety                 ?
_chemical_formula_structural             ?
_chemical_formula_analytical             ?
_chemical_formula_iupac                  ?
_chemical_formula_sum                    'Na8.154744 O124.8117 Si60'
_chemical_formula_weight                 3869.5
_chemical_melting_point                  ?
_chemical_compound_source                ?
_chemical_absolute_configuration         .

#=======================================================================

# 6. CRYSTAL DATA

_symmetry_cell_setting                   orthorhombic
_symmetry_space_group_name_H-M           'P m m n'
_symmetry_space_group_name_Hall          '-P -2xa;-2yb;-2zab'
_symmetry_Int_Tables_number              59

loop_
 _space_group_symop_id
 _space_group_symop_operation_xyz
 1   x,y,z
 2   -x+1/2,-y+1/2,z
 3   -x,y+1/2,-z
 4   x+1/2,-y,-z
 5   -x,-y,-z
 6   x+1/2,y+1/2,-z
 7   x,-y+1/2,z
 8   -x+1/2,y,z

_cell_length_a                           7.4865
_cell_length_b                           17.8463
_cell_length_c                           25.6545
_cell_angle_alpha                        90
_cell_angle_beta                         90
_cell_angle_gamma                        90
_cell_volume                             3427.603

loop_
 _twin_individual_id
 _twin_individual_mass_fraction_refined
 _twin_individual_twin_matrix_11
 _twin_individual_twin_matrix_12
 _twin_individual_twin_matrix_13
 _twin_individual_twin_matrix_21
 _twin_individual_twin_matrix_22
 _twin_individual_twin_matrix_23
 _twin_individual_twin_matrix_31
 _twin_individual_twin_matrix_32
 _twin_individual_twin_matrix_33
 ? ? ? ? ? ? ? ? ? ? ?

_cell_formula_units_Z                    1

_cell_measurement_reflns_used            677
_cell_measurement_theta_min              0.05
_cell_measurement_theta_max              1.01
_cell_measurement_temperature            103
_cell_special_details
?

_exptl_crystal_density_diffrn            1.8746
_exptl_crystal_density_meas              ?
_exptl_crystal_density_method            ?
_exptl_crystal_F_000                     635.553

_exptl_absorpt_coefficient_mu            0
_exptl_crystal_description               plate
_exptl_crystal_size_max                  0.4
_exptl_crystal_size_mid                  0.2
_exptl_crystal_size_min                  0.2
_exptl_crystal_size_rad                  ?
_exptl_crystal_colour                    ?
_exptl_absorpt_correction_type           ?
_exptl_absorpt_process_details           ?
_exptl_absorpt_correction_T_min          ?
_exptl_absorpt_correction_T_max          ?
loop_
 _exptl_crystal_face_index_h
 _exptl_crystal_face_index_k
 _exptl_crystal_face_index_l
 _exptl_crystal_face_perp_dist
 ? ? ? ?

#=======================================================================

# 7. EXPERIMENTAL DATA

_exptl_special_details                   ?

_diffrn_ambient_temperature              103
_diffrn_source                           ?
_diffrn_source_power                     ?
_diffrn_source_voltage                   ?
_diffrn_source_current                   ?
_diffrn_radiation_type                   electron
_diffrn_radiation_source                 ?
_diffrn_radiation_wavelength             0.02508
_diffrn_radiation_monochromator          ?
_diffrn_measurement_device               TEM_CM200_DIGISTAR_Precession
_diffrn_measurement_device_type          Electron_microscope_with_beam_precession
_diffrn_detector                         ?
_diffrn_detector_area_resol_mean         ?
_diffrn_measurement_method               ?
_diffrn_measurement_specimen_support     ?

_diffrn_reflns_number                    152274
_diffrn_reflns_theta_min                 0.05
_diffrn_reflns_theta_max                 1.01
_diffrn_reflns_theta_full                0.88
_diffrn_measured_fraction_theta_max      0.82
_diffrn_measured_fraction_theta_full     0.93
_diffrn_reflns_av_R_equivalents          0.1837
_diffrn_reflns_av_unetI/netI             1.0918
_diffrn_reflns_limit_h_min               -8
_diffrn_reflns_limit_h_max               9
_diffrn_reflns_limit_k_min               -23
_diffrn_reflns_limit_k_max               23
_diffrn_reflns_limit_l_min               -31
_diffrn_reflns_limit_l_max               26
_diffrn_reflns_reduction_process         ?

_diffrn_standards_number                 ?
_diffrn_standards_interval_count         ?
_diffrn_standards_interval_time          ?
_diffrn_standards_decay_%                ?
loop_
_diffrn_standard_refln_index_h
_diffrn_standard_refln_index_k
_diffrn_standard_refln_index_l
  ? ? ?

_diffrn_radiation_probe                  electron

#=======================================================================

# 8. REFINEMENT DATA

_refine_special_details
?

_reflns_number_total                     17481
_reflns_number_gt                        1040
_reflns_threshold_expression             'I>3\s(I)'

_refine_ls_structure_factor_coef         Fsqd
_refine_ls_R_factor_gt                   0.0966
_refine_ls_wR_factor_gt                  0.1798
_refine_ls_R_factor_all                  0.5174
_refine_ls_wR_factor_ref                 0.2245
_refine_ls_goodness_of_fit_ref           0.7976
_refine_ls_goodness_of_fit_gt            2.7302
_refine_ls_restrained_S_gt               ?
_refine_ls_restrained_S_all              ?
_refine_ls_number_reflns                 17481
_refine_ls_number_parameters             275
_refine_ls_number_restraints             17
_refine_ls_number_constraints            32
_refine_ls_weighting_scheme              sigma
_refine_ls_weighting_details             'calc w=1/[\s^2^(Fo^2^)+(0.02P)^2^+0.0000P] where P=(Fo^2^+2Fc^2^)/3'
_refine_ls_hydrogen_treatment            ?
_refine_ls_shift/su_max                  5.9233
_refine_ls_shift/su_mean                 0.6636
_refine_diff_density_max                 0.17
_refine_diff_density_min                 -0.18
_refine_ls_extinction_method             'none'
_refine_ls_extinction_coef               ?
_refine_ls_extinction_expression         ?
_refine_ls_abs_structure_details         ?
_refine_ls_abs_structure_Flack           ?
_refine_ls_abs_structure_Rogers          ?

loop_
 _atom_type_symbol
 _atom_type_scat_source
 Na  International_Tables_Vol_C
 O   International_Tables_Vol_C
 Si  International_Tables_Vol_C

_computing_data_collection               ?
_computing_cell_refinement               ?
_computing_data_reduction                ?
_computing_structure_solution            ?
_computing_structure_refinement          ?
_computing_molecular_graphics            ?
_computing_publication_material          ?

loop_
 _restr_distance_atom_site_label_1
 _restr_distance_site_symmetry_1
 _restr_distance_atom_site_label_2
 _restr_distance_site_symmetry_2
 _restr_distance_target
 _restr_distance_target_weight_param
Si1 . O6 . 1.62 0.01
Si1 . O16 . 1.62 0.01
Si2 . O1 . 1.62 0.01
Si2 . O3 4_566 1.62 0.01
Si3 . O4 . 1.62 0.01
Si4 . O2 . 1.62 0.01
Si4 . O11 . 1.62 0.01
Si7 . O3 . 1.62 0.01
Si10 . O4 . 1.62 0.01
Si10 . O12 . 1.62 0.01
Na1 . O22 4_465 2.5 0.05
Na1 . Ow3 . 2.5 0.05
Na2 . Ow2 . 2.5 0.02
Na3 . O11 . 2.5 0.05
Na4 . O6 . 2.5 0.05
Na5 . Ow2 . 2.5 0.02
Na6 . O7 . 2.5 0.05

loop_
 _restr_angle_atom_site_label_1
 _restr_angle_site_symmetry_1
 _restr_angle_atom_site_label_2
 _restr_angle_site_symmetry_2
 _restr_angle_atom_site_label_3
 _restr_angle_site_symmetry_3
 _restr_angle_target
 _restr_angle_target_weight_param
 ? ? ? ? ? ? ? ?

loop_
 _restr_torsion_atom_site_label_1
 _restr_torsion_site_symmetry_1
 _restr_torsion_atom_site_label_2
 _restr_torsion_site_symmetry_2
 _restr_torsion_atom_site_label_3
 _restr_torsion_site_symmetry_3
 _restr_torsion_atom_site_label_4
 _restr_torsion_site_symmetry_4
 _restr_torsion_angle_target
 _restr_torsion_weight_param
 ? ? ? ? ? ? ? ? ? ?

loop_
 _restr_equal_distance_atom_site_label_1
 _restr_equal_distance_site_symmetry_1
 _restr_equal_distance_atom_site_label_2
 _restr_equal_distance_site_symmetry_2
 _restr_equal_distance_class_class_id
 _restr_equal_distance_class_target_weight_param
 ? ? ? ? ? ?

loop_
 _restr_equal_angle_atom_site_label_1
 _restr_equal_angle_site_symmetry_1
 _restr_equal_angle_atom_site_label_2
 _restr_equal_angle_site_symmetry_2
 _restr_equal_angle_atom_site_label_3
 _restr_equal_angle_site_symmetry_3
 _restr_equal_angle_class_class_id
 _restr_equal_angle_class_target_weight_param
 ? ? ? ? ? ? ? ?

loop_
 _restr_equal_torsion_atom_site_label_1
 _restr_equal_torsion_site_symmetry_1
 _restr_equal_torsion_atom_site_label_2
 _restr_equal_torsion_site_symmetry_2
 _restr_equal_torsion_atom_site_label_3
 _restr_equal_torsion_site_symmetry_3
 _restr_equal_torsion_atom_site_label_4
 _restr_equal_torsion_site_symmetry_4
 _restr_equal_torsion_class_class_id
 _restr_equal_torsion_class_target_weight_param
 ? ? ? ? ? ? ? ? ? ?


#=======================================================================

# 9. ATOMIC COORDINATES AND DISPLACEMENT PARAMETERS

loop_
 _atom_site_label
 _atom_site_type_symbol
 _atom_site_fract_x
 _atom_site_fract_y
 _atom_site_fract_z
 _atom_site_adp_type
 _atom_site_U_iso_or_equiv
 _atom_site_site_symmetry_multiplicity
 _atom_site_occupancy
 _atom_site_calc_flag
 _atom_site_refinement_flags
 _atom_site_disorder_assembly
 _atom_site_disorder_group
  Si1 Si 0.5476(6) 0.4488(5) 0.36172(17) Uiso 0.0334(17) 8 1 d . . .
  Si2 Si 0.4520(6) 0.5545(4) 0.45250(15) Uiso 0.0218(14) 8 1 d . . .
  Si3 Si 0.75 0.4270(7) 0.1018(3) Uiso 0.046(3) 4 1 d . . .
  Si4 Si 0.4528(6) 0.4422(5) 0.24804(16) Uiso 0.0241(15) 8 1 d . . .
  Si5 Si 0.25 0.3366(7) 0.3955(2) Uiso 0.025(3) 4 1 d . . .
  Si6 Si 0.4550(7) 0.5228(5) 0.14502(17) Uiso 0.0301(17) 8 1 d . . .
  Si7 Si 0.25 0.3344(7) 0.5186(2) Uiso 0.039(3) 4 1 d . . .
  Si8 Si 0.5429(6) 0.6665(6) 0.08679(16) Uiso 0.0337(18) 8 1 d . . .
  Si9 Si 0.75 0.3398(7) 0.2102(3) Uiso 0.043(3) 4 1 d . . .
  Si10 Si 0.75 0.3396(5) -0.0060(2) Uiso 0.044(3) 4 1 d . . .
  O1 O 0.4865(11) 0.5137(8) 0.3979(3) Uiso 0.0702(9) 8 1 d . . .
  O2 O 0.5667(14) 0.3664(6) 0.2405(3) Uiso 0.0702(9) 8 1 d . . .
  O3 O 0.0668(11) 0.3731(6) 0.5385(4) Uiso 0.0702(9) 8 1 d . . .
  O4 O 0.75 0.3853(10) 0.0471(4) Uiso 0.0702(9) 4 1 d . . .
  O5 O 0.25 0.5738(15) 0.4587(5) Uiso 0.0702(9) 4 1 d . . .
  O6 O 0.75 0.4285(14) 0.3694(5) Uiso 0.0702(9) 4 1 d . . .
  O7 O 0.25 0.4195(16) 0.2478(5) Uiso 0.0702(9) 4 1 d . . .
  O8 O 0.25 0.25 0.5363(8) Uiso 0.0702(9) 2 1 d . . .
  O9 O 0.75 0.25 0.2218(9) Uiso 0.0702(9) 2 1 d . . .
  O10 O 0.4254(12) 0.6394(10) 0.0350(3) Uiso 0.0702(9) 8 1 d . . .
  O11 O 0.5023(11) 0.5013(7) 0.2025(3) Uiso 0.0702(9) 8 1 d . . .
  O12 O 0.75 0.25 0.0119(8) Uiso 0.0702(9) 2 1 d . . .
  O13 O 0.25 0.25 0.3758(8) Uiso 0.0702(9) 2 1 d . . .
  O14 O 0.5095(11) 0.4822(10) 0.3013(4) Uiso 0.0702(9) 8 1 d . . .
  O15 O 0.5631(13) 0.4701(10) 0.1051(3) Uiso 0.0702(9) 8 1 d . . .
  O16 O 0.4373(14) 0.3727(7) 0.3692(4) Uiso 0.0702(9) 8 1 d . . .
  O17 O 0.5021(18) 0.75 0.1054(6) Uiso 0.0702(9) 4 1 d . . .
  O18 O 0.25 0.3508(14) 0.4549(5) Uiso 0.0702(9) 4 1 d . . .
  O19 O 0.5063(14) 0.6067(13) 0.1334(4) Uiso 0.0702(9) 8 1 d . . .
  O20 O 0.75 0.3630(14) 0.1475(5) Uiso 0.0702(9) 4 1 d . . .
  O21 O 0.25 0.5069(15) 0.1301(4) Uiso 0.0702(9) 4 1 d . . .
  O22 O 0.75 0.6645(15) 0.0695(5) Uiso 0.0702(9) 4 1 d . . .
  O23 O 0.5 0.5 0.5 Uiso 0.0702(9) 4 1 d . . .
  Na1 Na 0.25 0.415(3) 0.0209(9) Uiso 0.12 4 0.507(13) d . . .
  Na2 Na 0.492(2) 0.25 0.3001(7) Uiso 0.12 4 0.789(15) d . . .
  Na3 Na 0.75 0.553(6) 0.263(2) Uiso 0.12 4 0.212(14) d . . .
  Na4 Na 0.75 0.561(3) 0.343(3) Uiso 0.12 4 0.209(15) d . . .
  Na5 Na 0.93(2) 0.25 0.427(4) Uiso 0.12 4 0.082(19) d . . .
  Na6 Na 0.25 0.547(3) 0.279(2) Uiso 0.12 4 0.240(15) d . . .
  Ow1 O 0.25 0.25 0.2439(13) Uiso 0.13 2 0.71(3) d . . .
  Ow2 O 0.75 0.25 0.3477(13) Uiso 0.13 2 0.70(3) d . . .
  Ow3 O 0.313(9) 0.307(4) 0.079(2) Uiso 0.13 8 0.159(12) d . . .
  Ow4 O 0.75 0.25 0.454(3) Uiso 0.13 2 0.36(4) d . . .

loop_
 _atom_site_aniso_label
  Si1
  Si2
  Si3
  Si4
  Si5
  Si6
  Si7
  Si8
  Si9
  Si1
  O1 
  O2 
  O3 
  O4 
  O5 
  O6 
  O7 
  O8 
  O9 
  O10
  O11
  O12
  O13
  O14
  O15
  O16
  O17
  O18
  O19
  O20
  O21
  O22
  O23
  Na1
  Na2
  Na3
  Na4
  Na5
  Na6
  Ow1
  Ow2
  Ow3
  Ow4


loop_
 _jana_atom_site_ADP_C_label
 _jana_atom_site_ADP_C_type_symbol
 _jana_atom_site_ADP_C_111
 _jana_atom_site_ADP_C_112
 _jana_atom_site_ADP_C_113
 _jana_atom_site_ADP_C_122
 _jana_atom_site_ADP_C_123
 _jana_atom_site_ADP_C_133
 _jana_atom_site_ADP_C_222
 _jana_atom_site_ADP_C_223
 _jana_atom_site_ADP_C_233
 _jana_atom_site_ADP_C_333
 ? ? ? ? ? ? ? ? ? ? ? ?

loop_
 _jana_atom_site_ADP_D_label
 _jana_atom_site_ADP_D_type_symbol
 _jana_atom_site_ADP_D_1111
 _jana_atom_site_ADP_D_1112
 _jana_atom_site_ADP_D_1113
 _jana_atom_site_ADP_D_1122
 _jana_atom_site_ADP_D_1123
 _jana_atom_site_ADP_D_1133
 _jana_atom_site_ADP_D_1222
 _jana_atom_site_ADP_D_1223
 _jana_atom_site_ADP_D_1233
 _jana_atom_site_ADP_D_1333
 _jana_atom_site_ADP_D_2222
 _jana_atom_site_ADP_D_2223
 _jana_atom_site_ADP_D_2233
 _jana_atom_site_ADP_D_2333
 _jana_atom_site_ADP_D_3333
 ? ? ? ? ? ? ? ? ? ? ? ? ? ? ? ? ?

loop_
 _jana_atom_site_ADP_E_label
 _jana_atom_site_ADP_E_type_symbol
 _jana_atom_site_ADP_E_11111
 _jana_atom_site_ADP_E_11112
 _jana_atom_site_ADP_E_11113
 _jana_atom_site_ADP_E_11122
 _jana_atom_site_ADP_E_11123
 _jana_atom_site_ADP_E_11133
 _jana_atom_site_ADP_E_11222
 _jana_atom_site_ADP_E_11223
 _jana_atom_site_ADP_E_11233
 _jana_atom_site_ADP_E_11333
 _jana_atom_site_ADP_E_12222
 _jana_atom_site_ADP_E_12223
 _jana_atom_site_ADP_E_12233
 _jana_atom_site_ADP_E_12333
 _jana_atom_site_ADP_E_13333
 _jana_atom_site_ADP_E_22222
 _jana_atom_site_ADP_E_22223
 _jana_atom_site_ADP_E_22233
 _jana_atom_site_ADP_E_22333
 _jana_atom_site_ADP_E_23333
 _jana_atom_site_ADP_E_33333
 ? ? ? ? ? ? ? ? ? ? ? ? ? ? ? ? ? ? ? ? ? ? ?

loop_
 _jana_atom_site_ADP_F_label
 _jana_atom_site_ADP_F_type_symbol
 _jana_atom_site_ADP_F_111111
 _jana_atom_site_ADP_F_111112
 _jana_atom_site_ADP_F_111113
 _jana_atom_site_ADP_F_111122
 _jana_atom_site_ADP_F_111123
 _jana_atom_site_ADP_F_111133
 _jana_atom_site_ADP_F_111222
 _jana_atom_site_ADP_F_111223
 _jana_atom_site_ADP_F_111233
 _jana_atom_site_ADP_F_111333
 _jana_atom_site_ADP_F_112222
 _jana_atom_site_ADP_F_112223
 _jana_atom_site_ADP_F_112233
 _jana_atom_site_ADP_F_112333
 _jana_atom_site_ADP_F_113333
 _jana_atom_site_ADP_F_122222
 _jana_atom_site_ADP_F_122223
 _jana_atom_site_ADP_F_122233
 _jana_atom_site_ADP_F_122333
 _jana_atom_site_ADP_F_123333
 _jana_atom_site_ADP_F_133333
 _jana_atom_site_ADP_F_222222
 _jana_atom_site_ADP_F_222223
 _jana_atom_site_ADP_F_222233
 _jana_atom_site_ADP_F_222333
 _jana_atom_site_ADP_F_223333
 _jana_atom_site_ADP_F_233333
 _jana_atom_site_ADP_F_333333
 ? ? ? ? ? ? ? ? ? ? ? ? ? ? ? ? ? ? ? ? ? ? ? ? ? ? ? ? ? ?


#=======================================================================

# 10. MOLECULAR GEOMETRY


loop_
 _geom_bond_atom_site_label_1
 _geom_bond_atom_site_label_2
 _geom_bond_site_symmetry_1
 _geom_bond_site_symmetry_2
 _geom_bond_distance
 _geom_bond_publ_flag
  Si1 O1 . . 1.553(14) ?
  Si1 O6 . . 1.570(8) ?
  Si1 O14 . . 1.686(13) ?
  Si1 O16 . . 1.601(14) ?
  Si2 O1 . . 1.599(11) ?
  Si2 O3 . 4_566 1.569(12) ?
  Si2 O5 . . 1.559(7) ?
  Si2 O23 . . 1.600(5) ?
  Si3 O4 . . 1.589(15) ?
  Si3 O15 . . 1.599(14) ?
  Si3 O15 . 8_655 1.599(14) ?
  Si3 O20 . . 1.64(2) ?
  Si4 O2 . . 1.611(13) ?
  Si4 O7 . . 1.572(9) ?
  Si4 O11 . . 1.618(12) ?
  Si4 O14 . . 1.598(13) ?
  Si5 O13 . . 1.627(14) ?
  Si5 O16 . . 1.684(12) ?
  Si5 O16 . 8_555 1.684(12) ?
  Si5 O18 . . 1.544(15) ?
  Si6 O11 . . 1.564(10) ?
  Si6 O15 . . 1.609(15) ?
  Si6 O19 . . 1.57(2) ?
  Si6 O21 . . 1.607(7) ?
  Si7 O3 . . 1.617(11) ?
  Si7 O3 . 8_555 1.617(11) ?
  Si7 O8 . . 1.574(13) ?
  Si7 O18 . . 1.662(15) ?
  Si8 O10 . . 1.665(11) ?
  Si8 O17 . . 1.594(11) ?
  Si8 O19 . . 1.626(18) ?
  Si8 O22 . . 1.613(6) ?
  Si9 O2 . . 1.646(11) ?
  Si9 O2 . 8_655 1.646(11) ?
  Si9 O9 . . 1.629(13) ?
  Si9 O20 . . 1.662(16) ?
  Si10 O4 . . 1.588(15) ?
  Si10 O10 . 4_565 1.556(10) ?
  Si10 O10 . 5_665 1.556(10) ?
  Si10 O12 . . 1.663(10) ?
  Na1 O10 . 4_465 2.99(2) ?
  Na1 O10 . 5_665 2.99(2) ?
  Na1 O22 . 4_465 2.72(4) ?
  Na1 Ow3 . . 2.50(8) ?
  Na1 Ow3 . 8_555 2.50(8) ?
  Na2 O2 . . 2.639(15) ?
  Na2 O2 . 7_555 2.639(15) ?
  Na2 O9 . . 2.79(2) ?
  Na2 O13 . . 2.66(2) ?
  Na2 O16 . . 2.847(15) ?
  Na2 O16 . 7_555 2.847(15) ?
  Na2 Ow1 . . 2.32(3) ?
  Na2 Ow2 . . 2.28(2) ?
  Na3 O11 . . 2.58(5) ?
  Na3 O11 . 8_655 2.58(5) ?
  Na3 O14 . . 2.41(6) ?
  Na3 O14 . 8_655 2.41(6) ?
  Na4 O1 . . 2.57(4) ?
  Na4 O1 . 8_655 2.57(4) ?
  Na4 O6 . . 2.46(6) ?
  Na4 O14 . . 2.52(4) ?
  Na4 O14 . 8_655 2.52(4) ?
  Na5 O13 . 1_655 2.73(17) ?
  Na5 O16 . 2_655 2.83(9) ?
  Na5 O16 . 8_655 2.83(9) ?
  Na5 O18 . 1_655 3.08(15) ?
  Na5 O18 . 2_655 3.08(15) ?
  Na5 Ow2 . . 2.44(14) ?
  Na5 Ow4 . . 1.51(17) ?
  Na6 O7 . . 2.42(6) ?
  Na6 O11 . . 2.84(4) ?
  Na6 O11 . 8_555 2.84(4) ?
  Na6 O14 . . 2.34(3) ?
  Na6 O14 . 8_555 2.34(3) ?

loop_
 _geom_angle_atom_site_label_1
 _geom_angle_atom_site_label_2
 _geom_angle_atom_site_label_3
 _geom_angle_site_symmetry_1
 _geom_angle_site_symmetry_2
 _geom_angle_site_symmetry_3
 _geom_angle
 _geom_angle_publ_flag
 ? ? ? ? ? ? ? ?

loop_
 _geom_torsion_atom_site_label_1
 _geom_torsion_atom_site_label_2
 _geom_torsion_atom_site_label_3
 _geom_torsion_atom_site_label_4
 _geom_torsion_site_symmetry_1
 _geom_torsion_site_symmetry_2
 _geom_torsion_site_symmetry_3
 _geom_torsion_site_symmetry_4
 _geom_torsion
 _geom_torsion_publ_flag
 ? ? ? ? ? ? ? ? ? ?

loop_
 _geom_hbond_atom_site_label_D
 _geom_hbond_atom_site_label_H
 _geom_hbond_atom_site_label_A
 _geom_hbond_site_symmetry_D
 _geom_hbond_site_symmetry_H
 _geom_hbond_site_symmetry_A
 _geom_hbond_distance_DH
 _geom_hbond_distance_HA
 _geom_hbond_distance_DA
 _geom_hbond_angle_DHA
 _geom_hbond_publ_flag
 ? ? ? ? ? ? ? ? ? ? ?


#=======================================================================

# 11. STRUCTURE-FACTOR LIST

loop_
 _reflns_scale_group_code
 _reflns_scale_meas_intensity
    1  1706.758
    2   465.722
    5  2248.787
    6  2233.119
    7   612.459
    8  1244.268
   11   889.782
   12  3440.996
   13  1812.337
   14  3145.519
   16  7053.750
   17   833.319
   18  1248.467
   19   962.034
   21  1239.726
   22  1110.999
   23  1199.048
   25  3122.208
   26  4205.966
   27  2385.482
   28  1436.966
   29  1428.311
   30  1694.551
   34   794.484
   35 -8605.563
   36  1807.991
   37  3114.333
   39   732.106
   40  1074.703
   41  1855.047
   42  2003.982
   44  1565.109
   45  1595.936
   46  1509.900
   47  1401.128
   48  1451.988
   49  1681.170
   50  1603.294
   51  1575.606
   52  1215.184
   53   986.291
   54  1197.863
   55  1175.014
   56   653.189
   57  1988.573
   58  1626.079
   59  1596.996
   60  1225.067
   61  1455.392
   62  1106.873
   63  1646.599
   64   606.213
   65  1572.895
   66   973.811
   67  1222.377
   68  1996.340
   70   844.869
   73 -1754.766
   75  1109.532
   76  1030.586
   77  1546.184
   78  1134.461
   79  1223.776
   80  1148.700
   81   910.808
   82   969.033
   83   873.079
   84   643.129
   85  1234.374
   86   672.132
   87   441.420
   88   494.852
   90   695.655
   91   740.399
   94   744.551
   95  -949.224
   96   312.004
   98   305.286
   99   363.901
  103   526.276
  104   546.713
loop_
 _refln_index_h
 _refln_index_k
 _refln_index_l
 _refln_intensity_calc
 _refln_intensity_meas
 _refln_intensity_sigma
 _refln_scale_group_code
 _refln_observed_status
  -7  -7 -19     0.31   -37.70   130.80      1 <
  -7  -7 -18     3.11     5.10   134.30      1 <
  -7  -6 -21     0.79   -16.60   134.60      1 <
  -6 -13   7     0.62   -35.80   134.70      1 <
  -6 -12   3     1.37   -27.60   134.60      1 <
  -6 -12   4     1.12   -23.50   129.60      1 <
  -6 -10  -3     2.80    92.40   138.20      1 <
  -6  -9  -7    20.23   -42.10   133.20      1 <
  -6  -9  -6    14.29   -34.20   133.10      1 <
  -6  -8 -10    54.32   -26.00   112.10      1 <
  -6  -7 -13     4.95    11.80   126.80      1 <
  -6  -6 -16     4.22   -11.40   130.20      1 <
  -6  -5 -20     0.81    -7.90   123.30      1 <
  -6  -5 -19     5.73    55.00   128.20      1 <
  -6  -4 -23     0.43    30.20   124.00      1 <
  -6  -4 -22     2.24   -26.70   124.20      1 <
  -6  -3 -25     1.52    -5.00   112.10      1 <
  -5 -14  16     0.72    57.60   134.40      1 <
  -5 -14  17     1.66   -29.20   131.00      1 <
  -5 -13  13     1.61    78.70   132.10      1 <
  -5 -12   9    23.41   -39.50   133.60      1 <
  -5 -12  10     6.70   -16.40   128.80      1 <
  -5 -11   6    90.75   142.40   141.60      1 <
  -5 -10   3     9.66    99.30   132.10      1 <
  -5  -9  -1   248.28   363.60   156.90      1 <
  -5  -8  -4   247.01    21.70   173.70      1 <
  -5  -7  -7   142.56    26.30   142.80      1 <
  -5  -6 -11    56.51    -7.20   129.00      1 <
  -5  -6 -10    95.87    44.10   131.50      1 <
  -5  -5 -14    30.28    72.10   126.90      1 <
  -5  -4 -17     2.57   -13.30   134.00      1 <
  -5  -3 -20     5.90    -0.20   112.10      1 <
  -5  -2 -23     4.30    -2.10   112.10      1 <
  -5  -1 -26     1.77     8.00   118.60      1 <
  -4 -13  19     4.73   -27.50   129.50      1 <
  -4 -13  20     2.96    -6.40   112.10      1 <
  -4 -12  15    13.44   -25.00   127.20      1 <
  -4 -12  16     4.74   -20.80   127.30      1 <
  -4 -11  12    17.06    -8.60   133.60      1 <
  -4 -10   9    57.85     2.50   128.90      1 <
  -4  -9   5    13.46   -49.10   128.60      1 <
  -4  -8   2    41.11    64.50   145.20      1 <
  -4  -7  -1    11.94    98.70   133.20      1 <
  -4  -6  -5   153.59   234.80   137.10      1 <
  -4  -5  -8   155.26    58.10   144.70      1 <
  -4  -4 -11    24.03    -6.50   136.70      1 <
  -4  -3 -14    18.66   -21.70   127.40      1 <
  -4  -2 -17    17.00    37.80   128.90      1 <
  -4  -1 -21    16.99    30.90   128.70      1 <
  -4  -1 -20     5.75    40.00   126.10      1 <
  -4   0 -24     1.22    -1.60   112.10      1 <
  -4   0 -23     3.43    -4.00   112.10      1 <
  -4   1 -27     6.15    30.20   122.60      1 <
  -4   1 -26     0.91   -13.90   123.60      1 <
  -4   2 -30     0.32    -2.00   112.10      1 <
  -4   2 -29     0.77   -19.60   124.30      1 <
  -3 -12  22     1.48     0.30   125.00      1 <
  -3 -11  18    22.98     2.60   124.50      1 <
  -3 -11  19    24.46   -24.50   130.00      1 <
  -3 -10  15    37.80    49.60   129.90      1 <
  -3  -9  12    11.72    68.00   126.70      1 <
  -3  -8   8   475.31   426.20   141.80      1 o
  -3  -7   5    79.53    76.60   168.70      1 <
  -3  -5  -2   370.02   302.60   155.60      1 <
  -3  -4  -5  1052.30  1243.20   213.90      1 o
  -3  -1 -15    17.81   -25.00   147.30      1 <
  -3   0 -18   411.44   723.90   144.50      1 o
  -3   1 -21    22.00   -11.70   128.90      1 <
  -3   2 -24     0.89    -7.30   118.90      1 <
  -3   3 -27     3.97    -3.80   112.10      1 <
  -3   4 -30     0.95     5.50   119.60      1 <
  -2 -10  21     5.11   -32.00   122.00      1 <
  -2 -10  22    23.48    75.30   127.10      1 <
  -2  -9  18     2.33    45.40   139.90      1 <
  -2  -8  14    12.87    70.90   129.10      1 <
  -2  -7  11    45.63    25.60   139.80      1 <
  -2  -5   4  1498.00  2131.90   195.60      1 o
  -2  -4   1   234.05   346.80   201.70      1 <
  -2  -1  -9   602.46  1048.40   172.50      1 o
  -2   0 -12   123.53    88.00   155.50      1 <
  -2   1 -15    11.20     4.10   147.90      1 <
  -2   2 -18    64.24   141.10   127.90      1 <
  -2   3 -21    28.90    92.80   126.80      1 <
  -2   4 -25     0.86    66.20   126.90      1 <
  -2   4 -24    46.96    29.80   129.50      1 <
  -2   5 -28     4.68    49.70   122.90      1 <
  -2   5 -27    38.11     1.30   126.10      1 <
  -1  -8  21    15.85   -32.20   127.30      1 <
  -1  -7  17     2.66    58.90   134.30      1 <
  -1  -6  14    15.19   148.50   141.90      1 <
  -1  -4   7    66.93  -100.00   178.60      1 <
  -1   0  -6   491.54   158.60   233.90      1 <
  -1   3 -16    62.75    49.90   139.80      1 <
  -1   4 -19    13.17    52.80   137.30      1 <
  -1   5 -22    43.00    14.40   129.90      1 <
  -1   6 -25     9.02   132.20   126.50      1 <
  -1   7 -28     1.93    59.50   124.80      1 <
   0  -6  20    11.01   129.20   131.20      1 <
   0  -6  21    11.90   119.40   126.50      1 <
   0  -5  17  1741.40  1641.80   213.20      1 o
   0  -3  10   738.04   536.20   168.90      1 o
   0   4 -13   319.82   440.60   143.10      1 o
   0   5 -16  1760.70  1963.30   215.90      1 o
   0   6 -19    65.76    40.30   130.50      1 <
   0   7 -22    10.24    18.90   130.20      1 <
   0   8 -25    21.60    87.60   125.80      1 <
   0   9 -28     0.45   -20.00   122.70      1 <
   1  -5  23     4.15    73.30   128.20      1 <
   1  -4  20    36.49    63.70   127.40      1 <
   1  -3  16    61.90    36.90   134.00      1 <
   1  -2  13    43.24    62.30   145.40      1 <
   1   1   3  1674.80  1741.10   286.40      1 o
   1   4  -7    58.35   214.80   188.80      1 <
   1   5 -10    87.07   141.10   152.10      1 <
   1   6 -13    13.94   150.20   131.90      1 <
   1   7 -16    14.69   120.80   130.10      1 <
   1   8 -19    21.77   -28.00   125.70      1 <
   1   9 -22     1.66   130.80   125.90      1 <
   1  10 -26     0.69     1.30   118.50      1 <
   1  10 -25     2.30   -16.30   123.40      1 <
   1  11 -28     0.67    -1.00   121.70      1 <
   2  -3  23    21.34    63.30   133.20      1 <
   2  -2  19    12.35   -10.40   144.00      1 <
   2  -2  20   534.14   968.90   149.90      1 o
   2  -1  16   773.37   254.40   158.90      1 <
   2   0  13    45.37   138.70   136.30      1 <
   2   1   9   617.12   135.20   181.40      1 <
   2   2   6  1647.20  1133.50   225.20      1 o
   2   5  -4  1508.40  1935.60   192.00      1 o
   2   6  -7   573.96   323.20   150.80      1 <
   2   7 -10    87.86   101.40   129.10      1 <
   2   8 -13    38.85     7.70   125.80      1 <
   2   9 -16   370.44   402.80   142.60      1 <
   2  10 -20    17.11    15.30   127.30      1 <
   2  10 -19    16.05   -18.30   122.50      1 <
   2  11 -23     1.96    -4.60   124.70      1 <
   2  11 -22    16.39    27.40   119.90      1 <
   2  12 -26    12.10    84.90   121.10      1 <
   2  12 -25     2.69     0.70   112.10      1 <
   3  -1  22    23.22    -9.80   129.20      1 <
   3  -1  23     5.71    66.00   124.00      1 <
   3   0  19     6.26    53.10   125.20      1 <
   3   1  16     3.04     7.10   133.30      1 <
   3   2  12   148.58   -32.90   130.40      1 <
   3   3   9   140.33   -24.40   136.60      1 <
   3   4   6  1696.80   792.70   184.10      1 o
   3   6  -1   209.09   -24.30   130.70      1 <
   3   7  -4  1382.90  1134.10   152.60      1 o
   3   8  -7    92.63    36.70   150.30      1 <
   3   9 -10    17.01    -1.10   124.40      1 <
   3  10 -14     4.90   -16.20   124.10      1 <
   3  10 -13     1.31   -26.00   119.70      1 <
   3  11 -17    25.13    70.30   123.40      1 <
   3  11 -16     5.82   -10.00   122.80      1 <
   3  12 -20    32.08    33.70   119.80      1 <
   3  12 -19    23.70   -15.90   112.10      1 <
   3  13 -23     0.61   -11.70   119.40      1 <
   3  13 -22    43.53     2.90   122.20      1 <
   4   1  22     4.54   -25.10   127.50      1 <
   4   1  23     3.75    62.40   125.30      1 <
   4   2  19    12.29   -21.50   120.20      1 <
   4   3  15    16.59     2.40   132.90      1 <
   4   3  16   210.77   203.40   133.30      1 <
   4   4  12    54.75   126.20   131.70      1 <
   4   5   9    22.23    56.20   136.40      1 <
   4   6   5   150.76   -21.40   130.90      1 <
   4   7   2    64.60    91.40   135.70      1 <
   4   8  -1    47.30   -25.40   126.30      1 <
   4   9  -4    13.77   178.90   128.50      1 <
   4  10  -7    27.40    54.80   123.20      1 <
   4  11 -11     1.82    22.20   126.50      1 <
   4  11 -10    45.77    29.00   126.70      1 <
   4  12 -14     3.64   -10.60   120.20      1 <
   4  12 -13    20.18   -17.00   120.30      1 <
   4  13 -17    16.34    -9.30   123.10      1 <
   4  13 -16     3.53    16.30   122.40      1 <
   4  14 -20     3.77    60.00   125.30      1 <
   4  14 -19     0.60     0.20   124.20      1 <
   5   2  25    16.69    31.80   121.40      1 <
   5   3  22    74.19   104.90   126.40      1 <
   5   3  23    17.97   -14.10   126.70      1 <
   5   4  19    29.27    -9.40   123.20      1 <
   5   5  15     2.05    -2.00   125.10      1 <
   5   5  16   109.99     3.50   124.30      1 <
   5   6  12    10.27   -10.80   131.20      1 <
   5   7   9    70.11   -10.30   126.90      1 <
   5   8   5   875.10   925.50   142.50      1 o
   5   9   2   101.33    91.50   147.10      1 <
   5  10  -1    16.89    13.30   126.00      1 <
   5  11  -4    27.92   -15.90   123.20      1 <
   5  12  -8    96.04    24.60   123.00      1 <
   5  12  -7     6.02   -17.90   122.70      1 <
   5  13 -11    78.54   -16.40   126.20      1 <
   5  13 -10     2.79    11.10   125.00      1 <
   5  14 -14     1.68    36.80   123.60      1 <
   5  14 -13     2.23   -20.00   124.60      1 <
   5  15 -17     2.38   -23.30   118.90      1 <
   5  15 -16     0.71   -14.60   121.80      1 <
   6   4  25     1.75   -21.00   122.80      1 <
   6   5  22     2.81    84.30   121.90      1 <
   6   6  18     2.81    -7.70   122.10      1 <
   6   6  19     1.00    -2.80   122.80      1 <
   6   7  15     2.17   -25.60   128.20      1 <
   6   8  12     2.24   -20.50   120.70      1 <
   6   9   8     6.24    -3.20   118.50      1 <
   6   9   9     1.27   -21.00   126.20      1 <
   6  10   5    27.26     9.30   127.00      1 <
   6  11   2     2.99    23.00   126.20      1 <
   6  12  -1     0.98    32.10   128.30      1 <
   6  13  -5     2.34    76.50   130.80      1 <
   6  13  -4     5.75   -29.70   129.40      1 <
   6  14  -8     2.01   -18.20   122.50      1 <
   6  14  -7     3.81     4.20   127.70      1 <
   6  15 -11     0.26    61.10   129.90      1 <
   6  15 -10     0.75     0.80   125.30      1 <
   7   8  18     3.70    66.80   128.90      1 <
   7   8  19     0.32    -0.40   126.40      1 <
   7   9  15     0.82   -33.00   129.20      1 <
   7   9  16     2.69    38.80   128.00      1 <
   7  10  11     7.62    68.90   133.00      1 <
   7  10  12     2.36   -13.90   123.30      1 <
  -7  -8 -12     4.06   -30.30   132.10      2 <
  -7  -7 -16     1.70    95.60   129.60      2 <
  -7  -6 -20     2.82    17.00   133.70      2 <
  -7  -6 -19     2.81   -34.90   128.30      2 <
  -7  -5 -22    14.10    12.00   131.10      2 <
  -6 -14  14     1.14   160.00   133.50      2 <
  -6 -14  15     0.71    -9.60   112.10      2 <
  -6 -13  11     2.68   136.70   139.90      2 <
  -6 -12   7     2.73    66.10   137.30      2 <
  -6 -12   8     1.20   -10.40   135.20      2 <
  -6 -11   3     4.04     8.80   133.90      2 <
  -6 -11   4     3.45    -5.80   112.10      2 <
  -6 -10   0    42.00    -2.30   129.10      2 <
  -6  -9  -4    30.79    -7.40   130.20      2 <
  -6  -9  -3     6.46    43.10   136.80      2 <
  -6  -8  -7     8.56   124.90   136.50      2 <
  -6  -7 -11     6.99    17.90   130.40      2 <
  -6  -7 -10     3.42    44.00   132.60      2 <
  -6  -6 -14     1.16    87.20   135.80      2 <
  -6  -5 -18    10.83   -29.00   127.00      2 <
  -6  -5 -17    26.84    27.50   126.20      2 <
  -6  -4 -21     0.45   -28.20   120.60      2 <
  -6  -4 -20    17.93   -15.00   122.70      2 <
  -6  -3 -24     0.14    26.70   127.70      2 <
  -5 -14  20     0.06    49.40   139.60      2 <
  -5 -13  17     1.62    23.10   132.50      2 <
  -5 -13  18     0.63   -18.70   130.10      2 <
  -5 -12  13     3.95    80.00   126.90      2 <
  -5 -12  14     3.57    92.20   132.60      2 <
  -5 -11   9    28.86    31.00   136.20      2 <
  -5 -11  10     1.68    78.90   135.60      2 <
  -5 -10   6    21.12   -31.10   139.80      2 <
  -5  -9   2    25.43    30.20   146.70      2 <
  -5  -8  -1    13.98    12.80   148.40      2 <
  -5  -7  -5    16.11   -29.30   131.40      2 <
  -5  -6  -8   116.86    50.40   131.10      2 <
  -5  -5 -12    54.49   -22.30   136.30      2 <
  -5  -4 -15     4.42   -11.40   130.50      2 <
  -5  -3 -19     3.10   -20.90   125.60      2 <
  -5  -3 -18     6.95    -0.20   112.10      2 <
  -5  -2 -22     1.19   -16.00   126.50      2 <
  -5  -1 -25     1.75   -20.00   112.10      2 <
  -5   0 -28     8.62    -4.20   112.10      2 <
  -4 -12  19     1.94   -10.90   123.10      2 <
  -4 -12  20     1.31   -14.00   126.80      2 <
  -4 -11  15     1.98    63.60   127.30      2 <
  -4 -11  16     5.86   -34.10   128.30      2 <
  -4 -10  12     7.27    13.30   143.60      2 <
  -4  -9   8     1.36   -10.20   141.00      2 <
  -4  -8   5     6.93   -28.80   131.90      2 <
  -4  -7   1    36.31     2.40   130.80      2 <
  -4  -6  -3    52.27    41.90   132.60      2 <
  -4  -5  -6    59.04    14.10   144.50      2 <
  -4  -4 -10    64.99    -1.60   112.10      2 <
  -4  -3 -13    73.89   -11.10   112.10      2 <
  -4  -2 -16    30.44   -21.90   121.50      2 <
  -4  -1 -20    14.32    15.00   126.90      2 <
  -4   0 -23     2.98    -1.50   112.10      2 <
  -4   1 -27     2.59    13.90   123.60      2 <
  -4   1 -26     0.62     5.10   122.40      2 <
  -4   2 -30     0.41    -2.20   112.10      2 <
  -4   2 -29     0.51    56.30   123.30      2 <
  -3 -11  22     2.10   -29.60   129.90      2 <
  -3 -10  18     1.59    -0.40   112.10      2 <
  -3  -9  14    71.09   -14.40   131.30      2 <
  -3  -9  15    46.88   -42.40   129.90      2 <
  -3  -8  11    38.91   -11.90   131.00      2 <
  -3  -7   7    14.34   -25.70   147.20      2 <
  -3  -6   3   364.29   222.20   148.30      2 <
  -3  -5   0   793.15   -79.80   145.30      2 <
  -3  -4  -4   934.10   698.50   190.10      2 o
  -3  -3  -7    62.95   -53.50   148.70      2 <
  -3  -2 -11   293.03  1570.20   160.40      2 o
  -3  -1 -14    78.76   149.10   134.40      2 <
  -3   0 -17    10.50    -2.00   112.10      2 <
  -3   1 -21     7.53    14.10   127.70      2 <
  -3   2 -24     0.39   -13.80   124.60      2 <
  -3   3 -28     1.11    15.30   121.50      2 <
  -3   3 -27     0.51   -13.00   120.10      2 <
  -2  -9  20     9.85    -1.00   112.10      2 <
  -2  -9  21     0.93    -2.50   112.10      2 <
  -2  -8  17     4.06     6.60   131.20      2 <
  -2  -7  13    12.55   -10.50   132.30      2 <
  -2  -6   9    59.11   -15.00   143.80      2 <
  -2  -5   6   207.01   209.80   160.90      2 <
  -2  -4   2    74.17   -96.70   195.60      2 <
  -2  -2  -5  2281.20  3203.00   260.70      2 o
  -2   0 -12    50.67    47.20   142.60      2 <
  -2   1 -15    26.14    36.20   143.80      2 <
  -2   2 -19     8.76    69.00   158.70      2 <
  -2   2 -18    19.99   252.60   130.60      2 <
  -2   3 -22     3.30    -8.00   126.70      2 <
  -2   4 -25     2.85    -4.00   123.10      2 <
  -2   5 -29     0.29    93.30   128.30      2 <
  -2   5 -28     9.64    73.30   127.00      2 <
  -1  -8  23     0.63   -10.30   121.80      2 <
  -1  -7  19    28.18    25.30   128.10      2 <
  -1  -7  20    15.04    -8.50   128.60      2 <
  -1  -6  16     6.80    -0.30   129.80      2 <
  -1  -5  12   229.30   432.50   167.90      2 <
  -1  -4   8    93.38    90.30   163.30      2 <
  -1  -2   1  1093.10   964.30   283.30      2 o
  -1   0  -6   165.94   236.60   234.60      2 <
  -1   2 -13    61.19   -42.60   148.80      2 <
  -1   3 -16    66.00    76.30   128.20      2 <
  -1   4 -19     8.77   -19.70   112.10      2 <
  -1   5 -23     6.01    59.80   127.40      2 <
  -1   6 -26    11.50    -3.30   112.10      2 <
  -1   7 -29     1.61   -17.00   125.60      2 <
   0  -6  22     3.31   -19.50   128.60      2 <
   0  -5  18    42.38    83.70   170.90      2 <
   0  -3  11   154.80   234.80   176.10      2 <
   0  -2   7  1988.80  4658.10   261.10      2 o
   0   2  -7  1995.80  4633.90   257.80      2 o
   0   4 -14   119.86    56.10   147.40      2 <
   0   5 -17   686.37  1282.80   200.70      2 o
   0   6 -20    23.51    -6.90   129.10      2 <
   0   7 -24    12.31    58.50   126.10      2 <
   0   7 -23    34.89   -21.00   112.10      2 <
   0   8 -27     2.22    25.70   121.80      2 <
   1  -4  21     1.45    12.20   132.60      2 <
   1  -3  17     9.00    22.50   134.20      2 <
   1  -2  13    33.89   -31.20   140.90      2 <
   1  -1  10    67.00   -14.50   181.10      2 <
   1   0   6   170.97  -100.00   218.10      2 <
   1   2  -1  1077.90   101.40   262.80      2 <
   1   4  -8    91.93    80.50   176.30      2 <
   1   5 -11   510.68  1071.90   168.80      2 o
   1   6 -15     8.34    21.80   137.90      2 <
   1   7 -18     6.66   -22.60   124.10      2 <
   1   8 -21     3.18    -3.50   112.10      2 <
   1   9 -25     0.54    -8.90   112.10      2 <
   1   9 -24     1.79    -9.20   112.10      2 <
   1  10 -28     0.46    13.70   118.70      2 <
   1  10 -27     3.26    -4.80   120.20      2 <
   2  -3  23    23.72    46.20   129.80      2 <
   2  -3  24     7.26   -11.20   122.10      2 <
   2  -2  20   302.57   843.90   144.80      2 o
   2  -1  16   342.74   741.80   159.90      2 o
   2   0  12    80.64   -10.30   138.90      2 <
   2   1   9   427.40  1351.60   186.80      2 o
   2   2   5  2328.90   276.60   224.10      2 <
   2   4  -2    67.67    77.60   197.60      2 <
   2   6  -9    36.16    -3.70   138.00      2 <
   2   7 -12    60.46   225.90   133.80      2 <
   2   8 -16    20.33    -0.50   112.10      2 <
   2   8 -15    13.52     2.20   129.70      2 <
   2   9 -19    18.05   -11.10   123.70      2 <
   2  10 -22    22.11     0.10   112.10      2 <
   2  11 -26     0.19    -1.50   123.10      2 <
   2  11 -25     2.60    74.80   121.20      2 <
   3  -1  22     9.53    -4.70   112.10      2 <
   3  -1  23    19.01    36.40   124.70      2 <
   3   0  19     3.93   -28.20   129.50      2 <
   3   1  15    12.18    13.60   130.50      2 <
   3   2  11   295.78    12.30   138.90      2 <
   3   3   8    78.07   -38.10   137.20      2 <
   3   4   4   890.40    35.30   181.90      2 <
   3   5   1    13.39    72.60   161.50      2 <
   3   6  -3   300.40   -21.20   139.20      2 <
   3   7  -6   149.20   -16.30   131.10      2 <
   3   8 -10     4.64    87.60   135.00      2 <
   3   9 -13    19.96    60.20   127.00      2 <
   3  10 -16    18.40    55.50   126.60      2 <
   3  11 -20     9.52     7.60   120.80      2 <
   3  11 -19     3.37    -5.50   119.90      2 <
   3  12 -23     0.45    -2.30   112.10      2 <
   3  12 -22     3.78    -3.90   112.10      2 <
   4   1  21     2.99     0.90   112.10      2 <
   4   1  22    23.49   -15.50   119.00      2 <
   4   2  18    14.48    45.10   131.90      2 <
   4   3  14     9.78   -30.20   125.40      2 <
   4   4  11    10.43    22.70   129.30      2 <
   4   5   7   116.91    -8.10   129.70      2 <
   4   6   3    44.91    73.50   137.70      2 <
   4   8  -4    34.25   -16.90   132.50      2 <
   4   9  -7    85.25   -36.70   127.70      2 <
   4  10 -10    14.63    -2.50   122.80      2 <
   4  11 -14    15.01    -5.80   124.90      2 <
   4  12 -17     1.20     7.90   123.20      2 <
   4  13 -21     1.14   -15.00   122.80      2 <
   4  13 -20     0.81   -14.50   117.20      2 <
   5   2  24     0.76    -8.90   120.10      2 <
   5   2  25     9.80   -20.10   119.50      2 <
   5   3  20    46.54     1.00   112.10      2 <
   5   3  21    23.83   -13.50   125.00      2 <
   5   4  17     2.81    72.30   129.40      2 <
   5   5  13    69.06    75.40   128.70      2 <
   5   6  10    42.63   -31.70   124.80      2 <
   5   7   6   155.90   -39.90   129.50      2 <
   5   8   3    74.49    77.50   127.40      2 <
   5   9  -1    55.18   -25.60   128.10      2 <
   5  10  -4    13.93   118.30   128.10      2 <
   5  11  -8     9.33   -12.70   122.90      2 <
   5  12 -11     1.66    37.60   121.40      2 <
   5  13 -15     0.49    31.20   126.00      2 <
   5  13 -14     0.80   -13.90   124.40      2 <
   5  14 -18     0.79    32.50   128.60      2 <
   5  14 -17     2.21    13.30   128.50      2 <
   6   4  23     3.37   -13.40   120.50      2 <
   6   4  24     0.41   -23.70   121.00      2 <
   6   5  20     0.72    12.50   124.70      2 <
   6   6  16     0.57   -29.80   124.30      2 <
   6   6  17     5.02   -17.10   120.00      2 <
   6   7  12    13.96    90.80   125.50      2 <
   6   7  13     1.60    34.10   123.90      2 <
   6   8   9     3.42    -8.40   126.70      2 <
   6   9   5     1.54    10.40   130.10      2 <
   6   9   6     3.02    24.30   130.00      2 <
   6  10   2     3.99    54.50   127.30      2 <
   6  11  -2    15.99    30.00   130.80      2 <
   6  11  -1     9.38    31.70   128.10      2 <
   6  12  -5     1.99    90.00   126.00      2 <
   6  13  -9    16.49   -29.30   124.50      2 <
   6  13  -8     2.24   -17.80   121.50      2 <
   6  14 -12     3.18    -4.80   127.90      2 <
   6  14 -11     4.53   118.60   127.90      2 <
   7   7  19     0.45   -22.20   129.60      2 <
   7   7  20     9.99    44.00   124.10      2 <
   7   8  15    34.26    57.60   125.50      2 <
   7   8  16     3.01    54.40   129.70      2 <
   7   9  12     2.87   -20.80   127.90      2 <
   7  10   8     3.67   -49.70   136.90      2 <
   7  10   9     1.44    50.50   136.20      2 <
   7  11   4     0.56    56.00   131.00      2 <
   7  11   5     9.64   -42.10   128.80      2 <
  -7  -7 -18     0.71    77.80   142.60      5 <
  -7  -7 -17     1.13    83.70   142.50      5 <
  -7  -6 -21     0.31   -17.50   139.10      5 <
  -6 -13  13     0.30   142.00   147.70      5 <
  -6 -13  14     0.92    22.00   143.40      5 <
  -6 -12   9     0.45   139.70   147.30      5 <
  -6 -11   4     1.16     3.80   142.80      5 <
  -6 -11   5     3.24   -21.20   140.90      5 <
  -6 -10   0   372.26   134.10   142.60      5 <
  -6 -10   1    10.14    39.50   146.20      5 <
  -6  -9  -4    30.60    -2.70   137.50      5 <
  -6  -9  -3     1.90   120.60   135.60      5 <
  -6  -8  -7     4.66    24.80   138.40      5 <
  -6  -7 -11     3.31   -14.10   136.60      5 <
  -6  -6 -15    39.48   -41.60   129.10      5 <
  -6  -5 -19     4.89   -27.40   126.40      5 <
  -6  -5 -18     9.14   -36.40   129.80      5 <
  -6  -4 -23     0.40    70.60   128.50      5 <
  -6  -4 -22     2.45   -51.50   129.60      5 <
  -5 -13  19    10.01   -21.00   133.30      5 <
  -5 -13  20     1.93   -47.20   134.40      5 <
  -5 -13  21    16.87   -13.40   133.30      5 <
  -5 -12  15     9.83   161.90   138.00      5 <
  -5 -12  16     5.45    48.00   144.40      5 <
  -5 -11  11   122.54   201.10   140.70      5 <
  -5 -11  12   124.70    84.90   142.50      5 <
  -5 -10   7    15.24    -3.90   136.00      5 <
  -5 -10   8    57.51   130.80   141.40      5 <
  -5  -9   3    11.22   119.50   136.00      5 <
  -5  -8  -1     5.68   -13.00   137.20      5 <
  -5  -7  -5    33.73    34.80   158.00      5 <
  -5  -6  -9    77.77   -25.20   162.20      5 <
  -5  -5 -13   160.70    90.60   149.30      5 <
  -5  -5 -12   340.00    38.00   146.40      5 <
  -5  -4 -17     2.00    31.00   138.00      5 <
  -5  -4 -16    66.68    62.90   128.90      5 <
  -5  -3 -20    27.98   152.20   129.50      5 <
  -5  -2 -24     1.10   -22.40   133.40      5 <
  -5  -1 -28     2.18    -3.30   124.70      5 <
  -5  -1 -27     4.22    56.40   124.70      5 <
  -4 -12  22     3.66     1.40   133.10      5 <
  -4 -11  18     1.11   -38.40   131.20      5 <
  -4 -11  19     7.57    58.20   128.80      5 <
  -4 -10  14     3.95    -7.40   139.00      5 <
  -4  -9  10     1.96   -40.00   131.00      5 <
  -4  -8   6   187.24   287.10   142.90      5 <
  -4  -7   2    60.66   277.50   152.50      5 <
  -4  -6  -2    73.64   -16.90   141.90      5 <
  -4  -5  -6    66.10   149.20   140.50      5 <
  -4  -4 -10   117.09     2.50   133.60      5 <
  -4  -3 -14     5.61    -1.10   138.80      5 <
  -4  -2 -18    72.23   130.30   135.90      5 <
  -4  -1 -22     3.84   -24.90   128.00      5 <
  -4  -1 -21    12.76    -1.80   127.20      5 <
  -4   0 -26    20.97   -18.10   129.30      5 <
  -4   0 -25     1.10    51.70   127.40      5 <
  -4   1 -29     1.00   -43.00   125.20      5 <
  -4   1 -28     0.24    81.00   131.70      5 <
  -3 -10  21     7.45    32.70   137.40      5 <
  -3  -9  16    22.27    47.00   132.20      5 <
  -3  -9  17     8.81   -35.60   135.40      5 <
  -3  -8  12     4.39   -10.90   139.10      5 <
  -3  -8  13   105.07   102.50   138.10      5 <
  -3  -7   8     5.46   -72.90   139.00      5 <
  -3  -6   4   250.38   412.40   176.00      5 <
  -3  -5   0  1608.90  1499.60   178.50      5 o
  -3  -4  -4  2296.40  1774.60   213.30      5 o
  -3  -3  -8   100.35    41.80   146.70      5 <
  -3  -2 -12   198.18    97.60   163.50      5 <
  -3  -1 -15     5.96   -26.00   133.80      5 <
  -3   0 -19     7.65   -50.50   144.50      5 <
  -3   1 -23     7.80   -27.10   128.30      5 <
  -3   2 -27     3.83    -8.60   112.10      5 <
  -3   2 -26     6.58     0.50   128.50      5 <
  -3   3 -30     1.08    -0.50   125.90      5 <
  -2  -9  23     1.72   -24.80   131.20      5 <
  -2  -8  19    19.42   106.10   137.40      5 <
  -2  -8  20     0.93    12.10   137.80      5 <
  -2  -7  15    36.36    43.10   172.10      5 <
  -2  -6  11    36.06    52.10   166.00      5 <
  -2  -5   7   207.12   154.90   188.10      5 <
  -2  -2  -5  8447.90 10096.30   304.50      5 o
  -2  -1  -9   699.78   613.30   191.40      5 o
  -2   0 -13    48.71    36.80   138.30      5 <
  -2   1 -17   949.61   474.20   184.90      5 <
  -2   2 -21    63.57   179.70   157.10      5 <
  -2   2 -20   642.05  1447.90   153.40      5 o
  -2   3 -24     6.71   -12.60   123.40      5 <
  -2   4 -28    25.03    33.30   126.30      5 <
  -2   4 -27    16.21   -11.40   123.80      5 <
  -1  -7  22    18.88    -1.60   135.70      5 <
  -1  -6  18    41.87   -17.60   133.30      5 <
  -1  -5  14    40.99    -1.70   112.10      5 <
  -1   2 -14    64.06    99.00   140.90      5 <
  -1   3 -18    10.21   -24.70   112.10      5 <
  -1   4 -22     4.01     3.40   135.20      5 <
  -1   5 -26     2.53    33.00   133.90      5 <
  -1   5 -25     1.53   -42.40   132.70      5 <
  -1   6 -29     0.22    22.80   130.30      5 <
   0  -5  20     2.66     8.50   132.40      5 <
   0  -5  21     6.26     0.30   112.10      5 <
   0  -4  16    14.86    26.80   139.80      5 <
   0  -3  12  1811.20  1658.90   209.40      5 o
   0  -2   8  7642.00  7996.90   279.10      5 o
   0  -1   4  2394.60  2088.30   314.80      5 o
   0   1  -4  2286.90  1922.30   311.50      5 o
   0   2  -8  8946.40  8748.50   267.30      5 o
   0   4 -15    12.92   113.90   144.50      5 <
   0   5 -19    17.68     4.70   143.20      5 <
   0   6 -23   180.56   157.00   138.70      5 <
   0   7 -27   100.83    -7.60   126.40      5 <
   0   7 -26    14.72   -17.60   128.00      5 <
   1  -4  23     2.16   -21.40   134.10      5 <
   1  -4  24     0.42   -15.40   128.40      5 <
   1  -3  19    65.68    12.70   137.40      5 <
   1  -2  15    99.06   -32.20   151.10      5 <
   1  -1  11    50.06    45.70   172.50      5 <
   1   0   7   192.56   417.10   228.00      5 <
   1   3  -5  1736.90  1270.90   242.20      5 o
   1   4  -9    32.57  -100.00   164.80      5 <
   1   5 -13   185.61   179.90   158.80      5 <
   1   6 -17   141.55   139.90   137.90      5 <
   1   6 -16     6.87    39.90   140.60      5 <
   1   7 -20     4.49   -37.20   137.00      5 <
   1   8 -24     1.65   -25.30   127.50      5 <
   1   9 -28     2.08    -0.90   121.40      5 <
   1   9 -27     1.10    30.10   131.00      5 <
   2  -2  22     3.47   -34.40   139.80      5 <
   2  -1  18    41.73    63.80   173.10      5 <
   2   0  14    14.61   -38.50   172.60      5 <
   2   5  -6   474.93   445.10   182.90      5 <
   2   6 -10   440.39   650.50   155.40      5 o
   2   7 -14   165.82   223.20   146.10      5 <
   2   8 -18     9.34   -44.20   134.40      5 <
   2   8 -17     3.87   110.70   133.70      5 <
   2   9 -21     0.70   -10.40   112.10      5 <
   2  10 -25     2.61   123.80   131.60      5 <
   2  10 -24    25.94    -5.00   126.70      5 <
   2  11 -28     2.05   -16.80   127.00      5 <
   3   0  21    65.83   163.40   135.70      5 <
   3   1  17    30.13    22.20   140.60      5 <
   3   2  13   153.61   114.80   160.30      5 <
   3   7  -7    14.40   198.50   143.00      5 <
   3   8 -11    34.29   -17.90   130.30      5 <
   3   9 -15    57.44    21.80   136.60      5 <
   3  10 -19     1.41     0.60   112.10      5 <
   3  10 -18     0.24   106.30   129.70      5 <
   3  11 -22     1.26     4.70   128.70      5 <
   3  12 -26     1.52    -3.50   112.10      5 <
   3  12 -25     6.97    -7.00   124.50      5 <
   4   1  24     1.21    -8.70   112.10      5 <
   4   2  19    21.11    -3.70   130.50      5 <
   4   2  20    86.62    17.40   126.90      5 <
   4   3  15    23.93   100.30   132.20      5 <
   4   3  16   218.17   519.70   141.50      5 o
   4   4  11    25.30   -17.70   133.10      5 <
   4   4  12    71.51   126.30   136.80      5 <
   4   5   7   210.73    33.00   141.00      5 <
   4   6   3   157.55    63.30   143.80      5 <
   4   7  -1     6.97    71.70   144.00      5 <
   4   8  -5     3.62   -27.70   137.10      5 <
   4   8  -4    62.57   126.70   137.10      5 <
   4   9  -8     1.71     4.10   146.30      5 <
   4  10 -12     5.94    43.80   139.50      5 <
   4  11 -16    19.66    21.00   136.00      5 <
   4  12 -20     2.13    -0.50   126.70      5 <
   4  12 -19     0.21    -2.10   127.10      5 <
   4  13 -23     0.60   -22.10   127.30      5 <
   5   3  22    99.40     8.80   132.80      5 <
   5   3  23    15.19   130.90   133.20      5 <
   5   4  18     6.79     3.50   130.00      5 <
   5   4  19    27.70    58.60   129.30      5 <
   5   5  14    38.46    10.90   134.70      5 <
   5   5  15     2.30   -32.50   129.00      5 <
   5   6  10    88.65    11.20   140.10      5 <
   5   6  11    66.14   124.50   140.80      5 <
   5   7   6   372.93   248.90   141.60      5 <
   5   8   2    12.54    33.00   141.20      5 <
   5   8   3   335.43   174.80   144.40      5 <
   5   9  -2    92.10    40.90   146.50      5 <
   5   9  -1   321.72   371.60   147.60      5 <
   5  10  -6    53.40     4.10   128.60      5 <
   5  10  -5   290.35    45.50   134.30      5 <
   5  11  -9   138.04   101.30   129.80      5 <
   5  12 -13     0.96   -21.00   128.80      5 <
   5  13 -17     1.13    -8.90   128.80      5 <
   5  13 -16    11.79    12.40   132.20      5 <
   5  14 -20     0.12   -29.90   127.50      5 <
   6   4  25     3.08   -20.30   126.60      5 <
   6   5  21     0.25   145.70   130.80      5 <
   6   5  22     4.29   -15.30   129.90      5 <
   6   6  17     0.53    -9.10   128.10      5 <
   6   6  18     3.58     1.50   134.00      5 <
   6   7  13     6.76   -15.20   134.10      5 <
   6   7  14     1.79    -4.70   128.30      5 <
   6   8   9     0.60   -33.30   133.20      5 <
   6   8  10    64.59   105.50   130.70      5 <
   6   9   5     3.77    84.10   131.70      5 <
   6   9   6    13.83    61.90   134.70      5 <
   6  10   1    12.79    31.30   138.90      5 <
   6  10   2     4.98   -31.70   136.30      5 <
   6  11  -3     7.23    28.50   135.10      5 <
   6  11  -2     2.52    12.60   136.60      5 <
   6  12  -7     0.45    19.30   137.10      5 <
   6  12  -6     1.32     1.50   131.10      5 <
   6  13 -10     3.31    13.40   135.00      5 <
   6  14 -14     1.11   -17.10   132.20      5 <
   6  14 -13     0.11    75.90   131.50      5 <
   7   7  20     4.67   -39.30   132.50      5 <
   7   8  16     0.26    65.70   138.90      5 <
   7   8  17     0.23    40.80   141.40      5 <
   7   9  12     0.64     0.10   138.10      5 <
   7   9  13     3.96    23.30   139.30      5 <
   7  10   8     8.28    55.50   136.70      5 <
   7  10   9     8.25   -11.10   134.30      5 <
   7  11   4     0.31    33.20   140.70      5 <
   7  11   5     1.52   -21.90   141.10      5 <
  -7  -7 -17     0.93   -44.60   132.70      6 <
  -7  -7 -16     2.72   -34.80   129.50      6 <
  -7  -6 -21     0.31    -2.30   133.40      6 <
  -7  -6 -20     2.72   -38.40   134.80      6 <
  -6 -13  15     3.33   -31.60   140.00      6 <
  -6 -13  16    11.66    24.20   141.50      6 <
  -6 -13  17    22.16   -11.00   134.10      6 <
  -6 -12  11     0.33    45.80   147.50      6 <
  -6 -12  12     2.51    17.60   144.90      6 <
  -6 -11   6     9.70    33.20   140.40      6 <
  -6 -11   7    30.76   -57.50   141.00      6 <
  -6 -10   2     7.44   -11.80   133.70      6 <
  -6 -10   3     3.10     1.40   135.60      6 <
  -6  -9  -2     4.07    78.80   137.00      6 <
  -6  -8  -6     4.60   -45.00   136.10      6 <
  -6  -7 -11     7.19   -23.90   131.60      6 <
  -6  -7 -10     1.04    20.30   128.80      6 <
  -6  -6 -15    42.90   -11.10   132.80      6 <
  -6  -6 -14     6.48   -57.70   130.30      6 <
  -6  -5 -19     6.46    -7.30   112.10      6 <
  -6  -5 -18    11.03   -23.20   128.40      6 <
  -6  -4 -23     0.58   -15.60   129.10      6 <
  -6  -4 -22     3.62    33.70   131.70      6 <
  -5 -12  18    16.81    51.70   132.80      6 <
  -5 -12  19     1.97   -16.80   132.90      6 <
  -5 -11  13    18.67   -27.40   131.50      6 <
  -5 -11  14    17.16   108.20   134.80      6 <
  -5 -10   9    19.18    31.60   131.70      6 <
  -5 -10  10    17.00    -6.30   131.30      6 <
  -5  -9   5     8.95   142.90   134.70      6 <
  -5  -8   1     3.93    -0.90   112.10      6 <
  -5  -7  -4   271.66   252.00   139.70      6 <
  -5  -6  -8   639.51   -46.70   112.10      6 <
  -5  -5 -12   372.40    24.40   131.50      6 <
  -5  -4 -17     3.70   137.10   131.40      6 <
  -5  -4 -16    74.87    -5.50   112.10      6 <
  -5  -3 -21    13.10   -10.10   126.60      6 <
  -5  -3 -20    22.81    85.30   127.60      6 <
  -5  -2 -25    20.94   -21.90   119.80      6 <
  -5  -2 -24     0.33    -3.00   124.90      6 <
  -5  -1 -28     1.26     5.20   125.40      6 <
  -4 -11  20     0.62    52.80   129.40      6 <
  -4 -11  21     6.96    44.30   125.00      6 <
  -4 -10  16     3.71   -28.60   128.40      6 <
  -4 -10  17     5.58    -1.40   112.10      6 <
  -4  -9  11     9.36     9.20   125.50      6 <
  -4  -9  12     7.07    -6.00   130.60      6 <
  -4  -8   7   140.00   -15.00   133.30      6 <
  -4  -7   3   169.87    -4.90   138.30      6 <
  -4  -6  -2   109.12   114.00   132.90      6 <
  -4  -6  -1    28.85   -39.50   134.80      6 <
  -4  -5  -6    70.06    -4.40   112.10      6 <
  -4  -4 -10   114.31    -3.20   112.10      6 <
  -4  -3 -14    12.57   -17.20   128.90      6 <
  -4  -2 -18    88.04   -32.70   128.70      6 <
  -4  -1 -22     4.25    -1.50   112.10      6 <
  -4   0 -26    21.87    50.00   123.30      6 <
  -4   1 -30     0.32    -3.70   112.10      6 <
  -4   1 -29     1.73   -17.10   122.80      6 <
  -3 -10  23    35.50   -14.20   127.20      6 <
  -3  -9  18    10.27    -5.70   129.20      6 <
  -3  -9  19     5.13    61.40   138.10      6 <
  -3  -8  14     1.19   -36.90   138.00      6 <
  -3  -7  10   315.26   125.00   141.40      6 <
  -3  -6   5   431.79   -18.90   144.10      6 <
  -3  -5   1    11.09   -33.70   173.10      6 <
  -3  -4  -3   266.84   163.90   187.80      6 <
  -3  -2 -12   255.33    -1.30   149.70      6 <
  -3  -1 -16     6.36    -9.10   133.30      6 <
  -3   0 -20     5.04    37.50   132.40      6 <
  -3   1 -24    70.13    57.70   128.90      6 <
  -3   1 -23    14.18    58.60   129.30      6 <
  -3   2 -28     2.05    47.60   125.00      6 <
  -3   2 -27     5.41    -2.20   112.10      6 <
  -2  -8  21    34.15     2.10   127.20      6 <
  -2  -8  22    48.20   -29.90   122.20      6 <
  -2  -7  17   460.80    45.80   148.70      6 <
  -2  -6  12    81.29    -5.60   112.10      6 <
  -2  -5   8    34.01   -40.10   158.40      6 <
  -2  -3  -1   863.61   865.40   220.80      6 o
  -2  -2  -5  8760.60  5823.90   274.30      6 o
  -2  -1  -9   875.51   790.40   183.40      6 o
  -2   0 -13    66.14    13.80   130.20      6 <
  -2   1 -17  1199.20  1006.10   147.00      6 o
  -2   2 -22     1.17   -12.30   128.20      6 <
  -2   2 -21    76.38    -3.00   153.50      6 <
  -2   3 -26    45.82     2.70   122.00      6 <
  -2   3 -25     3.57    20.70   127.00      6 <
  -2   4 -30     0.80    27.90   124.40      6 <
  -2   4 -29     1.56   -20.60   121.70      6 <
  -1  -6  19     1.33    38.20   126.50      6 <
  -1  -6  20     2.85    -0.80   128.90      6 <
  -1  -5  15     3.74    52.70   134.30      6 <
  -1  -3   6     4.40   237.70   214.80      6 <
  -1   0  -7   277.94  -100.00   208.80      6 <
  -1   1 -11    75.38   105.60   162.90      6 <
  -1   2 -15   103.10    12.90   154.80      6 <
  -1   3 -19    79.04    -1.00   135.20      6 <
  -1   4 -23     2.39   117.60   137.10      6 <
  -1   5 -27     1.90   -19.30   127.40      6 <
  -1   5 -26     2.23    27.30   126.70      6 <
   0  -5  22     5.50   -26.80   122.60      6 <
   0  -5  23    89.55   -17.80   128.30      6 <
   0  -4  18    41.34   -24.80   130.00      6 <
   0  -3  13  2186.70   920.90   186.00      6 o
   0   4 -17    15.38   100.80   135.40      6 <
   0   4 -16    17.21    43.60   133.20      6 <
   0   5 -21     9.00    33.60   132.70      6 <
   0   5 -20     5.79    57.20   137.80      6 <
   0   6 -25    66.53   -29.90   122.90      6 <
   0   6 -24    28.26    -2.90   112.10      6 <
   0   7 -29     2.20   -22.80   123.70      6 <
   0   7 -28     3.53   -25.90   123.70      6 <
   1  -3  20    28.81    -3.10   124.60      6 <
   1  -3  21    14.09   -17.90   130.20      6 <
   1  -2  16   428.47   185.10   134.60      6 <
   1   0   7   251.40   383.20   223.20      6 <
   1   3  -6     5.74   557.80   232.50      6 <
   1   4 -10    29.65    19.70   164.40      6 <
   1   5 -14    42.25   127.80   145.50      6 <
   1   6 -18    51.96   -11.10   136.30      6 <
   1   7 -22    24.26     4.50   126.50      6 <
   1   8 -26     1.99   -12.70   125.70      6 <
   1   8 -25     0.51    37.40   126.20      6 <
   1   9 -29     0.71    62.10   126.20      6 <
   2  -2  23    48.28    11.20   128.80      6 <
   2  -2  24     5.52    14.90   126.80      6 <
   2  -1  19   192.64   187.70   141.70      6 <
   2   0  14     8.23    -7.30   147.80      6 <
   2   1  10   662.10   195.30   170.30      6 <
   2   3   1   892.09  1245.60   257.40      6 o
   2   4  -3  1025.30   556.40   190.20      6 <
   2   5  -7   235.99   137.20   171.20      6 <
   2   6 -11    42.31    49.40   166.00      6 <
   2   7 -15    47.13   -30.00   135.10      6 <
   2   8 -20     1.32    10.70   127.90      6 <
   2   8 -19    23.97    25.10   130.30      6 <
   2   9 -24     0.94    -2.40   112.10      6 <
   2   9 -23     1.54   -14.40   128.80      6 <
   2  10 -27     0.11    41.00   125.40      6 <
   3   0  21    95.34   -14.70   112.10      6 <
   3   0  22     7.73   -23.20   126.00      6 <
   3   1  17    39.79   -24.60   129.50      6 <
   3   2  13   197.40     6.80   137.90      6 <
   3   3   8   119.58    11.80   141.50      6 <
   3   4   4  2954.00   793.30   202.50      6 o
   3   5   0  2115.30  1239.80   170.70      6 o
   3   7  -9   119.49    86.20   135.30      6 <
   3   8 -13   115.20   118.20   133.20      6 <
   3   9 -17    11.23   -11.90   128.50      6 <
   3   9 -16    28.09    -7.80   130.60      6 <
   3  10 -21     9.09    32.80   127.40      6 <
   3  10 -20     0.33   -16.90   126.20      6 <
   3  11 -25     5.98    44.60   124.10      6 <
   3  11 -24     4.03   -19.90   119.90      6 <
   4   1  24     1.77   -17.10   122.80      6 <
   4   1  25     1.77    57.10   123.60      6 <
   4   2  20    97.17    69.60   130.60      6 <
   4   2  21     7.70    57.00   130.50      6 <
   4   3  15    31.89    47.40   129.50      6 <
   4   3  16   275.68   137.80   136.70      6 <
   4   4  11    25.75   -22.90   136.10      6 <
   4   5   7   225.53     7.00   139.50      6 <
   4   6   2   110.48   243.60   138.80      6 <
   4   6   3   212.23    67.10   141.30      6 <
   4   7  -2    71.33   242.30   141.50      6 <
   4   8  -6   232.61   317.20   136.40      6 <
   4   9 -10     4.38   -28.60   135.70      6 <
   4  10 -14     4.24   -22.10   129.90      6 <
   4  11 -18     1.50    -2.10   112.10      6 <
   4  12 -22     4.10   130.90   123.90      6 <
   4  12 -21     1.02   143.80   125.70      6 <
   5   3  23    22.95   -11.10   124.30      6 <
   5   3  24    17.49   -10.30   125.70      6 <
   5   4  18     9.48   -20.00   120.80      6 <
   5   4  19    44.37   -15.40   125.70      6 <
   5   5  14    50.51    86.80   133.60      6 <
   5   6  10   100.22    -5.20   124.60      6 <
   5   7   5    59.35    29.70   132.00      6 <
   5   7   6   521.38   234.80   139.10      6 <
   5   8   1     7.74   -20.30   133.90      6 <
   5   9  -3    15.50   -24.70   132.40      6 <
   5  10  -7    20.44    74.20   129.20      6 <
   5  11 -11   138.43    73.70   132.10      6 <
   5  12 -16     6.81    53.00   129.10      6 <
   5  12 -15    10.84   168.10   127.90      6 <
   5  13 -20     2.40     0.30   121.70      6 <
   5  13 -19    10.52   -12.70   112.10      6 <
   6   5  21     0.85   -21.70   124.70      6 <
   6   5  22     4.04   -19.90   129.60      6 <
   6   6  17     0.44    14.90   132.10      6 <
   6   6  18     2.88    -8.90   127.00      6 <
   6   7  12     3.66   -12.90   112.10      6 <
   6   7  13     4.61   -10.60   112.10      6 <
   6   8   8     2.17    19.20   133.20      6 <
   6   8   9     0.37    35.50   130.10      6 <
   6   9   4    31.14   -21.30   132.00      6 <
   6  10   0   382.64   147.90   131.80      6 <
   6  11  -5     5.17   -32.30   125.20      6 <
   6  11  -4     1.51   -16.60   130.20      6 <
   6  12  -9     0.21    73.60   126.90      6 <
   6  12  -8     6.43    78.50   131.30      6 <
   6  13 -13     0.70    83.20   132.20      6 <
   6  13 -12     0.60   -21.30   128.20      6 <
   6  14 -16     0.19    10.90   127.50      6 <
   7   7  20     6.04     2.30   129.30      6 <
   7   8  15    66.74     9.50   134.70      6 <
   7   8  16     0.62    30.40   133.40      6 <
   7   9  11     0.35    -3.80   139.20      6 <
   7   9  12     1.45   -13.70   129.20      6 <
   7  10   7     6.92    19.50   134.10      6 <
   7  10   8    11.91   -19.30   132.60      6 <
   7  11   2    30.82     9.60   129.60      6 <
   7  11   3     3.35    13.80   131.00      6 <
   7  12  -2     1.58   -21.60   125.50      6 <
  -7  -7 -17     0.37     0.90   134.90      7 <
  -7  -7 -16     1.65   -65.20   137.60      7 <
  -7  -6 -21     3.94   -55.00   132.60      7 <
  -7  -6 -20     3.47     6.50   133.00      7 <
  -6 -13  16     8.92   130.10   147.70      7 <
  -6 -13  17     8.32   -14.10   145.20      7 <
  -6 -12  11     0.21    52.90   140.70      7 <
  -6 -12  12     2.25    -0.50   143.90      7 <
  -6 -11   7    11.60    82.30   138.60      7 <
  -6 -11   8     1.89   -39.10   141.80      7 <
  -6 -10   2     5.89   -37.30   139.50      7 <
  -6 -10   3     3.24    32.10   142.10      7 <
  -6  -9  -2     7.09     8.60   138.80      7 <
  -6  -9  -1     5.96    19.00   142.40      7 <
  -6  -8  -6     1.52   159.10   143.10      7 <
  -6  -7 -10     2.59   -25.80   137.30      7 <
  -6  -6 -14     2.70   -31.20   131.40      7 <
  -6  -5 -18    19.36   -16.40   136.70      7 <
  -6  -4 -22     1.82   -11.70   112.10      7 <
  -5 -12  18     5.90    -0.20   112.10      7 <
  -5 -12  19     1.91    16.40   141.90      7 <
  -5 -11  14    13.62   -14.90   140.00      7 <
  -5 -10   9    10.91    56.40   143.70      7 <
  -5 -10  10    14.31   116.20   133.20      7 <
  -5  -9   5    17.11   156.30   138.30      7 <
  -5  -8   1     5.55     7.20   131.70      7 <
  -5  -7  -4   120.17    64.20   133.70      7 <
  -5  -7  -3     5.02    -9.90   137.20      7 <
  -5  -6  -8   292.06    -4.80   112.10      7 <
  -5  -5 -12   156.47   -25.80   139.60      7 <
  -5  -4 -16    21.83   114.10   134.10      7 <
  -5  -3 -20    17.60   -22.30   130.50      7 <
  -5  -2 -24     5.44     5.50   122.30      7 <
  -5  -1 -28     1.74   -34.80   125.50      7 <
  -5  -1 -27     2.50    51.00   128.10      7 <
  -4 -11  20     3.00   -47.80   126.80      7 <
  -4 -11  21     1.92   191.70   138.80      7 <
  -4 -11  22     0.56    20.20   135.90      7 <
  -4 -10  16     1.48    -2.80   128.40      7 <
  -4 -10  17     6.53   108.60   133.50      7 <
  -4  -9  12     7.61    72.10   134.20      7 <
  -4  -8   7    53.74     1.60   130.90      7 <
  -4  -8   8    15.04    84.10   134.40      7 <
  -4  -7   3    81.56    17.50   138.60      7 <
  -4  -6  -1     8.69    55.70   131.40      7 <
  -4  -5  -6    80.59   -31.40   129.20      7 <
  -4  -5  -5     4.47   -17.40   140.10      7 <
  -4  -4 -10    34.71    47.30   135.50      7 <
  -4  -3 -14    33.23    -0.20   133.60      7 <
  -4  -2 -18    68.02    62.80   131.20      7 <
  -4  -1 -22    10.30    68.10   130.60      7 <
  -4  -1 -21    39.15   -12.30   125.60      7 <
  -4   0 -26    22.56   -22.20   126.80      7 <
  -4   0 -25     5.13    20.80   127.90      7 <
  -4   1 -30     0.38   -27.40   123.00      7 <
  -4   1 -29     4.05   -23.30   124.30      7 <
  -3 -10  23    11.90   -18.50   129.30      7 <
  -3  -9  19     4.67    15.10   129.50      7 <
  -3  -8  14     1.92   -12.90   132.40      7 <
  -3  -8  15   280.70    29.00   137.90      7 <
  -3  -7  10   190.03   -27.00   129.90      7 <
  -3  -6   5   246.99   107.60   147.70      7 <
  -3  -5   1    11.59    98.10   159.50      7 <
  -3  -4  -3   121.90   208.00   192.10      7 <
  -3  -3  -7   119.65    -0.80   143.40      7 <
  -3  -2 -11   487.82   453.80   147.90      7 o
  -3  -1 -16     7.09    78.20   137.20      7 <
  -3  -1 -15    27.24    56.60   130.70      7 <
  -3   0 -20     6.35   -25.90   132.80      7 <
  -3   0 -19     6.10    -9.20   135.20      7 <
  -3   1 -24    39.03     9.80   128.00      7 <
  -3   1 -23    15.40    64.50   129.10      7 <
  -3   2 -28     1.23    63.90   126.90      7 <
  -3   2 -27     2.29   -28.10   127.70      7 <
  -2  -8  21    13.63   -24.60   133.40      7 <
  -2  -8  22    36.04   -57.40   129.00      7 <
  -2  -7  17   195.17    10.20   142.40      7 <
  -2  -6  12    34.08   -61.00   132.40      7 <
  -2  -5   8    14.32   124.60   152.40      7 <
  -2  -3  -1   700.78   593.00   222.00      7 <
  -2  -2  -5  3451.60  3795.60   239.00      7 o
  -2  -1  -9   348.46   567.20   179.40      7 o
  -2   0 -13   109.79   -10.10   135.10      7 <
  -2   1 -17   670.00  1374.30   151.70      7 o
  -2   2 -21    45.84   -13.90   137.30      7 <
  -2   3 -25    18.99    -8.40   131.70      7 <
  -2   4 -29     1.56   -34.10   125.50      7 <
  -2   4 -28    17.11    12.10   132.40      7 <
  -1  -6  19     2.08   -47.90   132.50      7 <
  -1  -6  20    14.45   134.70   134.40      7 <
  -1  -5  15     8.92   185.80   137.30      7 <
  -1  -3   6     7.56   258.50   218.80      7 <
  -1   1 -11    69.51   -17.30   157.10      7 <
  -1   2 -15    56.45   100.20   141.20      7 <
  -1   3 -19    63.60   -23.90   134.00      7 <
  -1   4 -23     4.39   107.30   131.00      7 <
  -1   5 -27     4.24   -25.50   125.80      7 <
  -1   5 -26     1.70   -13.10   128.00      7 <
   0  -5  22     1.87   -27.80   124.50      7 <
   0  -4  17    18.99   -37.50   132.60      7 <
   0  -4  18    14.59    -6.90   134.20      7 <
   0  -3  13  1102.50   726.10   164.00      7 o
   0   3 -12  1413.80  1326.10   180.70      7 o
   0   4 -16    14.68   -28.00   135.20      7 <
   0   5 -20     2.49    -9.00   138.10      7 <
   0   6 -24    15.74   -17.10   129.50      7 <
   0   7 -28     0.58    -4.40   124.30      7 <
   1  -3  20    24.94    71.80   133.90      7 <
   1  -3  21    15.21   -19.00   138.90      7 <
   1  -2  16   201.25   -30.80   135.00      7 <
   1  -1  11    77.37   103.90   164.40      7 <
   1   0   7   452.94    17.60   211.00      7 <
   1   3  -6     9.06    18.00   209.30      7 <
   1   4 -10    15.96    34.60   159.00      7 <
   1   5 -14    17.74   -22.20   136.40      7 <
   1   6 -18    18.05    19.90   133.20      7 <
   1   7 -22    11.77     8.70   129.20      7 <
   1   8 -26     2.50   -17.80   122.80      7 <
   1   8 -25     3.84    -5.60   112.10      7 <
   1   9 -29     1.09   -22.00   122.10      7 <
   2  -2  23    28.43    74.30   134.40      7 <
   2  -1  18    52.37   276.40   136.30      7 <
   2  -1  19    86.82    -2.20   133.70      7 <
   2   0  14     9.09    -4.40   143.70      7 <
   2   2   5  3974.40  4074.50   246.90      7 o
   2   3   1   509.44   809.40   213.50      7 o
   2   4  -3   588.99   669.30   194.30      7 o
   2   5  -7   179.86   293.20   168.10      7 <
   2   6 -11    28.02   -43.00   129.40      7 <
   2   7 -15    55.20   137.70   134.00      7 <
   2   8 -20     6.99   -28.10   122.90      7 <
   2   8 -19     6.88   -19.30   134.30      7 <
   2   9 -23     1.32    99.20   125.80      7 <
   2  10 -27     0.15    35.90   129.00      7 <
   3   0  21    72.48    34.70   129.50      7 <
   3   0  22     5.43    13.40   131.30      7 <
   3   1  17    47.46   -18.70   133.10      7 <
   3   2  12   143.73   -28.90   136.50      7 <
   3   3   8   146.71    75.60   136.00      7 <
   3   4   4  1331.20  1348.50   165.30      7 o
   3   6  -5   199.57    91.70   156.10      7 <
   3   7  -9    71.36   104.20   142.10      7 <
   3   8 -13    59.08    98.30   131.70      7 <
   3   9 -17     4.09    34.30   127.90      7 <
   3  10 -21     6.47    20.00   128.60      7 <
   3  10 -20     0.57   -19.70   125.10      7 <
   3  11 -25     8.24    26.20   127.20      7 <
   3  11 -24     1.42    -8.30   130.00      7 <
   4   1  24     1.23   101.20   130.60      7 <
   4   1  25     3.36    34.60   125.10      7 <
   4   2  19     9.45   -24.00   131.50      7 <
   4   2  20    48.40   -29.90   132.00      7 <
   4   3  15    56.09   -26.00   129.10      7 <
   4   4  11    10.67   -13.30   135.40      7 <
   4   5   6    89.93    90.50   139.30      7 <
   4   5   7   114.69     4.10   145.80      7 <
   4   6   2    90.25   -49.80   134.90      7 <
   4   7  -2    67.39   126.60   134.20      7 <
   4   8  -6    87.07    95.20   135.80      7 <
   4   9 -10     7.16   -33.10   133.30      7 <
   4  10 -14     9.05    56.00   125.20      7 <
   4  11 -18     2.52    13.20   125.30      7 <
   4  12 -22     2.75   -11.40   130.90      7 <
   4  12 -21     0.64   -12.60   126.60      7 <
   5   3  22    93.79   -23.00   129.00      7 <
   5   3  23    10.41    48.30   135.00      7 <
   5   4  18     3.34   121.80   130.90      7 <
   5   4  19    34.92    -3.30   129.70      7 <
   5   5  13   125.62     5.90   135.40      7 <
   5   5  14    21.89   102.70   132.70      7 <
   5   6   9    43.07   -62.80   127.90      7 <
   5   6  10    50.44    32.70   132.40      7 <
   5   7   5    65.60   150.90   132.60      7 <
   5   8   1    26.81    -0.30   112.10      7 <
   5   9  -4    44.94    78.00   130.50      7 <
   5   9  -3    24.17   -11.30   145.00      7 <
   5  10  -8    56.97    96.90   134.40      7 <
   5  10  -7    23.56    94.50   130.60      7 <
   5  11 -12    36.19   -28.00   123.40      7 <
   5  11 -11   118.18   149.70   132.40      7 <
   5  12 -16     2.80     8.90   129.10      7 <
   5  12 -15    10.38    -8.40   130.20      7 <
   5  13 -20     2.25   -21.90   124.30      7 <
   5  13 -19     1.17    -9.50   112.10      7 <
   6   4  25     1.40    37.80   124.50      7 <
   6   5  21     1.72    54.40   131.10      7 <
   6   5  22     6.48    -4.00   112.10      7 <
   6   6  16     1.93    84.30   131.70      7 <
   6   6  17     3.47    45.40   128.50      7 <
   6   7  12     6.97    25.90   130.40      7 <
   6   7  13    13.89   -27.00   131.30      7 <
   6   8   8     7.76    59.20   133.60      7 <
   6   9   3     3.08   -17.50   137.10      7 <
   6   9   4    22.02   -24.30   135.00      7 <
   6  10  -1     9.92   -29.70   134.10      7 <
   6  10   0   219.95   213.90   136.80      7 <
   6  11  -5     2.55   -16.40   131.00      7 <
   6  11  -4     2.94    70.70   132.20      7 <
   6  12  -9     0.62   -35.40   130.60      7 <
   6  12  -8     5.69    36.10   128.40      7 <
   6  13 -13     1.69   -37.50   133.40      7 <
   6  13 -12     0.98   -16.10   136.60      7 <
   6  14 -16     0.51   -43.00   137.10      7 <
   7   7  19     2.83    60.00   137.50      7 <
   7   7  20    12.88    12.90   131.80      7 <
   7   8  15    60.71    43.80   140.50      7 <
   7   8  16     0.95    68.10   133.30      7 <
   7   9  10     8.31    -7.20   130.40      7 <
   7   9  11     0.68   -10.00   134.20      7 <
   7  10   6    23.08   -47.40   136.80      7 <
   7  10   7     2.72   -19.90   137.20      7 <
   7  11   2    16.43    83.90   142.90      7 <
   7  11   3     5.19    93.20   141.60      7 <
   7  12  -2     1.02    -2.40   112.10      7 <
  -7  -7 -17     1.87   -41.40   140.20      8 <
  -7  -7 -16     3.54   -50.10   138.70      8 <
  -7  -6 -21     1.07   -69.90   138.70      8 <
  -7  -6 -20     1.65    11.00   138.30      8 <
  -6 -13  18     1.33    16.70   144.30      8 <
  -6 -12  14     1.92    -5.50   146.70      8 <
  -6 -12  15     8.69    63.10   141.30      8 <
  -6 -11   9     8.14   109.30   145.30      8 <
  -6 -11  10     4.05   263.80   146.50      8 <
  -6 -10   4     9.23   101.30   143.90      8 <
  -6 -10   5    27.67   -16.50   112.10      8 <
  -6  -9  -1     3.09   -27.20   137.10      8 <
  -6  -8  -5    12.77   116.30   147.10      8 <
  -6  -7 -10     4.24   -22.10   138.30      8 <
  -6  -7  -9    68.63   103.40   139.70      8 <
  -6  -6 -14     8.66   141.10   132.90      8 <
  -6  -5 -19     5.54    57.10   134.20      8 <
  -6  -5 -18    12.00   -10.40   133.20      8 <
  -6  -4 -23     0.56    20.70   134.10      8 <
  -6  -4 -22     4.43    19.00   132.10      8 <
  -5 -12  21     0.91     0.20   135.10      8 <
  -5 -12  22     0.93   -56.00   135.40      8 <
  -5 -11  16     1.46    34.90   134.50      8 <
  -5 -11  17    18.79   -47.10   134.10      8 <
  -5 -10  11     9.51    63.20   141.20      8 <
  -5 -10  12     2.35   -53.90   132.20      8 <
  -5  -9   6     5.55   -33.00   135.70      8 <
  -5  -9   7    82.81   104.90   141.80      8 <
  -5  -8   2    73.97    16.20   150.60      8 <
  -5  -7  -3    26.00    -4.00   137.00      8 <
  -5  -6  -8   720.19  1005.50   154.20      8 o
  -5  -6  -7     9.08    14.40   158.60      8 <
  -5  -5 -12   351.96   327.60   167.20      8 <
  -5  -4 -17     7.65    -9.40   129.90      8 <
  -5  -4 -16    56.50    18.00   137.90      8 <
  -5  -3 -21    12.45    -5.30   129.70      8 <
  -5  -3 -20    18.76    73.40   135.00      8 <
  -5  -2 -25    22.99   -38.70   129.80      8 <
  -5  -2 -24     0.52   -14.90   128.60      8 <
  -5  -1 -28     0.64     9.10   125.90      8 <
  -4 -11  23     1.90   -23.30   124.90      8 <
  -4 -10  18     3.97    71.60   135.80      8 <
  -4 -10  19     7.15    84.30   131.00      8 <
  -4  -9  14     6.78    -4.20   126.20      8 <
  -4  -8   9    28.46    70.40   146.90      8 <
  -4  -7   4    42.66   -58.40   148.70      8 <
  -4  -6  -1    23.32    23.60   150.70      8 <
  -4  -6   0   624.90   448.80   150.80      8 <
  -4  -5  -5     6.25    50.30   167.10      8 <
  -4  -4 -10   106.89    41.10   135.70      8 <
  -4  -3 -14    10.77   -15.70   148.80      8 <
  -4  -2 -19    21.57   -36.40   133.60      8 <
  -4  -2 -18    70.61    85.80   133.70      8 <
  -4  -1 -23     4.83    -1.30   132.10      8 <
  -4  -1 -22    16.69    28.70   127.70      8 <
  -4   0 -27     0.75    -6.40   112.10      8 <
  -4   0 -26    26.61   -26.20   125.40      8 <
  -4   1 -30     0.86    -9.80   129.10      8 <
  -3  -9  21    14.27   -12.20   132.60      8 <
  -3  -9  22     6.10   -38.80   131.20      8 <
  -3  -8  16     7.41     8.30   149.80      8 <
  -3  -8  17    11.71    24.70   134.20      8 <
  -3  -7  11     7.80    13.00   152.10      8 <
  -3  -7  12   840.10   941.00   153.90      8 o
  -3  -6   7  1223.60  1342.50   177.90      8 o
  -3  -5   2   341.82   414.90   167.40      8 <
  -3  -4  -3   195.01   172.90   186.40      8 <
  -3  -3  -7   116.78   246.50   156.60      8 <
  -3  -2 -12   198.83    83.40   174.20      8 <
  -3  -1 -16     2.50   145.90   132.10      8 <
  -3   0 -21    83.31   -22.30   127.10      8 <
  -3   0 -20    12.77   -18.80   130.40      8 <
  -3   1 -25    13.68    -6.30   125.70      8 <
  -3   1 -24   103.40    32.10   124.50      8 <
  -3   2 -29    17.80    75.70   130.40      8 <
  -3   2 -28     2.28     3.60   125.40      8 <
  -2  -8  23     2.31    39.80   136.80      8 <
  -2  -7  19    59.79   197.00   139.20      8 <
  -2  -6  14    17.26     4.40   148.10      8 <
  -2  -5   9   291.30    61.50   141.80      8 <
  -2  -4   4    67.81   153.90   202.90      8 <
  -2  -2  -5  7510.60  6722.00   264.30      8 o
  -2   0 -14     7.33     4.20   170.20      8 <
  -2   1 -18    68.92    23.20   147.80      8 <
  -2   2 -23    35.76   101.60   129.70      8 <
  -2   2 -22     6.41   -26.60   131.10      8 <
  -2   3 -27    19.02    31.80   124.30      8 <
  -2   3 -26    39.70   -29.10   130.40      8 <
  -2   4 -30     1.80   -11.20   128.40      8 <
  -1  -6  21     3.00    23.80   136.60      8 <
  -1  -6  22    14.70     2.30   135.10      8 <
  -1  -5  16   129.27   323.00   141.50      8 <
  -1  -5  17    20.42    12.20   142.10      8 <
  -1  -4  12  1191.60   616.70   176.10      8 o
  -1  -3   7   163.65  -100.00   186.70      8 <
  -1  -2   2  5576.50  5949.10   294.40      8 o
  -1   0  -7   190.65     5.60   233.50      8 <
  -1   2 -16   373.99   475.00   152.20      8 o
  -1   3 -20    24.74   -19.50   125.50      8 <
  -1   4 -25     1.60    17.70   129.40      8 <
  -1   4 -24     0.75   -26.80   135.10      8 <
  -1   5 -29     6.87   -25.50   126.90      8 <
  -1   5 -28     7.05   -52.00   128.10      8 <
   0  -5  24    13.68   -17.20   128.10      8 <
   0  -4  19     8.59    64.50   140.10      8 <
   0  -3  14   199.82   162.20   173.80      8 <
   0   2  -9    93.76   267.60   249.20      8 <
   0   3 -13  2140.20  3011.90   186.60      8 o
   0   4 -18    24.66   -12.90   141.10      8 <
   0   5 -22     5.97   -22.20   135.50      8 <
   0   6 -27     2.34    20.10   127.60      8 <
   0   6 -26     7.65    -4.80   131.80      8 <
   1  -3  22    82.09   210.70   135.30      8 <
   1  -2  17    73.03   139.70   162.70      8 <
   1  -1  12   221.48   -61.20   160.60      8 <
   1   2  -2  5341.90  4587.80   301.10      8 o
   1   4 -11   282.67   283.00   185.10      8 <
   1   5 -15    14.16    51.90   141.50      8 <
   1   6 -20     5.51    38.10   135.10      8 <
   1   6 -19     0.87    38.00   132.40      8 <
   1   7 -24    14.76    -5.70   112.10      8 <
   1   7 -23    41.15    53.30   128.30      8 <
   1   8 -28     0.48    -4.80   129.50      8 <
   1   8 -27     2.74    31.80   127.60      8 <
   2  -2  24     5.23   -24.00   128.40      8 <
   2  -1  19   202.57   317.50   139.80      8 <
   2  -1  20    55.45   -15.90   141.70      8 <
   2   0  15  1154.70   824.80   151.80      8 o
   2   1  10   730.39   475.30   175.20      8 <
   2   2   5  8039.40  7892.10   295.90      8 o
   2   4  -4    73.09   292.70   190.10      8 <
   2   5  -8    28.56   -16.60   149.40      8 <
   2   6 -13     5.10   -16.50   138.40      8 <
   2   7 -17   403.44   598.80   182.90      8 o
   2   8 -22    37.53   -18.30   122.60      8 <
   2   8 -21    23.83   -23.30   125.00      8 <
   2   9 -26     5.35   -20.10   124.80      8 <
   2   9 -25    12.34   -23.70   128.10      8 <
   2  10 -29     1.71    40.80   127.80      8 <
   3   0  22    13.37   -38.90   132.10      8 <
   3   0  23    52.21   122.30   133.50      8 <
   3   1  17    37.56    66.40   129.80      8 <
   3   1  18    13.66    38.00   138.90      8 <
   3   2  13   196.63   111.00   159.80      8 <
   3   3   8   131.74   -37.90   145.90      8 <
   3   4   3   213.52   183.80   199.90      8 <
   3   5  -1    59.05   336.40   155.30      8 <
   3   6  -6   318.44   166.00   167.70      8 <
   3   7 -10   234.86    94.50   146.30      8 <
   3   8 -15   436.28   166.80   133.00      8 <
   3   8 -14     1.04   -23.70   131.10      8 <
   3   9 -19     6.91    -4.80   112.10      8 <
   3   9 -18    19.49   -14.50   129.60      8 <
   3  10 -23    35.12   -29.20   125.50      8 <
   3  11 -27     1.03   -27.20   127.30      8 <
   4   1  25     4.11   -17.80   122.50      8 <
   4   2  20   109.14    46.10   131.90      8 <
   4   2  21     6.89     2.10   129.00      8 <
   4   3  15    21.48   187.90   143.10      8 <
   4   3  16   230.68   411.20   139.80      8 <
   4   4  11    50.57   -10.90   135.60      8 <
   4   5   6    61.91   -33.00   135.80      8 <
   4   6   1    23.23   -33.60   133.70      8 <
   4   6   2    70.30    -0.40   137.40      8 <
   4   7  -3   116.93    68.60   137.40      8 <
   4   8  -8    25.75   -26.40   133.70      8 <
   4   8  -7   136.06    23.20   138.60      8 <
   4   9 -12     7.10   -27.10   128.40      8 <
   4  10 -16     2.95     8.20   127.00      8 <
   4  11 -21     8.57     1.70   123.50      8 <
   4  11 -20     1.64     0.00   112.10      8 <
   4  12 -25     1.72    65.80   131.30      8 <
   4  12 -24     0.79   -28.70   122.20      8 <
   5   3  23    25.81   -18.70   126.20      8 <
   5   3  24    22.86    66.80   125.70      8 <
   5   4  18    22.20    11.40   128.00      8 <
   5   4  19    48.31   -17.40   131.90      8 <
   5   5  13   221.52    33.90   131.00      8 <
   5   5  14    29.75   121.00   134.90      8 <
   5   6   9    64.58    55.20   134.40      8 <
   5   7   4   254.32   181.30   145.80      8 <
   5   7   5    64.44    38.20   159.50      8 <
   5   9  -5    15.84   112.40   135.60      8 <
   5   9  -4     2.33   -16.30   131.20      8 <
   5  10  -9    20.61   -16.40   129.50      8 <
   5  11 -14    14.92    36.00   136.50      8 <
   5  11 -13    27.64   -29.90   133.20      8 <
   5  12 -18    14.41   -30.10   131.60      8 <
   5  12 -17     2.25    62.90   133.90      8 <
   5  13 -21    15.18    40.00   125.40      8 <
   6   5  21     3.34     9.60   129.90      8 <
   6   5  22     3.26   120.00   130.70      8 <
   6   6  16    14.81     7.50   131.00      8 <
   6   6  17     1.67   123.80   128.70      8 <
   6   7  12     3.82   -10.60   134.00      8 <
   6   8   7     5.54   -46.10   131.70      8 <
   6   8   8     0.83    93.10   135.50      8 <
   6   9   2     2.23    38.70   135.80      8 <
   6   9   3     2.39   100.00   134.40      8 <
   6  10  -2     7.20    14.10   134.10      8 <
   6  11  -7    24.33   -21.70   134.10      8 <
   6  11  -6     7.10   -39.70   133.20      8 <
   6  12 -11     0.92    -7.00   133.10      8 <
   6  12 -10    21.87    59.40   131.40      8 <
   6  13 -16    11.93     8.10   129.10      8 <
   6  13 -15     3.94    52.90   132.70      8 <
   6  13 -14     2.09    15.50   128.20      8 <
   7   7  19     1.31    34.40   132.50      8 <
   7   7  20     6.99    19.40   135.80      8 <
   7   8  14     2.86    44.10   133.90      8 <
   7   8  15    51.37   -59.20   134.00      8 <
   7   8  16     1.17    70.80   141.40      8 <
   7   9  10     7.65   -37.90   134.50      8 <
   7   9  11     3.88   -10.60   131.80      8 <
   7  10   5    65.21    -1.50   112.10      8 <
   7  10   6    45.54    54.80   133.90      8 <
   7  11   1   109.00     7.20   139.00      8 <
   7  11   2    28.52   224.20   137.70      8 <
   7  12  -4     0.79    14.00   138.00      8 <
   7  12  -3     9.71    -8.60   139.30      8 <
  -7  -8  -7     1.90   -26.70   133.40     11 <
  -7  -8  -6    42.57    42.00   135.60     11 <
  -7  -7 -12    37.08   103.10   135.40     11 <
  -7  -7 -11     4.47   106.10   137.10     11 <
  -7  -6 -17     4.11    18.30   134.60     11 <
  -7  -6 -16    15.81   -18.30   133.20     11 <
  -7  -5 -22    49.30   119.00   135.60     11 <
  -7  -5 -21     4.32    83.20   138.30     11 <
  -6 -11  17     3.20   -45.50   134.60     11 <
  -6 -11  18     0.51    -1.20   131.00     11 <
  -6 -10  11     7.11    -4.20   112.10     11 <
  -6 -10  12     2.85   203.20   139.80     11 <
  -6  -9   5    12.27    48.40   129.90     11 <
  -6  -9   6     9.98   -45.90   135.30     11 <
  -6  -8   0    66.56   148.50   142.60     11 <
  -6  -8   1    14.56    83.10   139.00     11 <
  -6  -7  -5     6.76   -41.40   132.20     11 <
  -6  -6 -11    41.47   -12.00   130.60     11 <
  -6  -6 -10     2.45    56.40   130.10     11 <
  -6  -5 -16    26.97   -13.30   112.10     11 <
  -6  -5 -15     4.33   -17.40   127.60     11 <
  -6  -4 -21     1.75    96.90   130.50     11 <
  -6  -4 -20    12.83   -16.80   112.10     11 <
  -6  -3 -25     1.96     1.30   124.70     11 <
  -5 -10  18    36.99    39.70   132.10     11 <
  -5 -10  19     4.36   -27.90   130.00     11 <
  -5 -10  20     4.04    30.10   130.60     11 <
  -5  -9  13    14.28   -33.20   130.30     11 <
  -5  -9  14    42.59    43.20   131.40     11 <
  -5  -8   7    57.42    54.00   142.80     11 <
  -5  -8   8    18.06    -6.50   135.30     11 <
  -5  -7   2    14.59    37.10   139.10     11 <
  -5  -6  -4    11.02    19.80   136.30     11 <
  -5  -6  -3   138.55    29.20   134.30     11 <
  -5  -5  -9    57.41   -27.00   130.70     11 <
  -5  -5  -8    59.31   -15.60   126.80     11 <
  -5  -4 -14     4.89    28.70   132.70     11 <
  -5  -4 -13     8.77    20.70   129.10     11 <
  -5  -3 -19     8.47    55.30   130.30     11 <
  -5  -3 -18    15.92    -8.40   112.10     11 <
  -5  -2 -24     2.56   -16.10   126.70     11 <
  -5  -2 -23     2.31     8.10   127.40     11 <
  -5  -1 -28     2.39    25.10   126.00     11 <
  -4  -9  20     8.07   -23.10   128.40     11 <
  -4  -9  21    15.59    20.50   128.70     11 <
  -4  -9  22    11.35    94.70   128.50     11 <
  -4  -8  15    61.11    16.00   138.50     11 <
  -4  -7   9    33.04    20.90   134.60     11 <
  -4  -7  10    55.00    60.70   137.00     11 <
  -4  -6   4    61.44    -1.80   134.20     11 <
  -4  -5  -2    10.62   -62.50   132.00     11 <
  -4  -4  -7    43.10     1.20   130.50     11 <
  -4  -3 -12    80.89    75.20   131.90     11 <
  -4  -2 -18    96.26   177.50   131.90     11 <
  -4  -2 -17    15.78    35.60   129.80     11 <
  -4  -1 -23     2.28    33.20   132.20     11 <
  -4  -1 -22     7.05    36.20   124.60     11 <
  -4   0 -28     6.67    -1.50   112.10     11 <
  -4   0 -27     0.84   -10.20   126.50     11 <
  -3  -8  22     8.48    -7.00   112.10     11 <
  -3  -8  23    15.73   -12.00   112.10     11 <
  -3  -7  16    28.93   -19.90   134.40     11 <
  -3  -7  17     5.74    80.30   134.50     11 <
  -3  -6  11    16.93    30.50   156.00     11 <
  -3  -5   5    29.50     2.20   187.10     11 <
  -3  -3  -5   241.71   -37.40   155.00     11 <
  -3  -2 -11   716.42  1843.30   154.20     11 o
  -3  -1 -16    28.38    64.00   135.50     11 <
  -3   0 -21    54.50   -16.60   127.40     11 <
  -3   0 -20     9.11   -35.80   122.50     11 <
  -3   1 -26     1.25     8.90   124.80     11 <
  -3   1 -25    12.47     3.90   125.10     11 <
  -3   2 -30     0.87   132.10   127.80     11 <
  -2  -6  18   218.56    -7.00   143.00     11 <
  -2  -6  19    11.34    16.00   132.60     11 <
  -2  -5  13    46.54   -47.90   134.80     11 <
  -2  -4   7   327.96   379.20   178.90     11 <
  -2  -3   2  3514.00  2855.80   255.90     11 o
  -2  -1  -9   637.74   670.40   180.30     11 o
  -2   0 -14    59.52    13.60   157.90     11 <
  -2   1 -19   192.52   821.10   142.60     11 o
  -2   2 -24    21.24   -16.60   122.00     11 <
  -2   3 -29    13.20     0.30   112.10     11 <
  -2   3 -28    17.72   -30.20   121.10     11 <
  -1  -5  20    34.37    64.10   134.80     11 <
  -1  -5  21    44.33   102.70   127.50     11 <
  -1  -4  15    75.27    78.20   137.20     11 <
  -1  -3   9    70.68   164.30   172.60     11 <
  -1  -1  -2  3698.60  4386.20   307.80     11 o
  -1   0  -7   413.71   145.80   340.30     11 <
  -1   1 -12   295.18   213.70   166.10     11 <
  -1   2 -17    72.29   192.10   133.90     11 <
  -1   3 -23    19.36    77.80   126.80     11 <
  -1   3 -22    41.38   162.10   133.80     11 <
  -1   4 -28    10.11   -19.50   126.80     11 <
  -1   4 -27     3.48   -18.50   125.50     11 <
   0  -4  22    62.33   558.50   137.80     11 o
   0  -4  23   154.74    17.60   138.60     11 <
   0  -3  17   652.84   462.80   216.30     11 <
   0  -2  11   137.84   100.40   228.70     11 <
   0   3 -16  3602.80  4563.10   217.50     11 o
   0   3 -15   421.40  1537.00   218.80     11 o
   0   4 -21    42.63   224.20   146.40     11 <
   0   4 -20   199.41   154.40   132.90     11 <
   0   5 -26   343.23   -10.40   112.10     11 <
   0   5 -25    26.67   -20.00   124.80     11 <
   0   6 -30     1.65    14.40   121.10     11 <
   1  -3  24   161.21     0.40   112.10     11 <
   1  -2  19    23.82    68.30   134.10     11 <
   1  -1  13   357.43   995.40   163.90     11 o
   1   1   2  3515.70  2098.60   294.40     11 o
   1   4 -14   136.15    44.40   144.40     11 <
   1   5 -19   160.45    82.30   125.40     11 <
   1   5 -18    10.76   -30.70   133.10     11 <
   1   6 -24     9.98   -19.60   126.90     11 <
   1   6 -23    80.61    71.90   123.60     11 <
   1   7 -29     3.05   -31.90   124.00     11 <
   1   7 -28     6.28   -13.50   124.70     11 <
   2  -1  21   123.34    -3.00   112.10     11 <
   2   0  15   666.65   199.50   142.00     11 <
   2   2   4   269.59   471.00   265.10     11 <
   2   4  -7   350.60   276.70   175.30     11 <
   2   5 -12    58.16   113.00   139.40     11 <
   2   6 -17   150.69    32.10   136.90     11 <
   2   7 -22    11.82    -5.50   112.10     11 <
   2   7 -21     8.07   -19.80   120.30     11 <
   2   8 -27    13.36   -11.60   112.10     11 <
   2   8 -26     4.57   -15.10   123.10     11 <
   3   0  23   124.99    94.80   128.40     11 <
   3   0  24    24.99    -8.00   125.40     11 <
   3   1  17   117.97    71.30   135.60     11 <
   3   1  18    36.83    73.80   131.50     11 <
   3   2  12   479.29   409.40   138.30     11 <
   3   3   6   559.66     2.30   144.30     11 <
   3   4   1   115.87    28.50   164.20     11 <
   3   5  -5    26.74    84.50   181.80     11 <
   3   6 -10    10.83    22.70   145.90     11 <
   3   7 -15     5.78   115.70   130.90     11 <
   3   8 -20    12.35   -34.00   124.50     11 <
   3   8 -19     3.67    11.10   126.00     11 <
   3   9 -25     3.26    40.50   124.10     11 <
   3   9 -24    13.42    16.10   121.60     11 <
   4   1  25    17.67    32.50   126.40     11 <
   4   2  19    66.20    57.10   129.10     11 <
   4   2  20   135.90   -19.30   129.50     11 <
   4   3  14    17.78   -22.70   128.90     11 <
   4   4   8    70.58    73.20   140.70     11 <
   4   5   3   196.30   -10.20   161.20     11 <
   4   6  -3   221.83     2.60   136.40     11 <
   4   6  -2    77.29   180.60   135.00     11 <
   4   7  -8    14.48   -27.70   135.30     11 <
   4   8 -13    22.86    13.70   131.60     11 <
   4   8 -12    63.07     6.60   141.90     11 <
   4   9 -18     2.67   -15.00   123.30     11 <
   4   9 -17     3.58    -7.90   112.10     11 <
   4  10 -23     1.55    -4.80   124.50     11 <
   4  10 -22     2.75   -28.10   122.40     11 <
   5   3  21    34.59   -34.40   127.90     11 <
   5   3  22   101.11     0.50   112.10     11 <
   5   3  23     8.82    40.70   127.20     11 <
   5   4  16    54.04    16.50   130.80     11 <
   5   4  17    41.56    -1.00   125.30     11 <
   5   5  10    58.81   -22.70   129.10     11 <
   5   5  11   576.56   134.00   137.70     11 <
   5   6   5   453.35   452.70   149.40     11 o
   5   7  -1   120.03   -27.50   133.80     11 <
   5   7   0   223.97   112.10   144.80     11 <
   5   8  -6   194.53    69.50   157.50     11 <
   5   8  -5   974.25  1690.40   153.60     11 o
   5   9 -11   109.90   512.70   137.80     11 o
   5   9 -10    44.51   -21.00   129.50     11 <
   5  10 -16    31.26    -3.90   129.60     11 <
   5  10 -15   215.10   160.00   127.20     11 <
   5  11 -21    28.92   -27.70   125.70     11 <
   5  11 -20    11.82   -13.20   126.80     11 <
   6   4  24     1.27    40.00   125.30     11 <
   6   4  25     3.10   -17.90   127.20     11 <
   6   5  18    17.29    22.40   131.10     11 <
   6   5  19    22.33   -12.60   128.90     11 <
   6   6  12     2.88   108.20   131.80     11 <
   6   6  13    16.39    11.50   126.40     11 <
   6   7   7    10.80    22.00   130.50     11 <
   6   7   8     9.70    -4.20   112.10     11 <
   6   8   2    21.17   -39.40   134.80     11 <
   6   9  -4    15.39   -14.10   128.10     11 <
   6   9  -3    24.08   -18.80   112.10     11 <
   6  10  -9     6.38    28.90   133.00     11 <
   6  10  -8     6.09    34.40   130.00     11 <
   6  11 -14     4.68    -5.90   112.10     11 <
   6  11 -13     4.43    -6.10   112.10     11 <
   6  12 -19     0.32    23.30   130.00     11 <
   6  12 -18     1.29   -29.30   125.90     11 <
   7   6  20     4.21   111.50   128.30     11 <
   7   6  21     1.02   -38.40   128.30     11 <
   7   7  15     1.14   -35.90   130.70     11 <
   7   7  16    45.20    93.40   133.60     11 <
   7   8   9     4.01    34.80   133.10     11 <
   7   8  10    34.30    -0.70   133.40     11 <
   7   9   4    19.12   -14.70   130.10     11 <
   7   9   5     5.74   -40.70   131.50     11 <
   7  10  -2     6.84    51.90   130.50     11 <
   7  10  -1     2.81    38.80   133.30     11 <
   7  11  -7     4.11   -24.50   128.90     11 <
   7  11  -6    10.90   -12.60   112.10     11 <
   7  12 -12     3.15    96.60   132.20     11 <
   7  12 -11     5.58   -30.70   130.10     11 <
  -7  -7 -16     3.33   -28.50   133.50     12 <
  -7  -7 -15     0.99   -56.60   129.00     12 <
  -7  -6 -21     0.19   -49.90   131.60     12 <
  -7  -6 -20     1.84    76.00   136.40     12 <
  -6 -11  16     0.54    -0.20   112.10     12 <
  -6 -11  17     3.06    -8.30   134.60     12 <
  -6 -11  18     0.46   -13.70   136.00     12 <
  -6 -10  10     2.56    92.80   132.00     12 <
  -6 -10  11     0.09    33.90   137.00     12 <
  -6  -9   4    19.94     3.30   130.20     12 <
  -6  -9   5     1.96    27.00   131.70     12 <
  -6  -8  -2     3.00    60.00   134.50     12 <
  -6  -8  -1    11.92   186.30   136.50     12 <
  -6  -7  -8     0.47    55.30   132.00     12 <
  -6  -7  -7     9.62   -13.30   127.00     12 <
  -6  -6 -14     5.81    12.60   126.50     12 <
  -6  -6 -13     4.69    53.40   131.20     12 <
  -6  -5 -19     7.08   -19.70   112.10     12 <
  -6  -5 -18     8.17    -6.00   125.40     12 <
  -6  -4 -25     2.11     5.90   129.40     12 <
  -6  -4 -24     0.09   -10.90   127.40     12 <
  -5 -10  18    40.73    75.70   131.70     12 <
  -5 -10  19     4.48    43.90   134.90     12 <
  -5 -10  20     1.97    12.00   134.50     12 <
  -5  -9  12    17.46     5.30   131.80     12 <
  -5  -9  13     1.11   102.50   136.90     12 <
  -5  -8   6   208.17   415.60   149.10     12 <
  -5  -8   7    50.10    43.80   146.90     12 <
  -5  -7   0   143.41   303.40   140.90     12 <
  -5  -7   1    99.75   253.00   150.30     12 <
  -5  -6  -6    56.86    36.80   156.70     12 <
  -5  -6  -5   910.63  1319.40   153.40     12 o
  -5  -5 -12   338.38   444.70   139.30     12 o
  -5  -5 -11   638.62  1004.30   148.30     12 o
  -5  -4 -17     3.68    13.80   130.00     12 <
  -5  -4 -16    64.80   -16.20   112.10     12 <
  -5  -3 -23    16.42   -30.10   126.50     12 <
  -5  -3 -22    82.64   -21.20   123.20     12 <
  -5  -2 -28     5.83   -19.20   122.90     12 <
  -5  -2 -27     2.76    -4.30   122.70     12 <
  -4  -9  21     3.56    11.20   133.10     12 <
  -4  -9  22     8.26   116.40   134.30     12 <
  -4  -9  23     3.27    71.50   134.20     12 <
  -4  -8  14    78.28   360.30   150.30     12 <
  -4  -8  15    22.77   210.40   149.30     12 <
  -4  -8  16     0.82    39.50   136.80     12 <
  -4  -7   8     4.37   -18.10   129.90     12 <
  -4  -7   9    13.02   -43.80   132.20     12 <
  -4  -6   2    72.16   141.10   145.20     12 <
  -4  -6   3   160.98   124.20   144.80     12 <
  -4  -5  -4  1749.10  3799.70   176.00     12 o
  -4  -5  -3   238.54   140.00   181.70     12 <
  -4  -4  -9     6.96    62.00   130.30     12 <
  -4  -3 -15    18.07   -19.80   128.10     12 <
  -4  -2 -21    10.79     0.70   112.10     12 <
  -4  -2 -20    92.28   117.50   132.20     12 <
  -4  -1 -26     0.08    31.00   126.00     12 <
  -4  -1 -25     1.70   -18.70   125.80     12 <
  -4   0 -30     0.26   -17.80   126.60     12 <
  -3  -8  23    21.11   -25.70   123.00     12 <
  -3  -8  24     2.92    38.30   126.30     12 <
  -3  -7  17     6.25   -29.80   131.70     12 <
  -3  -7  18    19.05   101.00   128.30     12 <
  -3  -6  11     6.39    -2.20   137.50     12 <
  -3  -5   5     2.38    73.00   169.40     12 <
  -3  -4  -1    15.01   286.40   164.20     12 <
  -3  -3  -7   160.83    53.70   158.40     12 <
  -3  -2 -13   144.27   137.70   141.90     12 <
  -3  -1 -19   163.26   -31.10   128.70     12 <
  -3  -1 -18     2.53   -37.60   133.50     12 <
  -3   0 -24    21.38    -0.50   121.20     12 <
  -3   0 -23     3.64    57.50   124.40     12 <
  -3   1 -30     1.37   -24.20   124.90     12 <
  -3   1 -29     2.25    -1.10   112.10     12 <
  -3   1 -28     0.44   -30.60   124.90     12 <
  -2  -6  19     0.93   124.60   133.60     12 <
  -2  -6  20    10.91   134.80   133.30     12 <
  -2  -6  21    56.94    37.40   125.10     12 <
  -2  -5  13     2.29   -33.40   132.50     12 <
  -2  -5  14     8.58   -17.90   132.20     12 <
  -2  -4   7   339.07   114.90   165.10     12 <
  -2  -3   1   649.61   993.60   281.70     12 o
  -2  -2  -5  7073.90  8916.80   278.60     12 o
  -2  -1 -11   383.82   762.70   170.60     12 o
  -2  -1 -10   502.17   377.50   186.30     12 <
  -2   0 -16    56.45    25.40   169.20     12 <
  -2   1 -22    29.05     1.90   131.00     12 <
  -2   1 -21    42.69    -6.60   112.10     12 <
  -2   2 -27     9.50     0.70   112.10     12 <
  -2   2 -26    10.21    76.50   122.80     12 <
  -1  -5  22    44.31    69.80   126.90     12 <
  -1  -5  23     6.71   -22.10   127.60     12 <
  -1  -4  16     7.94   -42.50   125.10     12 <
  -1  -3  10     6.50     1.30   167.10     12 <
  -1   0  -8 19362.00 19431.40   333.40     12 o
  -1   1 -14   673.52   599.60   166.70     12 o
  -1   2 -20    10.67   142.20   131.60     12 <
  -1   2 -19    13.11    -3.10   134.90     12 <
  -1   3 -25     4.59    11.50   120.60     12 <
  -1   3 -24     3.76    20.70   125.80     12 <
  -1   4 -30     3.38    43.60   126.70     12 <
  -1   4 -29     0.24   189.00   129.60     12 <
   0  -3  18   507.54     0.80   142.70     12 <
   0  -3  19    57.15    56.80   126.30     12 <
   0  -2  12  2182.10  3164.50   199.50     12 o
   0  -1   6 35590.00 37392.60   421.10     12 o
   0   1  -6 34651.00 33800.80   421.30     12 o
   0   3 -17   732.47   642.80   232.80     12 <
   0   4 -23    38.66    30.40   136.50     12 <
   0   4 -22    26.97   128.20   142.40     12 <
   0   5 -28    25.41    11.00   130.10     12 <
   0   5 -27    24.65    93.20   132.80     12 <
   1  -2  21     8.44    13.20   138.70     12 <
   1  -2  22     4.71   131.20   135.90     12 <
   1  -1  15   151.37    99.60   151.70     12 <
   1   0   9  2348.30  2216.30   342.50     12 o
   1   3  -9    40.26   147.90   179.10     12 <
   1   4 -15    52.06    22.20   138.80     12 <
   1   5 -20     1.22   -18.20   112.10     12 <
   1   6 -26     3.20    -5.40   124.20     12 <
   1   6 -25    12.30   -12.70   128.10     12 <
   2  -1  24    13.44    46.70   127.40     12 <
   2  -1  25     3.09    28.10   122.40     12 <
   2   0  17   255.21   282.70   162.20     12 <
   2   0  18  1344.10  1464.70   160.20     12 o
   2   1  11   401.41   501.60   167.00     12 o
   2   2   5  7223.00  4728.10   257.60     12 o
   2   3  -1   627.28   709.40   289.60     12 <
   2   4  -7   327.41   -13.20   175.80     12 <
   2   5 -12    24.77   -41.80   132.80     12 <
   2   6 -18    95.59    27.90   140.20     12 <
   2   6 -17   285.02   596.90   139.10     12 o
   2   7 -24     1.34    -7.70   112.10     12 <
   2   7 -23     2.57   -33.80   120.80     12 <
   2   8 -29     1.76    32.70   124.20     12 <
   2   8 -28     0.83    -3.40   112.10     12 <
   3   1  20     1.35   -24.50   127.70     12 <
   3   1  21    15.61    43.60   129.50     12 <
   3   2  14   268.79   370.10   148.90     12 <
   3   3   8   105.15    69.10   138.70     12 <
   3   4   2   210.45   214.10   153.70     12 <
   3   5  -4  3231.00  3185.70   185.00     12 o
   3   6 -10    20.76    29.20   150.30     12 <
   3   6  -9   339.50  1274.60   149.60     12 o
   3   7 -16    39.50    -9.30   129.50     12 <
   3   7 -15     2.93   -26.90   121.50     12 <
   3   8 -21    37.69   -21.60   121.90     12 <
   3   8 -20     2.67    -1.10   112.10     12 <
   3   9 -26     0.10   -21.40   122.50     12 <
   3   9 -25     0.83    -1.50   112.10     12 <
   4   2  23    20.34     9.00   132.00     12 <
   4   2  24     2.50    16.60   121.50     12 <
   4   3  17     1.80     2.70   134.00     12 <
   4   3  18    72.75    -1.50   112.10     12 <
   4   4  10   150.09     6.90   132.70     12 <
   4   4  11    27.70    -1.20   132.20     12 <
   4   5   4  1708.70  1425.20   160.70     12 o
   4   5   5     0.76   -25.20   157.70     12 <
   4   6  -1    18.46    -6.80   136.10     12 <
   4   7  -7   111.16     3.90   129.90     12 <
   4   8 -13    10.17   -27.90   124.20     12 <
   4   8 -12    69.93    44.70   133.30     12 <
   4   9 -19     0.57    26.30   124.00     12 <
   4   9 -18     3.93    -8.90   128.10     12 <
   4  10 -24     0.24    -3.50   112.10     12 <
   4  10 -23     0.48    22.90   121.70     12 <
   5   4  19    35.34    31.40   128.70     12 <
   5   4  20    34.15    40.30   131.20     12 <
   5   4  21     0.07    32.80   129.60     12 <
   5   5  13   144.53    83.50   140.60     12 <
   5   5  14    35.42   179.60   132.50     12 <
   5   6   7     1.53   -14.60   145.20     12 <
   5   6   8   539.72   379.30   144.90     12 <
   5   7   1    90.28   176.90   135.10     12 <
   5   7   2     1.88    34.50   137.20     12 <
   5   8  -5  1191.10   631.50   162.20     12 o
   5   8  -4   300.56   127.60   153.00     12 <
   5   9 -10    31.91    53.80   129.00     12 <
   5   9  -9     3.98     5.50   130.40     12 <
   5  10 -16    36.96    23.20   126.70     12 <
   5  10 -15   191.34    98.40   128.40     12 <
   5  11 -21    28.36    -7.20   112.10     12 <
   5  11 -20     5.81    -6.00   120.70     12 <
   6   5  22     4.60    32.10   124.60     12 <
   6   5  23     0.10    73.80   129.20     12 <
   6   5  24     0.10    10.60   128.00     12 <
   6   6  16     2.48    42.30   128.30     12 <
   6   6  17     0.16    34.50   130.10     12 <
   6   6  18     2.38   -23.10   125.90     12 <
   6   7  10     0.91   122.20   127.90     12 <
   6   7  11     3.33    30.90   127.80     12 <
   6   8   4     3.50   102.70   128.30     12 <
   6   8   5     6.53   -30.90   129.10     12 <
   6   9  -2     3.04   -10.00   125.40     12 <
   6   9  -1     2.84    -0.60   112.10     12 <
   6  10  -8     8.92   -12.80   128.50     12 <
   6  10  -7     4.73    29.20   124.70     12 <
   6  11 -13     0.20     0.40   112.10     12 <
   6  11 -12     0.12    88.60   130.00     12 <
   6  12 -19     0.04    72.80   132.90     12 <
   6  12 -18     1.69   -13.30   124.70     12 <
   6  12 -17     0.06    11.70   129.30     12 <
   7   7  19     0.37    83.20   130.70     12 <
   7   7  20     3.42   -37.60   133.10     12 <
   7   8  13     4.91    64.50   133.30     12 <
   7   8  14     0.41   -31.10   128.90     12 <
   7   9   7     3.26   -34.20   125.80     12 <
   7   9   8     2.45   -42.50   129.10     12 <
   7  10   1     3.84   -14.50   131.80     12 <
   7  10   2     3.89    89.70   135.40     12 <
   7  11  -5     3.00   -12.20   136.50     12 <
   7  11  -4     0.04   100.00   131.30     12 <
   7  12 -11     4.55    26.60   134.30     12 <
   7  12 -10     0.27    44.70   133.20     12 <
   7  12  -9     1.32    67.90   136.50     12 <
  -7  -8  -6    40.91    -9.00   140.90     13 <
  -7  -7 -14     3.07    99.30   141.90     13 <
  -7  -7 -13     2.00   157.50   142.10     13 <
  -7  -7 -12    79.78   -65.50   139.90     13 <
  -7  -6 -20     5.47    48.60   140.40     13 <
  -7  -6 -19     3.44    49.20   141.40     13 <
  -7  -6 -18    10.97   -49.00   139.40     13 <
  -6 -11  20     2.99     3.10   137.30     13 <
  -6 -10  13    10.60   -59.00   141.20     13 <
  -6 -10  14     3.00    83.30   140.00     13 <
  -6 -10  15    11.02    54.90   135.70     13 <
  -6  -9   7    30.13   155.80   142.10     13 <
  -6  -9   8    16.07    64.00   136.00     13 <
  -6  -8   0    76.17   114.60   140.30     13 <
  -6  -8   1    17.88    71.20   142.60     13 <
  -6  -7  -6    26.88   118.50   141.90     13 <
  -6  -7  -5     2.28   -23.10   112.10     13 <
  -6  -6 -12     0.51    79.30   132.00     13 <
  -6  -6 -11    21.43   -43.50   136.30     13 <
  -6  -5 -18    11.40   -29.10   132.20     13 <
  -6  -5 -17    19.99   -40.90   130.70     13 <
  -6  -4 -24     0.69     0.30   126.00     13 <
  -6  -4 -23     0.70   -23.60   131.00     13 <
  -6  -4 -22     4.31    63.00   127.10     13 <
  -5 -10  22     0.67   -13.20   133.30     13 <
  -5 -10  23     3.16   -42.00   132.90     13 <
  -5  -9  15     2.02    27.40   134.10     13 <
  -5  -9  16     3.41   -49.30   128.00     13 <
  -5  -9  17    17.23   -42.80   130.30     13 <
  -5  -8   9    51.28   -35.20   136.00     13 <
  -5  -8  10    62.10   121.00   135.80     13 <
  -5  -7   2     8.64   104.90   140.10     13 <
  -5  -7   3    29.55    98.70   140.10     13 <
  -5  -6  -4    13.35   -33.70   167.80     13 <
  -5  -6  -3   166.68   191.70   150.90     13 <
  -5  -5 -10     3.72   -24.60   149.80     13 <
  -5  -5  -9    27.71    38.00   138.80     13 <
  -5  -4 -16    76.58    -7.30   112.10     13 <
  -5  -4 -15    31.51    71.40   130.80     13 <
  -5  -3 -22    80.25    37.30   130.10     13 <
  -5  -3 -21    13.96    -8.40   128.40     13 <
  -5  -2 -28    12.01   -22.60   127.50     13 <
  -5  -2 -27     6.30    40.90   131.30     13 <
  -5  -2 -26    14.66    93.00   131.20     13 <
  -4  -8  17    11.47   -32.60   129.20     13 <
  -4  -8  18     3.80    64.10   132.00     13 <
  -4  -8  19     5.94    41.00   132.00     13 <
  -4  -7  11    27.67    15.30   143.50     13 <
  -4  -7  12    23.00   -23.20   140.70     13 <
  -4  -6   4    15.68   108.10   151.20     13 <
  -4  -6   5   202.00   242.10   151.20     13 <
  -4  -5  -2    19.65   126.40   159.00     13 <
  -4  -4  -8     6.60     4.80   139.90     13 <
  -4  -3 -14    22.58    44.30   138.20     13 <
  -4  -2 -20   110.49   132.50   129.30     13 <
  -4  -2 -19    20.72   -34.10   132.30     13 <
  -4  -1 -26     1.95    20.50   130.10     13 <
  -4  -1 -25     3.11   -24.90   122.80     13 <
  -4   0 -30     1.38    76.30   133.90     13 <
  -3  -7  19    29.59   -16.20   135.00     13 <
  -3  -7  20    27.99    14.50   132.60     13 <
  -3  -7  21    43.41    79.80   134.90     13 <
  -3  -6  13   326.36   284.30   167.00     13 <
  -3  -6  14   379.61   322.70   144.70     13 <
  -3  -5   6  1041.00  1149.60   159.60     13 o
  -3  -5   7    45.57   -30.40   160.90     13 <
  -3  -3  -6   398.85   527.90   179.20     13 <
  -3  -2 -12   198.90   108.70   165.50     13 <
  -3  -1 -18    22.24   -29.60   137.40     13 <
  -3   0 -24    28.31    54.90   129.60     13 <
  -3   0 -23    14.01   181.40   130.40     13 <
  -3   1 -30     2.55    50.30   129.70     13 <
  -3   1 -29     1.97   -23.90   127.30     13 <
  -3   1 -28     2.32    -0.10   112.10     13 <
  -2  -6  22    18.39    36.00   129.90     13 <
  -2  -6  23     8.53   -23.90   130.30     13 <
  -2  -5  15    12.96    -2.30   134.50     13 <
  -2  -5  16    41.88   -37.10   138.30     13 <
  -2  -4   8   426.92   638.00   176.80     13 o
  -2  -4   9   930.29   149.70   212.60     13 <
  -2  -3   2  5767.10  4759.60   348.00     13 o
  -2  -2  -4   543.42  1157.10   320.80     13 o
  -2  -1 -10   465.90   432.60   189.70     13 <
  -2   0 -16    96.79    22.10   162.00     13 <
  -2   1 -22    21.07   127.00   129.70     13 <
  -2   1 -21    58.90   105.90   140.50     13 <
  -2   2 -28    38.11    14.70   129.20     13 <
  -2   2 -27     7.52   -19.60   127.60     13 <
  -1  -5  24    75.42   154.90   133.60     13 <
  -1  -4  17    52.12   145.80   134.90     13 <
  -1  -4  18   114.64    50.60   144.50     13 <
  -1  -3  11   529.35   393.70   191.40     13 <
  -1  -2   4  8424.10  9570.50   356.00     13 o
  -1  -1  -2  5217.50  6251.20   355.70     13 o
  -1   0  -8 22035.00 24430.80   356.90     13 o
  -1   1 -14   696.51  1246.70   161.50     13 o
  -1   2 -20    38.60     4.60   138.30     13 <
  -1   3 -26    17.94    40.10   134.80     13 <
  -1   3 -25    12.37    50.10   134.40     13 <
  -1   4 -30     4.98   -12.80   131.20     13 <
   0  -3  19    79.61    -4.40   112.10     13 <
   0  -3  20    84.38   167.40   136.20     13 <
   0  -2  13   206.65   128.10   181.20     13 <
   0   1  -6 44833.00 46013.80   538.40     13 o
   0   2 -12  3568.10  4661.20   196.50     13 o
   0   3 -18   361.18    49.00   159.60     13 <
   0   4 -24    70.13   142.30   137.90     13 <
   0   4 -23    52.24    -2.80   112.10     13 <
   0   5 -30     1.03   -14.20   130.20     13 <
   0   5 -29     2.21   118.70   129.70     13 <
   0   5 -28    40.74    15.30   129.20     13 <
   1  -2  22    10.15    48.00   133.70     13 <
   1  -2  23    34.63   -17.70   129.80     13 <
   1  -1  15   207.75    88.50   148.40     13 <
   1  -1  16    65.51   -64.20   139.40     13 <
   1   0   9  3062.70  3136.50   364.20     13 o
   1   2  -4  8074.30  5613.70   299.10     13 o
   1   3 -10    88.60   124.70   174.80     13 <
   1   4 -16    18.90    -6.50   134.00     13 <
   1   5 -22    54.20    34.60   126.20     13 <
   1   5 -21    41.18     9.30   133.80     13 <
   1   6 -28     7.36    40.60   123.80     13 <
   1   6 -27     2.70    61.00   128.10     13 <
   1   6 -26     5.49     0.00   120.80     13 <
   2  -1  24    40.01   -27.10   127.50     13 <
   2  -1  25    15.94    17.80   134.30     13 <
   2   0  17   242.22    52.70   154.30     13 <
   2   0  18  1336.60   627.20   154.30     13 o
   2   1  11   437.89   637.20   168.10     13 o
   2   3  -2  5942.20  4440.10   297.20     13 o
   2   4  -8   345.17    84.10   169.60     13 <
   2   5 -14    11.65   -34.90   139.50     13 <
   2   6 -20    17.63   -22.10   134.20     13 <
   2   6 -19     3.98   -35.60   127.30     13 <
   2   7 -26     0.80    59.30   126.30     13 <
   2   7 -25     1.55    79.70   130.90     13 <
   2   7 -24     4.60    -1.10   112.10     13 <
   3   1  20    10.15    -7.60   112.10     13 <
   3   1  21    28.93   -13.90   129.60     13 <
   3   2  13   224.66   192.40   150.20     13 <
   3   2  14   313.79   476.80   154.70     13 o
   3   3   7   149.25    39.10   163.20     13 <
   3   4   1    58.05   156.30   167.10     13 <
   3   5  -6  1075.90   603.60   162.40     13 o
   3   5  -5    15.30     3.50   159.60     13 <
   3   6 -12   416.34   612.90   161.60     13 o
   3   6 -11    10.10   249.70   155.50     13 <
   3   7 -18    32.32    24.50   130.90     13 <
   3   7 -17    11.53    84.60   132.80     13 <
   3   8 -23    17.09    28.50   127.00     13 <
   3   8 -22     5.42   138.70   131.20     13 <
   3   9 -28     7.55    35.70   128.20     13 <
   4   2  22    11.79   -42.00   128.90     13 <
   4   2  23    22.06    12.70   134.10     13 <
   4   2  24     5.48    69.80   133.30     13 <
   4   3  16   216.26   397.30   139.30     13 <
   4   3  17     7.39   -23.70   136.40     13 <
   4   4   9     9.50    25.90   136.10     13 <
   4   4  10   138.43   259.20   139.90     13 <
   4   5   3   314.04   200.60   176.60     13 <
   4   6  -3   176.86   -29.70   147.60     13 <
   4   7  -9    19.32   -13.80   134.90     13 <
   4   8 -15    22.91   125.50   144.30     13 <
   4   9 -21     4.02   -32.10   127.60     13 <
   4   9 -20     1.90    41.10   128.50     13 <
   4  10 -26     3.06   116.30   127.30     13 <
   4  10 -25     2.68   -17.10   129.40     13 <
   5   3  25     1.73    -1.90   125.40     13 <
   5   4  18    37.80   -10.70   124.40     13 <
   5   4  19    32.06    74.90   125.50     13 <
   5   4  20    54.28    51.80   132.40     13 <
   5   5  12   282.29   136.50   156.20     13 <
   5   5  13   206.89   236.60   146.10     13 <
   5   6   5  1025.00  1520.80   157.70     13 o
   5   6   6    68.08    86.30   157.80     13 <
   5   7  -1   141.31   286.10   137.00     13 <
   5   7   0   129.14   173.90   148.40     13 <
   5   8  -7    57.65    17.90   138.40     13 <
   5   8  -6   265.15   109.80   143.90     13 <
   5   9 -13     1.72    -9.60   127.00     13 <
   5   9 -12    37.73   -20.80   130.60     13 <
   5  10 -19     5.88   -20.30   125.00     13 <
   5  10 -18    39.75   -23.00   127.50     13 <
   5  11 -23     7.02    -0.90   124.10     13 <
   6   5  21     3.44    42.90   127.40     13 <
   6   5  22     6.39    32.60   129.50     13 <
   6   5  23     0.39    20.10   131.80     13 <
   6   6  14     4.93   -25.00   130.80     13 <
   6   6  15    38.19     7.00   130.70     13 <
   6   6  16     6.22    44.90   132.10     13 <
   6   7   8     3.10   105.50   130.90     13 <
   6   7   9    23.85   -33.80   125.90     13 <
   6   8   1    22.14   -41.60   133.10     13 <
   6   8   2    10.63    10.50   136.40     13 <
   6   8   3     9.77   -22.90   131.10     13 <
   6   9  -5     2.99   -33.80   132.10     13 <
   6   9  -4    22.65    50.80   135.50     13 <
   6  10 -11     0.44    -8.00   127.70     13 <
   6  10 -10     2.96    -5.40   131.00     13 <
   6  11 -17     3.86   -35.30   127.50     13 <
   6  11 -16     0.59    61.30   131.50     13 <
   6  11 -15     1.51    37.10   135.10     13 <
   7   7  17     2.48   -29.50   129.80     13 <
   7   7  18     0.81   -43.40   134.30     13 <
   7   7  19     2.86   -26.50   134.20     13 <
   7   8  10     3.46   -24.00   130.90     13 <
   7   8  11     0.61   -25.50   132.60     13 <
   7   8  12     1.49    -4.30   132.40     13 <
   7   9   4    34.58   -23.50   130.90     13 <
   7   9   5     9.32   -18.90   134.70     13 <
   7  10  -2     5.63    63.00   132.40     13 <
   7  10  -1     4.84   -18.00   135.30     13 <
   7  11  -8    11.18    30.60   135.10     13 <
   7  11  -7     3.49   -18.70   140.60     13 <
   7  12 -14     7.97    11.90   140.20     13 <
   7  12 -13     5.38    86.90   142.40     13 <
  -7  -7 -14     2.48    34.70   135.70     14 <
  -7  -7 -13     1.56   -38.60   130.00     14 <
  -7  -7 -12    49.12   -33.30   129.20     14 <
  -7  -6 -20     2.16    83.20   135.50     14 <
  -7  -6 -19     3.06   -47.80   132.40     14 <
  -7  -6 -18    10.25    -6.40   133.70     14 <
  -6 -10  15     6.76   -39.70   130.40     14 <
  -6 -10  16     0.39   -21.10   128.50     14 <
  -6 -10  17     0.67    -6.80   125.10     14 <
  -6  -9   8     7.83    64.80   135.30     14 <
  -6  -9   9     1.93    -1.10   112.10     14 <
  -6  -9  10     0.30    10.40   130.40     14 <
  -6  -8   1    15.78   -21.60   137.00     14 <
  -6  -8   2     3.06   -42.30   131.00     14 <
  -6  -8   3     5.86    46.80   141.60     14 <
  -6  -7  -5     0.27    45.50   136.20     14 <
  -6  -7  -4    18.59   125.70   134.20     14 <
  -6  -6 -12     0.49   -22.60   127.20     14 <
  -6  -6 -11    14.10   -27.20   123.90     14 <
  -6  -5 -18     6.28    69.90   127.50     14 <
  -6  -5 -17    11.53   -19.20   126.20     14 <
  -6  -4 -24     0.29    78.80   125.40     14 <
  -6  -4 -23     0.61     1.00   124.20     14 <
  -5  -9  17    11.14   -22.60   124.50     14 <
  -5  -9  18     7.66   -26.00   126.90     14 <
  -5  -9  19     1.23   -22.90   125.30     14 <
  -5  -8  10    54.33    10.60   136.70     14 <
  -5  -8  11    52.07   147.20   136.90     14 <
  -5  -8  12    35.56   152.10   140.20     14 <
  -5  -7   3    20.16     3.80   127.30     14 <
  -5  -7   4   175.21   217.60   133.60     14 <
  -5  -6  -3   134.78   194.90   134.10     14 <
  -5  -5 -10     0.96    40.40   136.20     14 <
  -5  -5  -9    12.28    91.60   129.00     14 <
  -5  -4 -16    49.37   -14.70   126.60     14 <
  -5  -4 -15    27.83    72.70   126.10     14 <
  -5  -3 -23    14.66    -7.40   125.50     14 <
  -5  -3 -22    70.03    -6.10   128.40     14 <
  -5  -3 -21    11.37   -14.40   122.00     14 <
  -5  -2 -28     5.46     0.70   112.10     14 <
  -5  -2 -27     3.09    -3.90   125.80     14 <
  -4  -8  19     0.83   -12.20   122.40     14 <
  -4  -8  20     1.07    79.10   128.60     14 <
  -4  -8  21     1.44    -3.10   112.10     14 <
  -4  -7  12     5.30   -10.60   123.80     14 <
  -4  -7  13    19.85    -5.60   127.80     14 <
  -4  -6   5   150.26   418.50   139.00     14 o
  -4  -6   6    87.55    44.10   146.50     14 <
  -4  -5  -1    53.42   118.50   131.70     14 <
  -4  -4  -8     8.01    41.00   131.80     14 <
  -4  -3 -15    19.92    65.90   129.30     14 <
  -4  -3 -14     8.97   -17.40   133.40     14 <
  -4  -2 -21    10.10    75.80   126.70     14 <
  -4  -2 -20    78.75    61.50   126.40     14 <
  -4  -1 -27     8.77    -8.60   117.70     14 <
  -4  -1 -26     0.20   -18.00   122.60     14 <
  -3  -7  21    27.93    72.20   126.70     14 <
  -3  -7  22    26.80    -5.00   112.10     14 <
  -3  -7  23    24.58    -7.60   123.20     14 <
  -3  -6  14   270.20   673.20   146.40     14 o
  -3  -6  15   149.12   155.30   146.30     14 <
  -3  -5   7    25.48   374.70   142.40     14 <
  -3  -5   8    95.61    14.10   161.50     14 <
  -3  -4   1    18.16    -1.30   155.30     14 <
  -3  -3  -6   355.89   266.60   166.90     14 <
  -3  -2 -13   142.28   172.50   140.40     14 <
  -3  -2 -12   173.14   133.30   161.00     14 <
  -3  -1 -19   118.35    99.70   136.20     14 <
  -3  -1 -18     7.03   104.70   131.70     14 <
  -3   0 -25     4.62   -16.50   127.50     14 <
  -3   0 -24    24.23     6.50   125.20     14 <
  -3   1 -30     0.90   -10.80   125.70     14 <
  -2  -6  24     0.61   133.20   129.30     14 <
  -2  -5  16    36.85     4.40   135.40     14 <
  -2  -5  17     9.02    90.00   126.60     14 <
  -2  -4   9   455.88   110.20   182.50     14 <
  -2  -4  10  2528.90  2796.80   180.00     14 o
  -2  -3   3  8500.40  7896.40   335.80     14 o
  -2  -2  -4   514.20   658.70   282.60     14 <
  -2  -1 -11   360.78   471.00   168.50     14 <
  -2   0 -17   196.26   125.40   158.60     14 <
  -2   1 -23     2.42   -15.80   120.80     14 <
  -2   1 -22    27.70   -21.20   125.50     14 <
  -2   2 -30     2.88    -9.40   116.90     14 <
  -2   2 -29     2.92    24.50   120.20     14 <
  -2   2 -28    28.16    80.60   122.60     14 <
  -1  -4  19    11.45    96.50   126.70     14 <
  -1  -4  20    41.16    47.70   132.70     14 <
  -1  -3  12  1054.20   833.50   172.70     14 o
  -1  -2   5  4830.20  5269.50   290.50     14 o
  -1  -1  -2  2721.50  2706.00   339.60     14 o
  -1   0  -9  2164.30  1614.20   418.70     14 o
  -1   1 -15   119.90    73.80   164.50     14 <
  -1   2 -21     9.49   -13.90   121.50     14 <
  -1   3 -28     0.17    32.10   125.60     14 <
  -1   3 -27     3.52    73.20   124.50     14 <
  -1   3 -26     3.53   -15.20   124.00     14 <
   0  -3  21   142.15   -11.50   131.50     14 <
   0  -3  22    76.72   109.30   126.60     14 <
   0  -2  14    11.84    88.50   131.90     14 <
   0  -1   7 14250.00 14329.60   407.40     14 o
   0   2 -13   143.59    53.40   179.30     14 <
   0   3 -19    44.74    -2.20   136.40     14 <
   0   4 -26     2.02    18.90   126.30     14 <
   0   4 -25    32.95    65.30   124.10     14 <
   0   5 -30     0.14     0.00   112.10     14 <
   1  -2  23    15.43     5.50   124.30     14 <
   1  -2  24     1.16    -5.60   112.10     14 <
   1  -2  25    14.19    14.20   126.00     14 <
   1  -1  16    14.53   154.50   138.80     14 <
   1  -1  17     5.32    -8.70   132.90     14 <
   1   0   9  2311.10  2332.50   281.40     14 o
   1   1   2  2469.20  2063.90   331.50     14 o
   1   3 -11   421.12   784.20   176.80     14 o
   1   4 -17    33.18    -8.50   134.10     14 <
   1   5 -24    56.83   137.60   124.60     14 <
   1   5 -23     4.68    86.80   128.00     14 <
   1   6 -30     0.41   -10.30   122.80     14 <
   1   6 -29     0.12    -2.10   112.10     14 <
   1   6 -28     6.09   -13.80   126.80     14 <
   2  -1  25     7.22   -16.10   122.60     14 <
   2   0  18  1279.10  1634.40   150.70     14 o
   2   0  19   254.02   109.60   165.70     14 <
   2   1  11   355.95   304.50   161.90     14 <
   2   1  12    43.16    59.70   147.50     14 <
   2   3  -2  4446.90  4968.80   320.50     14 o
   2   4  -9   447.44   133.80   196.90     14 <
   2   5 -15     0.84   136.30   126.20     14 <
   2   6 -22    14.63     1.70   118.10     14 <
   2   6 -21    38.76    -6.80   112.10     14 <
   2   7 -28     0.19     0.50   112.10     14 <
   2   7 -27    11.19   -10.30   123.60     14 <
   2   7 -26     0.63    18.00   124.00     14 <
   3   1  21    14.95   -35.00   121.50     14 <
   3   1  22    19.03    -4.40   122.60     14 <
   3   2  14   239.58   163.60   141.60     14 <
   3   3   7   127.55   107.60   136.50     14 <
   3   5  -7    23.76    54.60   152.00     14 <
   3   5  -6   963.80   925.70   145.90     14 o
   3   6 -13   273.15   174.80   158.60     14 <
   3   6 -12   301.81  1039.10   150.90     14 o
   3   7 -19     7.85     3.50   118.40     14 <
   3   7 -18    19.80    33.10   129.50     14 <
   3   8 -26     8.82    -7.00   122.20     14 <
   3   8 -25    15.34   -15.30   119.20     14 <
   3   8 -24     2.47   -29.90   123.60     14 <
   4   2  23    17.90   -11.10   123.20     14 <
   4   2  24     1.83    92.30   122.60     14 <
   4   2  25     1.71    -2.60   112.10     14 <
   4   3  16   189.69   544.70   135.30     14 o
   4   3  17     3.92    -1.00   137.00     14 <
   4   4   9     9.42    27.70   133.70     14 <
   4   4  10   123.72   133.90   137.70     14 <
   4   5   2    13.05   -20.30   134.40     14 <
   4   5   3   227.67    31.90   148.90     14 <
   4   6  -4     4.75   -22.50   142.30     14 <
   4   7 -11    23.89    99.60   126.80     14 <
   4   7 -10    41.18    -7.40   112.10     14 <
   4   8 -17     4.24   -16.30   122.30     14 <
   4   8 -16     0.45    18.10   121.90     14 <
   4   9 -23     2.22   -13.30   123.70     14 <
   4   9 -22     7.92    -4.90   116.70     14 <
   5   4  18    15.33    49.90   122.80     14 <
   5   4  19    27.81     9.90   124.70     14 <
   5   4  20    33.34    16.60   123.80     14 <
   5   5  11   662.21   254.20   135.60     14 <
   5   5  12   241.25    29.50   141.90     14 <
   5   5  13   134.34    84.20   133.40     14 <
   5   6   5   707.21   318.50   142.80     14 <
   5   6   6    53.32    71.10   147.70     14 <
   5   7  -2     1.11   -18.80   131.80     14 <
   5   7  -1    91.88   109.80   132.60     14 <
   5   8  -9    43.35     8.30   126.10     14 <
   5   8  -8     1.69   -19.00   132.40     14 <
   5   9 -15     0.16    25.10   126.20     14 <
   5   9 -14    25.36    -1.50   124.80     14 <
   5  10 -21    16.76    -4.60   112.10     14 <
   5  10 -20     1.78    -9.10   118.90     14 <
   6   5  21     0.07    -5.40   112.10     14 <
   6   5  22     3.06    -5.10   112.10     14 <
   6   5  23     0.12   -15.40   118.50     14 <
   6   6  14     4.82    49.20   124.50     14 <
   6   6  15    23.80   -27.10   125.40     14 <
   6   6  16     2.35    -0.20   112.10     14 <
   6   7   7    10.40    18.20   126.70     14 <
   6   7   8     1.53    88.10   127.70     14 <
   6   8   0    55.98    -0.30   127.20     14 <
   6   8   1     9.57    52.90   130.60     14 <
   6   8   2     4.17   -30.80   123.20     14 <
   6   9  -6    11.25   -23.50   124.40     14 <
   6   9  -5     2.08   -29.40   125.50     14 <
   6  10 -13     8.22    32.30   129.70     14 <
   6  10 -12     4.26    -7.10   125.50     14 <
   6  10 -11     0.11    -1.60   112.10     14 <
   6  11 -19     2.47   -18.40   125.20     14 <
   6  11 -18     0.35    32.20   123.00     14 <
   6  11 -17     2.78    13.10   120.80     14 <
   7   7  17     0.56    96.50   128.10     14 <
   7   7  18     1.26    -8.90   129.10     14 <
   7   7  19     0.33   129.80   131.50     14 <
   7   8  10     1.32    -9.60   127.50     14 <
   7   8  11     0.91   -29.50   133.40     14 <
   7   9   3     6.21   -33.80   129.40     14 <
   7   9   4    22.40   -11.30   112.10     14 <
   7  10  -4    27.97   -11.40   128.20     14 <
   7  10  -3    20.78    20.20   124.60     14 <
   7  10  -2     2.78   -22.00   125.00     14 <
   7  11 -10     1.22    44.90   125.20     14 <
   7  11  -9     5.08   -22.70   131.80     14 <
   7  12 -15     3.39     3.80   129.50     14 <
  -7  -8  -3    25.96    33.30   137.80     16 <
  -7  -8  -2     0.02    -9.40   140.00     16 <
  -7  -8  -1     2.87   176.20   139.70     16 <
  -7  -7 -12    93.66    -9.60   141.80     16 <
  -7  -7 -11     5.33   -40.20   140.90     16 <
  -7  -7 -10    42.39   120.20   141.50     16 <
  -7  -6 -20     3.15   -45.10   138.90     16 <
  -7  -6 -19     6.24   -37.90   140.80     16 <
  -7  -6 -18    17.28   -33.20   112.10     16 <
  -6  -9  17     6.91   -25.60   138.10     16 <
  -6  -9  18     0.25    98.90   141.10     16 <
  -6  -9  19     2.01   101.80   147.00     16 <
  -6  -9  20     0.57    23.60   142.40     16 <
  -6  -8   7     6.43    71.80   138.10     16 <
  -6  -8   8     2.75    17.90   137.20     16 <
  -6  -8   9     1.99    35.70   138.80     16 <
  -6  -8  10   124.25   234.60   144.30     16 <
  -6  -7  -2    73.95   -49.80   132.50     16 <
  -6  -7  -1     9.53   -13.80   137.30     16 <
  -6  -6 -10     5.93    -7.80   131.60     16 <
  -6  -6  -9     0.21    18.50   133.10     16 <
  -6  -5 -19     7.95   -33.30   136.40     16 <
  -6  -5 -18    10.64    74.80   134.90     16 <
  -6  -5 -17    23.47    13.10   133.80     16 <
  -6  -4 -25     3.88     6.70   131.90     16 <
  -6  -4 -24     0.50   -11.50   112.10     16 <
  -5  -8  19    16.93     0.50   112.10     16 <
  -5  -8  20     0.11    94.70   136.20     16 <
  -5  -8  21    51.57    68.10   138.00     16 <
  -5  -8  22     1.47    54.40   138.90     16 <
  -5  -7   9   199.39   -29.20   136.40     16 <
  -5  -7  10   151.31   107.00   135.60     16 <
  -5  -7  11   124.45    38.30   150.60     16 <
  -5  -6   1    48.50    37.40   145.80     16 <
  -5  -5  -9    18.53    -7.80   135.40     16 <
  -5  -5  -8    86.23    41.20   141.10     16 <
  -5  -4 -17     3.55   -33.60   134.70     16 <
  -5  -4 -16    85.72   -16.20   135.20     16 <
  -5  -3 -25     1.79    -4.80   112.10     16 <
  -5  -3 -24    18.18    -8.80   122.50     16 <
  -5  -3 -23    30.72     5.80   134.00     16 <
  -4  -7  20    15.97   192.30   132.70     16 <
  -4  -7  21     0.86    34.20   138.90     16 <
  -4  -7  22     7.66   -22.00   131.50     16 <
  -4  -7  23     9.76    43.00   127.90     16 <
  -4  -6  11   283.21   229.00   162.60     16 <
  -4  -6  12    35.05    24.60   148.40     16 <
  -4  -5   2     3.37    25.00   152.10     16 <
  -4  -5   3   329.78   280.20   164.50     16 <
  -4  -4  -7     3.33   172.90   140.90     16 <
  -4  -4  -6    60.70    82.90   135.90     16 <
  -4  -3 -16   391.82   -17.10   112.10     16 <
  -4  -3 -15    31.94   -44.10   131.90     16 <
  -4  -3 -14    16.69     0.10   134.10     16 <
  -4  -2 -24     2.08    37.40   126.20     16 <
  -4  -2 -23    32.00    23.80   130.20     16 <
  -4  -2 -22     7.12    15.60   131.50     16 <
  -4  -1 -30     0.23   -26.30   127.00     16 <
  -4  -1 -29     0.73   -15.20   126.20     16 <
  -3  -6  22     0.18   -21.00   134.80     16 <
  -3  -6  23     7.83    74.20   131.70     16 <
  -3  -6  24    14.78   -29.20   130.30     16 <
  -3  -5  13   320.10    21.90   172.00     16 <
  -3  -5  14  1674.80  2036.80   159.60     16 o
  -3  -4   3   295.08   262.80   210.50     16 <
  -3  -4   4  4085.20  3227.50   207.70     16 o
  -3  -3  -5   364.57   117.90   162.80     16 <
  -3  -2 -14   518.38   205.90   142.70     16 <
  -3  -2 -13   234.30   147.40   159.10     16 <
  -3  -1 -22    32.87   -27.60   129.50     16 <
  -3  -1 -21    24.03   -37.00   130.60     16 <
  -3   0 -30    37.91    61.20   126.30     16 <
  -3   0 -29    20.62    91.20   128.40     16 <
  -3   0 -28    17.08   122.70   131.80     16 <
  -2  -5  24    11.93    -5.90   133.90     16 <
  -2  -4  14   113.71    74.00   146.00     16 <
  -2  -4  15    81.97   156.70   143.20     16 <
  -2  -4  16    40.51   -34.10   140.60     16 <
  -2  -3   5   293.15   209.60   306.70     16 <
  -2  -3   6  9712.20 14267.00   271.10     16 o
  -2  -2  -4   700.73   885.50   249.40     16 o
  -2  -1 -12    52.22   -23.10   151.60     16 <
  -2   0 -21    34.43   -17.60   125.40     16 <
  -2   0 -20   718.26   -46.00   112.10     16 <
  -2   1 -29     2.43    66.40   129.50     16 <
  -2   1 -28     2.37    25.70   128.70     16 <
  -2   1 -27     1.69    14.20   128.20     16 <
  -1  -3  16   105.66   107.90   150.60     16 <
  -1  -3  17    17.39    42.30   143.10     16 <
  -1  -3  18    21.90   -43.30   132.70     16 <
  -1  -2   7  3978.40  3001.20   266.80     16 o
  -1  -1  -2  3018.80  2445.10   373.50     16 o
  -1   0 -11   395.34  1725.70   196.10     16 o
  -1   0 -10  1288.60   450.70   237.90     16 <
  -1   1 -19   244.64   -28.10   130.80     16 <
  -1   1 -18   148.93   138.60   132.00     16 <
  -1   2 -27     2.74    -3.70   126.20     16 <
  -1   2 -26     2.33   -20.50   127.00     16 <
  -1   2 -25    18.67    41.30   129.10     16 <
   0  -2  18   653.93   698.10   144.20     16 o
   0  -2  19    25.23    -2.70   147.40     16 <
   0  -2  20  2127.90  3032.60   168.30     16 o
   0  -1   9   813.10   126.50   220.20     16 <
   0   1  -9   839.29  1133.80   236.90     16 o
   0   2 -17    94.57    22.00   146.20     16 <
   0   2 -16   677.50   383.00   148.60     16 <
   0   3 -26    90.87   -16.30   129.40     16 <
   0   3 -25     8.23    -6.20   134.00     16 <
   0   3 -24    47.95    82.20   131.10     16 <
   1  -1  20    84.62    14.40   139.60     16 <
   1  -1  21     8.44    24.50   135.90     16 <
   1  -1  22    53.48   -35.80   134.40     16 <
   1  -1  23     7.18   -35.10   128.80     16 <
   1   0  11   468.74   394.10   191.50     16 <
   1   0  12    32.78   253.10   171.70     16 <
   1   1   2  3072.00  1088.20   355.40     16 o
   1   2  -7  3935.60  6460.30   277.00     16 o
   1   3 -16   105.11   -44.80   137.70     16 <
   1   3 -15   256.45   162.40   135.90     16 <
   1   4 -24     0.78   -10.50   130.20     16 <
   1   4 -23     2.85    53.10   129.00     16 <
   1   4 -22     7.72     8.10   128.80     16 <
   1   5 -30     0.89   -13.00   123.00     16 <
   1   5 -29     7.23     2.80   126.60     16 <
   2   0  23   159.23   -15.50   131.00     16 <
   2   0  24    61.88   -29.00   129.50     16 <
   2   0  25     0.14     2.70   126.70     16 <
   2   1  13    49.95    16.90   146.00     16 <
   2   1  14   237.30   252.30   137.30     16 <
   2   2   4   729.59   552.20   327.10     16 <
   2   3  -5   301.04   366.40   242.20     16 <
   2   4 -14   115.29   -46.70   128.60     16 <
   2   4 -13    47.31   -26.10   127.10     16 <
   2   5 -22   195.35     9.60   128.80     16 <
   2   5 -21    32.95   -20.50   130.40     16 <
   2   5 -20     0.83    -5.70   112.10     16 <
   2   6 -30     1.59     8.80   125.80     16 <
   2   6 -29    12.87   -25.70   125.50     16 <
   2   6 -28    10.93   -14.20   126.80     16 <
   3   1  25    13.90    62.10   129.20     16 <
   3   2  15   239.92    37.40   152.80     16 <
   3   2  16   689.62   678.20   146.50     16 o
   3   2  17    49.97     6.90   146.90     16 <
   3   3   6   604.37   230.10   149.90     16 <
   3   3   7   181.91    29.40   155.10     16 <
   3   4  -3   336.01   412.90   191.60     16 <
   3   4  -2   221.54   157.20   177.90     16 <
   3   5 -12   737.44  1053.10   186.70     16 o
   3   5 -11  2599.20  1862.40   184.10     16 o
   3   6 -20     7.26   -24.70   127.00     16 <
   3   6 -19    21.96   -16.90   131.00     16 <
   3   6 -18   213.12   124.00   129.60     16 <
   3   7 -28     3.52   -24.70   128.20     16 <
   3   7 -27    22.66   -15.30   127.10     16 <
   3   7 -26     0.11    -1.00   126.30     16 <
   4   3  17     5.82   -13.80   127.10     16 <
   4   3  18    88.24    85.70   134.20     16 <
   4   3  19    35.06     7.90   134.30     16 <
   4   3  20    17.59    25.90   135.50     16 <
   4   4   8     7.02    46.00   135.30     16 <
   4   4   9    10.97   -24.90   138.60     16 <
   4   5  -1   102.08   190.30   147.30     16 <
   4   6 -10  1631.80  2739.80   161.80     16 o
   4   6  -9   374.87    55.60   166.50     16 <
   4   6  -8   149.29   133.90   144.90     16 <
   4   7 -18     8.36    94.40   130.60     16 <
   4   7 -17     6.44   -41.80   131.00     16 <
   4   7 -16    25.18    54.50   133.20     16 <
   4   8 -26     7.81   -29.80   124.00     16 <
   4   8 -25     4.59    38.20   128.50     16 <
   4   8 -24     2.20   -23.50   128.20     16 <
   5   4  20    59.49    12.10   125.10     16 <
   5   4  21     0.14   -20.40   125.20     16 <
   5   4  22     6.85   -19.00   125.10     16 <
   5   4  23     0.27   -23.80   127.70     16 <
   5   5  10     0.89   -16.30   146.30     16 <
   5   5  11   988.99   755.10   154.40     16 o
   5   5  12   478.53   130.80   161.10     16 <
   5   6   1    50.97    63.00   130.80     16 <
   5   6   2   101.19   -11.20   130.40     16 <
   5   6   3   295.27     8.00   131.60     16 <
   5   7  -8    38.44   -24.40   138.50     16 <
   5   7  -7   224.45   119.80   143.40     16 <
   5   7  -6   665.66   512.70   142.80     16 o
   5   8 -16    80.58   -13.30   131.20     16 <
   5   8 -15   346.65    71.70   127.30     16 <
   5   8 -14     8.03    61.20   134.40     16 <
   5   9 -24     5.54   -25.20   129.50     16 <
   5   9 -23     0.54     7.00   126.60     16 <
   5   9 -22     0.41    21.60   128.00     16 <
   6   5  22     7.44   -29.60   127.20     16 <
   6   5  23     0.11     3.70   126.80     16 <
   6   5  24     0.11    64.80   129.30     16 <
   6   5  25     0.02   -26.20   126.90     16 <
   6   6  13     6.28    28.50   133.30     16 <
   6   6  14     8.72    94.00   133.20     16 <
   6   6  15    45.96   -22.80   126.20     16 <
   6   7   4    37.73   -23.20   132.10     16 <
   6   7   5     0.50    41.30   133.40     16 <
   6   8  -5    11.95    50.00   132.40     16 <
   6   8  -4     4.84    -4.80   112.10     16 <
   6   8  -3    10.14    19.20   133.10     16 <
   6   9 -14     1.19    37.00   126.90     16 <
   6   9 -13     0.84   -23.60   126.20     16 <
   6   9 -12     0.43   -25.70   131.30     16 <
   6  10 -21     2.25   -33.00   128.60     16 <
   6  10 -20     9.41    52.80   136.10     16 <
   6  10 -19     0.97   137.60   137.70     16 <
   7   7  15     2.21   -40.20   131.40     16 <
   7   7  16     3.28   -43.40   127.00     16 <
   7   7  17     0.20   -38.80   129.60     16 <
   7   7  18     2.99   -26.20   128.50     16 <
   7   8   6    57.31   -26.70   134.90     16 <
   7   8   7     0.31    28.20   135.00     16 <
   7   8   8    19.41    39.60   134.70     16 <
   7   9  -3    12.83   108.30   136.40     16 <
   7   9  -2     0.16   -26.00   132.40     16 <
   7   9  -1     2.85   -12.20   132.40     16 <
   7  10 -12     2.35   -33.20   133.60     16 <
   7  10 -11     5.08   -55.50   134.90     16 <
   7  10 -10    10.21    41.30   136.00     16 <
   7  10  -9    14.29   -41.30   132.40     16 <
  -7  -9   8    38.62     8.60   145.70     17 <
  -7  -9   9    11.29   120.50   147.30     17 <
  -7  -9  10     5.56   176.10   147.40     17 <
  -7  -9  11    12.30    37.70   146.60     17 <
  -7  -8  -1     4.21   -70.60   139.70     17 <
  -7  -8   1    14.33   -10.30   139.10     17 <
  -7  -7 -10    23.19     7.80   142.80     17 <
  -7  -7  -9    14.58   -17.10   144.20     17 <
  -7  -7  -8    36.03   -61.00   134.30     17 <
  -7  -7  -7    13.74   -46.70   142.00     17 <
  -7  -6 -18    29.46   173.00   141.90     17 <
  -7  -6 -17    13.85   -41.20   135.50     17 <
  -7  -6 -16     2.49   -11.00   143.40     17 <
  -6  -9  19     9.60   -34.80   135.80     17 <
  -6  -9  20    13.84   -37.80   132.10     17 <
  -6  -9  21    16.42   -53.80   131.90     17 <
  -6  -9  22     0.76    25.10   130.60     17 <
  -6  -8   9    87.99    70.40   141.00     17 <
  -6  -8  10   109.96   143.30   145.30     17 <
  -6  -8  11    55.84    37.80   144.60     17 <
  -6  -8  12     7.61   165.60   143.30     17 <
  -6  -7   1    56.46    -4.50   139.20     17 <
  -6  -7   2    70.92   162.70   140.60     17 <
  -6  -6  -9     5.10    -9.50   134.70     17 <
  -6  -6  -8    21.20    91.60   132.50     17 <
  -6  -6  -7    16.01     9.10   137.70     17 <
  -6  -5 -17    29.77   -42.70   129.30     17 <
  -6  -5 -16    45.60   -15.70   128.40     17 <
  -6  -5 -15     6.75   -22.10   135.80     17 <
  -6  -4 -25     6.93   149.30   131.00     17 <
  -6  -4 -24     1.40   173.00   135.70     17 <
  -6  -4 -23     8.76   -34.70   126.10     17 <
  -5  -8  20     7.69   123.40   136.30     17 <
  -5  -8  21    25.55   -15.40   131.10     17 <
  -5  -8  22     3.06   -26.90   130.20     17 <
  -5  -8  23    19.11    -4.80   112.10     17 <
  -5  -8  24     2.47    15.00   131.70     17 <
  -5  -7  11    88.95   166.10   150.80     17 <
  -5  -7  12   334.08   138.90   148.50     17 <
  -5  -7  13    19.99   -35.30   144.00     17 <
  -5  -6   2   173.48    95.70   149.70     17 <
  -5  -6   3   130.22    23.80   141.30     17 <
  -5  -5  -7    57.30   150.40   133.60     17 <
  -5  -5  -6    20.68   -31.70   157.20     17 <
  -5  -4 -16    85.98   -13.00   127.80     17 <
  -5  -4 -15    30.27     3.60   129.10     17 <
  -5  -4 -14    72.48    23.60   135.80     17 <
  -5  -3 -24    18.69   -20.70   127.70     17 <
  -5  -3 -23    47.65    49.10   133.90     17 <
  -5  -3 -22   184.24   102.20   130.50     17 <
  -4  -7  22    15.43    12.40   130.00     17 <
  -4  -7  23    30.40   -36.10   130.50     17 <
  -4  -7  24    31.55    -7.20   129.50     17 <
  -4  -6  12   110.35     4.50   150.70     17 <
  -4  -6  13   111.93   186.00   148.10     17 <
  -4  -6  14   194.93   646.90   166.00     17 o
  -4  -5   3   381.83    99.90   174.20     17 <
  -4  -5   4  1838.70  2316.90   170.50     17 o
  -4  -4  -6    81.02    58.10   138.90     17 <
  -4  -4  -5    21.62   -56.10   140.40     17 <
  -4  -3 -15    38.73   -15.70   112.10     17 <
  -4  -3 -14    22.54    93.50   130.90     17 <
  -4  -3 -13   194.09    72.00   149.10     17 <
  -4  -2 -23    41.48     8.90   127.10     17 <
  -4  -2 -22     5.90   -12.00   128.30     17 <
  -4  -2 -21    18.02   -34.70   128.00     17 <
  -4  -1 -30     2.69   -16.70   129.00     17 <
  -4  -1 -29     6.33     4.80   127.30     17 <
  -4  -1 -28    19.90    -0.80   112.10     17 <
  -3  -6  23    46.88    99.70   132.90     17 <
  -3  -6  24     4.71   -19.50   133.40     17 <
  -3  -5  14  1013.60   829.90   147.60     17 o
  -3  -5  15    40.45    14.80   151.50     17 <
  -3  -4   4  2109.50  2456.60   225.60     17 o
  -3  -4   5  2263.20  2135.40   236.80     17 o
  -3  -3  -4    94.49   103.30   156.60     17 <
  -3  -2 -13   207.50    79.50   158.60     17 <
  -3  -2 -12   203.74   230.00   160.50     17 <
  -3  -1 -22    67.22    28.80   131.60     17 <
  -3  -1 -21    49.76    -0.30   112.10     17 <
  -3  -1 -20    10.18    -1.40   112.10     17 <
  -3   0 -30    24.26     1.60   131.60     17 <
  -3   0 -29    67.21   -19.50   127.00     17 <
  -3   0 -28    33.29    28.20   125.50     17 <
  -3   0 -27     2.65    46.70   129.40     17 <
  -2  -4  15   104.46   228.80   137.70     17 <
  -2  -4  16    57.85   -31.00   143.50     17 <
  -2  -4  17    89.37    85.40   140.20     17 <
  -2  -3   6  5099.00  6206.90   279.20     17 o
  -2  -2  -3  3115.60  3594.40   277.40     17 o
  -2  -1 -12   141.39   143.40   161.90     17 <
  -2  -1 -11   756.57   619.20   178.50     17 o
  -2   0 -20   313.95   -30.10   134.80     17 <
  -2   0 -19   177.35   160.80   174.80     17 <
  -2   1 -28    10.40    25.50   133.80     17 <
  -2   1 -27     6.67   -13.10   131.00     17 <
  -2   1 -26    20.35    24.30   127.60     17 <
  -1  -3  17    47.90    38.90   140.30     17 <
  -1  -3  18    75.19   -14.40   139.10     17 <
  -1  -2   8  1319.20   147.80   239.20     17 <
  -1   0 -10   544.52   589.20   242.10     17 <
  -1   1 -19   298.27   -23.40   133.80     17 <
  -1   1 -18   110.94    47.70   131.50     17 <
  -1   2 -27    13.35   -16.20   125.60     17 <
  -1   2 -26    24.41   -28.60   125.40     17 <
  -1   2 -25    18.05   -21.30   128.20     17 <
   0  -2  18   557.03   810.60   143.90     17 o
   0  -2  19    14.53    -2.30   167.10     17 <
   0  -2  20  1175.40  1234.20   154.00     17 o
   0  -1   9  1024.00   345.30   232.40     17 <
   0   1  -9  1043.70   631.60   235.30     17 <
   0   2 -17    94.94    53.90   149.00     17 <
   0   2 -16   633.33   712.90   154.00     17 o
   0   3 -26    70.31    28.50   128.00     17 <
   0   3 -25    16.22   -10.80   128.50     17 <
   0   3 -24    62.34    -1.10   130.80     17 <
   1  -1  20    76.62    31.40   149.60     17 <
   1  -1  21    28.18    -5.40   137.70     17 <
   1  -1  22    40.13    51.70   132.90     17 <
   1   0  11   463.07   788.00   186.40     17 o
   1   2  -7  2794.40  2784.00   275.90     17 o
   1   3 -16    62.67   133.70   143.10     17 <
   1   3 -15   334.17    74.90   140.10     17 <
   1   4 -24    18.40   -33.50   131.20     17 <
   1   4 -23     6.33    19.20   125.40     17 <
   1   4 -22    33.71   -16.90   133.10     17 <
   1   5 -30     4.83   -15.00   128.80     17 <
   2   0  22    97.54    73.30   140.30     17 <
   2   0  23    52.47    -1.00   133.90     17 <
   2   0  24    29.62    54.60   131.50     17 <
   2   1  12   141.45     3.50   148.30     17 <
   2   1  13    64.52    22.00   145.50     17 <
   2   2   3  3420.00  3649.00   262.40     17 o
   2   3  -6  7044.30  6871.80   254.00     17 o
   2   3  -5   271.47   198.40   270.20     17 <
   2   4 -14   108.93   102.30   143.10     17 <
   2   4 -13   172.62   128.40   141.10     17 <
   2   5 -23   122.54    80.40   132.00     17 <
   2   5 -22    61.03   -33.60   130.10     17 <
   2   5 -21    58.66     4.50   131.30     17 <
   2   6 -30    14.18   -22.30   129.00     17 <
   2   6 -29    14.27   -28.70   124.10     17 <
   2   6 -28     9.58    57.10   124.90     17 <
   3   1  24   103.94    28.30   126.80     17 <
   3   1  25    12.13    39.80   131.40     17 <
   3   2  14   392.94   180.10   148.80     17 <
   3   2  15   144.84    -2.60   112.10     17 <
   3   2  16   571.27   296.20   138.60     17 <
   3   3   5   280.46   111.90   166.20     17 <
   3   3   6   645.44   107.40   153.90     17 <
   3   4  -4  1595.80  1253.80   229.90     17 o
   3   4  -3   207.83   209.90   207.30     17 <
   3   5 -13   334.53    84.00   175.10     17 <
   3   5 -12   296.02   182.00   176.60     17 <
   3   6 -21    37.42    19.50   133.40     17 <
   3   6 -20    11.11    53.90   132.50     17 <
   3   6 -19   130.33    15.60   141.10     17 <
   3   7 -29     8.14    -0.10   123.50     17 <
   3   7 -28     4.12    38.10   129.70     17 <
   3   7 -27     7.74    59.10   127.00     17 <
   4   3  16   347.35   546.20   139.60     17 o
   4   3  17    12.98   -12.90   141.60     17 <
   4   3  18    71.24    68.10   133.10     17 <
   4   4   7    21.33   -19.50   127.10     17 <
   4   4   8    11.96   -38.20   132.30     17 <
   4   5  -2    37.26   -33.90   141.60     17 <
   4   5  -1    97.16   171.10   144.60     17 <
   4   6 -11   123.30   141.30   155.50     17 <
   4   6 -10  1138.60  1217.50   159.90     17 o
   4   7 -19    18.44    18.40   127.80     17 <
   4   7 -18    40.84    20.40   128.00     17 <
   4   8 -27     3.76    -2.40   123.30     17 <
   4   8 -26    10.34     3.40   122.70     17 <
   4   8 -25    19.86   -14.00   126.20     17 <
   5   4  18    12.10    -3.90   127.40     17 <
   5   4  19    32.28   -39.10   124.80     17 <
   5   4  20    59.03    13.80   132.50     17 <
   5   4  21     4.40   -31.80   127.90     17 <
   5   5   9    36.67    65.40   133.90     17 <
   5   5  10     5.38    39.40   131.20     17 <
   5   6   1    30.80   114.10   141.40     17 <
   5   7  -9   131.56    13.30   134.60     17 <
   5   7  -8    27.69    11.60   137.20     17 <
   5   8 -17    71.67   -25.00   126.80     17 <
   5   8 -16    48.15    13.40   134.70     17 <
   5   9 -25     2.16    -9.40   123.80     17 <
   5   9 -24    19.33     9.30   129.40     17 <
   5   9 -23     4.31   -16.10   128.40     17 <
   6   5  20     4.35   -41.80   124.00     17 <
   6   5  21     1.02    15.10   130.50     17 <
   6   5  22    11.76   185.10   136.70     17 <
   6   5  23     1.18    82.50   136.70     17 <
   6   5  24     1.61   -35.40   130.30     17 <
   6   6  11    29.80    70.30   129.30     17 <
   6   6  12     4.28   -24.40   133.50     17 <
   6   6  13     4.86    -7.70   132.50     17 <
   6   7   1     9.61   -19.10   132.10     17 <
   6   7   2    77.80   -28.20   131.00     17 <
   6   7   3     3.75     7.30   131.40     17 <
   6   8  -7     2.59   140.60   133.30     17 <
   6   8  -6    15.31   -14.40   136.50     17 <
   6   8  -5    41.40   107.30   128.40     17 <
   6   9 -16    76.39   -32.30   130.20     17 <
   6   9 -15    22.90     5.30   129.10     17 <
   6   9 -14    10.30    -0.10   112.10     17 <
   6   9 -13     4.86    17.90   132.30     17 <
   6  10 -21     0.57   -11.40   126.60     17 <
   7   7  13     4.50   -16.60   131.80     17 <
   7   7  14     1.16     7.60   132.40     17 <
   7   7  15     1.11    12.50   134.50     17 <
   7   7  16    20.93   -36.40   137.90     17 <
   7   8   3    21.77    39.20   134.90     17 <
   7   8   4    24.75   -27.00   132.00     17 <
   7   8   5   105.82    21.70   132.70     17 <
   7   8   6    78.03   -23.90   130.60     17 <
   7   9  -5    16.21   -10.50   133.40     17 <
   7   9  -4     7.10   100.80   130.30     17 <
   7   9  -3    10.51   -39.80   131.90     17 <
   7  10 -14    18.84   -44.30   131.50     17 <
   7  10 -13    12.85    77.10   129.90     17 <
   7  10 -12     8.90    -0.10   133.60     17 <
   7  10 -11    15.17    96.20   136.10     17 <
  -7  -9  11     2.11   -57.00   133.90     18 <
  -7  -9  12     1.47   -43.10   132.60     18 <
  -7  -9  13     2.22   -67.30   132.40     18 <
  -7  -9  14     0.35   -67.70   138.30     18 <
  -7  -8   1     6.84   -53.90   138.60     18 <
  -7  -8   2     2.88    92.90   136.50     18 <
  -7  -8   3    16.52   -27.50   137.60     18 <
  -7  -7  -9     7.62     9.10   142.00     18 <
  -7  -7  -8     2.95   -34.70   138.60     18 <
  -7  -7  -7    17.78   -54.90   141.70     18 <
  -7  -6 -18     9.21   -19.30   136.70     18 <
  -7  -6 -17     3.88    71.60   142.10     18 <
  -7  -6 -16     7.25    -4.40   137.70     18 <
  -6  -8  12     2.17    41.30   133.90     18 <
  -6  -8  13     4.08    -4.30   112.10     18 <
  -6  -8  14     1.35    78.80   130.30     18 <
  -6  -8  15     3.17   131.70   140.10     18 <
  -6  -7   2    37.48   -34.60   133.30     18 <
  -6  -7   3     1.37   -21.10   136.30     18 <
  -6  -7   4    76.28   -69.90   133.10     18 <
  -6  -6  -8    16.23   -28.40   133.30     18 <
  -6  -6  -7    25.85   -23.80   130.40     18 <
  -6  -6  -6     5.21   -32.70   132.90     18 <
  -6  -5 -17    18.63    30.60   131.40     18 <
  -6  -5 -16    29.29    38.80   131.50     18 <
  -6  -5 -15     7.51    39.20   130.10     18 <
  -6  -4 -25     2.78   -17.20   130.00     18 <
  -6  -4 -24     1.79    18.80   128.90     18 <
  -5  -8  24     0.32   -15.40   125.70     18 <
  -5  -7  13     8.25   -21.40   144.90     18 <
  -5  -7  14    48.33   183.10   134.10     18 <
  -5  -7  15     0.88    23.80   137.50     18 <
  -5  -7  16     4.34    25.80   135.80     18 <
  -5  -6   3   160.72    41.70   129.90     18 <
  -5  -6   4    10.36   -34.70   153.40     18 <
  -5  -5  -7    49.33    -5.90   129.20     18 <
  -5  -5  -6     4.98    -6.70   141.70     18 <
  -5  -5  -5   357.19   342.10   180.50     18 <
  -5  -4 -16    51.22    -7.60   124.70     18 <
  -5  -4 -15    25.58   -27.60   125.90     18 <
  -5  -3 -25     1.34   -39.00   125.80     18 <
  -5  -3 -24    17.10    50.00   130.10     18 <
  -5  -3 -23    14.62    38.30   129.40     18 <
  -4  -6  14   162.88   448.10   146.80     18 o
  -4  -6  15   247.35   138.90   146.70     18 <
  -4  -6  16    13.97     3.40   138.70     18 <
  -4  -6  17    32.34    -2.40   112.10     18 <
  -4  -5   4  1259.50  2003.70   168.40     18 o
  -4  -5   5    36.26    -5.60   164.50     18 <
  -4  -4  -6    28.13    -7.70   132.50     18 <
  -4  -4  -5     2.65    -3.70   112.10     18 <
  -4  -3 -15    36.36    20.00   132.50     18 <
  -4  -3 -14    13.45    77.40   142.00     18 <
  -4  -2 -24     5.66   -12.30   126.90     18 <
  -4  -2 -23    15.37   -26.50   125.90     18 <
  -4  -2 -22     6.72     2.20   125.90     18 <
  -4  -1 -30     1.03     9.60   125.40     18 <
  -3  -5  16    13.59    22.40   129.40     18 <
  -3  -5  17    96.50   -38.00   127.50     18 <
  -3  -5  18    17.12   -12.10   112.10     18 <
  -3  -4   6  1307.20  1676.20   201.70     18 o
  -3  -3  -4    66.36    77.60   166.30     18 <
  -3  -2 -14   217.25   230.70   149.80     18 <
  -3  -2 -13   104.33   163.60   141.30     18 <
  -3  -1 -23    15.76    87.30   129.20     18 <
  -3  -1 -22    30.45   -25.50   128.20     18 <
  -3  -1 -21    21.61   -35.90   131.60     18 <
  -3   0 -31     9.33    35.00   126.30     18 <
  -3   0 -30    23.40   113.90   123.40     18 <
  -3   0 -29    16.34     4.90   122.90     18 <
  -2  -4  17    58.34    15.60   132.10     18 <
  -2  -4  18    34.89    23.40   134.40     18 <
  -2  -4  19    73.06    86.60   151.70     18 <
  -2  -3   7  4243.10  5125.20   306.00     18 o
  -2  -3   8  1079.40   683.20   228.50     18 <
  -2  -2  -3  2145.10  2088.00   259.50     18 o
  -2  -1 -13    37.33    49.90   146.40     18 <
  -2  -1 -12    13.59   113.60   149.50     18 <
  -2   0 -22   103.97    21.70   128.80     18 <
  -2   0 -21    11.58     3.90   143.40     18 <
  -2   0 -20   435.45   614.20   139.30     18 o
  -2   1 -30     6.61    26.70   127.60     18 <
  -2   1 -29     3.70    32.00   126.50     18 <
  -2   1 -28     2.74   -29.30   125.90     18 <
  -1  -3  19   142.96    38.90   126.80     18 <
  -1  -3  20    18.82    34.60   138.30     18 <
  -1  -3  21    54.76    -3.60   112.10     18 <
  -1  -2   9  1001.30   859.40   206.70     18 o
  -1   0 -11   220.99   316.50   190.40     18 <
  -1   1 -20    48.94     7.40   133.50     18 <
  -1   1 -19    87.37   267.90   143.50     18 <
  -1   2 -29     7.89    -3.30   112.10     18 <
  -1   2 -28     9.02    -9.50   120.60     18 <
  -1   2 -27     4.05   -19.60   125.70     18 <
   0  -2  20  1034.60  1328.40   148.60     18 o
   0  -2  21    50.32   261.60   154.20     18 <
   0  -2  22    27.38    -1.50   112.10     18 <
   0  -2  23   204.33   116.30   127.50     18 <
   0  -1  10   904.75   649.80   201.10     18 o
   0  -1  11   131.08   171.30   176.20     18 <
   0   1 -10   995.28   578.80   194.50     18 <
   0   1  -9   517.15   708.60   222.90     18 o
   0   2 -19    11.72    36.80   165.70     18 <
   0   2 -18   397.35   792.60   140.90     18 o
   0   3 -28     9.76   -29.00   125.70     18 <
   0   3 -27    91.77    52.70   129.20     18 <
   0   3 -26    28.47    68.70   124.80     18 <
   1  -1  22    43.64   128.30   135.70     18 <
   1  -1  23     5.78    37.50   126.90     18 <
   1  -1  24     7.61    66.80   130.50     18 <
   1  -1  25     7.76    21.70   130.40     18 <
   1   0  12    28.78    82.40   164.80     18 <
   1   2  -8   357.10   853.60   262.40     18 o
   1   3 -18    15.18    89.00   136.50     18 <
   1   3 -17    44.10    12.60   138.40     18 <
   1   3 -16    67.94   239.30   144.70     18 <
   1   4 -27     7.87    -9.10   124.30     18 <
   1   4 -26     6.77    82.30   128.70     18 <
   1   4 -25    12.09    56.40   128.60     18 <
   2   0  24    34.07   -22.10   127.90     18 <
   2   0  25     7.33    50.00   126.60     18 <
   2   1  13    38.98    14.60   133.10     18 <
   2   1  14   140.59   -38.30   131.70     18 <
   2   1  15     7.71    10.50   157.80     18 <
   2   2   3  2126.80  1819.00   268.40     18 o
   2   3  -7  4577.60  5011.10   286.30     18 o
   2   3  -6  5672.50  5034.20   265.50     18 o
   2   4 -16    32.20    31.70   136.00     18 <
   2   4 -15    87.23   213.60   141.10     18 <
   2   5 -25     3.06    14.70   120.80     18 <
   2   5 -24     3.70   -19.80   122.70     18 <
   2   5 -23    79.48   127.80   140.10     18 <
   3   2  15   110.56    71.60   151.50     18 <
   3   2  16   343.49   457.90   136.30     18 o
   3   2  17    24.36    33.70   139.50     18 <
   3   3   5   170.02    26.50   153.20     18 <
   3   3   6   425.95    65.90   149.00     18 <
   3   4  -5  1217.00  2479.50   232.50     18 o
   3   4  -4  2085.70  2885.00   212.90     18 o
   3   5 -14   769.13   592.00   140.80     18 o
   3   5 -13   165.00    48.90   165.00     18 <
   3   6 -23     8.22   -23.80   120.70     18 <
   3   6 -22     3.82    81.30   125.70     18 <
   3   6 -21     7.30    -4.90   129.30     18 <
   3   7 -30     0.75     0.00   112.10     18 <
   3   7 -29     1.51   -13.10   123.70     18 <
   4   3  17     7.38    88.40   138.30     18 <
   4   3  18    43.81    49.70   133.90     18 <
   4   3  19    27.07    15.80   127.20     18 <
   4   4   7     8.15    61.80   132.30     18 <
   4   4   8     5.30    28.20   132.30     18 <
   4   5  -3   161.13    70.30   162.40     18 <
   4   5  -2    16.00   -15.10   145.20     18 <
   4   6 -13    91.44    28.60   139.30     18 <
   4   6 -12    16.86    17.80   142.20     18 <
   4   6 -11   170.14   203.40   167.50     18 <
   4   7 -22     4.65    16.40   123.40     18 <
   4   7 -21     2.54    -9.70   123.70     18 <
   4   7 -20     7.37   -26.20   122.90     18 <
   4   8 -28     1.10    73.50   125.90     18 <
   5   4  19    27.81   -17.60   122.10     18 <
   5   4  20    41.92    65.10   126.30     18 <
   5   4  21     1.83     0.20   112.10     18 <
   5   4  22     5.90    -9.10   125.20     18 <
   5   5   8    39.03   -15.90   121.80     18 <
   5   5   9     6.04    61.10   130.20     18 <
   5   5  10     4.76   -14.80   131.10     18 <
   5   6  -2    68.44   -18.90   131.20     18 <
   5   6  -1    39.68    -8.80   132.30     18 <
   5   7 -11    56.57    -2.70   112.10     18 <
   5   7 -10    64.51    93.00   125.40     18 <
   5   7  -9   132.15    17.20   129.40     18 <
   5   8 -20     4.67    -5.30   117.50     18 <
   5   8 -19     7.53    78.10   127.30     18 <
   5   8 -18    88.56   -31.20   124.20     18 <
   6   5  21     1.40     4.80   127.50     18 <
   6   5  22     5.09    77.80   130.10     18 <
   6   5  23     0.30   104.90   133.50     18 <
   6   5  24     0.44   -18.00   122.60     18 <
   6   5  25     0.27    53.90   125.00     18 <
   6   6  10     4.73   144.10   134.30     18 <
   6   6  11    16.22    74.60   130.70     18 <
   6   6  12     5.99   -42.80   128.40     18 <
   6   6  13     4.41    23.50   128.20     18 <
   6   7   1     4.55   -10.20   131.10     18 <
   6   7   2    32.36    49.20   132.20     18 <
   6   8  -9     8.53   -16.40   126.60     18 <
   6   8  -8     1.76    27.50   135.80     18 <
   6   8  -7     6.66   -30.30   132.40     18 <
   6   9 -18     2.96   -16.90   120.40     18 <
   6   9 -17     5.41    -6.20   122.40     18 <
   6   9 -16    12.08     5.80   127.70     18 <
   7   7  12    44.74   -31.00   128.10     18 <
   7   7  13     2.71    95.40   135.40     18 <
   7   7  14     1.51    15.40   135.30     18 <
   7   7  15     2.18   145.10   133.50     18 <
   7   7  16     7.81   -18.30   128.60     18 <
   7   8   2     0.66   -10.40   132.10     18 <
   7   8   3    19.08    -7.60   131.20     18 <
   7   8   4    16.13   -42.50   128.70     18 <
   7   8   5    65.25   -42.20   131.20     18 <
   7   9  -7     1.57   -31.10   135.80     18 <
   7   9  -6     0.40   -17.90   134.40     18 <
   7   9  -5     5.20    11.90   133.20     18 <
   7  10 -17     0.33    50.90   134.60     18 <
   7  10 -16     5.39   -13.90   132.90     18 <
   7  10 -15    12.67   101.20   134.20     18 <
   7  10 -14     2.65    92.70   136.40     18 <
  -7  -9  17     1.38    37.20   139.70     19 <
  -7  -9  18     2.92   159.90   142.30     19 <
  -7  -9  19     4.45    21.90   146.60     19 <
  -7  -8   5    76.50   223.50   139.80     19 <
  -7  -8   6    28.30    52.50   133.30     19 <
  -7  -8   7     2.70    -8.40   131.60     19 <
  -7  -8   8    75.68     0.30   112.10     19 <
  -7  -7  -6    36.97   -55.70   137.50     19 <
  -7  -7  -5    37.63   148.40   136.30     19 <
  -7  -7  -4    78.19   -20.00   142.10     19 <
  -7  -7  -3     9.22     0.90   134.80     19 <
  -7  -6 -17     3.78    93.50   131.40     19 <
  -7  -6 -16     5.82   -42.80   131.40     19 <
  -7  -6 -15    20.72   135.60   135.50     19 <
  -7  -6 -14    23.14   203.50   138.70     19 <
  -6  -8  17     1.58   -43.60   132.70     19 <
  -6  -8  18     2.16    57.40   133.20     19 <
  -6  -8  19     0.41    45.60   130.10     19 <
  -6  -8  20    14.83    72.00   135.70     19 <
  -6  -8  21     6.46   -32.40   132.00     19 <
  -6  -8  22     3.33   -19.20   128.40     19 <
  -6  -7   5    11.60    -8.50   142.40     19 <
  -6  -7   6    31.00    39.60   135.70     19 <
  -6  -7   7     7.14    53.60   133.80     19 <
  -6  -7   8     4.64   -38.80   132.50     19 <
  -6  -6  -6     2.91     1.00   112.10     19 <
  -6  -6  -5    92.61   183.20   137.70     19 <
  -6  -6  -4    15.11   -22.20   112.10     19 <
  -6  -6  -3    36.20    43.00   142.60     19 <
  -6  -5 -16    22.97   118.60   131.50     19 <
  -6  -5 -15     2.20    46.00   132.60     19 <
  -6  -5 -14     4.09    31.10   136.00     19 <
  -6  -4 -25     1.86    29.30   126.40     19 <
  -6  -4 -24     1.32   -10.90   125.10     19 <
  -6  -4 -23     2.95   -12.50   123.80     19 <
  -5  -7  18     5.49    94.60   129.10     19 <
  -5  -7  19    32.83    -7.10   128.20     19 <
  -5  -7  20     9.52    -6.40   130.10     19 <
  -5  -7  21    21.19    -5.10   131.20     19 <
  -5  -7  22    53.29   213.50   131.10     19 <
  -5  -6   6    52.54    26.60   157.00     19 <
  -5  -6   7    25.06   -20.00   149.20     19 <
  -5  -6   8   352.51   588.10   143.00     19 o
  -5  -5  -5   276.37   -24.60   112.10     19 <
  -5  -5  -4  1263.10  2010.50   159.50     19 o
  -5  -5  -3   120.93   225.60   192.20     19 <
  -5  -4 -16    47.76    58.20   134.00     19 <
  -5  -4 -15    32.39   -32.30   129.80     19 <
  -5  -4 -14     9.13    38.80   130.90     19 <
  -5  -4 -13    20.09   -32.00   132.10     19 <
  -5  -3 -25     3.50   -10.90   127.80     19 <
  -5  -3 -24     9.85    -7.90   130.30     19 <
  -5  -3 -23    21.25    -5.90   112.10     19 <
  -4  -6  19    13.31   101.90   130.50     19 <
  -4  -6  20     8.25    16.30   131.00     19 <
  -4  -6  21     3.82    66.70   128.30     19 <
  -4  -6  22     3.59    81.40   131.60     19 <
  -4  -6  23    33.94    37.20   132.20     19 <
  -4  -5   7   210.84   342.10   154.20     19 <
  -4  -5   8   116.93   192.50   146.10     19 <
  -4  -5   9    45.66   -24.50   141.40     19 <
  -4  -4  -4    49.20    83.20   132.70     19 <
  -4  -4  -3   118.50     5.80   148.90     19 <
  -4  -3 -15    34.27    28.90   129.80     19 <
  -4  -3 -14    11.02   -28.20   126.20     19 <
  -4  -3 -13   129.95    32.10   131.70     19 <
  -4  -2 -25     5.65   -13.90   123.10     19 <
  -4  -2 -24     1.51    -5.80   122.20     19 <
  -4  -2 -23    15.41    22.80   121.10     19 <
  -4  -2 -22     8.90   -13.90   121.80     19 <
  -3  -5  20    18.32   -11.50   112.10     19 <
  -3  -5  21    13.98    -8.30   112.10     19 <
  -3  -5  22   176.74    99.80   131.50     19 <
  -3  -5  23     9.38   -20.20   129.60     19 <
  -3  -4   8    36.88     9.50   140.10     19 <
  -3  -4   9    39.26    97.90   136.80     19 <
  -3  -3  -3   229.69   198.00   154.40     19 <
  -3  -3  -2   108.06   -58.20   154.40     19 <
  -3  -2 -14   230.86    93.00   139.20     19 <
  -3  -2 -13    81.52   220.10   132.40     19 <
  -3  -1 -24    53.67    31.00   124.10     19 <
  -3  -1 -23     5.12     7.60   126.30     19 <
  -3  -1 -22    14.20   -19.60   126.30     19 <
  -3   0 -31     7.00    10.40   125.60     19 <
  -2  -4  21    10.96    87.70   152.20     19 <
  -2  -4  22    39.02   176.70   137.50     19 <
  -2  -4  23    17.32    28.00   132.60     19 <
  -2  -4  24    62.09   -21.10   126.80     19 <
  -2  -3   9    56.06    83.00   175.00     19 <
  -2  -3  10   185.15   132.70   150.90     19 <
  -2  -2  -2  1883.70  1447.20   357.10     19 o
  -2  -1 -13    36.34   149.30   133.50     19 <
  -2  -1 -12    46.82     0.50   154.10     19 <
  -2   0 -23    60.49     2.50   126.10     19 <
  -2   0 -22    69.66    -1.10   127.70     19 <
  -2   0 -21    31.17    -3.50   112.10     19 <
  -2   1 -31     0.39    49.80   123.30     19 <
  -2   1 -30     6.85   -16.60   123.00     19 <
  -1  -3  22    47.98    89.60   135.60     19 <
  -1  -3  23    17.17    57.10   133.80     19 <
  -1  -3  24     3.75    -1.50   112.10     19 <
  -1  -2  10   150.84   237.10   188.50     19 <
  -1  -2  11   303.35   103.30   181.80     19 <
  -1  -1  -1 26839.00 24327.40   394.40     19 o
  -1   0 -12    41.64   143.80   164.20     19 <
  -1   0 -11   189.54   529.50   188.00     19 <
  -1   1 -22    32.69    77.90   129.80     19 <
  -1   1 -21    12.48    10.80   133.10     19 <
  -1   2 -31     3.77   -20.00   127.70     19 <
  -1   2 -30     0.90   -23.30   125.20     19 <
  -1   2 -29     5.70   -19.80   127.20     19 <
   0  -2  23   227.78   147.10   132.10     19 <
   0  -2  24     2.49    43.10   124.00     19 <
   0  -1  11   116.14   119.80   180.50     19 <
   0  -1  12    28.55   -34.40   156.40     19 <
   0   1 -11   100.01   -60.40   174.70     19 <
   0   1 -10  1045.70  1111.80   198.20     19 o
   0   2 -21    92.70   306.30   162.70     19 <
   0   2 -20   825.75  1477.20   151.60     19 o
   0   3 -30     1.32     9.60   129.00     19 <
   0   3 -29     3.35     5.70   123.80     19 <
   0   3 -28    20.78     2.70   127.30     19 <
   1  -1  24    15.44    46.70   127.70     19 <
   1  -1  25     6.70   -17.90   126.20     19 <
   1   0  12    51.23    -0.50   164.80     19 <
   1   0  13    76.69   121.80   147.30     19 <
   1   0  14   171.40    70.80   168.20     19 <
   1   1   1 29289.00 31876.30   414.00     19 o
   1   2 -10   142.26   328.30   196.80     19 <
   1   2  -9  1059.90  1197.30   213.10     19 o
   1   3 -20    11.48    31.30   134.60     19 <
   1   3 -19    43.97    65.60   126.10     19 <
   1   4 -30     3.98    23.10   124.20     19 <
   1   4 -29     1.21    13.70   123.80     19 <
   1   4 -28     3.31    16.50   127.00     19 <
   1   4 -27     1.72    43.10   126.30     19 <
   2   1  14   106.95   -11.40   112.10     19 <
   2   1  15    18.29    38.80   149.60     19 <
   2   2   2  2015.70  1627.90   300.20     19 o
   2   2   3  2683.40  2275.30   264.60     19 o
   2   3  -9    62.72    46.90   178.00     19 <
   2   3  -8   897.23  1338.90   232.10     19 o
   2   4 -19    80.32   194.60   162.40     19 <
   2   4 -18    55.73    78.30   132.10     19 <
   2   4 -17    42.07    11.90   130.80     19 <
   2   5 -29     0.44   -19.40   123.30     19 <
   2   5 -28     8.28   -27.00   126.10     19 <
   2   5 -27    30.69     2.60   124.30     19 <
   2   5 -26   110.44   -36.60   124.80     19 <
   3   2  15   156.87   195.30   153.80     19 <
   3   2  16   306.16    98.00   137.60     19 <
   3   2  17    20.37    98.30   140.90     19 <
   3   3   4    47.28   -77.00   148.40     19 <
   3   4  -7    31.04    81.90   166.50     19 <
   3   5 -18     4.28   101.90   130.40     19 <
   3   5 -17    51.26    -9.10   128.40     19 <
   3   5 -16    41.91   -14.70   128.10     19 <
   3   6 -28     0.40    60.30   124.50     19 <
   3   6 -27     7.12    -1.90   112.10     19 <
   3   6 -26    10.89   -18.70   126.60     19 <
   3   6 -25    17.37   -25.00   123.30     19 <
   4   3  16   128.42    69.90   136.10     19 <
   4   3  17    15.37     7.20   137.20     19 <
   4   3  18    48.22    97.70   127.40     19 <
   4   3  19    35.79     2.60   130.30     19 <
   4   4   5     4.35   162.40   137.90     19 <
   4   4   6    47.56    34.10   138.50     19 <
   4   5  -6    62.70    -0.60   137.70     19 <
   4   5  -5    34.75    50.70   161.60     19 <
   4   6 -17    29.87    45.70   128.10     19 <
   4   6 -16    17.34     6.90   138.10     19 <
   4   6 -15   258.80   366.00   147.10     19 <
   4   7 -26     5.26     0.30   117.80     19 <
   4   7 -25     1.32   -21.40   122.40     19 <
   4   7 -24     1.34    15.40   123.80     19 <
   5   4  18     3.88    -9.50   124.70     19 <
   5   4  19    19.66   -19.00   124.90     19 <
   5   4  20    25.11   -25.80   126.80     19 <
   5   4  21     0.54   -18.00   121.80     19 <
   5   4  22     4.44     6.30   125.10     19 <
   5   5   6     1.81   -46.90   147.10     19 <
   5   5   7    38.74    34.60   139.10     19 <
   5   5   8    57.00    -8.00   133.50     19 <
   5   6  -5   623.16  1187.60   162.40     19 o
   5   6  -4    12.44    32.00   154.80     19 <
   5   6  -3   227.55   171.30   136.70     19 <
   5   7 -15     1.35    16.50   129.60     19 <
   5   7 -14    43.94   -35.80   126.90     19 <
   5   7 -13    10.27   -22.90   135.90     19 <
   5   8 -25     5.82     6.20   123.60     19 <
   5   8 -24     0.77    52.50   123.50     19 <
   5   8 -23     4.35    -0.20   112.10     19 <
   5   8 -22     1.05    -4.10   112.10     19 <
   6   5  20     2.48    48.30   126.60     19 <
   6   5  21     1.39   114.10   125.00     19 <
   6   5  22     5.34   -18.50   128.50     19 <
   6   5  23     0.85    14.60   126.40     19 <
   6   5  24     0.92   -28.40   127.00     19 <
   6   6   8    19.29   -40.80   128.70     19 <
   6   6   9     7.83     3.90   124.80     19 <
   6   6  10     4.44   -33.80   130.60     19 <
   6   6  11    30.95   -32.10   129.60     19 <
   6   7  -3     6.26   -16.30   126.90     19 <
   6   7  -2    22.47    44.00   126.40     19 <
   6   7  -1     7.44   -27.20   133.80     19 <
   6   8 -14     1.53   -23.40   125.90     19 <
   6   8 -13     2.75    27.90   129.30     19 <
   6   8 -12     3.85    29.00   130.50     19 <
   6   8 -11    35.51    67.70   128.50     19 <
   6   9 -22     0.69   -14.00   124.40     19 <
   6   9 -21     2.68   -19.90   127.30     19 <
   7   6  21     1.03    -9.50   130.10     19 <
   7   7   9     8.62    25.40   133.80     19 <
   7   7  10    17.64     3.60   130.60     19 <
   7   7  11     6.61    61.50   136.10     19 <
   7   7  12    53.37   -34.00   126.70     19 <
   7   7  13     1.60   -36.10   129.20     19 <
   7   8  -2     1.73    84.90   133.70     19 <
   7   8  -1     2.59    20.20   133.60     19 <
   7   8   1     2.11    55.00   133.80     19 <
   7   9 -12     4.80    21.10   131.70     19 <
   7   9 -11     1.21    88.20   127.30     19 <
   7   9 -10     5.35   111.20   131.10     19 <
   7   9  -9    16.74   102.30   132.30     19 <
  -7  -8  12     3.76   103.30   136.70     21 <
  -7  -8  13    16.27   -38.30   138.70     21 <
  -7  -8  14     8.60    26.40   141.00     21 <
  -7  -8  15    34.30   198.10   148.10     21 <
  -7  -8  16     5.91   -25.50   142.20     21 <
  -7  -8  17     2.76   -31.50   139.00     21 <
  -7  -7  -2   152.20    11.60   142.40     21 <
  -7  -7  -1    60.24    -4.70   141.40     21 <
  -7  -7   0    51.07   -47.30   135.90     21 <
  -7  -7   1    62.15     9.00   140.10     21 <
  -7  -7   2   147.41    89.90   137.20     21 <
  -7  -6 -14    38.88    23.30   137.10     21 <
  -7  -6 -13    47.41    -5.40   112.10     21 <
  -7  -6 -12    31.70   -54.00   135.10     21 <
  -7  -6 -11    12.19   -26.40   134.50     21 <
  -7  -5 -22    34.35   -35.90   133.20     21 <
  -6  -7  12     6.25    25.50   135.70     21 <
  -6  -7  13    25.01   132.30   139.80     21 <
  -6  -7  14    16.27   -34.70   131.80     21 <
  -6  -7  15    17.58   102.90   133.90     21 <
  -6  -7  16    29.98    67.60   135.10     21 <
  -6  -6  -2   260.72    70.70   138.80     21 <
  -6  -6  -1    43.59    73.40   146.70     21 <
  -6  -6   0    31.84   124.90   134.60     21 <
  -6  -6   1    55.22   -43.30   144.20     21 <
  -6  -5 -15     9.08     1.70   126.60     21 <
  -6  -5 -14     4.59   -39.80   129.70     21 <
  -6  -5 -13    63.21    63.60   127.40     21 <
  -6  -5 -12    49.53   -15.80   131.90     21 <
  -6  -4 -25     2.85   -27.60   124.60     21 <
  -6  -4 -24     1.32   -13.00   129.00     21 <
  -6  -4 -23     1.62   -22.00   127.40     21 <
  -5  -6  12    10.31   -24.20   135.20     21 <
  -5  -6  13    92.73   218.00   134.00     21 <
  -5  -6  14    11.26    -9.10   112.10     21 <
  -5  -6  15    42.04   -36.50   133.20     21 <
  -5  -5  -2  1144.80  1328.20   163.50     21 o
  -5  -5  -1   640.95   585.30   191.80     21 o
  -5  -5   0  1546.20  2297.10   193.90     21 o
  -5  -4 -15    56.86   -24.40   125.10     21 <
  -5  -4 -14    26.61   -12.00   128.10     21 <
  -5  -4 -13     9.88   -13.70   138.90     21 <
  -5  -4 -12   341.53   250.40   140.40     21 <
  -5  -3 -26     2.03    -2.30   123.30     21 <
  -5  -3 -25     3.02    -0.90   112.10     21 <
  -5  -3 -24    18.04    -4.50   126.40     21 <
  -5  -3 -23    27.59    -6.10   112.10     21 <
  -4  -5  12    69.72    85.70   144.40     21 <
  -4  -5  13   103.51   260.20   142.10     21 <
  -4  -5  14    80.64   211.40   132.80     21 <
  -4  -5  15    66.77    75.80   149.80     21 <
  -4  -4  -2   864.58   814.60   170.10     21 o
  -4  -4  -1  1310.80  1537.20   194.50     21 o
  -4  -4   0  1659.90  1698.10   200.90     21 o
  -4  -3 -14    39.72   -18.00   129.70     21 <
  -4  -3 -13   133.29    80.90   134.30     21 <
  -4  -3 -12   162.69    -3.50   112.10     21 <
  -4  -2 -26     2.55   -12.60   123.80     21 <
  -4  -2 -25     4.75    23.90   125.20     21 <
  -4  -2 -24     3.81   -20.20   128.20     21 <
  -4  -2 -23    24.57   -32.30   125.10     21 <
  -3  -4  12   338.82   385.80   173.30     21 <
  -3  -4  13   322.48   388.10   165.60     21 <
  -3  -4  14   168.44   627.80   155.40     21 o
  -3  -4  15    21.08    15.10   162.50     21 <
  -3  -3  -1   402.88   331.10   181.20     21 <
  -3  -3   0   147.87   398.00   187.30     21 <
  -3  -2 -14   240.18   396.30   148.30     21 <
  -3  -2 -13   138.23   320.30   147.50     21 <
  -3  -1 -26     0.99    -6.60   126.50     21 <
  -3  -1 -25    11.56    46.60   125.10     21 <
  -3  -1 -24    67.32    61.40   127.80     21 <
  -3  -1 -23    11.16     7.70   128.00     21 <
  -2  -3  12   364.95   725.30   166.00     21 o
  -2  -3  13   287.49   273.40   156.60     21 <
  -2  -3  14   163.49    49.30   145.70     21 <
  -2  -3  15    92.83    19.40   156.20     21 <
  -2  -2  -1 11641.00 13437.10   640.70     21 o
  -2  -1 -14   203.19     7.40   134.60     21 <
  -2  -1 -13    71.98   113.90   134.40     21 <
  -2   0 -26     6.37    43.10   125.80     21 <
  -2   0 -25     1.85   107.10   124.00     21 <
  -2   0 -24    37.47     5.50   122.90     21 <
  -2   0 -23   111.64   -14.80   123.80     21 <
  -1  -2  13    83.76    74.70   162.90     21 <
  -1  -2  14    94.10    30.70   145.90     21 <
  -1  -2  15    90.27   138.30   153.90     21 <
  -1   0 -13    55.20   -40.40   149.20     21 <
  -1   0 -12   115.62   325.50   167.50     21 <
  -1   1 -25     9.90   -13.10   125.80     21 <
  -1   1 -24    26.71    36.60   125.10     21 <
  -1   1 -23    13.55   -32.80   124.90     21 <
   0  -1  13   556.22   603.40   145.70     21 o
   0  -1  14   235.72   150.70   164.20     21 <
   0  -1  15   502.57   660.20   158.80     21 o
   0   1 -13   478.38   119.10   150.90     21 <
   0   1 -12   143.33   -86.50   149.10     21 <
   0   2 -25    13.36     9.80   130.50     21 <
   0   2 -24     9.68     7.50   126.50     21 <
   0   2 -23   215.29    76.10   130.60     21 <
   1   0  14   230.66    32.10   159.90     21 <
   1   0  15  1306.50  1082.30   169.70     21 o
   1   0  16  1019.50   862.50   163.70     21 o
   1   2 -12   816.44   674.50   173.60     21 o
   1   2 -11   536.21   392.00   180.70     21 <
   1   3 -24    10.25   -25.50   128.10     21 <
   1   3 -23    20.20   -17.10   132.40     21 <
   1   3 -22    75.64   175.20   130.30     21 <
   2   1  15   157.05    82.40   153.20     21 <
   2   1  16  1056.50  1320.70   168.20     21 o
   2   1  17   925.15   805.30   169.80     21 o
   2   2   1 11476.00  7934.30   655.80     21 o
   2   3 -12   339.72   357.10   164.20     21 <
   2   3 -11   244.25    40.30   144.50     21 <
   2   4 -24    64.18    19.90   127.40     21 <
   2   4 -23    72.82     4.30   127.30     21 <
   2   4 -22    54.55    88.50   125.70     21 <
   2   4 -21    13.25   119.80   164.20     21 <
   3   2  15   256.21   103.70   156.50     21 <
   3   2  16   553.38   510.60   137.70     21 o
   3   2  17    77.70    -2.80   112.10     21 <
   3   2  18    42.54   136.00   134.60     21 <
   3   3   2   207.32   336.50   170.20     21 <
   3   3   3   232.37   -72.60   160.80     21 <
   3   4 -11   489.31   258.10   146.70     21 <
   3   4 -10    14.12    -7.50   142.10     21 <
   3   5 -23    19.39    33.90   129.40     21 <
   3   5 -22   215.40    84.30   128.70     21 <
   3   5 -21    23.58    -1.10   128.90     21 <
   3   6 -30     5.58    -1.10   123.70     21 <
   4   3  16   225.00    49.10   142.30     21 <
   4   3  17   116.63   142.20   143.80     21 <
   4   3  18    55.61    14.20   129.90     21 <
   4   3  19    29.93    74.10   129.70     21 <
   4   3  20    29.24    39.30   129.80     21 <
   4   4   2   844.50  1158.50   179.10     21 o
   4   4   3    96.04   -31.80   150.40     21 <
   4   4   4    66.98   116.20   132.80     21 <
   4   5 -11    90.46    26.00   140.50     21 <
   4   5 -10    77.87    52.70   137.90     21 <
   4   5  -9    44.16    88.00   139.20     21 <
   4   6 -23    44.46    57.60   130.80     21 <
   4   6 -22    12.63   -18.30   128.40     21 <
   4   6 -21     9.45   -10.80   123.50     21 <
   4   6 -20    18.07    -7.00   112.10     21 <
   5   4  17    32.22    -5.90   127.90     21 <
   5   4  18    12.01    93.30   132.70     21 <
   5   4  19    40.62   -16.90   120.30     21 <
   5   4  20    35.42    29.20   126.50     21 <
   5   4  21     3.55    27.90   126.20     21 <
   5   4  22     4.22    30.60   128.90     21 <
   5   5   3   133.67    64.30   190.40     21 <
   5   5   4  1825.20  2380.00   165.00     21 o
   5   5   5   402.83   319.00   173.50     21 <
   5   5   6     2.49    45.20   141.10     21 <
   5   6 -10   107.15    93.50   138.20     21 <
   5   6  -9    91.17    -9.10   150.20     21 <
   5   6  -8   502.79   845.40   142.80     21 o
   5   6  -7    12.48    -5.70   148.10     21 <
   5   7 -22    59.70    34.70   130.10     21 <
   5   7 -21    21.61    65.00   125.30     21 <
   5   7 -20    17.77   -34.10   126.40     21 <
   5   7 -19    37.77   147.70   129.10     21 <
   6   5  18     7.83    -9.40   122.00     21 <
   6   5  19     9.23     7.50   124.80     21 <
   6   5  20     1.94   -24.20   126.60     21 <
   6   5  21     1.87    -1.40   122.30     21 <
   6   5  22     4.24   114.30   129.30     21 <
   6   5  23     1.29    52.50   123.60     21 <
   6   5  24     1.00    -6.00   123.90     21 <
   6   6   4    11.22    98.30   126.80     21 <
   6   6   5   102.14   -23.10   131.40     21 <
   6   6   6     9.52    22.20   128.50     21 <
   6   6   7    19.82    19.60   129.40     21 <
   6   7  -9    28.45    60.40   128.70     21 <
   6   7  -8     5.53    13.10   128.20     21 <
   6   7  -7    42.12    -9.50   128.60     21 <
   6   7  -6    40.31    69.50   129.10     21 <
   6   8 -21     6.01   -21.70   125.80     21 <
   6   8 -20    21.18   -13.60   128.20     21 <
   6   8 -19     1.00    -6.60   123.90     21 <
   6   8 -18     4.56   104.20   130.10     21 <
   6   8 -17     1.59    20.00   125.90     21 <
   7   6  19     4.73   -26.50   124.60     21 <
   7   6  20     5.58   -12.00   127.00     21 <
   7   6  21     1.19   -21.80   128.60     21 <
   7   7   5    32.18    -8.00   132.70     21 <
   7   7   6    27.86     8.10   132.80     21 <
   7   7   7    18.51    81.40   132.10     21 <
   7   7   8     2.27     1.00   127.60     21 <
   7   7   9    17.19    69.10   128.30     21 <
   7   8  -8    31.22   -28.50   126.80     21 <
   7   8  -7     1.55   -29.40   130.10     21 <
   7   8  -6    36.24    23.20   129.80     21 <
   7   8  -5    87.31    57.00   130.20     21 <
   7   8  -4    23.19   -18.20   128.20     21 <
   7   9 -19     2.30    -3.80   112.10     21 <
   7   9 -18     4.62    10.20   130.00     21 <
   7   9 -17     1.38    14.70   129.20     21 <
   7   9 -16     6.33    66.30   127.70     21 <
  -7  -8  18    30.43   -39.60   145.10     22 <
  -7  -8  19     3.34    83.30   143.20     22 <
  -7  -8  20    16.40   -38.80   137.10     22 <
  -7  -7   3    78.93   -44.30   144.60     22 <
  -7  -7   4   223.89   373.50   148.50     22 <
  -7  -7   5    42.53    15.10   148.80     22 <
  -7  -7   6    76.80   124.90   144.50     22 <
  -7  -7   7    49.74   -21.30   146.90     22 <
  -7  -6 -10    13.59    -5.30   136.30     22 <
  -7  -6  -9    54.56   -47.00   133.90     22 <
  -7  -6  -8    22.57   -67.00   141.70     22 <
  -7  -6  -7    43.77   -31.90   112.10     22 <
  -7  -5 -22    89.08   -18.00   134.70     22 <
  -7  -5 -21     3.95    74.10   134.50     22 <
  -7  -5 -20     9.45   -29.60   134.80     22 <
  -7  -5 -19     4.04   155.50   139.30     22 <
  -6  -7  17    20.99   187.10   149.50     22 <
  -6  -7  18    23.67   -31.10   141.10     22 <
  -6  -7  19    14.95   -49.80   133.60     22 <
  -6  -7  20    10.34   -42.50   132.20     22 <
  -6  -7  21     1.81    73.20   134.80     22 <
  -6  -7  22     3.28   -29.50   136.00     22 <
  -6  -7  23     0.77    11.00   135.60     22 <
  -6  -6   2   445.48   220.70   138.80     22 <
  -6  -6   3    78.24   109.00   147.20     22 <
  -6  -6   4    35.55   -53.00   143.80     22 <
  -6  -6   5   151.37   261.20   140.30     22 <
  -6  -6   6    12.12   -32.00   146.40     22 <
  -6  -5 -11    27.94   172.20   139.70     22 <
  -6  -5 -10    12.10    41.10   139.70     22 <
  -6  -5  -9    34.84    -5.90   134.90     22 <
  -6  -5  -8    15.22    79.50   131.40     22 <
  -6  -4 -23     5.34    -6.80   128.90     22 <
  -6  -4 -22     6.69   -47.70   132.60     22 <
  -6  -4 -21    16.81   145.60   130.40     22 <
  -6  -4 -20    58.23    -3.70   128.70     22 <
  -5  -6  16    45.40   130.50   135.50     22 <
  -5  -6  17    70.34    68.30   128.10     22 <
  -5  -6  18    20.19   -29.50   128.10     22 <
  -5  -6  19    67.06    -8.30   131.40     22 <
  -5  -6  20    11.72    -7.20   112.10     22 <
  -5  -6  21     6.25    93.00   131.40     22 <
  -5  -5   2  1450.30  1486.90   180.90     22 o
  -5  -5   3   186.16   201.70   199.40     22 <
  -5  -5   4  2650.30  3145.20   197.60     22 o
  -5  -4 -12   295.42   462.30   139.70     22 o
  -5  -4 -11   140.55   126.40   147.40     22 <
  -5  -4 -10    10.89   119.80   130.90     22 <
  -5  -4  -9    66.98    56.20   140.40     22 <
  -5  -3 -24    15.70    56.90   134.40     22 <
  -5  -3 -23    14.34   -23.30   128.20     22 <
  -5  -3 -22   120.40    -4.40   127.10     22 <
  -5  -3 -21     7.63    31.00   126.50     22 <
  -4  -5  15   122.79   123.10   155.80     22 <
  -4  -5  16   276.32   314.20   168.10     22 <
  -4  -5  17   456.89  1082.90   161.00     22 o
  -4  -5  18    11.78    10.20   149.90     22 <
  -4  -5  19    63.60   213.80   133.80     22 <
  -4  -5  20    20.09   102.00   140.40     22 <
  -4  -4   1  2229.30  1413.80   200.40     22 o
  -4  -4   2   811.26   798.20   183.50     22 o
  -4  -4   3   287.50   128.60   164.40     22 <
  -4  -3 -12   152.08    79.10   144.70     22 <
  -4  -3 -11   112.27   189.90   135.40     22 <
  -4  -3 -10   141.07    53.50   142.90     22 <
  -4  -2 -24    19.34   -27.00   130.00     22 <
  -4  -2 -23    52.08    41.90   128.10     22 <
  -4  -2 -22    14.71   -14.70   127.10     22 <
  -4  -2 -21    34.61    63.10   126.00     22 <
  -3  -4  15    81.01   -14.40   170.70     22 <
  -3  -4  16   887.63   830.20   158.50     22 o
  -3  -4  17   104.61   152.60   172.80     22 <
  -3  -4  18   299.35   464.10   151.30     22 o
  -3  -3   1   858.76   607.50   196.20     22 o
  -3  -3   2   568.65   370.60   180.80     22 <
  -3  -2 -13   219.02    20.70   142.30     22 <
  -3  -2 -12   368.60   250.60   166.30     22 <
  -3  -2 -11  1066.10  1578.10   162.80     22 o
  -3  -1 -25    14.02    -9.10   127.10     22 <
  -3  -1 -24    66.89    -9.50   125.10     22 <
  -3  -1 -23    32.92    21.50   132.20     22 <
  -3  -1 -22    63.78   -15.20   129.00     22 <
  -2  -3  14    70.33   132.40   150.10     22 <
  -2  -3  15   165.22    41.20   153.90     22 <
  -2  -3  16  1146.10   568.80   169.10     22 o
  -2  -3  17   742.40   804.90   164.80     22 o
  -2  -2   1 15113.00 18096.00   617.60     22 o
  -2  -1 -13    59.16    19.80   145.30     22 <
  -2  -1 -12   125.56    52.70   151.80     22 <
  -2   0 -25    14.37    29.50   132.00     22 <
  -2   0 -24    49.65    -5.60   112.10     22 <
  -2   0 -23    93.22    64.00   137.80     22 <
  -1  -2  14   301.81   169.00   138.20     22 <
  -1  -2  15   170.95   155.30   158.70     22 <
  -1  -2  16   653.17   393.70   148.10     22 <
  -1  -1   0  1065.60   916.90   487.90     22 <
  -1   0 -13   152.50   -19.20   156.90     22 <
  -1   0 -12   192.64   531.60   168.40     22 o
  -1   1 -25    12.93   -20.20   129.90     22 <
  -1   1 -24    13.96   -35.00   130.40     22 <
  -1   1 -23     6.72   -40.40   135.20     22 <
   0  -1  14   202.24   255.70   168.40     22 <
   0  -1  15   777.61   987.10   174.00     22 o
   0  -1  16  1100.10   577.40   166.90     22 o
   0   1 -13   826.97   760.30   160.30     22 o
   0   1 -12   124.81    65.70   160.10     22 <
   0   2 -26    60.08    80.40   132.50     22 <
   0   2 -25    24.35     7.70   132.30     22 <
   0   2 -24     4.43   129.70   140.40     22 <
   0   2 -23   369.81   562.70   146.10     22 o
   1   0  14   421.32   313.80   165.70     22 <
   1   0  15  1306.90  1230.40   183.30     22 o
   1   0  16  1073.90  1080.60   173.70     22 o
   1   1   0  1422.80  1381.30   504.90     22 <
   1   2 -14   264.80    79.70   146.00     22 <
   1   2 -13   134.70    -8.80   167.10     22 <
   1   2 -12  1467.10  2428.90   170.80     22 o
   1   3 -26     6.00    90.80   128.30     22 <
   1   3 -25     5.90    56.30   134.80     22 <
   1   3 -24    10.77    42.10   130.90     22 <
   1   3 -23    51.96    35.10   136.30     22 <
   2   1  13   185.89   -40.20   140.60     22 <
   2   1  14   328.09   133.50   135.40     22 <
   2   1  15   105.43   -14.90   153.40     22 <
   2   1  16  1445.30   880.80   164.60     22 o
   2   2   0 53189.00 52835.60   625.30     22 o
   2   3 -14    73.70    41.50   151.00     22 <
   2   3 -13   284.35   467.70   163.60     22 <
   2   3 -12   741.25   729.60   160.10     22 o
   2   4 -26     4.99   -12.30   126.20     22 <
   2   4 -25     6.57    32.80   133.30     22 <
   2   4 -24   113.20   -18.30   127.60     22 <
   2   4 -23    28.59   -29.60   130.50     22 <
   3   2  13   210.21   -14.00   150.10     22 <
   3   2  14   440.98   575.70   142.40     22 o
   3   2  15   175.20   100.20   157.70     22 <
   3   2  16   682.66   368.20   138.70     22 <
   3   3  -1   736.41   877.20   178.70     22 o
   3   3   0   246.27   123.80   181.90     22 <
   3   4 -14   204.50   445.90   154.50     22 <
   3   4 -13   285.22   443.60   160.90     22 <
   3   4 -12   412.63   231.60   172.60     22 <
   3   5 -26     3.98   -31.90   127.20     22 <
   3   5 -25    10.02    -3.10   124.10     22 <
   3   5 -24    13.77   -33.00   124.20     22 <
   3   5 -23    25.39     1.60   122.20     22 <
   4   3  13   319.99   -19.50   129.30     22 <
   4   3  14    63.63    75.20   133.70     22 <
   4   3  15    68.04    97.70   146.70     22 <
   4   3  16   226.24   201.10   137.10     22 <
   4   3  17   196.39    24.50   141.10     22 <
   4   4  -1  2308.70  2918.10   202.40     22 o
   4   4   0  1160.00   939.90   199.60     22 o
   4   4   1  2233.80  1318.40   187.90     22 o
   4   5 -14   209.57   152.40   145.90     22 <
   4   5 -13   196.39   252.60   138.00     22 <
   4   5 -12   136.77   114.10   140.60     22 <
   4   6 -26     9.19    53.50   129.80     22 <
   4   6 -25    29.85    29.30   130.10     22 <
   4   6 -24     9.78   -11.70   127.40     22 <
   4   6 -23    87.92    17.70   123.30     22 <
   4   6 -22    24.92   -14.00   121.20     22 <
   5   4  13    69.47    34.80   127.60     22 <
   5   4  14    40.52   -14.60   126.50     22 <
   5   4  15    49.28     0.50   112.10     22 <
   5   4  16   172.03   -32.70   127.90     22 <
   5   4  17   127.41   -35.50   129.10     22 <
   5   4  18    33.07   -43.90   130.00     22 <
   5   5  -1   875.17  1538.80   206.20     22 o
   5   5   0  2040.30  2362.40   196.30     22 o
   5   5   1   764.69   861.00   196.70     22 o
   5   5   2  1302.20  1232.40   169.60     22 o
   5   6 -14   140.85    36.70   134.00     22 <
   5   6 -13   143.07   -15.30   129.10     22 <
   5   6 -12    98.45   -18.30   134.50     22 <
   5   6 -11   167.07    92.30   134.30     22 <
   5   7 -25    11.64    89.60   126.90     22 <
   5   7 -24     5.12     4.50   131.40     22 <
   5   7 -23    70.77     2.60   131.20     22 <
   5   7 -22    52.09    62.00   128.60     22 <
   6   5  14    22.49    20.90   126.50     22 <
   6   5  15    74.23    18.00   126.40     22 <
   6   5  16    86.71    11.90   129.90     22 <
   6   5  17    42.13   -19.20   128.90     22 <
   6   5  18    17.15     9.10   127.60     22 <
   6   5  19    19.08   -39.20   128.20     22 <
   6   6   0    49.29    91.80   135.40     22 <
   6   6   1    85.69   -15.90   141.00     22 <
   6   6   2   319.44   230.50   136.40     22 <
   6   6   3    87.39   -26.20   138.00     22 <
   6   7 -13    43.60   -44.80   131.40     22 <
   6   7 -12    34.39    64.00   126.90     22 <
   6   7 -11     6.77    12.00   134.30     22 <
   6   7 -10    17.51   174.20   132.00     22 <
   6   8 -23    11.84    30.30   125.90     22 <
   6   8 -22     7.40    49.70   126.40     22 <
   6   8 -21    12.77    -5.90   129.40     22 <
   7   6  14    28.49   175.60   139.10     22 <
   7   6  15    44.76    -3.20   112.10     22 <
   7   6  16    13.64   -16.20   139.20     22 <
   7   6  17     9.26   169.40   139.90     22 <
   7   6  18    38.40    66.00   139.50     22 <
   7   6  19    10.19    29.40   134.10     22 <
   7   6  20     8.73   -14.70   138.20     22 <
   7   7   0   119.43    35.20   135.30     22 <
   7   7   1   102.85   -22.90   137.30     22 <
   7   7   2   289.05   -33.80   136.70     22 <
   7   7   3    80.84     0.20   124.50     22 <
   7   7   4   261.27   410.60   140.30     22 <
   7   8 -13     7.38    10.60   134.30     22 <
   7   8 -12    19.00   -41.00   132.90     22 <
   7   8 -11    17.50     6.30   139.40     22 <
   7   8 -10    36.20   -57.20   133.30     22 <
   7   8  -9    22.82   -30.00   125.60     22 <
  -7  -7   9    12.27    89.20   141.50     23 <
  -7  -7  10    33.69    42.60   144.00     23 <
  -7  -7  11     2.58   -38.30   143.20     23 <
  -7  -7  12    60.38   125.90   142.70     23 <
  -7  -7  13     2.49    -5.20   141.70     23 <
  -7  -7  14     5.37   -17.80   136.60     23 <
  -7  -7  15     2.33   134.20   138.80     23 <
  -7  -7  16     8.08   106.20   136.10     23 <
  -7  -6  -9    22.39   183.00   139.50     23 <
  -7  -6  -8     8.23   163.10   140.30     23 <
  -7  -6  -7    24.25    -2.10   137.60     23 <
  -7  -6  -6     5.16   -20.80   136.40     23 <
  -7  -6  -5    45.70    71.30   137.80     23 <
  -7  -6  -4    20.43   160.60   142.40     23 <
  -7  -5 -22    44.81   -19.80   134.90     23 <
  -7  -5 -21     4.93   131.40   139.50     23 <
  -7  -5 -20     2.37    16.30   134.40     23 <
  -7  -5 -19     0.65    15.30   139.60     23 <
  -6  -6   7    16.96   -41.50   129.00     23 <
  -6  -6   8    10.58    50.70   130.90     23 <
  -6  -6   9     4.19   -34.30   136.10     23 <
  -6  -6  10     3.06   -36.10   130.40     23 <
  -6  -6  11    15.93   -31.80   129.90     23 <
  -6  -6  12    13.76    44.70   130.50     23 <
  -6  -6  13     7.54   -27.60   133.10     23 <
  -6  -5 -10     5.25     9.80   134.90     23 <
  -6  -5  -9    23.00    14.80   132.90     23 <
  -6  -5  -8    20.65    50.90   127.10     23 <
  -6  -5  -7    14.82   -29.90   131.70     23 <
  -6  -5  -6     8.05   -30.70   128.30     23 <
  -6  -4 -25     2.79     1.40   126.50     23 <
  -6  -4 -24     0.41    -3.70   125.60     23 <
  -6  -4 -23     1.13    -7.90   132.10     23 <
  -6  -4 -22     2.41   -31.90   130.00     23 <
  -6  -4 -21     4.69     0.20   112.10     23 <
  -5  -5   6     6.43    12.90   150.50     23 <
  -5  -5   7    65.61    87.10   132.20     23 <
  -5  -5   8    43.51   132.50   146.40     23 <
  -5  -5   9    15.53   116.80   135.20     23 <
  -5  -5  10     1.85    10.50   163.60     23 <
  -5  -4 -12   216.43    15.70   134.70     23 <
  -5  -4 -11   101.59    -0.80   112.10     23 <
  -5  -4 -10    10.23   -39.30   130.60     23 <
  -5  -4  -9    35.04   -18.40   130.20     23 <
  -5  -4  -8     5.42    42.00   127.20     23 <
  -5  -3 -27     6.65     2.20   123.70     23 <
  -5  -3 -26     2.20    20.30   127.40     23 <
  -5  -3 -25     0.94   -20.00   126.70     23 <
  -5  -3 -24    11.72    -4.40   112.10     23 <
  -5  -3 -23    17.26   -19.60   128.50     23 <
  -5  -3 -22    93.84    11.40   128.00     23 <
  -4  -5  24     3.86    30.50   125.50     23 <
  -4  -4   4    43.86    11.50   133.70     23 <
  -4  -4   5    13.27   126.20   134.30     23 <
  -4  -4   6    31.03   -37.50   134.20     23 <
  -4  -4   7    20.54   152.20   133.10     23 <
  -4  -3 -13   159.00    -7.80   131.20     23 <
  -4  -3 -12   171.77   454.90   141.40     23 o
  -4  -3 -11     4.21    -7.80   141.70     23 <
  -4  -3 -10    45.99   -53.20   136.20     23 <
  -4  -2 -28     3.33    46.40   124.60     23 <
  -4  -2 -27     1.20    -7.20   121.30     23 <
  -4  -2 -26     1.26    34.30   125.40     23 <
  -4  -2 -25     3.04   -15.00   123.90     23 <
  -4  -2 -24     5.17    -1.90   112.10     23 <
  -3  -4  22    11.90     9.80   129.70     23 <
  -3  -4  23    14.72   -22.20   129.20     23 <
  -3  -4  24     9.24    35.00   129.70     23 <
  -3  -3   3   307.62   124.00   168.20     23 <
  -3  -3   4    85.18   123.20   163.60     23 <
  -3  -3   5   232.52   -23.20   164.30     23 <
  -3  -2 -14   277.55   309.60   143.50     23 <
  -3  -2 -13   143.91   132.30   149.50     23 <
  -3  -2 -12   143.46   139.70   160.00     23 <
  -3  -1 -29     1.65     5.40   125.30     23 <
  -3  -1 -28     1.13   -12.20   123.40     23 <
  -3  -1 -27     2.30    34.20   128.90     23 <
  -3  -1 -26     1.39     9.00   122.90     23 <
  -3  -1 -25    17.83    -1.20   112.10     23 <
  -2  -3  20    28.45    -1.80   128.80     23 <
  -2  -3  21    16.31   -19.30   129.50     23 <
  -2  -3  22     8.19   118.30   129.60     23 <
  -2  -3  23    22.38   -14.30   129.60     23 <
  -2  -3  24    10.17    63.60   125.50     23 <
  -2  -2   2  1788.60  1713.80   350.20     23 o
  -2  -2   3  2828.10  3889.30   278.90     23 o
  -2  -1 -15    17.57    75.30   153.00     23 <
  -2  -1 -14   147.66   108.30   130.90     23 <
  -2  -1 -13    64.87    46.30   140.20     23 <
  -2   0 -30    12.25   -23.20   120.20     23 <
  -2   0 -29     0.93    -4.50   112.10     23 <
  -2   0 -28     2.66    -9.60   121.80     23 <
  -2   0 -27     0.70    -7.40   112.10     23 <
  -2   0 -26     3.64   -31.60   127.50     23 <
  -1  -2  19    25.03    62.00   138.10     23 <
  -1  -2  20    26.19    75.10   127.30     23 <
  -1  -2  21     3.34     0.80   128.80     23 <
  -1  -2  22     2.72   -17.40   126.50     23 <
  -1  -2  23     7.82   -27.60   127.00     23 <
  -1  -2  24     1.67     4.90   126.30     23 <
  -1  -1   1 36678.00 36262.60   422.20     23 o
  -1   0 -16  1064.00  1148.30   164.60     23 o
  -1   0 -15  1008.40   809.80   164.70     23 o
  -1   0 -14   174.73    80.10   158.80     23 <
  -1   1 -31     1.20   -32.30   121.00     23 <
  -1   1 -30     0.61     3.40   122.20     23 <
  -1   1 -29     2.18    -2.20   112.10     23 <
  -1   1 -28     2.00    75.10   123.90     23 <
  -1   1 -27     4.55     0.60   112.10     23 <
   0  -1  18    25.70    43.10   139.90     23 <
   0  -1  19    16.85   -25.40   129.60     23 <
   0  -1  20    57.73    -6.10   123.90     23 <
   0  -1  21   184.61   137.70   135.90     23 <
   0  -1  22    20.78    -9.80   131.10     23 <
   0  -1  23     3.60    -2.10   123.80     23 <
   0   1 -17   127.95     7.90   145.70     23 <
   0   1 -16   579.10   797.40   158.70     23 o
   0   1 -15   476.69   733.50   165.30     23 o
   0   2 -31     1.70    -0.10   112.10     23 <
   0   2 -30     2.17    51.60   123.20     23 <
   0   2 -29     7.84    84.30   127.50     23 <
   0   2 -28    42.22   -12.50   124.20     23 <
   1   0  17    33.14    -0.50   112.10     23 <
   1   0  18   529.89   747.30   142.90     23 o
   1   0  19    43.07   -13.10   141.40     23 <
   1   0  20    56.07   -37.40   127.40     23 <
   1   0  21     6.65   -27.00   124.30     23 <
   1   0  22     9.30    21.40   131.80     23 <
   1   1  -1 36496.00 33662.70   428.50     23 o
   1   2 -18   152.46   101.20   130.80     23 <
   1   2 -17    35.24    -1.50   112.10     23 <
   1   2 -16   346.10   823.90   150.70     23 o
   1   3 -30     2.20    12.50   127.30     23 <
   1   3 -29     1.94    -8.70   127.00     23 <
   1   3 -28     1.56    -2.30   112.10     23 <
   2   1  16  1010.60  1709.70   171.70     23 o
   2   1  17   724.49  1291.20   169.50     23 o
   2   1  18    30.10   167.40   165.80     23 <
   2   1  19   119.28   772.30   142.40     23 o
   2   1  20    59.65    48.90   142.40     23 <
   2   1  21    65.83   -25.20   128.50     23 <
   2   2  -2  1856.90  1844.10   338.40     23 o
   2   2  -1 10171.00  9997.20   593.50     23 o
   2   3 -19    30.53   -13.50   124.00     23 <
   2   3 -18    11.45   -33.20   145.50     23 <
   2   3 -17   440.46   771.80   162.30     23 o
   2   3 -16   775.18  1141.70   165.60     23 o
   2   4 -30     2.04    23.00   123.90     23 <
   2   4 -29     2.61    62.40   127.70     23 <
   2   4 -28    21.16    56.50   125.30     23 <
   3   2  15   220.04    88.70   157.10     23 <
   3   2  16   466.22   819.00   140.40     23 o
   3   2  17    22.92    63.30   146.10     23 <
   3   2  18   115.23    92.80   126.70     23 <
   3   2  19   122.54   -11.80   127.50     23 <
   3   2  20    90.66    70.50   136.30     23 <
   3   3  -3   296.36    80.10   166.10     23 <
   3   3  -2   243.19   181.40   173.40     23 <
   3   3  -1   611.38   323.80   179.90     23 <
   3   4 -19    65.36    -9.90   112.10     23 <
   3   4 -18   260.17   540.00   138.20     23 o
   3   4 -17    58.36    72.80   159.10     23 <
   3   4 -16   610.30   591.20   139.00     23 o
   3   5 -30     2.31    86.10   124.50     23 <
   3   5 -29     4.30    22.40   130.40     23 <
   4   3  14    12.42   -16.00   128.40     23 <
   4   3  15    15.87   108.40   140.40     23 <
   4   3  16   147.35   221.50   131.30     23 <
   4   3  17    54.96   -29.70   137.80     23 <
   4   3  18    76.55    25.90   131.80     23 <
   4   3  19    35.62    12.70   126.30     23 <
   4   3  20     9.60    27.40   125.80     23 <
   4   4  -4    50.90    56.50   142.20     23 <
   4   4  -3    86.49    26.10   153.50     23 <
   4   4  -2   767.79   848.70   174.20     23 o
   4   4  -1  1229.10  1085.20   185.40     23 o
   4   5 -20     6.21    -6.70   126.20     23 <
   4   5 -19    17.63     4.80   128.00     23 <
   4   5 -18    21.88   -33.20   142.00     23 <
   4   5 -17   324.68   753.80   148.60     23 o
   4   5 -16   288.19   316.50   152.30     23 <
   4   6 -29     1.28   -19.10   122.20     23 <
   5   4  14    36.84    81.50   135.10     23 <
   5   4  15    44.96   -29.30   132.10     23 <
   5   4  16    40.54    58.20   128.20     23 <
   5   4  17     6.97    38.50   128.00     23 <
   5   4  18    15.98    20.70   127.10     23 <
   5   4  19    27.33    37.80   131.20     23 <
   5   4  20    66.61    -1.60   112.10     23 <
   5   5  -4  1697.20  2922.40   189.80     23 o
   5   5  -3    83.26    46.70   200.20     23 <
   5   5  -2   963.54  1756.20   166.30     23 o
   5   5  -1   560.10   539.10   188.80     23 <
   5   6 -20     6.23    41.70   128.70     23 <
   5   6 -19    12.49   -21.50   123.10     23 <
   5   6 -18     8.12    16.50   128.00     23 <
   5   6 -17    24.75     9.50   128.20     23 <
   5   6 -16    47.00   -23.90   130.10     23 <
   6   5  13    66.19   -19.80   132.30     23 <
   6   5  14     3.84    14.50   122.40     23 <
   6   5  15     9.83   115.00   127.50     23 <
   6   5  16    36.33    96.10   136.50     23 <
   6   5  17    16.81    -5.60   122.90     23 <
   6   5  18    31.14   -19.50   130.00     23 <
   6   5  19    10.25    -1.00   123.90     23 <
   6   5  20     3.80   -20.80   124.90     23 <
   6   6  -5    93.37   368.40   132.20     23 <
   6   6  -4     8.21    89.80   134.90     23 <
   6   6  -3    27.69    46.40   133.50     23 <
   6   6  -2   165.88   262.30   136.50     23 <
   6   6  -1    50.96    46.70   136.50     23 <
   6   7 -20     6.12    19.60   124.10     23 <
   6   7 -19     3.40    -6.20   112.10     23 <
   6   7 -18    10.48   -19.70   124.60     23 <
   6   7 -17    19.45    81.90   126.30     23 <
   6   7 -16    21.83   -32.80   124.40     23 <
   7   6  13    43.78    -5.00   112.10     23 <
   7   6  14    35.46    13.90   133.70     23 <
   7   6  15    15.80    82.00   126.90     23 <
   7   6  16    10.70    51.90   132.70     23 <
   7   6  17     8.51   -11.80   128.80     23 <
   7   6  18    13.71    32.20   129.10     23 <
   7   6  19     8.36   -31.30   126.50     23 <
   7   6  20    12.21    33.00   131.10     23 <
   7   6  21     2.75    56.80   127.40     23 <
   7   7  -5    51.28    98.00   139.90     23 <
   7   7  -4   226.17   280.40   137.90     23 <
   7   7  -3    18.14    74.80   140.80     23 <
   7   7  -2    59.81    -0.50   129.10     23 <
   7   7  -1    60.01    98.00   133.10     23 <
   7   7   0    53.56     0.80   133.10     23 <
   7   8 -20     1.74    -1.10   130.90     23 <
   7   8 -19     0.48    78.50   132.30     23 <
   7   8 -18     7.80    43.90   130.60     23 <
   7   8 -17     3.92    59.60   128.90     23 <
   7   8 -16     1.15   -21.70   129.70     23 <
   7   8 -15    37.83   -21.10   126.80     23 <
  -7  -6  -1    10.57    39.40   143.30     25 <
  -7  -6   1    10.18    41.50   139.10     25 <
  -7  -6   2     0.77   -48.20   140.40     25 <
  -7  -6   3    34.31   -49.40   138.30     25 <
  -7  -6   4    22.27   204.90   146.50     25 <
  -7  -6   5    57.35   -11.90   148.50     25 <
  -7  -6   6     3.91    -3.70   142.40     25 <
  -7  -6   7    44.97    29.70   140.80     25 <
  -7  -5 -22    55.20   145.20   140.80     25 <
  -7  -5 -21     4.31     3.80   140.50     25 <
  -7  -5 -20     2.40   -54.00   139.90     25 <
  -7  -5 -19     0.41   -31.70   136.70     25 <
  -7  -5 -18     2.20     5.50   145.90     25 <
  -7  -5 -17    21.40    80.70   146.00     25 <
  -6  -5  -6     9.28   -21.20   135.10     25 <
  -6  -5  -5     9.37    14.30   140.80     25 <
  -6  -5  -4   105.86    31.10   146.40     25 <
  -6  -5  -3    38.34   141.60   135.60     25 <
  -6  -5  -2    40.56   243.90   143.50     25 <
  -6  -5  -1     7.50   -33.10   141.00     25 <
  -6  -5   1     6.31    13.20   136.00     25 <
  -6  -4 -25     3.02    -6.70   127.40     25 <
  -6  -4 -24     0.33    38.70   131.40     25 <
  -6  -4 -23     0.54     9.90   132.20     25 <
  -6  -4 -22     2.52   -17.10   128.80     25 <
  -6  -4 -21     1.06   -20.20   112.10     25 <
  -5  -5  19     7.75   147.10   132.70     25 <
  -5  -5  20     3.52    15.90   129.10     25 <
  -5  -5  21    37.54    24.80   133.20     25 <
  -5  -5  22   164.49   265.20   138.80     25 <
  -5  -5  23     5.82   -11.90   135.80     25 <
  -5  -5  24    34.03    62.50   132.00     25 <
  -5  -4  -9    28.20   -33.90   131.70     25 <
  -5  -4  -8     5.00   154.20   139.40     25 <
  -5  -4  -7     3.81    27.20   149.10     25 <
  -5  -4  -6   341.20   600.40   146.30     25 o
  -5  -4  -5     6.94   -12.90   156.40     25 <
  -5  -4  -4   159.42   534.30   143.40     25 o
  -5  -3 -28     0.67    15.10   134.90     25 <
  -5  -3 -27     4.38     9.70   127.90     25 <
  -5  -3 -26     1.73   137.90   127.20     25 <
  -5  -3 -25     1.67     3.30   126.30     25 <
  -5  -3 -24    16.81    51.90   136.40     25 <
  -4  -4  14     1.79     1.30   132.90     25 <
  -4  -4  15    52.49   -22.80   134.30     25 <
  -4  -4  16     2.16    65.90   129.70     25 <
  -4  -4  17     0.89   -30.60   134.70     25 <
  -4  -4  18     5.26    -0.90   112.10     25 <
  -4  -4  19     2.85   -26.00   133.70     25 <
  -4  -4  20    14.70    52.10   132.70     25 <
  -4  -4  21     9.00   -18.20   126.90     25 <
  -4  -4  22     2.11   -53.10   127.90     25 <
  -4  -4  23    17.86   -43.00   128.60     25 <
  -4  -4  24     0.47    16.90   130.00     25 <
  -4  -3 -13   176.49   131.80   146.20     25 <
  -4  -3 -12   132.47   213.00   151.20     25 <
  -4  -3 -11     2.64   -17.80   127.50     25 <
  -4  -3 -10    40.87   -16.80   131.30     25 <
  -4  -3  -9     1.85    44.00   145.00     25 <
  -4  -2 -30     0.40    13.80   129.40     25 <
  -4  -2 -29     0.88    11.30   129.60     25 <
  -4  -2 -28     1.96    53.10   127.40     25 <
  -4  -2 -27     0.05    16.70   128.00     25 <
  -3  -3  10    98.66    49.70   148.00     25 <
  -3  -3  11    39.69   334.60   147.10     25 <
  -3  -3  12     4.37   -21.00   150.30     25 <
  -3  -3  13    15.82    56.10   142.20     25 <
  -3  -3  14   157.16   256.90   145.20     25 <
  -3  -3  15    15.49     4.30   142.70     25 <
  -3  -3  16    33.70     3.30   128.90     25 <
  -3  -3  17     4.70    94.80   135.30     25 <
  -3  -2 -16   579.04   894.00   146.20     25 o
  -3  -2 -15   168.08     9.10   154.80     25 <
  -3  -2 -14   324.48   206.90   144.00     25 <
  -3  -2 -13   163.72    87.30   154.30     25 <
  -3  -2 -12   249.72   432.20   166.20     25 <
  -3  -1 -31     6.03   -14.60   124.30     25 <
  -3  -1 -30     2.01    24.00   128.50     25 <
  -3  -1 -29     1.93   -20.00   125.90     25 <
  -2  -2   6  2637.50  3022.10   282.70     25 o
  -2  -2   7    12.78    -8.50   219.80     25 <
  -2  -2   8  1680.40  1504.60   179.60     25 o
  -2  -2   9    72.15    10.90   179.20     25 <
  -2  -2  10   367.55    95.90   163.20     25 <
  -2  -1 -19   214.47   295.40   137.90     25 <
  -2  -1 -18    48.48    32.90   157.50     25 <
  -2  -1 -17   997.73   924.60   164.40     25 o
  -2  -1 -16  1069.20   962.90   168.80     25 o
  -2  -1 -15     5.59    86.10   156.60     25 <
  -1  -1   3  1836.40  2141.70   318.60     25 o
  -1  -1   4  2067.90  1884.40   345.20     25 o
  -1   0 -22    13.50    30.40   136.00     25 <
  -1   0 -21     1.72    90.30   135.00     25 <
  -1   0 -20    60.66   -37.70   131.60     25 <
  -1   0 -19    36.27   -26.70   148.60     25 <
  -1   0 -18   807.84  1248.40   149.70     25 o
   0   1 -24    22.64    66.80   133.20     25 <
   0   1 -23     2.13    47.60   130.20     25 <
   0   1 -22    23.09    -5.90   138.70     25 <
   0   1 -21   257.70   167.30   145.40     25 <
   0   1 -20   111.51   212.10   145.10     25 <
   1   1  -3  1876.30  2292.20   321.10     25 o
   1   2 -27     2.27    55.20   129.80     25 <
   1   2 -26     1.39    34.70   126.10     25 <
   1   2 -25    11.21     3.30   131.80     25 <
   1   2 -24     1.00    45.20   132.70     25 <
   1   2 -23    13.68   108.10   132.50     25 <
   1   2 -22     5.71    90.70   134.60     25 <
   2   1  22    37.18    -3.50   131.20     25 <
   2   1  23     6.28    54.50   129.80     25 <
   2   1  24    24.09   -36.40   129.40     25 <
   2   1  25     2.40   -20.90   123.00     25 <
   2   2  -7    17.15   146.40   237.90     25 <
   2   2  -6  2601.70  3364.20   282.30     25 o
   2   2  -5  9211.80  8260.10   302.00     25 o
   2   3 -29     0.20   -16.20   126.00     25 <
   2   3 -28    11.11    70.90   128.80     25 <
   2   3 -27    21.48   -31.20   124.20     25 <
   2   3 -26    35.01    28.50   125.80     25 <
   2   3 -25     0.65   -21.00   127.10     25 <
   2   3 -24     9.30   -24.10   126.50     25 <
   3   2  18     6.27    -7.80   134.00     25 <
   3   2  19   151.95   126.10   139.30     25 <
   3   2  20   120.74   126.00   131.80     25 <
   3   2  21    33.69    18.80   134.90     25 <
   3   2  22    20.98   -42.00   123.80     25 <
   3   2  23     4.07   108.90   131.90     25 <
   3   2  24     0.56    -0.90   127.80     25 <
   3   2  25    12.26    11.50   126.90     25 <
   3   3 -10   107.84    30.70   141.70     25 <
   3   3  -9   277.16    18.70   148.00     25 <
   3   3  -8   127.49    70.00   148.00     25 <
   3   3  -7   140.68   189.50   162.90     25 <
   3   4 -30     1.35    55.30   123.70     25 <
   3   4 -29    10.71    43.50   130.00     25 <
   3   4 -28     0.38   -15.50   130.20     25 <
   3   4 -27     4.43    34.30   129.40     25 <
   3   4 -26     6.34    -6.80   124.90     25 <
   3   4 -25     0.73    58.00   122.50     25 <
   4   3  15    29.10    44.20   150.30     25 <
   4   3  16   260.59   367.20   143.80     25 <
   4   3  17     5.14    41.20   148.10     25 <
   4   3  18    70.92    28.10   141.40     25 <
   4   3  19    24.20    75.10   134.50     25 <
   4   3  20     8.94    89.20   133.80     25 <
   4   3  21    18.88   -28.90   132.20     25 <
   4   3  22     9.27    77.00   133.40     25 <
   4   3  23     3.52    12.70   132.90     25 <
   4   3  24     3.35    30.50   130.20     25 <
   4   3  25     0.46    44.40   129.10     25 <
   4   4 -12    92.01   202.40   134.20     25 <
   4   4 -11    40.71     7.80   144.60     25 <
   4   4 -10   157.23   113.50   131.80     25 <
   4   4  -9    10.42     7.90   139.90     25 <
   4   4  -8     4.90   -18.60   141.50     25 <
   4   5 -29     1.86     0.80   112.10     25 <
   4   5 -28     2.97    52.10   130.20     25 <
   4   5 -27     0.45    -6.70   112.10     25 <
   4   5 -26     4.07   -22.30   127.50     25 <
   5   4  12   348.34   387.20   142.40     25 <
   5   4  13     8.42    25.10   142.20     25 <
   5   4  14     2.95     3.40   138.10     25 <
   5   4  15    27.31   -29.70   138.90     25 <
   5   4  16    66.23     6.30   133.00     25 <
   5   4  17     2.23   105.50   140.60     25 <
   5   4  18     9.58    -2.60   112.10     25 <
   5   4  19    39.26   -24.40   124.30     25 <
   5   4  20    44.18   116.30   131.90     25 <
   5   4  21     0.27    25.20   131.10     25 <
   5   4  22     5.73    72.10   125.90     25 <
   5   4  23     0.36    19.30   131.30     25 <
   5   4  24     1.17   -10.40   112.10     25 <
   5   5 -14    39.13    95.20   134.90     25 <
   5   5 -13   151.14    45.80   133.30     25 <
   5   5 -12   323.90   117.10   155.60     25 <
   5   5 -11   684.77  1031.60   143.10     25 o
   5   5 -10     1.70    13.10   145.30     25 <
   5   5  -9    18.37    19.90   137.20     25 <
   5   6 -27     8.57   -20.50   125.70     25 <
   6   5   9    19.36   -31.00   129.60     25 <
   6   5  10     1.93   100.80   131.30     25 <
   6   5  11     6.70     7.50   131.10     25 <
   6   5  12    50.52   100.00   130.90     25 <
   6   5  13    68.27    11.70   134.90     25 <
   6   5  14     0.34    47.90   124.80     25 <
   6   5  15     6.55   -26.60   129.10     25 <
   6   5  16    40.51     3.10   123.60     25 <
   6   5  17    17.68   -35.10   122.90     25 <
   6   5  18     7.98   -25.90   124.50     25 <
   6   5  19     6.39   -16.40   125.60     25 <
   6   5  20     0.87   -10.50   124.70     25 <
   6   5  21     0.24   114.50   128.80     25 <
   6   6 -16     3.06    30.70   132.00     25 <
   6   6 -15    37.81   -19.40   131.60     25 <
   6   6 -14    11.36   127.30   132.80     25 <
   6   6 -13     5.23    24.80   133.30     25 <
   6   6 -12     4.82    -7.80   130.10     25 <
   6   6 -11    17.98   110.00   127.40     25 <
   6   6 -10     7.34    -6.30   128.50     25 <
   7   6   6     2.91    -0.10   131.80     25 <
   7   6   7    38.40     0.30   112.10     25 <
   7   6   8    11.23   -10.80   130.40     25 <
   7   6   9    23.20   -24.20   133.70     25 <
   7   6  10     0.56   -28.70   129.80     25 <
   7   6  11     0.15   -46.00   126.60     25 <
   7   6  12    24.10     4.90   137.80     25 <
   7   6  13    40.84    32.90   132.50     25 <
   7   6  14    35.78   -29.90   130.10     25 <
   7   6  15    23.62   -26.80   132.40     25 <
   7   6  16     7.12   130.80   135.20     25 <
   7   6  17     7.83     4.80   130.40     25 <
   7   6  18    15.88   -36.20   126.10     25 <
   7   6  19     5.27   -26.60   130.80     25 <
   7   7 -18     2.48     1.90   130.70     25 <
   7   7 -17     0.21   -16.90   129.60     25 <
   7   7 -16     4.17    70.50   132.00     25 <
   7   7 -15     1.12    11.80   127.30     25 <
   7   7 -14     4.74     6.20   131.10     25 <
   7   7 -13     3.47    85.90   131.40     25 <
   7   7 -12    76.44    83.40   131.00     25 <
   7   7 -11     4.00    71.80   136.30     25 <
   8   7   4    11.14    96.70   140.90     25 <
   8   7   5     1.63   -16.30   132.20     25 <
   8   7   6    12.44    45.90   131.90     25 <
   8   7   7     0.76    -7.70   112.10     25 <
   8   7   8     1.36   -69.80   134.40     25 <
   8   7   9    10.17    -1.60   128.10     25 <
   8   7  10     0.84   -34.20   131.50     25 <
   8   7  11     0.42   -57.20   132.80     25 <
   8   8 -15     0.36    55.20   140.00     25 <
   8   8 -14     0.17   123.70   137.10     25 <
   8   8 -13     1.14   -10.70   137.20     25 <
   8   8 -12     0.29   -33.80   132.30     25 <
   8   8 -11     7.75   162.20   141.10     25 <
  -7  -6  -4    26.56   122.90   143.30     26 <
  -7  -6  -3    34.12    29.60   138.60     26 <
  -7  -6  -2     0.17    -6.90   141.10     26 <
  -7  -6  -1     9.97   139.20   146.80     26 <
  -7  -6   1     9.35   -39.10   137.00     26 <
  -7  -6   2     0.25     9.70   141.70     26 <
  -7  -6   3    33.40    -4.20   112.10     26 <
  -7  -6   4    22.05    28.10   144.20     26 <
  -7  -6   5    57.65    99.30   141.40     26 <
  -7  -6   6     2.97    12.80   141.70     26 <
  -7  -6   7    41.99   -47.00   141.50     26 <
  -7  -6   8    12.20    66.40   137.30     26 <
  -7  -6   9    25.98    78.30   136.20     26 <
  -7  -6  10     0.58   -47.60   144.40     26 <
  -7  -6  11     0.21    76.80   141.50     26 <
  -6  -5 -10     2.08   -26.80   130.20     26 <
  -6  -5  -9    21.77    -6.60   112.10     26 <
  -6  -5  -8    24.40    49.50   141.80     26 <
  -6  -5  -7     7.83   -17.00   137.40     26 <
  -6  -5  -6     6.27   -32.50   138.10     26 <
  -6  -5  -5     8.83     7.60   142.60     26 <
  -6  -5  -4   114.41   173.50   147.40     26 <
  -6  -5  -3    42.47   302.40   147.50     26 <
  -6  -5  -2    47.58   116.90   150.50     26 <
  -6  -5  -1     6.35   -16.50   128.40     26 <
  -5  -4 -15    35.36   -34.40   131.20     26 <
  -5  -4 -14     3.56   -20.70   129.80     26 <
  -5  -4 -13     9.53     4.50   144.40     26 <
  -5  -4 -12   326.87   399.50   143.90     26 <
  -5  -4 -11   133.97    42.20   147.80     26 <
  -5  -4 -10     1.25    -4.70   134.80     26 <
  -5  -4  -9    27.72   -23.10   126.60     26 <
  -5  -4  -8     4.27    17.80   134.10     26 <
  -5  -4  -7     1.97    21.70   140.10     26 <
  -4  -4  24     0.66   -37.50   129.90     26 <
  -4  -3 -19    31.67   -35.30   124.80     26 <
  -4  -3 -18    79.00    82.70   127.40     26 <
  -4  -3 -17     3.36    29.60   143.70     26 <
  -4  -3 -16   256.25    -8.10   131.10     26 <
  -4  -3 -15    26.23    -2.80   132.50     26 <
  -4  -3 -14    11.94   -50.50   136.80     26 <
  -4  -3 -13   176.94   169.30   145.30     26 <
  -3  -3  15    22.45   -38.50   148.20     26 <
  -3  -3  16    41.71   220.60   135.00     26 <
  -3  -3  17     4.46   108.20   145.30     26 <
  -3  -3  18    11.47   145.10   131.90     26 <
  -3  -3  19   103.62   -46.70   131.60     26 <
  -3  -3  20     7.41   -42.20   131.40     26 <
  -3  -3  21    76.32     3.10   129.70     26 <
  -3  -3  22    30.55   -31.20   132.30     26 <
  -3  -3  23     2.30   -16.80   131.50     26 <
  -3  -3  24    29.89    -2.50   112.10     26 <
  -3  -2 -23     4.11    12.60   131.80     26 <
  -3  -2 -22    22.29    15.00   133.30     26 <
  -3  -2 -21    33.57    25.80   131.40     26 <
  -3  -2 -20   122.95   -30.70   133.80     26 <
  -3  -2 -19   147.01   -22.50   136.10     26 <
  -3  -2 -18     4.51     9.70   135.70     26 <
  -3  -2 -17    35.13   185.40   150.60     26 <
  -2  -2   9    69.46   102.40   195.30     26 <
  -2  -2  10   337.43   388.60   174.00     26 <
  -2  -2  11   327.18   429.40   174.50     26 <
  -2  -2  12   562.72   225.70   179.90     26 <
  -2  -2  13  1124.50  1209.30   165.50     26 o
  -2  -2  14   342.57   450.50   178.90     26 <
  -2  -2  15   355.04   527.10   161.10     26 o
  -2  -2  16    78.55    48.00   146.10     26 <
  -2  -2  17    27.59   -28.50   141.10     26 <
  -2  -2  18    52.08   156.40   142.60     26 <
  -2  -2  19     7.63    89.80   163.50     26 <
  -2  -2  20   853.29  1321.60   151.10     26 o
  -2  -2  21    82.33    -1.80   151.90     26 <
  -2  -2  22     2.07   -29.80   133.70     26 <
  -2  -2  23    52.51   -34.90   134.40     26 <
  -2  -2  24     8.87   -47.90   133.20     26 <
  -2  -1 -27     1.42   -32.20   127.10     26 <
  -2  -1 -26     0.13   -10.60   123.40     26 <
  -2  -1 -25     2.38   197.50   130.20     26 <
  -2  -1 -24    23.16    72.00   125.90     26 <
  -2  -1 -23     6.06    48.40   129.70     26 <
  -2  -1 -22    33.90    89.00   127.30     26 <
  -2  -1 -21    31.63    11.40   129.80     26 <
  -2  -1 -20    66.48     9.00   141.30     26 <
  -1  -1   4  1456.70  1852.50   333.80     26 o
  -1  -1   5  7189.90  7794.70   336.80     26 o
  -1  -1   6  4578.60  4689.80   327.30     26 o
  -1  -1   7  1644.00  1699.50   266.90     26 o
  -1  -1   8     4.47   139.50   262.30     26 <
  -1   0 -30     2.92   -18.80   130.00     26 <
  -1   0 -29    11.81    -4.80   112.10     26 <
  -1   0 -28     0.30    -2.50   112.10     26 <
  -1   0 -27     3.64    -6.20   112.10     26 <
  -1   0 -26     1.44    69.00   129.40     26 <
  -1   0 -25     3.83    83.80   135.10     26 <
  -1   0 -24     2.99    81.00   127.10     26 <
  -1   0 -23     3.08   282.10   143.60     26 <
   0   1 -31     1.69    -7.70   127.50     26 <
   0   1 -30     1.98    87.40   131.10     26 <
   0   1 -29     0.26     8.50   128.90     26 <
   0   1 -28     0.61    21.20   131.20     26 <
   0   1 -27    79.81    67.10   127.80     26 <
   0   1 -26     2.08     5.20   127.50     26 <
   1   1  -5  7290.30  6631.10   336.40     26 o
   1   1  -4  1550.30  1859.60   335.60     26 o
   1   2 -31     7.30    -3.50   121.20     26 <
   1   2 -30     0.43    28.70   132.10     26 <
   1   2 -29     5.47    -4.00   127.20     26 <
   1   2 -28     4.41    92.30   127.60     26 <
   2   2 -10   329.25   192.90   159.40     26 <
   2   2  -9    79.16    17.70   178.80     26 <
   2   2  -8  1823.50  1633.30   173.30     26 o
   2   2  -7    21.51   140.80   232.50     26 <
   2   2  -6  2485.60  2371.00   297.20     26 o
   2   3 -30     0.24    -0.90   112.10     26 <
   3   3 -14   191.08     0.20   129.40     26 <
   3   3 -13    15.13    85.10   129.00     26 <
   3   3 -12     9.36    -7.90   138.20     26 <
   3   3 -11    26.92   168.00   135.30     26 <
   3   3 -10    94.00     2.50   135.20     26 <
   3   3  -9   295.19    14.20   141.70     26 <
   3   3  -8   141.31   146.10   150.80     26 <
   4   4 -17     1.46    -3.00   128.30     26 <
   4   4 -16     3.77   -15.30   130.80     26 <
   4   4 -15    55.54    34.40   131.70     26 <
   4   4 -14     1.38    46.90   126.50     26 <
   4   4 -13    18.24    -8.20   133.60     26 <
   4   4 -12    74.24    85.70   132.60     26 <
   4   4 -11    37.35   -15.30   137.40     26 <
   4   4 -10   198.82    88.00   133.90     26 <
   5   4  23     0.21    37.50   126.80     26 <
   5   4  24     0.85   -18.40   125.70     26 <
   5   4  25     0.86    -4.40   127.70     26 <
   5   5 -20     5.17   -18.10   120.90     26 <
   5   5 -19     9.04   -11.50   126.70     26 <
   5   5 -18     0.66    -4.80   126.60     26 <
   5   5 -17    26.35   -35.00   125.00     26 <
   5   5 -16   128.99    47.80   125.20     26 <
   5   5 -15     1.54    24.00   131.30     26 <
   5   5 -14    39.57    58.80   137.10     26 <
   5   5 -13   157.97   119.70   144.10     26 <
   5   5 -12   402.61   387.50   159.10     26 <
   6   5  17    24.90     0.60   112.10     26 <
   6   5  18     9.19     7.90   127.90     26 <
   6   5  19     6.18     7.00   129.20     26 <
   6   5  20     0.71    51.30   127.60     26 <
   6   5  21     0.27     9.00   128.80     26 <
   6   5  22     5.33   -11.70   122.60     26 <
   6   5  23     0.12    -4.80   112.10     26 <
   6   5  24     0.04   -26.70   128.90     26 <
   6   5  25     0.03    -9.50   127.90     26 <
   6   6 -22     1.38   -19.70   127.60     26 <
   6   6 -21     1.20    14.90   132.60     26 <
   6   6 -20     4.70    31.50   125.70     26 <
   6   6 -19     0.42    12.20   130.10     26 <
   6   6 -18     2.77   -23.80   126.90     26 <
   6   6 -17     0.38    -9.10   112.10     26 <
   6   6 -16     2.57    78.20   125.80     26 <
   6   6 -15    35.84    97.20   131.20     26 <
   6   6 -14     9.48   -35.40   130.60     26 <
   6   6 -13     5.93    14.00   130.00     26 <
   7   6  13    49.31     9.00   134.30     26 <
   7   6  14    39.76    76.60   133.60     26 <
   7   6  15    25.20   -19.00   131.90     26 <
   7   6  16     8.05   -16.70   132.20     26 <
   7   6  17     6.60   103.10   133.00     26 <
   7   6  18    15.03     5.30   127.00     26 <
   7   6  19     4.62   -22.00   127.30     26 <
   7   6  20     2.66    15.50   128.10     26 <
   7   6  21     0.10   -39.20   124.30     26 <
   7   7 -20     4.42    49.90   129.30     26 <
   7   7 -19     0.70    51.00   135.20     26 <
   7   7 -18     1.86   101.70   130.40     26 <
   7   7 -17     0.13    25.40   131.70     26 <
   7   7 -16     2.60   -24.10   131.20     26 <
   7   7 -15     1.73   -12.80   127.20     26 <
   7   7 -14     4.49    -4.10   112.10     26 <
   7   7 -13     3.07   -30.40   127.80     26 <
   8   7  10     0.92   166.10   134.00     26 <
   8   7  11     0.20    10.20   140.80     26 <
   8   8 -15     0.28   -44.40   141.60     26 <
   8   8 -14     0.13    69.90   138.70     26 <
  -7  -6  14    42.87   177.10   148.60     27 <
  -7  -6  15    28.51    56.70   144.60     27 <
  -7  -6  16     9.98     0.20   130.80     27 <
  -7  -6  17     7.37   -54.80   137.60     27 <
  -7  -6  18    18.23   -39.10   131.80     27 <
  -7  -6  19     5.97    65.30   135.00     27 <
  -7  -6  20     3.97   -35.20   137.40     27 <
  -7  -6  21     0.39   -43.40   132.80     27 <
  -7  -5 -22    62.01    58.10   130.10     27 <
  -7  -5 -21     3.52   -45.80   130.30     27 <
  -7  -5 -20     2.80    20.00   137.20     27 <
  -7  -5 -19     0.80   -36.50   127.50     27 <
  -6  -5   1     8.86    54.30   139.20     27 <
  -6  -5   2    53.16   107.40   144.60     27 <
  -6  -5   3    39.92   113.20   144.20     27 <
  -6  -5   4   129.19    85.80   149.20     27 <
  -6  -5   5     6.92   202.00   141.70     27 <
  -6  -5   6     9.06   -15.80   112.10     27 <
  -6  -5   7    12.63    81.30   130.60     27 <
  -6  -5   8    26.92    -7.50   135.60     27 <
  -6  -5   9    32.58    51.70   131.40     27 <
  -6  -5  10     2.10   -14.60   131.70     27 <
  -6  -5  11     9.08    54.70   129.30     27 <
  -6  -5  12    58.89    -4.70   131.70     27 <
  -6  -5  13    74.97   -31.50   129.40     27 <
  -6  -5  14     0.79   -19.30   135.10     27 <
  -6  -5  15     6.33    67.40   128.00     27 <
  -6  -5  16    46.79   -17.40   137.40     27 <
  -6  -5  17    21.25   -31.50   135.20     27 <
  -6  -5  18     6.23   -31.50   129.00     27 <
  -6  -5  19     7.97   121.00   134.60     27 <
  -6  -5  20     0.48     7.10   138.80     27 <
  -6  -5  21     0.50    93.20   139.50     27 <
  -6  -5  22     3.93   -29.20   129.10     27 <
  -6  -5  23     0.18    44.80   133.00     27 <
  -6  -5  24     0.10   101.80   136.80     27 <
  -6  -4 -25     5.01   -39.00   126.50     27 <
  -5  -4  -9    33.85    86.60   135.10     27 <
  -5  -4  -8     9.47    38.00   135.00     27 <
  -5  -4  -7     7.21    42.80   139.20     27 <
  -5  -4  -6   350.74   190.70   136.40     27 <
  -5  -4  -5     9.48   -38.90   142.00     27 <
  -5  -4  -4   145.40   189.40   135.80     27 <
  -5  -4  -3    17.61     5.80   151.70     27 <
  -5  -4  -2   802.90   672.70   146.40     27 o
  -5  -4  -1   277.02   191.20   151.40     27 <
  -5  -4   1   285.50   118.70   151.50     27 <
  -5  -4   2   914.62  1075.50   157.00     27 o
  -4  -3 -17     8.21   -32.40   138.40     27 <
  -4  -3 -16   286.23   411.60   135.40     27 o
  -4  -3 -15    26.92    72.70   135.60     27 <
  -4  -3 -14    15.19    87.10   136.00     27 <
  -4  -3 -13   166.50   132.10   142.90     27 <
  -4  -3 -12   133.50   107.60   138.10     27 <
  -4  -3 -11     2.58   -32.50   138.30     27 <
  -4  -3 -10    46.01   127.70   135.50     27 <
  -4  -3  -9     5.24    43.00   142.70     27 <
  -3  -2 -24     1.41   -15.00   126.10     27 <
  -3  -2 -23     6.07     0.40   127.60     27 <
  -3  -2 -22    25.82    40.50   125.90     27 <
  -3  -2 -21    37.66   -16.00   130.40     27 <
  -3  -2 -20   138.61   -19.40   130.20     27 <
  -3  -2 -19   158.27    79.80   127.50     27 <
  -3  -2 -18     5.19    22.30   128.80     27 <
  -3  -2 -17    33.41   -35.80   140.80     27 <
  -3  -2 -16   639.77   587.20   137.90     27 o
  -2  -2  19    17.76    31.80   156.80     27 <
  -2  -2  20   826.77  1122.80   144.70     27 o
  -2  -2  21    73.05    33.90   148.10     27 <
  -2  -2  22     4.05     4.70   130.10     27 <
  -2  -2  23    48.11    91.50   126.50     27 <
  -2  -2  24     4.59    -5.20   126.40     27 <
  -2  -1 -29     2.04    32.50   124.80     27 <
  -2  -1 -28     5.72    -6.90   122.90     27 <
  -2  -1 -27     1.10    41.30   121.20     27 <
  -2  -1 -26     0.24    26.10   125.60     27 <
  -2  -1 -25     5.53    27.30   124.40     27 <
  -2  -1 -24    24.61    -8.40   129.40     27 <
  -2  -1 -23     9.12    92.70   129.70     27 <
  -2  -1 -22    37.88    36.00   129.70     27 <
  -2  -1 -21    39.18    -6.50   131.70     27 <
  -1  -1   8    25.41   273.50   258.00     27 <
  -1  -1   9  5922.60  5242.10   228.00     27 o
  -1  -1  10    16.60    51.00   214.70     27 <
  -1  -1  11   114.62   136.70   170.50     27 <
  -1  -1  12   283.67   343.80   167.90     27 <
  -1  -1  13   380.85   334.20   168.60     27 <
  -1  -1  14   846.10   788.20   157.10     27 o
  -1  -1  15   200.18    71.70   150.60     27 <
  -1  -1  16    36.10   -27.40   136.80     27 <
  -1  -1  17     8.96     8.90   135.60     27 <
  -1  -1  18   146.11   121.00   142.10     27 <
  -1  -1  19   174.10   114.40   128.80     27 <
  -1  -1  20    69.36   145.60   140.20     27 <
  -1  -1  21     9.04    59.10   126.00     27 <
  -1  -1  22    60.00    -0.90   127.40     27 <
  -1  -1  23     8.14    -3.50   112.10     27 <
  -1  -1  24    19.22     0.30   112.10     27 <
  -1  -1  25     4.34   -18.20   128.00     27 <
  -1   0 -31     0.95     0.70   112.10     27 <
  -1   0 -30     3.13   -26.30   124.20     27 <
  -1   0 -29    10.84   -20.10   124.10     27 <
  -1   0 -28     1.54   -19.50   123.30     27 <
  -1   0 -27     5.16    -4.20   112.10     27 <
  -1   0 -26     2.12   -17.40   123.10     27 <
  -1   0 -25     4.71   -14.50   125.80     27 <
   0   1 -31     2.59   -17.70   122.60     27 <
   0   1 -30     3.74   -15.20   121.30     27 <
   0   1 -29     1.38    24.80   129.60     27 <
   1   1 -10    13.22    63.00   219.20     27 <
   1   1  -9  5830.10  6560.60   220.50     27 o
   1   1  -8    20.15  -100.00   254.30     27 <
   1   1  -7  1907.00  1986.70   266.60     27 o
   1   1  -6  6282.50  6355.10   341.60     27 o
   2   2 -17    38.80     6.20   128.50     27 <
   2   2 -16    83.79   -30.40   134.50     27 <
   2   2 -15   385.76   163.10   146.80     27 <
   2   2 -14   321.09   358.60   156.80     27 <
   2   2 -13  1029.80  1318.10   172.60     27 o
   2   2 -12   652.98   878.80   163.80     27 o
   2   2 -11   420.46   205.90   163.90     27 <
   3   3 -22    32.87     0.70   112.10     27 <
   3   3 -21    93.36   -13.20   122.30     27 <
   3   3 -20     6.41   -22.90   120.70     27 <
   3   3 -19   122.09    16.80   126.00     27 <
   3   3 -18    11.34    -7.90   127.80     27 <
   3   3 -17     4.37   -22.60   125.40     27 <
   3   3 -16    28.76   -27.10   128.70     27 <
   3   3 -15    18.87   -21.60   122.00     27 <
   4   4 -27     0.35    -2.70   112.10     27 <
   4   4 -26     5.48   -25.50   123.20     27 <
   4   4 -25     2.25   -21.10   122.50     27 <
   4   4 -24     0.35    26.50   124.50     27 <
   4   4 -23    17.18   -12.70   120.90     27 <
   4   4 -22     2.11    -6.20   112.10     27 <
   4   4 -21     9.81    -9.30   125.80     27 <
   4   4 -20    17.82    36.80   130.90     27 <
   4   4 -19     5.35    50.90   122.40     27 <
   4   4 -18     6.05    -1.60   123.70     27 <
   5   4  13    11.26    78.80   143.10     27 <
   5   4  14     4.90    -1.50   120.10     27 <
   5   4  15    34.88    93.60   128.40     27 <
   5   4  16    77.36    36.40   123.30     27 <
   5   4  17     3.29     0.60   126.50     27 <
   5   4  18    11.99    -3.00   126.00     27 <
   5   4  19    46.69   -25.90   128.10     27 <
   5   4  20    46.93   -10.20   124.20     27 <
   5   4  21     1.79    78.00   124.50     27 <
   5   4  22     7.28    10.50   129.30     27 <
   5   4  23     1.10    -9.00   124.40     27 <
   5   4  24     2.76     1.60   123.00     27 <
   5   4  25     1.19    -6.60   112.10     27 <
   5   5 -27     5.44    -4.50   112.10     27 <
   5   5 -26     0.37    96.50   129.30     27 <
   5   5 -25     1.80    75.30   128.90     27 <
   5   5 -24    35.71   -10.10   121.40     27 <
   5   5 -23     6.75    85.60   123.50     27 <
   5   5 -22   186.62    -5.60   121.20     27 <
   5   5 -21    45.89   -22.50   124.60     27 <
   6   5   4   140.25     0.80   131.60     27 <
   6   5   5     9.97   -30.70   134.00     27 <
   6   5   6     8.68     8.10   132.70     27 <
   6   5   7    12.19   146.60   132.90     27 <
   6   5   8    29.09    -3.30   131.30     27 <
   6   5   9    28.55    -5.40   112.10     27 <
   6   5  10     2.28   -20.20   129.20     27 <
   6   5  11     6.93   -16.60   125.30     27 <
   6   5  12    53.08    61.00   130.30     27 <
   6   5  13    72.42    -9.20   127.70     27 <
   6   5  14     1.13    34.10   128.30     27 <
   6   5  15     6.53    24.20   130.20     27 <
   6   5  16    40.92    -5.70   130.70     27 <
   6   5  17    19.52   -23.10   124.90     27 <
   6   5  18     6.13   -13.20   125.40     27 <
   6   5  19     7.76    14.40   127.60     27 <
   6   5  20     0.79    -2.40   119.90     27 <
   6   5  21     0.32     1.70   126.00     27 <
   6   5  22     4.30     0.70   112.10     27 <
   6   5  23     0.09    10.10   121.90     27 <
   6   5  24     0.14    -6.80   123.60     27 <
   6   5  25     0.09    -8.10   112.10     27 <
   6   6 -24     3.61   -11.60   130.60     27 <
   6   6 -23    12.68    -5.20   112.10     27 <
   7   6  -3    43.93    -0.20   125.80     27 <
   7   6  -2     1.92   115.00   127.80     27 <
   7   6  -1    12.92   -29.30   131.70     27 <
   7   6   1    10.69    27.00   131.20     27 <
   7   6   2     1.36   -32.70   127.10     27 <
   7   6   3    35.54    -6.20   112.10     27 <
   7   6   4    20.32   129.80   134.70     27 <
   7   6   5    63.92     8.10   132.20     27 <
   7   6   6     3.65   110.60   134.60     27 <
   7   6   7    41.88   -10.10   132.80     27 <
   7   6   8    15.12   -37.80   126.30     27 <
   7   6   9    23.01    -4.40   112.10     27 <
   7   6  10     1.60    34.90   128.30     27 <
   7   6  11     0.38   -21.90   124.30     27 <
   7   6  12    25.56    -6.60   130.50     27 <
   7   6  13    44.47   -19.30   123.80     27 <
   7   6  14    38.82     0.80   112.10     27 <
   7   6  15    23.38    37.40   129.40     27 <
   7   6  16     9.13    55.50   130.10     27 <
   7   6  17     7.10    92.60   125.40     27 <
   7   6  18    19.71   -31.90   127.20     27 <
   7   6  19     4.73     2.40   131.30     27 <
   7   6  20     2.34   -15.60   123.80     27 <
   7   6  21     0.46   -11.20   112.10     27 <
   8   7  -8     2.26     0.20   112.10     27 <
   8   7  -7     0.49     0.70   112.10     27 <
   8   7  -6    10.33    44.50   135.80     27 <
   8   7  -5     2.04   -33.40   135.60     27 <
   8   7  -4    11.58   -45.00   131.00     27 <
   8   7  -3    11.12    -7.40   129.10     27 <
   8   7  -2     3.79   -27.40   128.90     27 <
   8   7  -1     2.09    98.40   137.00     27 <
   8   7   1     2.47   -46.90   134.00     27 <
   8   7   2     3.81    14.00   137.30     27 <
   8   7   3    12.27    -6.20   134.60     27 <
   8   7   4    13.53   -21.10   130.30     27 <
   8   7   5     1.49   108.70   136.40     27 <
   8   7   6    12.06   -20.30   136.90     27 <
   8   7   7     1.09    16.30   128.10     27 <
   8   7   8     2.12   -39.20   130.80     27 <
   8   7   9    12.21   -15.30   129.80     27 <
   8   7  10     0.74   184.80   140.30     27 <
   8   7  11     0.39   -11.20   136.10     27 <
   8   7  12     5.74   -21.10   112.10     27 <
  -7  -5 -22    49.82    62.10   131.10     28 <
  -7  -5 -21     3.82    54.30   135.60     28 <
  -7  -5 -20     3.61     8.10   131.10     28 <
  -7  -5 -19     2.53   -31.70   134.90     28 <
  -7  -5 -18     1.51     1.10   132.80     28 <
  -7  -5 -17    17.49   -18.20   133.20     28 <
  -5  -4  -4   147.28   327.80   136.10     28 <
  -5  -4  -3    49.74    -8.40   156.10     28 <
  -5  -4  -2   636.15  1063.40   156.70     28 o
  -5  -4  -1   207.59   395.00   156.70     28 <
  -5  -4   1   223.81   268.80   152.00     28 <
  -5  -4   2   595.79   673.40   142.70     28 o
  -5  -4   3    16.92     1.10   148.90     28 <
  -5  -4   4   126.29   192.80   134.40     28 <
  -5  -4   5    10.13   -11.90   142.90     28 <
  -5  -4   6   237.79   231.00   135.10     28 <
  -5  -4   7    12.56    59.30   142.10     28 <
  -5  -4   8    10.55    10.70   140.80     28 <
  -5  -4   9    19.04   165.40   136.70     28 <
  -5  -4  10     8.20   141.40   146.00     28 <
  -5  -4  11    99.89   334.50   154.70     28 <
  -5  -4  12   249.20   416.50   149.90     28 <
  -5  -4  13     7.17    21.60   142.90     28 <
  -5  -4  14     5.71   -28.70   134.30     28 <
  -5  -4  15    28.50   112.40   129.10     28 <
  -5  -4  16    48.56   -16.90   131.40     28 <
  -5  -4  17     5.75   -10.70   127.80     28 <
  -5  -4  18     6.75   119.00   129.60     28 <
  -5  -4  19    33.57   -29.90   129.40     28 <
  -5  -4  20    42.32    59.90   128.60     28 <
  -5  -4  21     3.89   -17.40   129.50     28 <
  -5  -4  22     5.91     3.40   121.40     28 <
  -5  -4  23     2.39   -12.20   127.50     28 <
  -5  -4  24     6.71    16.20   130.40     28 <
  -4  -3 -19    28.12   -18.80   124.30     28 <
  -4  -3 -18    64.18    41.90   127.70     28 <
  -4  -3 -17    16.13    -0.30   135.60     28 <
  -4  -3 -16   224.85   352.10   134.00     28 <
  -4  -3 -15    19.61    18.90   137.70     28 <
  -4  -3 -14    17.99     5.80   128.00     28 <
  -4  -3 -13   146.49    71.10   132.20     28 <
  -4  -3 -12   132.88    64.00   132.90     28 <
  -4  -3 -11     8.77   113.60   138.00     28 <
  -4  -3 -10    37.49     9.10   129.30     28 <
  -4  -3  -9    43.51    49.80   130.20     28 <
  -4  -3  -8   110.40    44.40   146.60     28 <
  -4  -3  -7   224.01   613.70   139.50     28 o
  -4  -3  -6   179.51   293.80   152.00     28 <
  -3  -2 -29    20.40    63.00   121.60     28 <
  -3  -2 -28     7.57   -16.30   124.90     28 <
  -3  -2 -27     6.04   -11.20   125.40     28 <
  -3  -2 -26     6.87   -22.20   119.70     28 <
  -3  -2 -25    15.10   -16.90   123.90     28 <
  -3  -2 -24     1.27   -18.10   120.30     28 <
  -3  -2 -23     8.61   125.10   134.80     28 <
  -3  -2 -22    22.07    24.10   128.10     28 <
  -3  -2 -21    22.12    -6.50   112.10     28 <
  -3  -2 -20   121.87   125.60   129.80     28 <
  -3  -2 -19   155.74   114.60   128.20     28 <
  -3  -2 -18     7.21   -21.90   127.90     28 <
  -3  -2 -17    39.86    23.10   144.10     28 <
  -2  -1 -31     0.13    -2.50   112.10     28 <
  -2  -1 -30     5.98    27.60   126.20     28 <
  -2  -1 -29     1.30   -16.90   127.50     28 <
  -2  -1 -28     1.84    -7.80   122.20     28 <
  -2  -1 -27     1.14   -24.80   120.90     28 <
  -2  -1 -26     0.92    56.50   122.70     28 <
  -2  -1 -25     1.70    -3.10   124.80     28 <
  -2  -1 -24    31.02    14.70   127.90     28 <
  -1   0 -31     2.06    -7.60   120.00     28 <
  -1   0 -30     3.38    -7.50   127.60     28 <
   0   0  10  9957.30  9895.80   332.90     28 o
   0   0  11  5486.90  4355.80   298.60     28 o
   0   0  12  2246.90  1365.70   275.40     28 o
   0   0  13  8481.90  8212.50   243.80     28 o
   0   0  14  1105.80   564.30   228.70     28 <
   0   0  15   140.59   146.00   161.60     28 <
   0   0  16   261.31   154.90   166.40     28 <
   0   0  17  1256.90  1428.60   168.30     28 o
   0   0  18   646.80   772.00   168.60     28 o
   0   0  19    86.71   -16.70   199.00     28 <
   0   0  20  2941.70  4204.20   192.50     28 o
   0   0  21   269.32   203.10   194.20     28 <
   0   0  22   106.95    93.30   135.30     28 <
   0   0  23    58.05     4.80   130.10     28 <
   0   0  24    24.11    -1.30   128.50     28 <
   0   0  25    77.97    17.50   123.10     28 <
   1   1 -18   119.14    -5.10   133.60     28 <
   1   1 -17    14.52    52.00   125.30     28 <
   1   1 -16    19.37   -37.70   136.80     28 <
   1   1 -15   128.47   160.80   149.30     28 <
   1   1 -14   638.66   564.50   162.60     28 o
   1   1 -13   304.64   238.10   167.60     28 <
   1   1 -12   280.62   223.90   155.40     28 <
   1   1 -11    61.29    92.10   166.30     28 <
   1   1 -10    18.45    82.10   228.40     28 <
   2   2 -27    10.62   -22.90   122.00     28 <
   2   2 -26    14.46    -5.20   124.80     28 <
   2   2 -25     2.86   127.80   124.70     28 <
   2   2 -24     3.42   -10.90   123.70     28 <
   2   2 -23    47.62    50.20   129.30     28 <
   2   2 -22     4.52   -12.20   127.90     28 <
   2   2 -21    48.08    60.50   146.50     28 <
   2   2 -20   540.96  1239.10   146.30     28 o
   2   2 -19    13.95   -25.70   154.20     28 <
   2   2 -18    96.45   332.10   132.80     28 <
   2   2 -17    23.67    18.00   140.30     28 <
   2   2 -16    67.43   -36.90   143.40     28 <
   3   3 -30     1.24   -17.70   120.10     28 <
   3   3 -29     0.96    -6.60   112.10     28 <
   3   3 -28     1.53    18.70   130.60     28 <
   3   3 -27     5.14    -0.50   122.80     28 <
   3   3 -26     2.90   -12.90   123.50     28 <
   3   3 -25     5.59   -10.40   122.70     28 <
   3   3 -24    24.07     0.40   112.10     28 <
   3   3 -23     5.55    -4.60   121.60     28 <
   3   3 -22    24.39    43.00   124.70     28 <
   4   4 -29     0.39   -10.00   124.10     28 <
   4   4 -28     1.18   -15.90   124.50     28 <
   4   4 -27     0.62    -4.80   112.10     28 <
   4   4 -26     6.14    -2.20   112.10     28 <
   5   4   6   410.40   388.20   137.20     28 <
   5   4   7    32.49    28.20   137.20     28 <
   5   4   8    30.31    31.70   130.00     28 <
   5   4   9    41.91   -33.40   130.60     28 <
   5   4  10    57.13    -4.30   112.10     28 <
   5   4  11   161.58   116.40   140.80     28 <
   5   4  12   286.75   475.90   140.50     28 o
   5   4  13     9.15    55.50   141.70     28 <
   5   4  14     7.81    -5.00   123.00     28 <
   5   4  15    23.07   -36.20   123.20     28 <
   5   4  16    47.66    13.00   127.10     28 <
   5   4  17     4.90     1.40   124.10     28 <
   5   4  18    21.92    -2.40   112.10     28 <
   5   4  19    31.09    20.30   129.00     28 <
   5   4  20    30.51    -5.80   124.90     28 <
   5   4  21     3.60    27.50   127.40     28 <
   5   4  22     6.72    11.10   126.80     28 <
   5   4  23     2.47    -3.80   112.10     28 <
   5   4  24     4.30   -12.10   121.60     28 <
   5   4  25     1.96    13.20   123.50     28 <
   6   5  -9    42.48    -7.50   128.00     28 <
   6   5  -8    34.88    47.60   131.20     28 <
   6   5  -7    26.57     2.50   120.60     28 <
   6   5  -6    11.41   -28.70   126.90     28 <
   6   5  -5    13.61    38.00   129.00     28 <
   6   5  -4   119.79     0.10   131.60     28 <
   6   5  -3    37.19   184.80   134.90     28 <
   6   5  -2    35.62    57.20   134.40     28 <
   6   5  -1    14.30    47.20   131.40     28 <
   6   5   1    12.89   -16.80   129.10     28 <
   6   5   2    31.56   119.00   136.20     28 <
   6   5   3    22.37   135.30   140.20     28 <
   6   5   4   112.63    49.00   135.80     28 <
   6   5   5     9.03    59.50   127.70     28 <
   6   5   6     6.52    37.00   130.20     28 <
   6   5   7     8.99   113.10   137.90     28 <
   6   5   8    23.11    44.40   134.70     28 <
   6   5   9    14.00   235.80   135.70     28 <
   6   5  10     2.77   110.90   126.90     28 <
   6   5  11     8.41     3.30   128.50     28 <
   6   5  12    50.10   -29.20   128.90     28 <
   6   5  13    64.44    -1.80   112.10     28 <
   6   5  14     1.82   -13.30   128.40     28 <
   6   5  15     4.49   -19.10   125.10     28 <
   6   5  16    41.37     7.10   127.80     28 <
   6   5  17    15.90    18.50   122.00     28 <
   6   5  18     8.32   -15.40   125.60     28 <
   6   5  19     4.08     7.00   130.10     28 <
   6   5  20     2.02     8.50   121.20     28 <
   6   5  21     1.58    38.90   128.90     28 <
   6   5  22     4.69    57.90   125.80     28 <
   6   5  23     0.32   -24.50   124.40     28 <
   6   5  24     0.45    17.50   127.50     28 <
   6   5  25     0.38    -1.50   112.10     28 <
   7   6 -18    17.28   -28.60   123.30     28 <
   7   6 -17     6.73    -1.10   123.80     28 <
   7   6 -16    12.50   182.30   129.40     28 <
   7   6 -15    22.93   -28.50   127.70     28 <
   7   6 -14    25.32    51.30   127.00     28 <
   7   6 -13    22.01    87.70   130.10     28 <
   7   6 -12    18.67   -20.00   130.30     28 <
   7   6 -11     1.75   -15.80   121.30     28 <
   7   6 -10     4.48     0.40   112.10     28 <
   7   6  -9    20.80   -33.90   126.00     28 <
   7   6  -8    22.51   -27.80   129.40     28 <
   7   6  -7    26.14    65.30   130.10     28 <
   7   6  -6     2.85    51.00   130.70     28 <
   7   6  -5    58.44    74.80   133.10     28 <
   7   6  -4    20.27    -4.50   112.10     28 <
   7   6  -3    36.03   112.40   129.70     28 <
   7   6  -2     8.39    -2.50   129.40     28 <
   7   6  -1    13.24    -5.20   131.90     28 <
   7   6   1    12.84   -22.80   129.00     28 <
   7   6   2     4.13    89.90   127.00     28 <
   7   6   3    29.70    16.60   131.40     28 <
   7   6   4    17.36    56.60   130.10     28 <
   7   6   5    59.74   -17.60   127.50     28 <
   7   6   6     4.16     2.30   129.40     28 <
   7   6   7    31.06    15.30   133.30     28 <
   7   6   8     8.71   -12.10   130.50     28 <
   7   6   9    22.66    -7.20   112.10     28 <
   7   6  10     0.62   -24.60   127.10     28 <
   7   6  11     0.62   -35.90   124.80     28 <
   7   6  12    24.69     1.50   130.60     28 <
   7   6  13    42.69   -10.10   127.80     28 <
   7   6  14    32.71   -12.20   112.10     28 <
   7   6  15    22.37   -24.90   124.90     28 <
   7   6  16     5.40   -36.00   126.20     28 <
   7   6  17     9.85    27.10   127.20     28 <
   7   6  18    10.17    79.40   125.70     28 <
   7   6  19     4.52   -28.80   128.10     28 <
   7   6  20     2.19   -16.50   126.20     28 <
   7   6  21     1.96    29.20   128.60     28 <
   8   7 -16    22.17    43.70   128.60     28 <
   8   7 -15     0.11    18.50   134.30     28 <
   8   7 -14     3.15    37.80   134.70     28 <
   8   7 -13     6.19   -30.90   130.60     28 <
   8   7 -12     4.29   -41.20   131.00     28 <
   8   7 -11     0.59   -16.50   131.50     28 <
   8   7 -10     1.41    -3.60   131.30     28 <
   8   7  -9    10.42    -8.00   132.60     28 <
   8   7  -8     3.07    27.90   131.80     28 <
   8   7  -7     1.34   -49.80   126.90     28 <
   8   7  -6     8.74    47.30   133.10     28 <
   8   7  -5     1.53    80.40   135.30     28 <
   8   7  -4    10.62   -27.20   133.20     28 <
   8   7  -3    12.54   -22.70   132.10     28 <
  -7  -5 -22    55.70    -3.50   133.20     29 <
  -7  -5 -21     5.68    93.20   134.10     29 <
  -7  -5 -20     2.16   -12.40   134.50     29 <
  -7  -5 -19     2.23   -45.90   134.50     29 <
  -7  -5 -18     2.51    -8.50   131.20     29 <
  -7  -5 -17    17.17    70.40   130.50     29 <
  -7  -5 -16     9.23   -24.40   134.10     29 <
  -7  -5 -15     1.16    48.60   135.60     29 <
  -7  -5 -14    64.78    56.80   136.60     29 <
  -7  -5 -13    11.39    44.20   137.40     29 <
  -7  -5 -12    29.43   121.10   140.50     29 <
  -7  -5 -11    46.68   113.60   132.80     29 <
  -7  -5 -10     7.86    89.80   139.60     29 <
  -7  -5  -9    21.82    54.00   138.30     29 <
  -7  -5  -8    12.79    29.60   137.10     29 <
  -7  -5  -7     2.14   -35.70   133.00     29 <
  -7  -5  -6    30.24   -22.20   136.60     29 <
  -7  -5  -5     0.61    59.50   130.00     29 <
  -7  -5  -4    47.93   145.10   140.70     29 <
  -7  -5  -3     0.52   -45.20   135.90     29 <
  -7  -5  -2    21.92   110.90   136.00     29 <
  -7  -5  -1     8.31   127.10   139.20     29 <
  -7  -5   0    64.56   -25.30   137.10     29 <
  -7  -5   1     7.45    99.20   138.50     29 <
  -7  -5   2    24.78   -46.50   134.90     29 <
  -7  -5   3     0.60     5.60   138.50     29 <
  -7  -5   4    40.35   105.20   140.10     29 <
  -7  -5   5     1.31   -32.10   136.40     29 <
  -7  -5   6    29.15   -40.70   137.20     29 <
  -7  -5   7     1.39   -13.40   133.50     29 <
  -7  -5   8    19.53   -47.20   136.80     29 <
  -7  -5   9    27.90    -4.80   136.70     29 <
  -7  -5  10    13.00    -0.80   139.10     29 <
  -7  -5  11    51.01   -23.20   137.00     29 <
  -7  -5  12    29.78   -41.00   136.60     29 <
  -7  -5  13    12.04     2.70   135.30     29 <
  -7  -5  14    87.60    91.70   137.60     29 <
  -7  -5  15     1.41   150.00   138.30     29 <
  -7  -5  16     9.23   187.20   136.20     29 <
  -7  -5  17    15.71    32.10   133.60     29 <
  -7  -5  18     1.30    29.70   134.40     29 <
  -7  -5  19     0.81    41.60   139.90     29 <
  -7  -5  20     2.72   -12.00   134.50     29 <
  -7  -5  21     1.95   152.90   140.60     29 <
  -7  -5  22    33.60    -2.50   132.50     29 <
  -6  -4 -25     4.71    -6.90   127.20     29 <
  -6  -4  19     1.19   173.90   134.70     29 <
  -6  -4  20    17.73   -20.60   132.90     29 <
  -6  -4  21     1.10    57.00   135.80     29 <
  -6  -4  22     3.43    -7.20   127.70     29 <
  -6  -4  23     0.64     0.30   112.10     29 <
  -6  -4  24     0.58    -3.70   112.10     29 <
  -4  -3 -20    13.17    17.20   131.00     29 <
  -4  -3 -19    33.44   106.70   131.10     29 <
  -4  -3 -18    61.06   -26.90   126.80     29 <
  -4  -3 -17    10.05    30.00   136.30     29 <
  -4  -3 -16   201.30   225.90   132.60     29 <
  -4  -3 -15    24.27    68.30   139.40     29 <
  -4  -3 -14    10.45     1.70   135.60     29 <
  -4  -3 -13   115.47   263.60   134.60     29 <
  -4  -3 -12   108.96   132.90   131.20     29 <
  -4  -3 -11     4.68    51.10   131.50     29 <
  -4  -3 -10    27.40    53.90   137.00     29 <
  -4  -3  -9     9.21    -8.30   134.80     29 <
  -4  -3  -8    59.78    48.00   141.40     29 <
  -4  -3  -7   174.99   501.60   148.70     29 o
  -4  -3  -6   191.17   242.00   151.30     29 <
  -4  -3  -5    46.01    92.30   153.80     29 <
  -4  -3  -4   386.93   703.70   146.80     29 o
  -4  -3  -3     2.27    -0.90   112.10     29 <
  -4  -3  -2    27.73   -23.60   144.50     29 <
  -4  -3  -1    98.24   164.80   143.00     29 <
  -4  -3   1    88.66   199.00   135.30     29 <
  -4  -3   2    34.14    -0.60   135.30     29 <
  -4  -3   3     3.14     0.40   112.10     29 <
  -4  -3   4   408.73   827.40   144.60     29 o
  -4  -3   5    44.09   -38.00   155.70     29 <
  -4  -3   6   201.27   358.20   150.50     29 <
  -3  -2 -31     4.07   128.90   127.80     29 <
  -3  -2 -30     1.75    -5.40   112.10     29 <
  -3  -2 -29    10.08    64.70   124.60     29 <
  -3  -2 -28    10.11   -10.50   123.80     29 <
  -3  -2 -27     3.52    57.40   125.10     29 <
  -3  -2 -26     7.08   -13.90   122.50     29 <
  -3  -2 -25     7.73   -18.00   124.40     29 <
  -3  -2 -24     4.54   -15.40   125.40     29 <
  -3  -2 -23     5.41     7.60   120.70     29 <
  -3  -2 -22    14.14   -15.90   124.80     29 <
  -3  -2 -21    37.85    -5.50   124.50     29 <
  -3  -2 -20   112.40    68.60   124.60     29 <
  -3  -2 -19   120.05     0.50   112.10     29 <
  -3  -2  14   271.08   228.70   142.50     29 <
  -3  -2  15   204.63   106.70   155.50     29 <
  -3  -2  16   429.17   560.50   147.50     29 o
  -3  -2  17    22.00    25.60   142.90     29 <
  -3  -2  18     8.89   -31.30   130.30     29 <
  -3  -2  19   106.92   136.50   135.40     29 <
  -3  -2  20   113.61   -28.70   124.90     29 <
  -3  -2  21    41.62    29.60   130.10     29 <
  -3  -2  22    14.04    -2.40   125.20     29 <
  -3  -2  23     3.89    -2.90   112.10     29 <
  -3  -2  24     5.55    72.30   128.80     29 <
   0   0 -25    86.14   117.20   131.00     29 <
   0   0 -24    27.68   -23.40   129.80     29 <
   0   0 -23    56.12     6.60   130.90     29 <
   0   0 -22   114.37     9.00   140.10     29 <
   0   0 -21   259.18   121.70   187.40     29 <
   0   0 -20  2852.40  4486.90   179.70     29 o
   0   0 -19    82.26    33.90   196.60     29 <
   0   0 -18   716.15   691.10   165.70     29 o
   0   0 -17  1084.50  1297.70   169.70     29 o
   0   0 -16   203.91   143.60   154.90     29 <
   0   0 -15    95.09    84.60   156.00     29 <
   0   0 -14   858.94   242.20   217.90     29 <
   0   0 -13  7291.30  7344.70   233.60     29 o
   0   0 -12  1995.70  1488.40   267.90     29 o
   0   0 -11  4389.70  4047.90   280.70     29 o
   0   0 -10  7413.80  8217.90   317.30     29 o
   0   0  -9  5729.40  6327.30   423.70     29 o
   0   0  -8 27836.00 28681.70   408.00     29 o
   0   0  -7  3219.00  3464.90   422.90     29 o
   0   0  -6  9648.60  9046.90   353.10     29 o
   0   0  -5  5983.40  4965.40   374.30     29 o
   0   0  -4  6846.60  6036.20   445.70     29 o
   0   0  -3 22268.00 18915.90   585.50     29 o
   0   0  -2 26525.00 31107.50   592.10     29 o
   0   0   2 25995.00 27510.90   590.90     29 o
   0   0   3 22928.00 20833.10   602.90     29 o
   0   0   4  7541.50  6540.80   455.30     29 o
   0   0   5  6403.80  5321.00   382.30     29 o
   0   0   6  9880.90  9099.80   364.60     29 o
   0   0   7  3468.00  3302.10   430.70     29 o
   0   0   8 30432.00 31816.90   428.20     29 o
   0   0   9  6414.10  6049.70   434.60     29 o
   0   0  10  8710.00  7898.20   323.20     29 o
   1   1 -31     0.60   -20.50   125.90     29 <
   1   1 -30     0.64    -0.70   112.10     29 <
   1   1 -29     4.69    81.90   125.40     29 <
   1   1 -28     1.85    -3.50   125.80     29 <
   1   1 -27     9.69    66.70   127.50     29 <
   1   1 -26     2.12    21.50   127.30     29 <
   1   1 -25     8.49   -22.20   124.90     29 <
   1   1 -24     5.03    -2.80   112.10     29 <
   1   1 -23     9.98   -17.50   112.10     29 <
   1   1 -22    46.79   156.40   128.70     29 <
   1   1  17     5.15   -15.40   124.30     29 <
   1   1  18    91.47    64.40   133.70     29 <
   1   1  19   122.38     4.80   128.40     29 <
   1   1  20    44.03    77.60   127.70     29 <
   1   1  21     2.28   -35.10   131.00     29 <
   1   1  22    41.99   -18.00   123.20     29 <
   1   1  23     8.04    70.40   130.50     29 <
   1   1  24     4.86   -18.00   121.60     29 <
   1   1  25     8.32    52.70   128.30     29 <
   4   3 -18    61.99   -20.70   128.20     29 <
   4   3 -17    10.01   -12.40   135.10     29 <
   4   3 -16   207.88   437.10   139.80     29 o
   4   3 -15    20.02    47.00   136.90     29 <
   4   3 -14    11.16   -31.70   136.20     29 <
   4   3 -13   118.75   101.30   137.30     29 <
   4   3 -12   109.24   222.20   137.10     29 <
   4   3 -11     6.60   -26.00   137.40     29 <
   4   3 -10    31.61   110.40   129.70     29 <
   4   3  -9    11.82    -8.80   136.60     29 <
   4   3  -8    68.54   125.40   145.10     29 <
   4   3  -7   176.80   483.20   155.00     29 o
   4   3  -6   195.48   284.20   152.50     29 <
   4   3  -5    44.53    37.50   159.10     29 <
   4   3  -4   405.36  1332.10   150.10     29 o
   4   3  -3     2.59   -21.50   145.40     29 <
   4   3  -2    33.41   -16.10   137.20     29 <
   4   3  -1    87.94   206.70   139.00     29 <
   4   3   1   100.28     3.70   135.80     29 <
   4   3   2    30.33    94.70   136.60     29 <
   4   3   3     3.04   -36.50   146.90     29 <
   5   4 -28     1.18    32.80   123.00     29 <
   5   4 -27     1.37    23.30   124.60     29 <
   5   4 -26     2.40    -0.30   112.10     29 <
   5   4 -25     1.16    88.10   126.40     29 <
   5   4 -24     3.31    55.40   123.90     29 <
   5   4 -23     2.01    86.30   130.40     29 <
   5   4 -22     4.94   100.70   129.10     29 <
   5   4 -21     3.44   -17.60   124.40     29 <
   5   4 -20    26.31   -30.40   122.20     29 <
   5   4 -19    32.90    -2.90   124.10     29 <
   5   4 -18    13.25   -11.30   123.90     29 <
   5   4 -17     4.72     1.80   129.00     29 <
   5   4 -16    46.19   -17.80   125.60     29 <
   5   4 -15    23.14    43.10   134.90     29 <
   5   4 -14     4.82    50.40   132.20     29 <
   5   4 -13     6.86    15.30   139.00     29 <
   5   4 -12   247.46   418.30   132.90     29 o
   5   4 -11    98.56    94.00   140.80     29 <
   5   4 -10     8.85   -10.90   130.90     29 <
   5   4  -9    22.15    79.50   126.10     29 <
   5   4   3    14.34    50.30   150.00     29 <
   5   4   4   113.65   136.60   134.70     29 <
   5   4   5    12.28     6.00   142.90     29 <
   5   4   6   222.18   377.90   136.30     29 <
   5   4   7     9.78    53.50   138.40     29 <
   5   4   8     8.78   140.50   128.80     29 <
   5   4   9    25.49    98.90   139.10     29 <
   5   4  10    14.57    38.50   135.50     29 <
   5   4  11   113.87    13.80   135.90     29 <
   5   4  12   244.84   233.50   134.30     29 <
   5   4  13     5.80    -5.60   112.10     29 <
   5   4  14     6.87    29.80   129.20     29 <
   5   4  15    27.32     1.20   121.80     29 <
   5   4  16    49.23    18.10   128.10     29 <
   5   4  17     2.76   -24.60   125.20     29 <
   5   4  18    30.95   126.20   125.10     29 <
   5   4  19    24.49   -14.60   129.80     29 <
   5   4  20    23.78   -21.30   125.60     29 <
   5   4  21     4.03   -19.90   123.90     29 <
   5   4  22     4.37     0.40   112.10     29 <
   5   4  23     2.31    -6.20   112.10     29 <
   5   4  24     1.77    -1.80   122.50     29 <
   5   4  25     0.72   -21.70   119.80     29 <
   6   5 -25     0.36   -14.80   122.90     29 <
   6   5 -24     0.26   -11.70   112.10     29 <
   6   5 -23     0.39   -10.40   123.70     29 <
   6   5  17    20.51   -19.90   127.40     29 <
   6   5  18     4.18    -2.30   112.10     29 <
   6   5  19     4.53    36.00   124.80     29 <
   6   5  20     1.66     8.60   125.30     29 <
   6   5  21     1.89   -15.80   123.90     29 <
   6   5  22     2.56   -26.60   121.50     29 <
   6   5  23     0.19    -1.30   124.40     29 <
   6   5  24     0.31    61.20   126.70     29 <
   6   5  25     0.34    24.60   129.40     29 <
  -6  -4 -25     6.95     3.90   136.70     30 <
  -6  -4 -24     0.99     7.80   129.30     30 <
  -6  -4 -23     1.11    41.90   131.60     30 <
  -6  -4 -22     4.24    49.00   133.80     30 <
  -6  -4 -21     2.83    75.70   132.40     30 <
  -6  -4 -20    25.41   -38.70   131.50     30 <
  -6  -4 -19     2.00   -33.50   132.40     30 <
  -6  -4 -18     2.39    94.20   132.60     30 <
  -6  -4 -17     1.34   -30.40   129.50     30 <
  -6  -4 -16     5.64    22.80   126.10     30 <
  -6  -4 -15     2.19   -20.00   131.70     30 <
  -6  -4 -14    16.18    55.20   128.80     30 <
  -6  -4 -13    13.14   -23.30   136.10     30 <
  -6  -4 -12     8.68    36.70   137.00     30 <
  -6  -4 -11     4.67   101.40   135.70     30 <
  -6  -4 -10    55.04   -15.10   138.60     30 <
  -6  -4  -9    22.92   -28.90   131.30     30 <
  -6  -4  -8    11.92    -3.50   139.00     30 <
  -6  -4  -7    63.01   261.30   148.20     30 <
  -6  -4  -6     5.03    76.00   151.10     30 <
  -6  -4  -5    59.80   227.70   155.70     30 <
  -6  -4  -4   148.47   411.00   155.70     30 <
  -6  -4  -3    14.55   130.80   150.00     30 <
  -6  -4  -2    38.12    24.40   148.60     30 <
  -6  -4  -1    36.21    90.40   172.20     30 <
  -6  -4   0   959.20  2237.40   168.60     30 o
  -6  -4   1    38.85    45.80   164.50     30 <
  -6  -4   2    39.27     0.90   139.90     30 <
  -6  -4   3    18.50    42.70   147.90     30 <
  -6  -4   4   139.91   386.60   147.00     30 <
  -6  -4   5    62.90    74.10   147.60     30 <
  -6  -4   6     2.48    44.10   147.50     30 <
  -6  -4   7    58.99   164.40   142.50     30 <
  -6  -4   8    14.75    66.60   142.50     30 <
  -6  -4   9    24.81    17.40   138.80     30 <
  -6  -4  10    47.91    90.30   135.60     30 <
  -6  -4  11     4.86   -22.30   130.80     30 <
  -6  -4  12     8.84    48.10   138.60     30 <
  -6  -4  13    16.69    60.70   137.90     30 <
  -6  -4  14    22.31    95.10   136.50     30 <
  -6  -4  15     1.42    -4.40   129.10     30 <
  -6  -4  16     7.23    -3.90   112.10     30 <
  -6  -4  17     1.98   -33.90   130.60     30 <
  -6  -4  18     4.13   -32.80   132.80     30 <
  -6  -4  19     1.89    36.50   132.10     30 <
  -6  -4  20    37.55   -26.50   137.40     30 <
  -6  -4  21     3.62    67.10   133.60     30 <
  -6  -4  22     4.81   -20.30   135.20     30 <
  -6  -4  23     1.97   164.80   142.00     30 <
  -6  -4  24     0.73    -5.10   112.10     30 <
  -5  -3  24    26.71    73.80   128.10     30 <
  -3  -2 -31     7.34   -17.00   120.70     30 <
  -3  -2 -30     1.24    -8.60   112.10     30 <
  -3  -2 -29    27.85   -22.20   129.40     30 <
  -3  -2 -28    19.80   -23.00   124.20     30 <
  -3  -2 -27    10.02    -2.60   125.90     30 <
  -3  -2 -26    11.68   -28.40   121.70     30 <
  -3  -2 -25    16.23    21.50   130.50     30 <
  -3  -2 -24     4.78   137.30   127.60     30 <
  -3  -2 -23     5.84     0.50   112.10     30 <
  -3  -2 -22    19.34     1.70   125.40     30 <
  -3  -2 -21    38.18     2.00   128.50     30 <
  -3  -2 -20   103.75     9.90   135.80     30 <
  -3  -2 -19   122.97   144.00   135.80     30 <
  -3  -2 -18    12.93   -22.50   131.40     30 <
  -3  -2 -17    44.05   142.90   149.00     30 <
  -3  -2 -16   523.27   700.00   156.80     30 o
  -3  -2 -15   212.66     0.80   112.10     30 <
  -3  -2 -14   431.73   804.80   142.80     30 o
  -3  -2 -13   196.74   468.40   167.20     30 <
  -3  -2 -12   222.42   350.90   162.20     30 <
  -3  -2 -11   964.49  1507.50   164.40     30 o
  -3  -2 -10    71.86   170.00   162.30     30 <
  -3  -2  -9    29.46    -2.70   156.20     30 <
  -3  -2  -8   865.96   955.70   161.60     30 o
  -3  -2   4  1036.30  1121.90   196.90     30 o
  -3  -2   5   643.55   575.00   189.70     30 o
  -3  -2   6   561.56   119.70   180.90     30 <
  -3  -2   7   868.33   594.50   180.20     30 o
  -3  -2   8   932.98   756.50   169.70     30 o
  -3  -2   9    17.12    19.80   161.20     30 <
  -3  -2  10   106.80   117.70   154.00     30 <
  -3  -2  11  1035.80   742.70   160.10     30 o
  -3  -2  12   252.86    77.80   152.20     30 <
  -3  -2  13   196.86    36.40   150.70     30 <
  -3  -2  14   410.40   306.30   139.70     30 <
  -3  -2  15   139.66    27.80   157.90     30 <
  -3  -2  16   499.60   684.40   153.30     30 o
  -3  -2  17    46.32    65.40   150.10     30 <
  -3  -2  18    18.90    -6.00   137.40     30 <
  -3  -2  19   129.21    -5.60   134.80     30 <
  -3  -2  20   105.82    82.00   131.70     30 <
  -3  -2  21    34.56   -22.80   136.50     30 <
  -3  -2  22    18.17    84.90   131.70     30 <
  -3  -2  23     6.18   -35.90   130.80     30 <
  -2  -1 -31     0.35    28.80   123.80     30 <
  -2  -1 -30    15.69   -18.10   125.30     30 <
  -2  -1 -29     2.97   -32.10   124.10     30 <
  -2  -1  24    50.86    48.10   135.70     30 <
  -2  -1  25     6.90   -11.60   130.00     30 <
   0   0 -24    48.08   -31.60   123.80     30 <
   0   0 -23    95.90    64.30   136.30     30 <
   0   0 -22   141.61    24.70   127.30     30 <
   0   0 -21   393.69    -9.40   112.10     30 <
   0   0 -20  4748.60  4844.60   192.50     30 o
   0   0 -19   121.99   141.20   211.30     30 <
   0   0 -18  1001.40  1331.60   171.90     30 o
   0   0 -17  1896.10  1383.80   180.30     30 o
   0   0 -16   411.30   322.10   171.30     30 <
   0   0 -15   179.01   260.00   168.20     30 <
   0   0 -14  1426.90   597.00   238.60     30 <
   0   0 -13 11109.00  9746.10   253.30     30 o
   0   0 -12  2736.30  2397.80   291.70     30 o
   0   0 -11  6802.10  5935.40   309.00     30 o
   0   0 -10 12487.00 13198.20   343.20     30 o
   0   0  -9  8492.30  8891.10   476.90     30 o
   0   0  -8 41594.00 38539.00   458.00     30 o
   0   0  -7  4824.80  4749.60   474.60     30 o
   0   0  -6 14444.00 13066.90   392.60     30 o
   0   0  -5  9913.90  9750.70   416.70     30 o
   0   0  -4 10502.00 10807.60   505.30     30 o
   0   0  -3 31737.00 34468.00   650.00     30 o
   0   0  -2 39778.00 36832.10   640.40     30 o
   0   0   2 39180.00 36200.80   650.60     30 o
   0   0   3 33683.00 31462.70   649.00     30 o
   0   0   4 11294.00 11670.40   514.30     30 o
   0   0   5 10246.00 14327.80   451.20     30 o
   0   0   6 14815.00 19885.00   438.30     30 o
   0   0   7  5188.20  6949.40   547.20     30 o
   0   0   8 45416.00 47226.40   533.10     30 o
   0   0   9  9553.70 13053.60   570.80     30 o
   0   0  10 13989.00 12201.00   436.20     30 o
   0   0  11  7821.50 13130.30   392.80     30 o
   1   1 -31     0.50   -37.80   121.30     30 <
   1   1 -30     1.85   -12.60   125.30     30 <
   1   1 -29     8.53    16.70   130.70     30 <
   1   1 -28     3.03   -17.00   133.00     30 <
   1   1 -27     8.00    66.90   134.70     30 <
   1   1 -26     2.39   138.00   133.50     30 <
   1   1 -25    13.59   -14.80   134.20     30 <
   1   1 -24     5.39    -7.10   132.30     30 <
   1   1  19   229.81    51.30   143.60     30 <
   1   1  20    81.63   184.80   135.60     30 <
   1   1  21     2.68    13.60   135.70     30 <
   1   1  22    52.12   -20.20   126.40     30 <
   1   1  23    11.07    11.50   132.50     30 <
   1   1  24     4.93    79.60   130.60     30 <
   1   1  25    11.58    51.00   130.90     30 <
   4   3 -30     1.03    -7.10   112.10     30 <
   4   3 -29     0.97    49.50   127.80     30 <
   4   3 -28     0.74   -19.30   124.60     30 <
   4   3 -27    16.68    36.10   124.50     30 <
   4   3 -26     1.97   -22.90   123.70     30 <
   4   3 -25     1.61   -15.20   127.70     30 <
   4   3 -24     5.44     1.20   127.80     30 <
   4   3 -23     4.37   -10.80   128.90     30 <
   4   3 -22    10.08   -11.90   125.80     30 <
   4   3 -21    16.96   194.40   129.80     30 <
   4   3 -20    10.56    -2.30   112.10     30 <
   4   3 -19    26.68   -29.60   129.80     30 <
   4   3 -18    62.69    48.00   125.70     30 <
   4   3 -17    13.00    26.60   142.00     30 <
   4   3 -16   282.31   400.20   142.70     30 <
   4   3 -15    26.88   133.50   143.10     30 <
   4   3 -14    22.47    -7.20   140.40     30 <
   4   3 -13   204.35   238.90   135.80     30 <
   4   3 -12   182.25     6.30   135.90     30 <
   4   3 -11    11.03    -7.00   138.20     30 <
   4   3 -10    53.38    98.30   138.60     30 <
   4   3  -9    24.33    67.20   145.10     30 <
   4   3  -8   110.68    69.00   150.80     30 <
   4   3  -7   288.13   430.70   157.60     30 <
   4   3  -6   308.67   197.20   152.90     30 <
   4   3  -5    74.14    38.80   156.80     30 <
   4   3   1   157.51   136.40   149.90     30 <
   4   3   2    45.30    -9.10   139.20     30 <
   4   3   3     5.12     6.50   153.10     30 <
   4   3   4   621.73   911.20   151.70     30 o
   4   3   5    60.35    32.90   153.30     30 <
   4   3   6   263.38   -27.40   149.90     30 <
   4   3   7   280.70   567.60   151.70     30 o
   4   3   8   129.63   102.60   151.40     30 <
   4   3   9    64.91    34.80   142.20     30 <
   4   3  10    44.73    52.90   139.60     30 <
   4   3  11     7.42   -17.70   142.30     30 <
   4   3  12   178.55   271.50   145.70     30 <
   4   3  13   188.71   145.90   147.20     30 <
   4   3  14    25.51    65.40   140.80     30 <
   4   3  15    23.07    94.40   146.80     30 <
   4   3  16   226.70   421.00   145.90     30 <
   4   3  17     7.33   -16.60   140.20     30 <
   4   3  18    51.28   106.00   135.10     30 <
   4   3  19    34.17    81.80   136.60     30 <
   4   3  20    11.34    -5.40   134.00     30 <
   4   3  21    18.23    81.90   134.70     30 <
   4   3  22     9.73    50.70   132.20     30 <
   4   3  23     3.17   -13.90   133.10     30 <
   4   3  24     4.98   -14.20   127.80     30 <
   5   4 -28     2.99   -25.30   125.10     30 <
   5   4 -27     1.50    10.10   123.90     30 <
   5   4 -26     3.99   -20.30   125.20     30 <
   5   4 -25     2.07    -3.00   123.80     30 <
   5   4  20    77.51    -1.80   112.10     30 <
   5   4  21     4.06    -4.10   124.90     30 <
   5   4  22     9.19    64.80   131.60     30 <
   5   4  23     1.63   -14.50   126.60     30 <
   5   4  24     7.08   -23.70   123.10     30 <
   5   4  25     2.09   -21.90   127.50     30 <
   8   6 -16     5.07    59.10   140.90     30 <
   8   6 -15    13.37   228.60   136.00     30 <
   8   6 -14     0.29    -2.50   112.10     30 <
   8   6 -13     1.67   -28.50   135.80     30 <
   8   6 -12     0.95   -36.30   127.80     30 <
   8   6 -11     1.11    -0.90   112.10     30 <
   8   6 -10     4.50   -49.90   131.90     30 <
   8   6  -9     2.15   -28.90   131.20     30 <
   8   6  -8     0.35     3.10   131.00     30 <
   8   6  -7     2.47   -58.80   135.50     30 <
   8   6  -6     1.99    68.30   134.10     30 <
   8   6  -5    37.21    -2.20   133.90     30 <
   8   6  -4    37.35   -40.40   137.70     30 <
   8   6  -3     1.66    -4.00   130.40     30 <
   8   6  -2     0.64   -39.20   136.50     30 <
   8   6  -1    54.23    74.50   132.30     30 <
   8   6   0    19.13   -45.20   138.70     30 <
   8   6   1    58.78     1.60   135.90     30 <
   8   6   2     1.28    74.20   140.20     30 <
   8   6   3     1.40    27.60   138.80     30 <
   8   6   4    34.80    95.50   133.70     30 <
   8   6   5    37.65   -49.60   136.90     30 <
   8   6   6     2.32    91.10   135.30     30 <
   8   6   7     2.33     2.70   135.40     30 <
   8   6   8     0.97    -9.20   138.50     30 <
   8   6   9     2.77   123.70   135.50     30 <
   8   6  10     3.83   -45.90   130.50     30 <
   8   6  11     1.14    31.70   137.70     30 <
   8   6  12     1.56    58.50   136.80     30 <
   8   6  13     1.85     6.80   134.30     30 <
   8   6  14     0.43    29.10   135.40     30 <
   8   6  15    11.85   -42.00   135.20     30 <
   8   6  16     5.43   209.80   140.80     30 <
  -7  -4  -3     9.64     8.00   132.60     34 <
  -7  -4  -2     7.40   -11.30   134.00     34 <
  -7  -4  -1    65.14    91.00   138.10     34 <
  -7  -4   1     5.20    -9.60   133.90     34 <
  -7  -4   2     3.82   -46.60   131.70     34 <
  -7  -4   3    13.61   151.30   134.30     34 <
  -7  -4   4    14.13    37.30   135.90     34 <
  -7  -3  18    47.85    15.30   131.40     34 <
  -7  -3  19     3.57    73.40   131.00     34 <
  -7  -3  20     5.10    23.70   138.30     34 <
  -7  -3  21    11.94    60.30   133.30     34 <
  -7  -3  22    11.93   -39.20   126.50     34 <
  -6  -4 -20    44.51    -8.80   132.80     34 <
  -6  -4 -19     7.81   -21.60   131.90     34 <
  -6  -4 -18     1.28   111.90   133.70     34 <
  -6  -4 -17     3.15    -6.10   123.40     34 <
  -6  -4 -16     3.33    43.70   136.70     34 <
  -6  -4 -15     2.02   142.20   138.70     34 <
  -6  -4 -14    33.42    58.40   126.70     34 <
  -6  -4 -13    18.27    51.30   134.00     34 <
  -6  -4 -12    11.43    70.40   132.50     34 <
  -6  -4 -11    11.15    48.90   125.80     34 <
  -6  -4 -10    49.10    -6.00   112.10     34 <
  -6  -3   8     6.93    59.00   132.40     34 <
  -6  -3   9    19.13    45.60   132.30     34 <
  -6  -3  10     6.90   -11.40   133.10     34 <
  -6  -3  11    20.21    95.50   132.80     34 <
  -6  -3  12     1.57   -33.40   137.90     34 <
  -6  -3  13    22.87   -28.50   128.70     34 <
  -5  -4 -28     8.49    -6.30   127.00     34 <
  -5  -4 -27     3.53    40.40   125.00     34 <
  -5  -3  -4   766.46   905.40   151.50     34 o
  -5  -3  -3    45.62   -37.80   162.30     34 <
  -5  -3  -2   402.94   832.80   145.70     34 o
  -5  -3  -1    21.40    21.40   164.80     34 <
  -5  -3   0   788.86   430.40   146.60     34 <
  -5  -2  16   340.71   474.50   142.90     34 o
  -5  -2  17    49.55   -29.30   141.10     34 <
  -5  -2  18    14.60     1.70   128.30     34 <
  -5  -2  19    58.78    -6.00   134.10     34 <
  -5  -2  20    97.65    46.40   128.10     34 <
  -5  -2  21     8.17    13.20   129.90     34 <
  -4  -3 -24     7.93    73.00   123.10     34 <
  -4  -3 -23     4.01   -10.70   112.10     34 <
  -4  -3 -22     6.72    -4.80   121.50     34 <
  -4  -3 -21    24.12   -21.40   123.30     34 <
  -4  -3 -20     8.58     0.80   112.10     34 <
  -4  -3 -19    25.70   -29.20   126.60     34 <
  -4  -3 -18    86.38     1.80   126.70     34 <
  -4  -3 -17    18.78    91.10   126.80     34 <
  -4  -3 -16   226.27   343.90   142.60     34 <
  -4  -3 -15    27.42    65.40   140.50     34 <
  -4  -3 -14    25.80   -25.40   132.90     34 <
  -4  -2   6    67.77   105.20   132.10     34 <
  -4  -2   7   137.56    89.90   139.10     34 <
  -4  -2   8    49.89    -0.40   124.10     34 <
  -4  -2   9    53.26    -0.60   133.70     34 <
  -4  -1  24     3.79     8.00   128.00     34 <
  -3  -2  -7   885.56   749.10   177.40     34 o
  -3  -2  -6   597.41   470.20   180.70     34 <
  -3  -2  -5   437.84   542.80   184.70     34 <
  -3  -2  -4   901.69   785.50   181.30     34 o
  -3  -1  15    16.51   -38.70   141.40     34 <
  -3  -1  16    14.78    37.90   135.40     34 <
  -3  -1  17   101.36   168.30   135.40     34 <
  -3  -1  18    70.90    11.70   135.50     34 <
  -2  -2 -31     0.74    -4.70   121.40     34 <
  -2  -2 -30     5.72    27.70   125.40     34 <
  -2  -2 -29     9.32    -6.90   126.90     34 <
  -2  -2 -28    62.65   -24.20   123.30     34 <
  -2  -2 -27    10.83   -30.70   126.80     34 <
  -2  -2 -26    14.61   -14.80   125.40     34 <
  -2  -2 -25     4.09    82.20   130.20     34 <
  -2  -2 -24     8.95    44.60   129.10     34 <
  -2  -2 -23    49.88     0.40   122.60     34 <
  -2  -2 -22    10.29    -4.00   125.30     34 <
  -2  -2 -21   122.25    69.80   148.60     34 <
  -2  -2 -20   995.29  1005.10   141.40     34 o
  -2  -2 -19    25.72    -9.90   146.90     34 <
  -2  -1   4   838.52   199.80   344.10     34 <
  -2  -1   5   123.52   -71.30   196.80     34 <
  -2   0  22   137.41    75.30   133.50     34 <
  -2   0  23    61.96   -34.40   130.60     34 <
  -2   0  24   147.59   -18.90   124.40     34 <
  -2   0  25     1.39     3.10   122.60     34 <
  -1  -1 -12   229.75    19.00   152.90     34 <
  -1  -1 -11   101.56    44.80   157.20     34 <
  -1  -1 -10    96.27    77.70   209.10     34 <
  -1  -1  -9  4633.10  4660.20   208.80     34 o
  -1   0  12    72.58   136.60   170.50     34 <
  -1   0  13    52.18   -22.00   142.60     34 <
  -1   0  14   274.39   -49.70   160.00     34 <
   0  -1 -30     4.67    69.60   128.00     34 <
   0  -1 -29     1.17    -6.10   112.10     34 <
   0  -1 -28     6.05    62.20   123.30     34 <
   0  -1 -27    26.96     5.10   128.30     34 <
   0  -1 -26     2.52   -13.00   123.90     34 <
   0  -1 -25     2.38    -0.70   112.10     34 <
   0   1  19    14.44   -25.60   123.70     34 <
   0   1  20   108.50    -3.40   131.00     34 <
   0   1  21   148.97    81.80   132.70     34 <
   0   1  22    33.57    20.10   130.70     34 <
   1   0 -21     2.67    -1.80   112.10     34 <
   1   0 -20    82.52    80.90   133.50     34 <
   1   0 -19    72.03    47.30   149.10     34 <
   1   0 -18   713.04   880.30   146.70     34 o
   1   0 -17     5.91   -14.80   159.90     34 <
   1   0 -16  1318.40   884.40   162.90     34 o
   1   0 -15  1400.90  1145.30   162.90     34 o
   1   0 -14   251.85   -26.60   151.30     34 <
   1   1   8    69.73   -12.70   232.30     34 <
   1   1   9  4425.00  4773.40   203.40     34 o
   1   2  25    18.89   -13.40   129.30     34 <
   2   1  -7   708.88  1672.20   188.70     34 o
   2   1  -6    12.73   202.00   199.20     34 <
   2   1  -5   106.97   -44.60   202.60     34 <
   2   2  15   325.07   233.40   145.10     34 <
   2   2  16   143.47    25.80   138.80     34 <
   2   2  17    24.93    -6.20   126.40     34 <
   2   2  18    60.08   -28.40   124.80     34 <
   3   1 -30     1.36     6.10   127.60     34 <
   3   1 -29     3.20    -0.10   112.10     34 <
   3   1 -28     2.50   -19.90   124.70     34 <
   3   1 -27     7.88    16.50   125.20     34 <
   3   1 -26     7.05    -4.00   112.10     34 <
   3   1 -25    28.11     2.10   126.60     34 <
   3   1 -24    67.07   -26.90   120.20     34 <
   3   1 -23     9.27     0.10   112.10     34 <
   3   1 -22    32.47    15.10   122.80     34 <
   3   1 -21    48.71    -5.90   125.90     34 <
   3   1 -20     5.69     6.10   128.00     34 <
   3   2   2   121.97   217.10   176.90     34 <
   3   2   3   241.23   274.70   181.30     34 <
   3   2   4   818.38   935.00   185.70     34 o
   3   3  21    40.31    43.40   127.40     34 <
   3   3  22    62.91   -13.90   126.60     34 <
   3   3  23     7.20   -10.20   112.10     34 <
   3   3  24    13.86    -1.70   112.10     34 <
   3   3  25     5.58    -6.80   123.20     34 <
   4   2 -17    20.21    94.40   125.30     34 <
   4   2 -16    59.11   -14.60   131.10     34 <
   4   2 -15     5.57    65.60   126.00     34 <
   4   2 -14    11.79   179.30   128.10     34 <
   4   2 -13    37.67    32.20   133.40     34 <
   4   2 -12   133.72   158.50   141.50     34 <
   4   2 -11   125.26   254.80   143.00     34 <
   4   2 -10    85.76   301.70   142.90     34 <
   4   3   9    18.15    -6.70   135.10     34 <
   4   3  10    68.92   -19.50   123.60     34 <
   4   3  11    12.17    -9.80   131.40     34 <
   4   3  12   117.86    14.80   131.60     34 <
   4   3  13   145.36   103.50   130.90     34 <
   5   3  -6    74.56   138.00   135.60     34 <
   5   3  -5    46.19   -14.60   149.10     34 <
   5   3  -4   886.18   841.10   141.90     34 o
   5   3  -3    22.70    67.10   161.20     34 <
   5   3  -2   545.49   820.40   138.80     34 o
   5   3  -1    31.15    14.30   165.60     34 <
   5   4  15    36.24    87.50   129.20     34 <
   5   4  16    84.58   108.10   125.80     34 <
   5   4  17     9.07    -3.30   125.80     34 <
   5   4  18     3.94    -2.30   112.10     34 <
   5   4  19    36.29    55.20   126.10     34 <
   5   4  20    52.35   -14.30   123.20     34 <
   6   3 -25     2.40     3.00   124.20     34 <
   6   3 -24     0.33   -11.30   121.20     34 <
   6   3 -23     0.45   -23.60   119.70     34 <
   6   3 -22     2.33    26.60   122.10     34 <
   6   3 -21     3.63    -0.40   121.20     34 <
   6   3 -20     0.58    16.50   130.80     34 <
   6   3 -19     5.40   -16.50   122.40     34 <
   6   3 -18     6.44     0.30   112.10     34 <
   6   3 -17    23.00    55.00   122.90     34 <
   6   4   2    21.79    19.50   131.20     34 <
   6   4   3    17.20   -23.50   133.70     34 <
   6   4   4   113.84   136.70   131.90     34 <
   6   4   5    57.66     6.60   132.00     34 <
   6   4   6     3.56   -10.70   133.30     34 <
   6   4   7    71.12    70.60   126.20     34 <
   6   5  21     2.86    -0.30   112.10     34 <
   6   5  22     6.56    62.10   129.00     34 <
   6   5  23     0.77   -31.60   126.20     34 <
   6   5  24     0.83   -23.40   124.00     34 <
   6   5  25     1.43   -22.40   126.10     34 <
   7   4 -17     2.74    43.00   122.60     34 <
   7   4 -16    49.95   -13.00   112.10     34 <
   7   4 -15    13.87    32.90   125.10     34 <
   7   4 -14     5.04   -18.20   124.90     34 <
   7   4 -13    19.25   -12.80   126.90     34 <
   7   4 -12     7.24   -30.10   121.60     34 <
   7   4 -11     9.92   -20.30   124.70     34 <
   7   4 -10     1.06    43.50   128.60     34 <
   7   4  -9     6.44   -32.00   125.30     34 <
   7   4  -8    12.15   -12.90   127.80     34 <
   7   5   9    15.56    45.10   129.10     34 <
   7   5  10    10.43   -18.00   132.70     34 <
   7   5  11    55.10   142.30   131.90     34 <
   7   5  12    23.53   -22.90   135.50     34 <
   7   5  13     9.94    28.60   133.00     34 <
   7   5  14   146.34   125.10   133.20     34 <
   7   5  15     1.78   -32.20   128.10     34 <
   8   5  -7    27.86    43.50   134.80     34 <
   8   5  -6    37.38   -26.60   129.90     34 <
   8   5  -5     0.75    81.10   132.70     34 <
   8   5  -4     3.41     9.70   137.10     34 <
   8   5  -3     8.92   178.00   132.20     34 <
   8   5  -2     0.40    36.90   133.20     34 <
   8   5  -1    11.83   -11.80   133.50     34 <
   8   5   1    10.70    30.10   132.10     34 <
   8   6  15     6.61    65.80   138.70     34 <
   8   6  16     7.89    -3.10   132.30     34 <
  -7  -4 -18     8.13    -9.20   136.00     35 <
  -7  -4 -17     3.54    40.90   142.20     35 <
  -7  -4 -16    48.65   168.80   145.40     35 <
  -7  -4 -15     0.73   114.80   140.50     35 <
  -7  -4 -14    12.54   230.60   136.70     35 <
  -7  -4 -13    10.68   131.10   144.60     35 <
  -7  -4 -12     9.73   -17.90   132.80     35 <
  -7  -4 -11     9.95    28.90   137.60     35 <
  -7  -3   4    18.78    -1.80   141.00     35 <
  -7  -3   5     3.92    40.30   143.10     35 <
  -7  -3   6    31.57   182.10   149.30     35 <
  -7  -3   7     4.68   121.00   143.70     35 <
  -7  -3   8    18.92     7.00   142.30     35 <
  -7  -3   9     7.63   -13.00   132.40     35 <
  -7  -2  20    17.83    88.70   131.40     35 <
  -7  -2  21     7.17   -20.50   136.60     35 <
  -7  -2  22     3.22     1.20   135.30     35 <
  -6  -4 -25     2.81   103.20   130.80     35 <
  -6  -4 -24     0.20   -32.80   129.40     35 <
  -6  -4 -23     0.04   -26.00   131.60     35 <
  -6  -4 -22     2.64    53.70   136.20     35 <
  -6  -4 -21     0.43   127.60   131.60     35 <
  -6  -3  -4    17.61    27.40   140.60     35 <
  -6  -3  -3     0.58   162.40   138.10     35 <
  -6  -3  -2    20.23    10.90   146.60     35 <
  -6  -3  -1   108.96   166.30   145.20     35 <
  -6  -2  14    21.76   -25.60   131.10     35 <
  -6  -2  15    37.03   -39.70   134.00     35 <
  -6  -2  16     0.47   -33.90   134.10     35 <
  -6  -2  17     1.39   -26.70   128.40     35 <
  -6  -2  18     0.64    24.80   137.40     35 <
  -5  -3 -15    47.72    -2.30   128.00     35 <
  -5  -3 -14    37.80    34.00   134.90     35 <
  -5  -3 -13     5.68     3.30   146.20     35 <
  -5  -3 -12   441.02   651.20   154.00     35 o
  -5  -3 -11   159.30   318.80   154.00     35 <
  -5  -3 -10    28.22    83.50   150.90     35 <
  -5  -2   6   758.05   445.80   152.70     35 <
  -5  -2   7    89.58    55.20   146.50     35 <
  -5  -2   8     0.31    25.10   152.80     35 <
  -5  -2   9   288.84  1045.30   152.50     35 o
  -5  -2  10    30.83    22.80   162.50     35 <
  -5  -1  22    11.64   -46.20   129.80     35 <
  -5  -1  23    16.16    62.40   127.10     35 <
  -5  -1  24     0.68    10.30   129.40     35 <
  -4  -3 -29     0.09    62.20   126.70     35 <
  -4  -3 -28     0.62    -6.50   124.20     35 <
  -4  -3 -27    13.85    13.50   125.60     35 <
  -4  -3 -26     1.33     7.10   123.20     35 <
  -4  -3 -25     0.04   -16.70   125.20     35 <
  -4  -3 -24     2.15    -2.60   123.60     35 <
  -4  -3 -23     3.41   -24.00   126.80     35 <
  -4  -3 -22     8.19    -8.40   128.10     35 <
  -4  -3 -21    19.60    87.70   126.40     35 <
  -4  -3 -20    12.48    74.10   131.90     35 <
  -4  -2  -2   625.88   488.20   153.50     35 o
  -4  -2  -1   272.74    58.70   173.20     35 <
  -4  -2   0  2056.80  1367.80   167.50     35 o
  -4  -1  15    74.53   -35.70   130.00     35 <
  -4  -1  16     0.80   -37.90   128.10     35 <
  -4  -1  17    68.53   104.60   131.40     35 <
  -4  -1  18     7.86     8.60   135.20     35 <
  -3  -2 -13   168.58   125.70   145.20     35 <
  -3  -2 -12   231.47    -5.40   152.90     35 <
  -3  -2 -11  1077.90  1879.80   163.20     35 o
  -3  -2 -10    24.04   119.00   165.60     35 <
  -3  -2  -9    13.91     8.20   157.70     35 <
  -3  -1   8     1.02   -62.80   169.90     35 <
  -3  -1   9  1414.00  2454.50   184.20     35 o
  -3  -1  10   555.47   991.80   205.60     35 o
  -3   0  23     5.49   -49.20   129.00     35 <
  -3   0  24    22.33   -18.20   129.90     35 <
  -3   0  25     6.32   120.60   128.10     35 <
  -2  -2 -27    12.04    -2.30   112.10     35 <
  -2  -2 -26    13.97    69.60   126.10     35 <
  -2  -2 -25     1.98    38.10   127.80     35 <
  -2  -2 -24     6.15    -7.90   128.00     35 <
  -2  -2 -23    40.34    77.10   126.70     35 <
  -2  -2 -22     0.97    -6.10   112.10     35 <
  -2  -2 -21    77.34    11.80   146.70     35 <
  -2  -2 -20   918.56  1175.90   146.70     35 o
  -2   0  16    79.84    22.70   153.80     35 <
  -2   0  17   262.80   620.80   167.10     35 o
  -2   0  18  1839.60  1722.90   166.90     35 o
  -2   0  19   418.90    78.70   173.10     35 <
  -1  -1 -11    76.61   131.80   173.30     35 <
  -1  -1 -10    16.09   137.00   214.10     35 <
  -1  -1  -9  5142.40  4018.50   211.60     35 o
  -1   0   9  2694.90  4661.30   295.40     35 o
  -1   0  10   974.24  1029.40   234.20     35 o
  -1   1  23     4.72   -32.70   127.50     35 <
  -1   1  24     8.19     0.50   132.90     35 <
  -1   1  25     6.51   -39.10   132.60     35 <
   0  -1 -27   106.27   -19.10   134.70     35 <
   0  -1 -26     2.32   116.90   133.30     35 <
   0  -1 -25     0.31    19.10   137.60     35 <
   0  -1 -24    19.65    82.30   130.60     35 <
   0  -1 -23     1.49    44.30   134.20     35 <
   0  -1 -22    23.91   -14.80   139.20     35 <
   0  -1 -21   284.13   473.40   137.40     35 o
   0  -1 -20   130.60    25.10   147.70     35 <
   0   1  16   829.08   434.60   160.10     35 <
   0   1  17    51.90    24.70   144.60     35 <
   0   1  18    31.28   -21.30   135.80     35 <
   0   1  19     0.49   137.10   133.60     35 <
   1   0 -12    22.79   106.50   170.70     35 <
   1   0 -11   371.42   594.10   187.40     35 o
   1   0 -10  1019.20  1008.60   221.70     35 o
   1   1   8     0.43   149.60   250.60     35 <
   1   1   9  5230.80  5717.80   212.10     35 o
   1   2  23    15.65   -23.20   127.90     35 <
   1   2  24     0.56     9.80   125.50     35 <
   1   2  25    11.20    92.60   129.10     35 <
   2   0 -28     2.84     2.20   124.70     35 <
   2   0 -27     0.60    -0.00   124.60     35 <
   2   0 -26     5.21   -30.80   123.00     35 <
   2   0 -25     0.08     0.70   112.10     35 <
   2   0 -24    49.76   -16.50   123.70     35 <
   2   0 -23   118.91   -11.60   129.20     35 <
   2   0 -22   140.47   108.20   131.80     35 <
   2   0 -21    24.72   103.20   157.50     35 <
   2   0 -20   661.78  1563.60   149.60     35 o
   2   1  -1  5406.20  5699.00   344.00     35 o
   2   2  15   362.43   520.60   152.80     35 o
   2   2  16    95.02    28.60   143.10     35 <
   2   2  17    25.12   -19.10   135.30     35 <
   2   2  18    62.75   133.60   134.80     35 <
   3   1 -14   518.98   412.60   140.00     35 <
   3   1 -13    70.07    25.80   151.80     35 <
   3   1 -12    47.03   226.70   155.00     35 <
   3   1 -11   862.97   978.90   154.90     35 o
   3   1 -10   543.36   -10.60   150.20     35 <
   3   2   7   660.94   643.70   181.30     35 o
   3   2   8   814.25   578.60   165.60     35 o
   3   2   9    13.92    67.50   157.10     35 <
   3   3  22    43.41   -15.40   130.30     35 <
   3   3  23     1.81   -44.80   125.40     35 <
   3   3  24    29.50   -12.10   130.70     35 <
   3   3  25     4.28    34.10   129.70     35 <
   4   1 -30     0.16    24.50   128.50     35 <
   4   1 -29     0.51    38.50   128.50     35 <
   4   1 -28     0.04   -12.60   127.70     35 <
   4   1 -27    12.28    -6.20   129.80     35 <
   4   1 -26     0.05    65.40   124.80     35 <
   4   1 -25     0.97   -12.00   126.50     35 <
   4   1 -24     0.37    25.90   127.10     35 <
   4   1 -23     2.81    -6.00   127.10     35 <
   4   1 -22     2.20    48.10   124.30     35 <
   4   2  -3   184.73     6.80   145.90     35 <
   4   2  -2   816.08   459.20   147.50     35 o
   4   2  -1   239.84    53.80   161.40     35 <
   4   3  14    13.82     3.20   130.10     35 <
   4   3  15    25.86    40.20   147.60     35 <
   4   3  16   251.49   987.30   142.50     35 o
   4   3  17     1.98   -28.60   146.60     35 <
   5   2 -17     2.68   -11.00   140.90     35 <
   5   2 -16   434.16   774.00   140.60     35 o
   5   2 -15     0.27   -23.20   140.60     35 <
   5   2 -14     9.58    35.80   131.40     35 <
   5   2 -13     4.04   -40.80   125.10     35 <
   5   2 -12   390.39    48.00   139.40     35 <
   5   2 -11   360.43    92.60   135.20     35 <
   5   3   5    50.59   -19.00   112.10     35 <
   5   3   6   102.70   154.80   133.00     35 <
   5   3   7     0.27    35.30   139.00     35 <
   5   3   8    69.62   114.40   131.40     35 <
   5   4  20    57.51   -11.90   112.10     35 <
   5   4  21     0.04   -25.90   122.90     35 <
   5   4  22     5.38   -41.40   127.60     35 <
   5   4  23     0.19    20.10   126.30     35 <
   5   4  24     0.73   -18.60   124.20     35 <
   5   4  25     1.05    54.00   129.50     35 <
   6   2 -26     0.36     4.50   126.00     35 <
   6   2 -25     2.32    -3.50   123.60     35 <
   6   2 -24     0.03    23.80   122.40     35 <
   6   2 -23    12.11   -12.80   124.90     35 <
   6   3  -6    21.07   202.30   149.50     35 <
   6   3  -5    38.37    68.30   134.90     35 <
   6   3  -4    13.74    66.40   129.10     35 <
   6   3  -3     0.72   -26.50   131.40     35 <
   6   3  -2    24.55    21.00   131.90     35 <
   6   4  12     9.60    13.30   132.20     35 <
   6   4  13    11.19   -16.90   129.70     35 <
   6   4  14    15.77   -30.90   128.80     35 <
   6   4  15     0.47   -10.00   129.70     35 <
   6   4  16     4.74    94.30   131.90     35 <
   7   3 -21    15.48    54.20   134.90     35 <
   7   3 -20     0.44     7.20   127.10     35 <
   7   3 -19     3.47   -26.60   127.60     35 <
   7   3 -18     2.04    -7.30   128.70     35 <
   7   3 -17     0.81    71.60   131.60     35 <
   7   3 -16     4.00    48.10   130.60     35 <
   7   3 -15     0.52    42.70   134.20     35 <
   7   3 -14    27.82    -0.80   126.40     35 <
   7   3 -13     6.08   -43.80   129.80     35 <
   7   4   2     3.46    -4.70   127.80     35 <
   7   4   3    16.57   -52.10   130.60     35 <
   7   4   4    17.80    50.70   128.50     35 <
   7   4   5     6.32   -33.80   133.50     35 <
   7   4   6    20.34   109.80   135.00     35 <
   7   4   7     2.47    68.60   135.00     35 <
   7   5  18     1.98   -16.70   127.40     35 <
   7   5  19     0.83    93.70   127.50     35 <
   7   5  20     2.11   -30.20   132.80     35 <
   7   5  21     4.42   -18.50   128.70     35 <
   7   5  22    54.12   139.10   133.10     35 <
   8   4 -10     7.14   -11.40   135.50     35 <
   8   4  -9     0.00   108.80   130.40     35 <
   8   4  -8     4.06   -26.70   136.50     35 <
   8   4  -7    10.83   -10.80   136.10     35 <
   8   4  -6     2.93   104.80   132.40     35 <
   8   4  -5     0.25   -45.40   132.30     35 <
   8   4  -4     7.82   -25.20   128.30     35 <
   8   5   9     1.22    37.20   139.00     35 <
   8   5  10     0.49   -17.60   137.10     35 <
   8   5  11     0.02   159.00   136.20     35 <
   8   5  12     0.70   153.30   145.80     35 <
   8   5  13     7.91    90.40   134.50     35 <
   8   5  14     2.51   -16.70   138.20     35 <
  -7  -4  -9     4.26   -22.40   129.20     36 <
  -7  -4  -8     9.67    18.20   132.50     36 <
  -7  -4  -7     1.23   -17.80   129.20     36 <
  -7  -4  -6    16.05    -0.10   112.10     36 <
  -7  -4  -5     6.55    -8.40   131.60     36 <
  -7  -4  -4    23.42    71.30   128.60     36 <
  -7  -3   8    21.51    25.70   131.70     36 <
  -7  -3   9     5.38   -49.20   132.10     36 <
  -7  -3  10     9.16    30.50   136.60     36 <
  -7  -3  11     7.83   -20.00   134.60     36 <
  -7  -3  12    35.30    32.00   134.40     36 <
  -7  -2  22     3.61   -24.10   128.60     36 <
  -6  -4 -20    22.35    12.40   128.60     36 <
  -6  -4 -19     1.45    -9.60   128.20     36 <
  -6  -4 -18     0.81   -12.60   125.80     36 <
  -6  -4 -17     0.99     0.20   112.10     36 <
  -6  -4 -16     5.36   112.20   126.00     36 <
  -6  -4 -15     2.13   -22.80   128.60     36 <
  -6  -4 -14    17.49    62.90   124.40     36 <
  -6  -3   1    91.29   267.90   131.80     36 <
  -6  -3   2    33.66   -20.20   136.10     36 <
  -6  -3   3     7.10   125.20   129.80     36 <
  -6  -3   4    23.98   108.50   137.30     36 <
  -6  -2  16     0.93   -15.10   128.70     36 <
  -6  -2  17     4.34   103.00   126.70     36 <
  -6  -2  18     2.15   -25.50   123.30     36 <
  -6  -2  19     4.29    54.80   124.00     36 <
  -5  -4 -28     1.30    59.50   125.80     36 <
  -5  -4 -27     0.80   -23.50   119.00     36 <
  -5  -4 -26     2.20    -7.00   112.10     36 <
  -5  -4 -25     3.36   -14.50   124.10     36 <
  -5  -4 -24     0.65   -28.90   121.50     36 <
  -5  -3  -8    59.10     0.10   112.10     36 <
  -5  -3  -7     1.57   155.20   127.90     36 <
  -5  -3  -6    84.42    30.60   135.50     36 <
  -5  -3  -5    40.93    21.10   154.00     36 <
  -5  -2   9   182.30   397.00   135.10     36 <
  -5  -2  10    14.39    -7.80   147.40     36 <
  -5  -2  11   269.49   292.80   150.70     36 <
  -5  -2  12   364.99   637.40   154.10     36 o
  -5  -1  22    12.88    -0.60   122.80     36 <
  -5  -1  23    16.26    15.70   127.80     36 <
  -5  -1  24     1.00    -2.80   126.60     36 <
  -4  -3 -19    24.98   -13.80   126.80     36 <
  -4  -3 -18    69.75    89.80   126.00     36 <
  -4  -3 -17    12.96   -12.80   129.60     36 <
  -4  -3 -16   223.82    57.50   123.60     36 <
  -4  -3 -15    22.44   -21.10   126.70     36 <
  -4  -3 -14    13.12   -10.60   135.70     36 <
  -4  -2   1   264.78   208.30   188.90     36 <
  -4  -2   2   651.59   875.30   156.30     36 o
  -4  -2   3   199.92   -29.90   152.50     36 <
  -4  -1  16     3.54    23.90   131.20     36 <
  -4  -1  17    74.94    -6.90   125.50     36 <
  -4  -1  18     5.08   -21.20   124.50     36 <
  -4  -1  19    18.51   -25.30   124.10     36 <
  -3  -3 -31     6.40    -9.20   122.50     36 <
  -3  -3 -30     0.46     2.80   125.20     36 <
  -3  -3 -29     1.78     1.90   125.30     36 <
  -3  -3 -28     2.28    55.80   125.60     36 <
  -3  -3 -27     7.86    54.70   124.30     36 <
  -3  -3 -26     3.74     2.20   126.60     36 <
  -3  -3 -25     3.06    -1.30   112.10     36 <
  -3  -2  -8   527.48   800.40   158.10     36 o
  -3  -2  -7   729.90   475.00   169.10     36 <
  -3  -2  -6   547.41   236.40   168.40     36 <
  -3  -1   9  1186.40  1076.20   165.40     36 o
  -3  -1  10   552.34   700.40   181.90     36 o
  -3  -1  11   901.59  1554.30   172.90     36 o
  -3   0  22     5.71    49.00   122.10     36 <
  -3   0  23     5.78   -16.00   127.80     36 <
  -3   0  24    35.13    80.80   129.10     36 <
  -3   0  25    15.03    74.80   121.90     36 <
  -2  -2 -20   764.94   799.70   142.60     36 o
  -2  -2 -19    12.47    -0.10   112.10     36 <
  -2  -2 -18    84.54   127.40   126.40     36 <
  -2  -2 -17    23.10   -22.70   135.50     36 <
  -2  -2 -16   103.54   119.30   138.40     36 <
  -2  -1   1  6928.80  9587.30   344.50     36 o
  -2  -1   2 13563.00 12654.40   374.90     36 o
  -2   0  16    64.12    67.70   164.80     36 <
  -2   0  17   243.15   248.20   168.30     36 <
  -2   0  18  1591.70  1878.90   163.60     36 o
  -1  -2 -30     1.05    -0.00   112.10     36 <
  -1  -2 -29     6.59   -18.10   118.60     36 <
  -1  -2 -28     7.58    24.10   123.30     36 <
  -1  -2 -27     2.06    -6.50   112.10     36 <
  -1  -2 -26     1.99   -13.90   119.10     36 <
  -1  -1  -9  4964.90  5569.90   208.80     36 o
  -1  -1  -8    40.69   -55.60   235.00     36 <
  -1   0   8 21647.00 21610.80   350.10     36 o
  -1   0   9  2579.60  2549.30   358.40     36 o
  -1   1  22    29.56    53.10   128.60     36 <
  -1   1  23     5.53    -0.30   127.70     36 <
  -1   1  24    27.02   -24.20   123.90     36 <
  -1   1  25     8.12    -1.50   112.10     36 <
   0  -1 -22    25.91   124.90   133.00     36 <
   0  -1 -21   264.86   132.60   132.90     36 <
   0  -1 -20    94.88    43.80   128.10     36 <
   0  -1 -19     5.23   -21.50   124.90     36 <
   0  -1 -18    33.97   -17.10   130.60     36 <
   0  -1 -17    97.61   102.10   145.10     36 <
   0   1  15   782.93   878.70   152.70     36 o
   0   1  16   719.30   258.70   155.70     36 <
   1  -1 -30     0.68    32.40   126.10     36 <
   1  -1 -29    10.71   -13.40   124.80     36 <
   1  -1 -28     2.99    35.90   125.40     36 <
   1   0 -11   312.19   450.80   182.80     36 <
   1   0 -10  1139.00  1116.30   221.50     36 o
   1   0  -9  2766.90  2846.20   372.90     36 o
   1   1   7  1516.00  1105.50   261.40     36 o
   1   1   8    42.84   153.70   262.20     36 <
   1   2  20    20.41    -1.50   124.60     36 <
   1   2  21    11.56     1.80   119.60     36 <
   1   2  22     9.20    28.60   129.80     36 <
   1   2  23     8.14    42.20   130.00     36 <
   2   0 -25     0.57   -15.50   118.50     36 <
   2   0 -24    57.35    -8.80   121.60     36 <
   2   0 -23   115.80    61.50   123.80     36 <
   2   0 -22   130.85   185.90   126.40     36 <
   2   0 -21    18.24     3.30   143.70     36 <
   2   0 -20   495.44   589.40   140.70     36 o
   2   0 -19   330.95    38.30   163.20     36 <
   2   1  -2 11837.00  9458.80   442.10     36 o
   2   2  13   922.06   836.70   164.40     36 o
   2   2  14   286.63   178.00   159.90     36 <
   2   2  15   336.33   391.90   142.50     36 <
   3   1 -14   454.13   498.30   132.80     36 o
   3   1 -13    59.18   -16.60   137.00     36 <
   3   1 -12    65.11    12.30   147.30     36 <
   3   1 -11   831.71  1281.10   163.40     36 o
   3   2   5   462.59   262.50   164.90     36 <
   3   2   6   559.28   134.00   171.30     36 <
   3   3  19   106.08    80.30   128.20     36 <
   3   3  20     6.77    -7.20   126.20     36 <
   3   3  21    80.73   118.10   127.20     36 <
   4   1 -30     0.71    36.60   120.70     36 <
   4   1 -29     0.59   -13.20   124.30     36 <
   4   1 -28     0.32     0.30   122.40     36 <
   4   1 -27    12.99    80.80   125.50     36 <
   4   1 -26     1.65    22.00   125.70     36 <
   4   1 -25     2.52    -3.10   112.10     36 <
   4   1 -24     1.97    19.90   121.00     36 <
   4   1 -23     3.00    55.60   122.30     36 <
   4   1 -22    15.81    44.20   120.50     36 <
   4   2  -6    67.08    -6.80   129.20     36 <
   4   2  -5    51.95   117.30   129.00     36 <
   4   2  -4   232.60     9.50   131.90     36 <
   4   2  -3   220.85    92.60   155.20     36 <
   4   3  11     3.11   -22.80   132.50     36 <
   4   3  12    95.81   126.90   128.00     36 <
   4   3  13   158.23   227.00   135.20     36 <
   4   4  24     3.34    -4.30   122.70     36 <
   4   4  25     3.01    48.40   124.50     36 <
   5   2 -19    79.65    -3.60   112.10     36 <
   5   2 -18    14.96    -1.90   118.20     36 <
   5   2 -17     2.54    -8.40   119.60     36 <
   5   2 -16   307.22   160.10   128.60     36 <
   5   2 -15     2.85   -22.60   133.90     36 <
   5   2 -14     6.97     0.90   126.10     36 <
   5   2 -13     6.66    63.80   137.80     36 <
   5   3   1    31.88     9.60   161.50     36 <
   5   3   2   457.38   391.00   137.50     36 <
   5   3   3    13.52    -4.80   153.00     36 <
   5   3   4   807.65   893.60   140.50     36 o
   5   4  16    60.69   178.40   126.80     36 <
   5   4  17     3.00    15.80   133.40     36 <
   5   4  18     8.32     5.70   125.10     36 <
   5   4  19    37.22    -0.40   112.10     36 <
   6   2 -26     0.35    -2.30   112.10     36 <
   6   2 -25     1.75    -6.00   120.70     36 <
   6   3 -10     2.41   -20.90   118.90     36 <
   6   3  -9    18.67    -1.00   123.20     36 <
   6   3  -8     1.75   -19.10   129.60     36 <
   6   3  -7   149.59   233.40   129.90     36 <
   6   3  -6    28.47    87.60   141.30     36 <
   6   4   7    59.47   142.50   126.80     36 <
   6   4   8    10.57    -5.50   112.10     36 <
   6   4   9    22.63    -8.60   123.20     36 <
   6   4  10    54.38    -3.20   112.10     36 <
   6   4  11     3.21    72.40   125.60     36 <
   6   5  21     1.22   -20.60   123.50     36 <
   6   5  22     7.51    17.20   123.20     36 <
   6   5  23     0.24    21.60   123.80     36 <
   6   5  24     0.68     0.90   112.10     36 <
   6   5  25     0.13     4.30   122.30     36 <
   7   3 -22    14.47     0.20   112.10     36 <
   7   3 -21    11.48     7.90   118.80     36 <
   7   3 -20     0.92   -16.80   126.60     36 <
   7   3 -19     1.34     0.20   112.10     36 <
   7   3 -18     5.95    29.10   123.60     36 <
   7   3 -17     1.76    42.40   128.90     36 <
   7   4  -3    32.63   -14.30   119.50     36 <
   7   4  -2     3.39   -19.60   122.20     36 <
   7   4  -1    12.55   -19.50   125.70     36 <
   7   4   1    19.74    -1.40   112.10     36 <
   7   5  13    19.88   -27.20   126.60     36 <
   7   5  14    87.36   166.40   129.70     36 <
   7   5  15     1.54   -15.40   131.30     36 <
   7   5  16    11.63     2.80   121.60     36 <
   7   5  17    22.48   -13.90   124.10     36 <
   8   4 -15     6.67    -5.10   125.90     36 <
   8   4 -14     1.97    46.50   128.20     36 <
   8   4 -13     0.86    47.70   128.40     36 <
   8   4 -12     0.55   -17.90   126.70     36 <
   8   4 -11     2.06   145.30   132.30     36 <
   8   4 -10    10.66    55.60   130.40     36 <
   8   4  -9     1.38    98.90   130.30     36 <
   8   5   3     1.08    62.00   128.30     36 <
   8   5   4     4.25   -28.50   129.90     36 <
   8   5   5     1.31   -20.40   133.80     36 <
   8   5   6    36.58   136.10   137.10     36 <
   8   5   7    27.00    -2.20   112.10     36 <
   8   5   8     1.31    55.70   128.60     36 <
  -7  -4 -13    10.66   -11.40   130.30     37 <
  -7  -4 -12     9.96    46.00   129.70     37 <
  -7  -4 -11     8.95   -15.10   135.30     37 <
  -7  -4 -10     1.72    96.60   132.00     37 <
  -7  -4  -9     2.36   -19.00   139.30     37 <
  -7  -4  -8    11.77   123.00   141.70     37 <
  -7  -3   3     0.27    33.20   137.50     37 <
  -7  -3   4    16.32   -50.60   135.60     37 <
  -7  -3   5     5.84    -4.10   127.10     37 <
  -7  -3   6    33.58    87.90   138.50     37 <
  -7  -3   7     5.16   109.10   132.50     37 <
  -7  -2  17     8.83    81.60   134.50     37 <
  -7  -2  18     0.97    -9.30   139.20     37 <
  -7  -2  19    28.25   -30.40   137.50     37 <
  -7  -2  20    15.35   -33.80   129.80     37 <
  -6  -4 -21     0.36   -32.10   126.30     37 <
  -6  -4 -20    18.03    11.60   133.60     37 <
  -6  -4 -19     1.00    50.50   126.40     37 <
  -6  -4 -18     0.24   -32.10   124.10     37 <
  -6  -4 -17     0.75    -3.60   120.90     37 <
  -6  -4 -16     4.84    -0.50   112.10     37 <
  -6  -3  -3     4.99    16.50   135.30     37 <
  -6  -3  -2    21.14    19.30   134.60     37 <
  -6  -3  -1    84.56    81.40   130.90     37 <
  -6  -2  11    60.11    27.40   135.80     37 <
  -6  -2  12     1.09   156.10   138.10     37 <
  -6  -2  13    13.31    32.00   135.90     37 <
  -6  -2  14    21.17   100.30   137.50     37 <
  -6  -1  23     0.77    72.20   130.10     37 <
  -6  -1  24     0.20    37.50   130.90     37 <
  -5  -4 -28     0.94    -4.90   123.50     37 <
  -5  -4 -27     0.76    14.60   126.10     37 <
  -5  -4 -26     2.01    51.40   130.40     37 <
  -5  -4 -25     0.82   -24.00   126.50     37 <
  -5  -4 -24     0.64   -12.60   124.60     37 <
  -5  -3 -10    19.11   111.30   132.10     37 <
  -5  -3  -9    39.17    12.40   136.10     37 <
  -5  -3  -8    58.95    65.50   129.00     37 <
  -5  -3  -7     0.25   -32.60   137.80     37 <
  -5  -2   5   871.53   845.00   179.80     37 o
  -5  -2   6   638.30   643.60   163.10     37 o
  -5  -2   7    72.42    50.80   145.00     37 <
  -5  -1  18    52.18    77.00   133.50     37 <
  -5  -1  19    33.16    43.60   128.00     37 <
  -5  -1  20    13.77    -1.70   127.30     37 <
  -5  -1  21     3.38    48.20   134.60     37 <
  -4  -3 -19    25.87   114.20   131.20     37 <
  -4  -3 -18    71.24    -5.60   112.10     37 <
  -4  -3 -17     1.16    -0.50   132.20     37 <
  -4  -3 -16   238.36   172.30   138.10     37 <
  -4  -3 -15    27.54   117.50   138.10     37 <
  -4  -2  -1   245.02   298.50   185.50     37 <
  -4  -2   0  1775.30  2037.30   158.10     37 o
  -4  -1  12     2.43   -16.40   131.10     37 <
  -4  -1  13    53.58   -38.70   125.40     37 <
  -4  -1  14    23.10   -32.20   133.10     37 <
  -4  -1  15    71.67    97.60   129.10     37 <
  -4   0  24     1.47    14.70   126.90     37 <
  -3  -3 -30     0.58     2.30   122.50     37 <
  -3  -3 -29     0.51   -13.90   121.80     37 <
  -3  -3 -28     1.51    -0.20   112.10     37 <
  -3  -3 -27     5.93   161.50   130.10     37 <
  -3  -3 -26     2.28   -15.70   119.00     37 <
  -3  -3 -25     3.08     5.10   125.90     37 <
  -3  -3 -24    31.06    28.10   126.90     37 <
  -3  -3 -23     2.61   -20.90   125.40     37 <
  -3  -2  -9    13.24    75.10   153.10     37 <
  -3  -2  -8   599.27   546.50   158.10     37 o
  -3  -2  -7   704.16   428.60   173.40     37 <
  -3  -1   6    55.16   139.10   166.60     37 <
  -3  -1   7    35.85   564.60   155.60     37 o
  -3  -1   8     2.47   -18.80   173.00     37 <
  -3   0  19     5.91    20.90   145.00     37 <
  -3   0  20     6.56   -33.70   123.40     37 <
  -3   0  21    69.14   -15.30   131.00     37 <
  -2  -2 -18    69.15    82.40   130.30     37 <
  -2  -2 -17    23.80    -8.00   132.20     37 <
  -2  -2 -16    75.17    26.40   142.40     37 <
  -2  -2 -15   381.74   386.80   149.70     37 <
  -2   0  13    59.69    88.30   142.30     37 <
  -2   0  14     8.86    44.10   159.00     37 <
  -2   0  15  1542.40  1443.60   157.20     37 o
  -1  -2 -29     5.28    53.40   126.40     37 <
  -1  -2 -28     4.56    -2.50   112.10     37 <
  -1  -2 -27     1.69   -17.00   121.80     37 <
  -1  -2 -26     2.56     6.20   119.50     37 <
  -1  -2 -25    11.72    38.20   126.00     37 <
  -1  -2 -24     1.71    -7.00   123.50     37 <
  -1  -2 -23    13.67   -17.20   123.10     37 <
  -1  -1  -8     4.22   -59.20   249.70     37 <
  -1  -1  -7  1841.60  2188.10   248.20     37 o
  -1   0   7   260.33   -94.90   350.00     37 <
  -1   1  19   188.85   159.10   134.40     37 <
  -1   1  20    56.28    20.70   134.40     37 <
  -1   1  21     1.98   143.20   133.70     37 <
   0  -1 -18    25.55   -12.60   134.00     37 <
   0  -1 -17    71.01    83.10   145.50     37 <
   0  -1 -16   704.04   747.10   161.90     37 o
   0  -1 -15   730.13   702.60   163.60     37 o
   0   1  13   699.88   585.30   154.10     37 o
   0   1  14   231.73   112.60   166.10     37 <
   0   1  15   791.95  1082.60   173.40     37 o
   0   2  25    16.36    74.10   127.80     37 <
   1  -1 -29     5.95    -4.00   112.10     37 <
   1  -1 -28     2.18    12.00   126.30     37 <
   1  -1 -27     1.34   -11.20   112.10     37 <
   1  -1 -26     1.57   -17.70   124.60     37 <
   1  -1 -25     6.62    25.10   125.80     37 <
   1  -1 -24    13.84   -34.10   121.30     37 <
   1   0  -8 23926.00 24029.80   344.50     37 o
   1   1   7  1906.40  1418.60   257.30     37 o
   1   2  19    11.31   228.10   132.10     37 <
   1   2  20    14.20   -12.50   135.70     37 <
   1   2  21     4.81    -9.60   112.10     37 <
   2   0 -19   403.15   160.90   166.90     37 <
   2   0 -18  1553.00  1378.20   154.90     37 o
   2   0 -17   241.90   266.80   154.90     37 <
   2   0 -16    52.22    -7.70   158.40     37 <
   2   0 -15  1637.40  1727.10   152.50     37 o
   2   1  -1  7452.70  7622.30   344.70     37 o
   2   2  13   926.08  1080.60   166.10     37 o
   2   2  14   326.53   187.40   165.10     37 <
   2   3  24     9.32    36.10   128.10     37 <
   2   3  25     0.71   -25.60   129.40     37 <
   3   0 -30    27.50   -11.60   126.90     37 <
   3   0 -29    14.95    54.40   126.40     37 <
   3   0 -28    11.30    28.30   126.40     37 <
   3   0 -27     2.96   -21.10   125.80     37 <
   3   0 -26   142.99    31.60   121.20     37 <
   3   0 -25    10.92    91.20   125.90     37 <
   3   0 -24    23.63   -14.80   123.30     37 <
   3   1 -10   606.73   540.80   185.20     37 <
   3   1  -9  1030.60  1088.80   165.80     37 o
   3   1  -8     2.30   -30.90   157.90     37 <
   3   2   6   526.89   561.10   178.60     37 o
   3   2   7   719.91   356.00   175.80     37 <
   3   3  18    11.43    23.70   134.70     37 <
   3   3  19    96.18    83.90   132.10     37 <
   3   3  20     6.80    85.90   132.10     37 <
   3   3  21    88.17   -15.20   128.30     37 <
   4   1 -20    12.49    14.60   127.50     37 <
   4   1 -19    14.89    69.90   128.70     37 <
   4   1 -18     3.62   -35.80   132.40     37 <
   4   1 -17    60.64   143.10   126.40     37 <
   4   1 -16     5.12     1.60   132.30     37 <
   4   2  -2   636.45   668.40   149.90     37 o
   4   2  -1   246.62    15.90   174.60     37 <
   4   3  11     3.72    31.60   138.70     37 <
   4   3  12   131.49    65.80   135.80     37 <
   4   3  13   147.47   196.00   136.10     37 <
   4   3  14    17.01    -4.30   125.10     37 <
   4   4  23    19.97   -31.10   121.30     37 <
   4   4  24     0.96   -26.20   122.50     37 <
   4   4  25     4.11     9.80   120.70     37 <
   5   1 -28     0.99   -20.00   119.40     37 <
   5   1 -27     2.64    11.10   125.40     37 <
   5   1 -26     2.30    -7.20   123.00     37 <
   5   1 -25     3.93    30.10   121.00     37 <
   5   2 -12   374.29   443.50   136.50     37 o
   5   2 -11   283.02   142.30   144.60     37 <
   5   2 -10    22.21    -8.80   138.60     37 <
   5   2  -9   220.36   123.80   128.60     37 <
   5   3   4   787.14   787.30   146.10     37 o
   5   3   5    36.68    16.60   147.50     37 <
   5   3   6   100.81   103.10   136.20     37 <
   5   4  17     3.24   -15.60   125.10     37 <
   5   4  18    11.06    41.70   122.60     37 <
   5   4  19    36.79   -19.50   119.90     37 <
   5   4  20    46.21   -28.90   121.60     37 <
   6   2 -23     9.91    22.40   128.10     37 <
   6   2 -22     4.12    -1.40   112.10     37 <
   6   2 -21     0.94    23.60   121.40     37 <
   6   2 -20     0.49   -14.80   124.80     37 <
   6   2 -19     2.79    88.10   123.60     37 <
   6   2 -18     0.95    -8.90   125.60     37 <
   6   2 -17     4.00    -5.80   119.20     37 <
   6   3  -5    37.08   -29.20   131.50     37 <
   6   3  -4    13.24    97.40   131.80     37 <
   6   3  -3     3.89    91.70   133.10     37 <
   6   3  -2    23.57     9.90   133.10     37 <
   6   4  10    48.26   -27.00   127.10     37 <
   6   4  11     0.96   -26.50   131.90     37 <
   6   4  12     8.13    98.50   126.70     37 <
   6   4  13    11.07    -2.90   130.50     37 <
   6   5  22     5.95     9.50   121.10     37 <
   6   5  23     0.12   -24.10   123.20     37 <
   6   5  24     0.11   -25.90   125.30     37 <
   6   5  25     0.09     5.90   124.90     37 <
   7   3 -15     1.05   -25.80   124.80     37 <
   7   3 -14    22.57   -16.60   125.20     37 <
   7   3 -13     3.83    12.50   127.50     37 <
   7   3 -12    26.66    30.90   130.60     37 <
   7   3 -11    10.90   106.20   127.50     37 <
   7   3 -10    10.28    18.10   130.00     37 <
   7   4   2     5.72   -38.80   126.10     37 <
   7   4   3    17.43   -25.50   127.90     37 <
   7   4   4    18.33   -12.80   123.60     37 <
   7   4   5     6.17    -6.80   123.00     37 <
   7   5  15     1.22   -24.50   122.70     37 <
   7   5  16    10.61    -0.70   126.20     37 <
   7   5  17    19.07    73.20   124.60     37 <
   7   5  18     1.95    -5.00   112.10     37 <
   7   5  19     1.58   -14.40   127.00     37 <
   8   4  -8     4.59    52.80   137.50     37 <
   8   4  -7     9.86   127.70   138.20     37 <
   8   4  -6     2.84   112.70   134.70     37 <
   8   4  -5     0.47   -47.20   126.90     37 <
   8   4  -4     6.50   -15.80   134.70     37 <
   8   4  -3     6.35    -0.40   130.90     37 <
   8   5   7    34.63    76.20   135.70     37 <
   8   5   8     0.36   -21.90   137.50     37 <
   8   5   9     1.17   114.30   133.30     37 <
   8   5  10     0.60     7.20   133.60     37 <
   8   5  11     0.03   -41.30   136.10     37 <
  -7  -4 -22     5.70    31.90   138.40     39 <
  -7  -4 -21     1.09    29.50   139.50     39 <
  -7  -4 -20     4.34   -35.00   134.60     39 <
  -7  -4 -19    12.73    44.30   135.20     39 <
  -7  -4 -18    12.51   -26.50   133.90     39 <
  -7  -3  -8     6.78    -0.30   112.10     39 <
  -7  -3  -7    14.96    84.60   133.20     39 <
  -7  -3  -6    45.79     9.70   133.20     39 <
  -7  -3  -5    65.18    74.50   138.70     39 <
  -7  -2   5    63.53   -34.00   127.80     39 <
  -7  -2   6    73.98   -58.30   138.40     39 <
  -7  -2   7    16.39    57.80   140.10     39 <
  -7  -2   8    68.09   148.10   135.30     39 <
  -7  -1  17    17.60   -32.90   133.10     39 <
  -7  -1  18     1.42   -40.10   129.50     39 <
  -7  -1  19     5.89   147.00   140.90     39 <
  -7  -1  20     2.79   -39.20   134.70     39 <
  -6  -4 -25     3.11   -26.70   121.90     39 <
  -6  -4 -24     5.42   -13.80   126.50     39 <
  -6  -3 -13     8.52   -38.50   127.90     39 <
  -6  -3 -12     5.29   -33.40   127.30     39 <
  -6  -3 -11    14.21    -0.40   112.10     39 <
  -6  -3 -10    13.10    78.30   135.10     39 <
  -6  -3  -9    45.14   113.70   134.60     39 <
  -6  -2   1   168.82    -4.30   134.00     39 <
  -6  -2   2    31.05   -14.30   112.10     39 <
  -6  -2   3   102.67    -7.60   136.90     39 <
  -6  -2   4    99.19   210.90   142.60     39 <
  -6  -1  13    36.49   -24.30   127.90     39 <
  -6  -1  14     9.59    57.90   133.90     39 <
  -6  -1  15    21.87   -41.40   127.20     39 <
  -6  -1  16    21.83   -14.70   127.10     39 <
  -6   0  24     2.29    70.30   136.40     39 <
  -5  -3 -18    44.62   -26.00   125.00     39 <
  -5  -3 -17    42.32    11.40   129.00     39 <
  -5  -3 -16    43.65    69.90   130.40     39 <
  -5  -3 -15    42.10    59.90   133.00     39 <
  -5  -3 -14    26.70   -14.10   130.00     39 <
  -5  -2  -3    44.85   -29.50   149.50     39 <
  -5  -2  -2   454.07   210.00   157.40     39 <
  -5  -2  -1   273.02  1286.80   147.40     39 o
  -5  -1   9   251.46   235.70   137.10     39 <
  -5  -1  10    47.23    24.20   126.80     39 <
  -5  -1  11    93.65   -17.00   139.40     39 <
  -5   0  20    16.35    96.80   128.60     39 <
  -5   0  21    10.98   -19.80   130.30     39 <
  -5   0  22     3.09    13.70   127.20     39 <
  -5   0  23    25.66    78.70   126.50     39 <
  -4  -3 -24    12.52    -4.00   112.10     39 <
  -4  -3 -23    11.75   -19.90   123.30     39 <
  -4  -3 -22     4.60    -1.60   112.10     39 <
  -4  -3 -21    40.11    -4.80   124.70     39 <
  -4  -3 -20    16.98   -13.90   120.30     39 <
  -4  -2  -8    54.89    -7.00   129.30     39 <
  -4  -2  -7   222.01    -5.80   133.00     39 <
  -4  -2  -6   107.04    74.30   137.30     39 <
  -4  -1   6  1422.10  3008.20   176.80     39 o
  -4  -1   7    51.57   135.80   180.00     39 <
  -4   0  17   104.49   116.70   130.50     39 <
  -4   0  18    60.79   -33.70   132.70     39 <
  -4   0  19    12.38   -27.60   129.60     39 <
  -3  -3 -30     1.76    11.60   123.10     39 <
  -3  -3 -29     2.10   -18.60   126.90     39 <
  -3  -3 -28     3.52    12.80   128.10     39 <
  -3  -3 -27     9.60   -24.30   124.00     39 <
  -3  -3 -26    13.32     2.30   127.80     39 <
  -3  -3 -25     2.06   -19.50   125.70     39 <
  -3  -2 -13   260.21    87.80   133.10     39 <
  -3  -2 -12   214.21    13.80   152.90     39 <
  -3  -2 -11  1597.00  1941.00   152.80     39 o
  -3  -1   1  2345.00  2024.00   183.50     39 o
  -3  -1   2   341.73   278.70   189.20     39 <
  -3   0  13   361.15   364.10   158.10     39 <
  -3   0  14   164.00   250.40   148.80     39 <
  -3   1  23    13.25     3.70   126.40     39 <
  -3   1  24    52.17   -35.60   124.00     39 <
  -2  -3 -31     4.21    -0.80   112.10     39 <
  -2  -2 -19    71.38    -3.20   112.10     39 <
  -2  -2 -18    91.70   114.60   131.60     39 <
  -2  -2 -17    43.76    22.80   133.40     39 <
  -2  -2 -16   145.55    52.50   139.70     39 <
  -2  -1  -3 10148.00 13075.90   354.60     39 o
  -2   0   9    53.67   114.60   187.80     39 <
  -2   0  10  2738.50  1898.90   178.80     39 o
  -2   1  20    64.15     6.40   137.00     39 <
  -2   1  21     9.09    94.10   127.60     39 <
  -2   1  22    93.86   -23.40   128.70     39 <
  -1  -2 -25    48.04    -2.90   127.40     39 <
  -1  -2 -24     3.77    37.40   125.90     39 <
  -1  -2 -23     8.09    -0.40   126.50     39 <
  -1  -2 -22    17.87   -13.20   112.10     39 <
  -1  -2 -21    25.33   -24.10   127.90     39 <
  -1  -1  -8   100.90    40.30   223.70     39 <
  -1   0   5   476.17    29.80   238.10     39 <
  -1   1  16    51.84    66.80   128.80     39 <
  -1   1  17    48.28    17.50   131.40     39 <
   0  -2 -30     2.65    26.10   126.10     39 <
   0  -2 -29    18.61    -8.90   128.20     39 <
   0  -2 -28    70.71    56.00   128.70     39 <
   0  -2 -27     4.96    -7.00   125.90     39 <
   0  -1 -14   288.32    59.10   163.60     39 <
   0  -1 -13   614.96   203.20   150.60     39 <
   0   1  12    97.83    -1.80   157.90     39 <
   0   1  13   602.01   909.00   147.70     39 o
   0   2  22    48.33    16.00   136.30     39 <
   0   2  23   265.14   -16.60   127.80     39 <
   0   2  24    13.75    -7.10   126.10     39 <
   1  -1 -21     9.56     0.70   128.60     39 <
   1  -1 -20    68.05   143.50   128.70     39 <
   1  -1 -19   129.68    45.60   139.80     39 <
   1  -1 -18    78.81    85.80   137.30     39 <
   1   0  -5   530.62  -100.00   225.60     39 <
   1   1   7  2890.90  1611.80   247.90     39 o
   1   1   8   176.65   138.90   215.50     39 <
   1   2  18    49.55    11.90   131.10     39 <
   1   2  19    33.01   -20.50   129.20     39 <
   1   2  20    16.63    59.80   125.00     39 <
   2  -1 -29     5.20    -2.60   112.10     39 <
   2  -1 -28     4.89    60.20   127.70     39 <
   2  -1 -27     3.39    44.10   126.80     39 <
   2  -1 -26    23.48    -2.00   123.40     39 <
   2  -1 -25    14.02    -3.20   112.10     39 <
   2  -1 -24    56.78   -23.40   127.30     39 <
   2   0 -11    72.15    28.00   179.00     39 <
   2   0 -10  2511.60  3001.10   183.60     39 o
   2   1   2 11708.00 18562.20   394.90     39 o
   2   1   3  9759.50  4518.20   364.60     39 o
   2   2  14   355.97   359.90   169.80     39 <
   2   2  15   514.34   312.70   148.60     39 <
   2   3  24     7.22     4.50   128.00     39 <
   2   3  25     2.11    60.20   127.50     39 <
   3  -1 -30     3.09   -15.80   121.90     39 <
   3   0 -18   643.12   604.00   140.60     39 o
   3   0 -17     4.04   -12.40   144.10     39 <
   3   0 -16    58.60   110.10   133.10     39 <
   3   0 -15   125.64    67.90   137.10     39 <
   3   1  -3    71.17    13.50   161.70     39 <
   3   1  -2   383.07    46.00   173.30     39 <
   3   2   9    89.38    47.20   146.80     39 <
   3   2  10    56.81    20.40   142.20     39 <
   3   3  20    10.84   -19.40   127.40     39 <
   3   3  21   111.69   -26.70   127.30     39 <
   3   3  22    29.34    -0.10   122.50     39 <
   4   0 -26    54.70   -15.30   121.50     39 <
   4   0 -25     0.96    -9.10   121.70     39 <
   4   0 -24     1.35    -1.60   112.10     39 <
   4   0 -23     3.20   -18.60   127.50     39 <
   4   0 -22     7.98    43.50   125.20     39 <
   4   0 -21    22.43   -25.70   139.30     39 <
   4   1  -9    25.25    10.80   139.20     39 <
   4   1  -8   222.00   705.90   141.40     39 o
   4   2   4   281.94    32.10   135.00     39 <
   4   2   5    64.11   -42.90   129.70     39 <
   4   3  15    71.84   143.90   140.90     39 <
   4   3  16   415.21   215.30   135.10     39 <
   4   3  17    22.00    37.60   135.20     39 <
   5   0 -28     9.07     0.80   124.70     39 <
   5   0 -27     0.83    28.80   124.00     39 <
   5   1 -16     6.00   -28.90   121.50     39 <
   5   1 -15    32.88   -21.40   131.90     39 <
   5   1 -14    60.17   158.40   134.10     39 <
   5   1 -13   139.40   122.20   137.70     39 <
   5   2  -2   320.42  1081.20   148.70     39 o
   5   2  -1   181.88    89.40   148.70     39 <
   5   3  10    15.95    40.80   135.30     39 <
   5   3  11   116.00    19.00   134.50     39 <
   5   3  12    76.06   207.90   135.80     39 <
   5   3  13    17.48    52.40   133.90     39 <
   5   4  21    15.72    15.40   125.90     39 <
   5   4  22    37.98    -5.90   127.30     39 <
   5   4  23     1.46    74.50   123.90     39 <
   5   4  24     3.00   -16.90   129.30     39 <
   6   1 -24     1.26    30.10   128.20     39 <
   6   1 -23     5.47    -3.00   112.10     39 <
   6   1 -22     1.15    -1.50   112.10     39 <
   6   1 -21     1.55    60.60   128.10     39 <
   6   1 -20     3.23   -25.60   123.10     39 <
   6   1 -19     3.79    30.20   131.50     39 <
   6   2  -8    10.79    24.10   133.70     39 <
   6   2  -7     5.33    -0.20   126.80     39 <
   6   2  -6    18.27    92.50   134.50     39 <
   6   2  -5   289.25   109.90   128.20     39 <
   6   3   5    52.59   259.60   132.10     39 <
   6   3   6     5.31   -20.00   135.10     39 <
   6   3   7   146.48   163.40   130.20     39 <
   6   4  16     3.59    36.10   129.20     39 <
   6   4  17     4.03   -11.00   124.60     39 <
   6   4  18    70.99   -13.20   123.70     39 <
   6   4  19     5.58   -20.20   124.40     39 <
   7   2 -15    34.24    42.00   124.10     39 <
   7   2 -14    25.95    -4.80   129.00     39 <
   7   2 -13     6.25   148.90   128.10     39 <
   7   2 -12    13.70    -1.50   124.50     39 <
   7   2 -11    22.54     8.40   127.90     39 <
   7   3  -1    53.88    88.90   129.50     39 <
   7   3   0    40.62     5.10   132.40     39 <
   7   3   1    59.01    45.20   125.80     39 <
   7   3   2    18.74   -14.90   126.80     39 <
   7   4  11    13.56   -10.60   127.90     39 <
   7   4  12     5.00    32.00   131.10     39 <
   7   4  13    85.55   -27.90   123.70     39 <
   7   4  14     7.33    44.00   129.40     39 <
   7   5  22    62.55    17.20   128.20     39 <
   8   2 -18     0.53     5.70   124.70     39 <
   8   2 -17     0.43   -29.00   124.20     39 <
   8   3  -7    85.28    15.20   133.60     39 <
   8   3  -6    26.57    44.00   129.00     39 <
   8   3  -5    32.98    43.50   130.50     39 <
   8   3  -4     4.28   -21.40   127.80     39 <
   8   3  -3     3.78    -6.80   112.10     39 <
   8   4   6     8.25    82.20   133.20     39 <
   8   4   7     6.69   -15.60   130.90     39 <
   8   4   8     3.75   -35.10   124.40     39 <
   8   4   9     1.54    30.80   130.00     39 <
   8   5  17     1.19     3.30   135.30     39 <
  -8  -1  18     0.75   -57.10   140.40     40 <
  -7  -4 -18     8.90   -15.10   126.90     40 <
  -7  -4 -17     5.63   -21.10   130.60     40 <
  -7  -4 -16    49.92    -6.60   134.70     40 <
  -7  -4 -15     5.94   -31.90   131.00     40 <
  -7  -3  -6    21.66   139.10   134.60     40 <
  -7  -3  -5    12.06   -22.60   134.20     40 <
  -7  -3  -4    52.37    -0.00   112.10     40 <
  -7  -2   5    31.44    71.80   131.60     40 <
  -7  -2   6    32.13   -25.60   136.10     40 <
  -7  -2   7    44.30    61.70   134.40     40 <
  -7  -1  15    10.42    -3.50   112.10     40 <
  -7  -1  16     5.08    -7.50   127.60     40 <
  -7  -1  17     8.59    87.10   129.90     40 <
  -6  -4 -23     1.05   -23.10   122.30     40 <
  -6  -4 -22     5.63   -19.60   124.80     40 <
  -6  -4 -21     5.45    -1.30   112.10     40 <
  -6  -4 -20    20.43    -2.20   129.20     40 <
  -6  -4 -19    10.68    34.20   129.00     40 <
  -6  -3 -10    16.40    19.60   123.80     40 <
  -6  -3  -9    19.33   -21.50   131.30     40 <
  -6  -3  -8     4.15    42.10   137.60     40 <
  -6  -2   2     6.37     5.50   128.80     40 <
  -6  -2   3    18.90   -10.00   128.80     40 <
  -6  -1  12     2.61    47.90   131.10     40 <
  -6  -1  13     8.30    57.30   125.30     40 <
  -6  -1  14     7.94   -20.70   124.20     40 <
  -6   0  21     3.59    -4.60   112.10     40 <
  -6   0  22     1.37   -25.90   121.70     40 <
  -6   0  23     1.33    35.20   128.00     40 <
  -5  -4 -28     3.98   -14.30   112.10     40 <
  -5  -4 -27     2.75     6.30   127.50     40 <
  -5  -4 -26     2.39    36.80   126.70     40 <
  -5  -4 -25     6.24   -12.20   119.70     40 <
  -5  -4 -24     4.68    22.40   127.00     40 <
  -5  -4 -23     2.15    -5.70   125.60     40 <
  -5  -3 -14    76.73   -23.80   130.10     40 <
  -5  -3 -13    10.66   -21.00   140.00     40 <
  -5  -3 -12   479.38   846.10   145.30     40 o
  -5  -2  -2   799.69   665.60   148.80     40 o
  -5  -2  -1   541.66   322.30   149.90     40 <
  -5  -1   8     9.72   -29.80   136.40     40 <
  -5  -1   9   197.07   273.40   135.10     40 <
  -5  -1  10    75.72    28.00   135.60     40 <
  -5   0  18   150.48    -6.80   124.70     40 <
  -5   0  19    26.23    51.50   127.50     40 <
  -5   0  20    25.29   -11.50   123.60     40 <
  -4  -4 -29     2.13    22.20   120.00     40 <
  -4  -4 -28     2.37    -6.40   112.10     40 <
  -4  -3 -18   133.64    -2.00   112.10     40 <
  -4  -3 -17    22.42   113.60   136.60     40 <
  -4  -3 -16   229.74   346.60   139.10     40 <
  -4  -2  -6    93.66    95.30   128.70     40 <
  -4  -2  -5   112.17   102.00   141.80     40 <
  -4  -1   5    44.45    30.60   151.50     40 <
  -4  -1   6  1234.70  1284.60   148.10     40 o
  -4   0  15   149.85   296.50   138.80     40 <
  -4   0  16     3.02    12.10   139.60     40 <
  -4   1  24     3.72    -6.50   112.10     40 <
  -3  -3 -23     2.13    -9.60   112.10     40 <
  -3  -3 -22    34.35   -19.90   118.30     40 <
  -3  -3 -21    80.45    23.10   123.30     40 <
  -3  -3 -20     9.25   -20.50   118.80     40 <
  -3  -2 -10    68.21    -6.80   150.10     40 <
  -3  -2  -9    86.28    -8.70   143.70     40 <
  -3  -1   1  5103.90  8565.00   217.30     40 o
  -3  -1   2   236.25    40.80   221.00     40 <
  -3   0  11   117.28    10.40   136.60     40 <
  -3   0  12   324.35   218.00   146.30     40 <
  -3   1  21    32.54   -34.80   120.70     40 <
  -3   1  22    18.42    87.30   129.30     40 <
  -2  -3 -29     1.81    56.70   122.10     40 <
  -2  -3 -28    11.43    11.20   120.10     40 <
  -2  -3 -27    20.57    22.70   121.00     40 <
  -2  -3 -26    46.52   -10.60   123.00     40 <
  -2  -3 -25    11.09   -15.20   119.40     40 <
  -2  -2 -15   452.27   343.20   142.80     40 <
  -2  -2 -14   341.53   249.10   164.40     40 <
  -2  -2 -13  1142.40  1134.10   166.90     40 o
  -2  -1  -2 13794.00 13818.40   476.80     40 o
  -2   0   8    81.42    72.60   167.40     40 <
  -2   1  17   776.23   345.30   170.40     40 <
  -2   1  18    79.53    11.00   150.60     40 <
  -2   1  19   198.81   153.40   134.50     40 <
  -1  -3 -31     0.68   -12.70   112.10     40 <
  -1  -3 -30     3.77    56.10   119.90     40 <
  -1  -2 -20    10.69    23.30   128.90     40 <
  -1  -2 -19    23.78    29.90   133.30     40 <
  -1  -2 -18    96.86   150.70   126.90     40 <
  -1  -1  -7  1975.10  2010.90   251.20     40 o
  -1   0   4  7735.40  8328.30   272.20     40 o
  -1   1  14   690.02   296.80   158.60     40 <
  -1   1  15   179.78   180.50   145.10     40 <
  -1   2  23    22.24   -14.10   120.10     40 <
  -1   2  24    33.65     8.00   124.90     40 <
   0  -2 -25    22.99    -4.30   112.10     40 <
   0  -2 -24     3.00    32.70   124.40     40 <
   0  -2 -23   333.08    88.80   127.10     40 <
   0  -2 -22    38.79    39.60   134.90     40 <
   0  -1 -12    68.29   158.00   160.10     40 <
   0  -1 -11   223.01     8.80   167.90     40 <
   0   1  10   955.20   532.70   179.60     40 <
   0   1  11   229.22   -37.00   160.60     40 <
   0   2  19    30.37    -0.20   156.90     40 <
   0   2  20  1194.60  1358.50   150.80     40 o
   0   2  21    85.53    83.30   150.90     40 <
   1  -2 -30     1.49    24.30   128.40     40 <
   1  -2 -29     6.41   104.60   123.70     40 <
   1  -2 -28     6.45     1.00   123.40     40 <
   1  -2 -27     3.70    79.60   126.90     40 <
   1  -1 -17    12.12    25.50   126.80     40 <
   1  -1 -16    33.79   -26.00   126.90     40 <
   1  -1 -15   167.93    68.50   145.50     40 <
   1   1   6  5441.30  4006.70   271.10     40 o
   1   2  16   324.39   524.40   135.70     40 o
   1   2  17    72.39    -4.90   135.00     40 <
   1   3  25     9.86     0.50   112.10     40 <
   2  -1 -23     8.22   -14.30   126.60     40 <
   2  -1 -22    25.11    60.00   124.70     40 <
   2  -1 -21    37.33     4.50   125.10     40 <
   2  -1 -20    86.20    -7.70   112.10     40 <
   2   0  -9   161.41   341.50   195.50     40 <
   2   1   2 11547.00  9616.20   371.50     40 o
   2   2  12   701.15   267.50   170.70     40 <
   2   2  13  1145.90  1646.50   162.90     40 o
   2   3  21   129.90     3.70   126.90     40 <
   2   3  22     3.64     6.20   119.10     40 <
   2   3  23    90.26    -7.80   125.80     40 <
   3  -1 -29     8.80    44.70   124.10     40 <
   3  -1 -28     1.92   -20.30   112.10     40 <
   3  -1 -27     2.52    12.10   121.60     40 <
   3  -1 -26     7.70   -12.10   118.30     40 <
   3  -1 -25    14.52   -12.40   118.10     40 <
   3   0 -15    23.40    -3.50   130.90     40 <
   3   0 -14   156.47   139.80   140.20     40 <
   3   0 -13   477.58   324.20   160.20     40 <
   3   1  -3    24.51    77.60   161.20     40 <
   3   1  -2   199.80   170.50   180.60     40 <
   3   2   8   494.35   359.60   154.60     40 <
   3   3  17    20.64   -16.10   124.10     40 <
   3   3  18    18.35   -29.20   121.20     40 <
   3   3  19   324.60    84.60   125.40     40 <
   4  -1 -30     2.20     1.10   119.90     40 <
   4   0 -21     5.55    -2.80   129.50     40 <
   4   0 -20   346.44   258.40   130.50     40 <
   4   0 -19     4.11    11.70   135.90     40 <
   4   0 -18    67.07   134.20   126.30     40 <
   4   1  -8   237.48   262.50   131.20     40 <
   4   1  -7   106.82    -5.80   164.30     40 <
   4   2   3   200.85    43.90   144.70     40 <
   4   2   4   317.76    55.60   137.50     40 <
   4   3  13   138.80    64.10   128.50     40 <
   4   3  14    33.33    72.50   128.40     40 <
   4   3  15    39.89     5.20   126.80     40 <
   4   4  22     9.79     0.70   112.10     40 <
   4   4  23    21.00    -1.20   112.10     40 <
   4   4  24     5.54    -6.90   121.40     40 <
   5   0 -27     1.50    29.30   119.20     40 <
   5   0 -26    32.78    53.40   122.20     40 <
   5   0 -25     2.27    50.80   120.40     40 <
   5   0 -24    13.07    49.90   125.50     40 <
   5   0 -23     8.70    66.40   122.40     40 <
   5   1 -13    55.49    -8.30   130.00     40 <
   5   1 -12   128.82    83.30   129.80     40 <
   5   1 -11    56.82    64.80   129.70     40 <
   5   2  -2   602.50   523.80   146.60     40 o
   5   2  -1   280.19   321.20   146.40     40 <
   5   3   9    56.92    22.10   125.90     40 <
   5   3  10    29.50    32.00   125.50     40 <
   5   4  18    10.72    -7.00   119.60     40 <
   5   4  19    36.64   -17.40   120.10     40 <
   5   4  20    42.43    -0.10   112.10     40 <
   6   1 -19     2.31    12.70   124.60     40 <
   6   1 -18     3.16     0.20   112.10     40 <
   6   1 -17    36.68     9.80   122.20     40 <
   6   1 -16     8.75    -2.60   112.10     40 <
   6   2  -7    18.24    31.60   125.00     40 <
   6   2  -6    51.36     5.80   137.40     40 <
   6   2  -5   215.96   461.40   146.60     40 o
   6   3   4    23.44   105.10   131.80     40 <
   6   3   5    32.85    48.40   122.70     40 <
   6   3   6    23.13    56.00   135.20     40 <
   6   4  14    17.76   -18.50   122.60     40 <
   6   4  15     1.94     0.90   116.70     40 <
   6   4  16     2.04    -4.60   119.80     40 <
   6   5  23     1.08     7.60   125.70     40 <
   6   5  24     0.74     8.80   125.10     40 <
   6   5  25     0.85     8.00   123.30     40 <
   7   1 -23     5.89    87.10   122.80     40 <
   7   1 -22     1.27    -6.80   121.70     40 <
   7   1 -21     7.74    95.60   123.90     40 <
   7   2 -12    21.37    31.10   123.50     40 <
   7   2 -11    31.19     0.60   123.40     40 <
   7   2 -10     6.57    -1.60   121.60     40 <
   7   3  -1    59.94   -15.80   123.70     40 <
   7   3   0     4.25     2.40   125.30     40 <
   7   3   1    59.72    37.60   128.60     40 <
   7   4   9     5.20    76.70   128.70     40 <
   7   4  10     5.11    23.10   128.00     40 <
   7   4  11     6.44   -17.00   121.30     40 <
   7   4  12    24.52    31.90   125.30     40 <
   7   5  19     1.27     0.60   122.10     40 <
   7   5  20     2.07   -17.60   123.10     40 <
   7   5  21     3.22   -22.00   122.50     40 <
   7   5  22    63.86     0.30   112.10     40 <
   8   2 -18     0.80   -26.90   125.80     40 <
   8   2 -17     0.77    -7.00   122.40     40 <
   8   2 -16     1.25    51.70   130.90     40 <
   8   2 -15     2.41   -29.70   122.70     40 <
   8   3  -6    39.83    72.10   131.80     40 <
   8   3  -5     5.81    28.20   130.40     40 <
   8   3  -4     9.81    68.40   128.80     40 <
   8   3  -3    17.43     2.40   130.30     40 <
   8   4   5     6.34   -31.70   129.40     40 <
   8   4   6     2.32    -4.40   128.00     40 <
   8   4   7     9.89   -17.50   123.80     40 <
   8   5  14     4.67    -7.70   127.00     40 <
   8   5  15     1.17   -25.10   131.90     40 <
   8   5  16     2.15    99.10   136.00     40 <
   8   5  17     1.22    14.00   133.80     40 <
  -8  -1  18     0.10    31.80   142.00     41 <
  -7  -4 -18     7.38   141.70   136.40     41 <
  -7  -4 -17     2.37    60.20   138.60     41 <
  -7  -4 -16    43.06    11.10   140.00     41 <
  -7  -4 -15     2.44   -17.00   134.40     41 <
  -7  -3  -7     8.98     2.00   135.20     41 <
  -7  -3  -6    27.32    94.10   138.20     41 <
  -7  -3  -5    16.65     9.30   133.20     41 <
  -7  -3  -4    17.09   188.20   138.90     41 <
  -7  -2   4    22.82    26.40   133.90     41 <
  -7  -2   5    14.85   -47.20   128.00     41 <
  -7  -2   6    52.28   -27.20   135.40     41 <
  -7  -1  13     2.24    23.30   131.70     41 <
  -7  -1  14    12.29   -22.20   130.30     41 <
  -7  -1  15     6.37    -9.10   131.30     41 <
  -7   0  22    11.48   -33.30   129.50     41 <
  -7   0  23     1.96    68.50   131.80     41 <
  -6  -4 -22     4.32     0.50   112.10     41 <
  -6  -4 -21     1.01    15.60   132.20     41 <
  -6  -4 -20    22.11    17.60   129.20     41 <
  -6  -4 -19     1.34   -16.40   130.90     41 <
  -6  -4 -18     1.66    68.90   131.40     41 <
  -6  -3 -10     1.74    42.20   131.70     41 <
  -6  -3  -9    15.85    60.70   131.60     41 <
  -6  -3  -8     2.15    31.40   146.60     41 <
  -6  -2   1    59.48    61.40   132.40     41 <
  -6  -2   2     3.18   -46.40   126.90     41 <
  -6  -1  10    22.81    63.80   137.50     41 <
  -6  -1  11     4.23   201.60   138.10     41 <
  -6  -1  12     2.90   -11.70   112.10     41 <
  -6   0  19     7.18    71.00   132.30     41 <
  -6   0  20    12.66    15.60   131.80     41 <
  -6   0  21     1.34   -11.70   130.60     41 <
  -5  -4 -26     1.52   -23.40   119.40     41 <
  -5  -4 -25     1.90    -3.10   112.10     41 <
  -5  -4 -24     1.44   -23.20   126.40     41 <
  -5  -4 -23     0.71    21.60   130.70     41 <
  -5  -4 -22     7.79    -9.80   130.10     41 <
  -5  -3 -13     5.93    11.60   141.10     41 <
  -5  -3 -12   379.90   649.00   146.10     41 o
  -5  -2  -3    34.32    20.10   164.80     41 <
  -5  -2  -2   420.16   319.90   149.20     41 <
  -5  -2  -1   325.08   378.50   149.10     41 <
  -5  -1   7   160.17   206.90   151.80     41 <
  -5  -1   8     2.03   -27.20   145.90     41 <
  -5   0  16   551.17   303.90   144.40     41 <
  -5   0  17    11.00    72.60   126.30     41 <
  -5   0  18   164.90    31.10   131.60     41 <
  -5   1  24     1.12   -23.40   126.20     41 <
  -4  -4 -29     0.40    10.20   128.30     41 <
  -4  -4 -28     0.47   -23.60   120.10     41 <
  -4  -4 -27     0.19    16.60   126.00     41 <
  -4  -4 -26     1.58    -4.70   127.20     41 <
  -4  -3 -17     3.82   -23.60   137.40     41 <
  -4  -3 -16   207.48   218.90   130.90     41 <
  -4  -3 -15    25.26    62.20   139.50     41 <
  -4  -2  -6    45.62    85.70   149.00     41 <
  -4  -2  -5    31.05   193.20   147.80     41 <
  -4  -1   4    77.85   -25.20   151.00     41 <
  -4  -1   5    32.74    92.20   163.20     41 <
  -4   0  13   553.35   565.10   140.70     41 o
  -4   0  14    34.29    52.80   150.90     41 <
  -4   1  22     4.13    55.90   134.60     41 <
  -4   1  23     2.39   -12.50   128.10     41 <
  -4   1  24     2.90    10.00   124.40     41 <
  -3  -4 -31     0.24   -11.60   124.80     41 <
  -3  -4 -30     1.36    -9.20   112.10     41 <
  -3  -3 -21    79.87     6.70   127.90     41 <
  -3  -3 -20     7.86   -22.60   129.40     41 <
  -3  -3 -19    85.79   101.80   135.10     41 <
  -3  -2 -10    25.04    80.20   154.70     41 <
  -3  -2  -9    52.92     9.20   145.80     41 <
  -3  -1   1  4064.60  3792.10   208.10     41 o
  -3   0  10   121.76    43.60   164.10     41 <
  -3   0  11    96.01    -5.90   143.10     41 <
  -3   1  19   159.28    85.30   129.40     41 <
  -3   1  20     4.02   -15.80   129.80     41 <
  -2  -3 -26    42.50    -2.10   117.20     41 <
  -2  -3 -25     1.37    -1.70   123.70     41 <
  -2  -3 -24     6.89    10.00   125.10     41 <
  -2  -3 -23    31.69   -21.20   127.10     41 <
  -2  -2 -14   329.66   489.90   173.00     41 <
  -2  -2 -13   895.71  1278.80   171.30     41 o
  -2  -1  -3 21566.00 22243.20   395.80     41 o
  -2   0   7    80.50   -84.20   206.80     41 <
  -2   1  16   988.73   751.70   163.70     41 o
  -2   1  17   923.17   990.70   161.20     41 o
  -2   2  24     8.79   -10.70   124.30     41 <
  -1  -3 -31     0.84    25.40   127.60     41 <
  -1  -3 -30     2.83    10.40   125.60     41 <
  -1  -3 -29     1.93    36.60   121.60     41 <
  -1  -3 -28     0.42    29.70   123.10     41 <
  -1  -3 -27     2.92    -6.90   123.70     41 <
  -1  -2 -18    63.57     9.60   130.20     41 <
  -1  -2 -17    49.35    66.30   140.90     41 <
  -1  -2 -16   404.13   512.10   140.90     41 o
  -1  -1  -6  4783.60  4574.80   273.40     41 o
  -1   0   4  7775.20  8074.40   269.90     41 o
  -1   1  13   313.82   265.90   163.80     41 <
  -1   2  21     9.17    -1.00   112.10     41 <
  -1   2  22    11.55    43.60   125.10     41 <
  -1   2  23    17.54   118.30   137.30     41 <
   0  -2 -23   294.09   110.00   132.50     41 <
   0  -2 -22    37.14    39.40   127.60     41 <
   0  -2 -21    49.91   -11.00   112.10     41 <
   0  -2 -20  1369.60  1233.40   148.70     41 o
   0  -1 -11   146.51    26.70   171.10     41 <
   0  -1 -10   987.87   555.80   189.00     41 <
   0   1  10   997.05   923.50   189.70     41 o
   0   2  18   466.88   800.90   141.60     41 o
   0   2  19    29.83   -40.40   167.20     41 <
   1  -2 -28     4.06    -4.40   128.20     41 <
   1  -2 -27     1.16   -13.10   128.10     41 <
   1  -2 -26     2.25    22.00   132.30     41 <
   1  -2 -25    13.88   123.60   134.40     41 <
   1  -1 -15   148.76   184.60   148.80     41 <
   1  -1 -14   583.09   365.40   137.10     41 <
   1   0  -4  6692.10  7469.70   268.90     41 o
   1   1   6  4492.10  3949.60   292.30     41 o
   1   2  15    97.91   191.70   148.90     41 <
   1   2  16   399.37   781.90   148.70     41 o
   1   3  23    20.97    53.00   133.40     41 <
   1   3  24     3.04   114.40   129.80     41 <
   1   3  25     3.58     5.40   127.20     41 <
   2  -2 -30     7.72   -21.60   124.40     41 <
   2  -2 -29     3.58    20.80   121.60     41 <
   2  -1 -20    58.52    73.50   124.60     41 <
   2  -1 -19   154.33   207.30   138.50     41 <
   2  -1 -18    65.08    45.70   147.20     41 <
   2   0  -8   131.61   308.20   182.20     41 <
   2   1   2 11923.00 10881.20   438.00     41 o
   2   2  11   261.91    -0.20   153.40     41 <
   2   2  12   435.42   249.40   164.80     41 <
   2   3  20    50.15   148.60   127.50     41 <
   2   3  21    22.00   -26.00   123.40     41 <
   3  -1 -25    10.76    -2.80   124.20     41 <
   3  -1 -24    71.30    42.50   126.50     41 <
   3  -1 -23     4.00    -7.80   112.10     41 <
   3  -1 -22    22.00   -21.50   124.20     41 <
   3   0 -13   437.74   290.60   158.50     41 <
   3   0 -12   302.80   304.60   153.10     41 <
   3   1  -2   257.58    81.10   216.20     41 <
   3   2   8   559.42   568.20   156.50     41 o
   3   3  16    39.54     9.20   129.20     41 <
   3   3  17     5.65    47.00   127.10     41 <
   3   3  18    17.90     8.80   131.90     41 <
   3   4  25     0.81   -11.60   120.70     41 <
   4  -1 -30     0.73    60.50   125.40     41 <
   4  -1 -29     0.82    60.20   123.80     41 <
   4  -1 -28     0.46    -3.00   112.10     41 <
   4  -1 -27    14.61    21.20   120.20     41 <
   4   0 -18    50.62   441.00   132.70     41 o
   4   0 -17    44.17   178.10   141.90     41 <
   4   0 -16     3.46     5.00   131.40     41 <
   4   1  -6  1119.20  1443.40   155.70     41 o
   4   2   4   224.46   138.90   132.90     41 <
   4   3  13   147.72    78.20   143.10     41 <
   4   3  14    12.34    49.50   140.80     41 <
   4   4  21     5.06     7.00   128.70     41 <
   4   4  22     2.66   -10.70   121.70     41 <
   4   4  23    18.70    -6.80   123.30     41 <
   5   0 -23     1.92    88.70   127.80     41 <
   5   0 -22     2.42    -9.00   126.10     41 <
   5   0 -21    63.59    20.40   129.10     41 <
   5   0 -20    23.15    42.80   125.10     41 <
   5   1 -11    37.53    29.80   135.40     41 <
   5   1 -10    33.65    28.70   136.50     41 <
   5   2  -1   331.03   159.50   146.50     41 <
   5   3   9    35.39    35.90   130.20     41 <
   5   3  10    18.54    38.20   130.00     41 <
   5   4  18    10.50   -15.20   124.60     41 <
   5   4  19    30.05   100.70   129.80     41 <
   6   0 -26     1.97    -2.20   112.10     41 <
   6   0 -25     2.04    71.10   122.70     41 <
   6   1 -16     1.33    -0.80   126.30     41 <
   6   1 -15    11.04    -4.70   112.10     41 <
   6   1 -14     5.06   -12.50   127.30     41 <
   6   2  -5   160.08   314.10   142.10     41 <
   6   2  -4    91.41   201.10   140.20     41 <
   6   3   5    39.49    97.10   127.00     41 <
   6   3   6    22.68    19.50   142.70     41 <
   6   4  14    13.71    66.80   129.50     41 <
   6   4  15     1.94   -12.30   129.80     41 <
   6   4  16     4.98    94.30   125.60     41 <
   6   5  22     3.55    80.00   128.50     41 <
   6   5  23     0.13    71.20   124.00     41 <
   6   5  24     0.38   -13.90   125.80     41 <
   6   5  25     0.30    55.50   131.00     41 <
   7   1 -22     0.76   -20.90   123.50     41 <
   7   1 -21     5.25    17.90   127.20     41 <
   7   1 -20     0.15    -4.20   118.60     41 <
   7   1 -19     4.38   -27.40   128.40     41 <
   7   1 -18     5.29    64.90   124.00     41 <
   7   2 -10     0.73    -5.80   127.20     41 <
   7   2  -9     5.58    79.90   127.60     41 <
   7   2  -8    15.00   -19.70   127.70     41 <
   7   3   0     4.38   -15.30   130.20     41 <
   7   3   1    32.65    65.20   128.30     41 <
   7   3   2    17.26    77.10   132.00     41 <
   7   4  10     1.03    40.30   124.90     41 <
   7   4  11     7.20    24.90   130.80     41 <
   7   4  12     9.64   -25.10   127.80     41 <
   7   5  18     2.84    58.50   124.10     41 <
   7   5  19     1.01    38.70   128.70     41 <
   7   5  20     1.54    -4.60   124.60     41 <
   7   5  21     6.39    42.00   128.50     41 <
   8   2 -15     0.39    49.70   135.40     41 <
   8   2 -14     0.33   141.30   137.50     41 <
   8   2 -13     7.04   123.30   134.30     41 <
   8   2 -12     1.07    78.20   135.30     41 <
   8   3  -5     5.98    28.80   134.40     41 <
   8   3  -4     5.25    73.40   135.50     41 <
   8   3  -3    24.34     8.00   135.20     41 <
   8   3  -2     3.25   173.00   140.00     41 <
   8   4   5     0.46   210.10   139.10     41 <
   8   4   6     2.32    -0.40   131.50     41 <
   8   4   7     8.18    89.30   132.70     41 <
   8   4   8     8.03    -3.80   131.70     41 <
   8   5  14     2.77   -38.00   134.80     41 <
   8   5  15     0.24    42.40   133.00     41 <
   8   5  16     1.10    -6.30   132.20     41 <
   8   5  17     0.15   139.20   135.20     41 <
  -7  -4 -16    35.53    -8.40   133.50     42 <
  -7  -4 -15     1.57    51.60   129.90     42 <
  -7  -4 -14    14.68   -46.80   124.90     42 <
  -7  -3  -7     4.80    18.90   132.90     42 <
  -7  -3  -6    28.46   115.10   137.20     42 <
  -7  -3  -5     7.81    27.80   129.90     42 <
  -7  -2   2    12.04    13.90   133.20     42 <
  -7  -2   3    30.62   -44.30   130.10     42 <
  -7  -2   4    28.65   -20.20   124.50     42 <
  -7  -1  11     6.10   155.60   136.60     42 <
  -7  -1  12    14.52   -34.80   131.40     42 <
  -7   0  18     7.91    -3.10   128.80     42 <
  -7   0  19     4.10   -17.10   131.30     42 <
  -7   0  20     1.02   -13.00   126.10     42 <
  -6  -4 -19     0.43    96.70   125.70     42 <
  -6  -4 -18     0.84   -14.70   112.10     42 <
  -6  -4 -17     1.77    40.00   122.40     42 <
  -6  -3  -9    14.61   -26.90   127.80     42 <
  -6  -3  -8     0.46    28.70   144.40     42 <
  -6  -2   0    64.97   -26.60   129.90     42 <
  -6  -2   1    50.65    78.10   127.90     42 <
  -6  -1   8     1.42     6.90   143.60     42 <
  -6  -1   9     1.67    65.10   130.60     42 <
  -6   0  16     7.71    39.50   123.70     42 <
  -6   0  17     1.86    -0.30   123.50     42 <
  -6   0  18     4.03    -3.70   126.50     42 <
  -6   1  24     0.44    30.70   121.00     42 <
  -5  -4 -23     0.85    73.80   124.00     42 <
  -5  -4 -22     4.47     0.00   112.10     42 <
  -5  -4 -21     1.21    58.80   126.20     42 <
  -5  -4 -20    36.38     1.70   126.40     42 <
  -5  -3 -12   301.13   693.40   139.60     42 o
  -5  -3 -11   115.72    -1.90   135.80     42 <
  -5  -2  -3    14.85   -11.50   154.00     42 <
  -5  -2  -2   380.43   751.50   153.40     42 o
  -5  -1   6   286.00   528.00   155.70     42 o
  -5  -1   7   128.83    85.10   142.60     42 <
  -5   0  14    12.72   -10.40   138.20     42 <
  -5   0  15   435.57    -7.10   133.40     42 <
  -5   1  21     5.66   -17.20   123.10     42 <
  -5   1  22    11.82   103.40   125.60     42 <
  -5   1  23    13.10   -22.60   120.30     42 <
  -4  -4 -26     1.40    -2.70   112.10     42 <
  -4  -4 -25     1.90   -18.60   121.00     42 <
  -4  -4 -24     1.33    38.40   123.40     42 <
  -4  -4 -23    13.18    19.20   121.90     42 <
  -4  -3 -15    23.47    40.80   135.10     42 <
  -4  -3 -14     8.68   107.30   126.00     42 <
  -4  -2  -6    40.48   -20.40   133.20     42 <
  -4  -2  -5    13.15    90.20   134.70     42 <
  -4  -1   3   333.17   128.70   155.20     42 <
  -4  -1   4    72.46   -22.70   137.10     42 <
  -4   0  11     7.97    34.80   143.90     42 <
  -4   0  12   207.46    34.80   146.80     42 <
  -4   1  19    14.52    10.70   126.70     42 <
  -4   1  20     7.03   -28.50   126.30     42 <
  -3  -4 -30     0.86    -0.20   112.10     42 <
  -3  -4 -29     8.97    28.50   121.90     42 <
  -3  -4 -28     0.20    -4.80   112.10     42 <
  -3  -4 -27     2.87    -0.40   112.10     42 <
  -3  -3 -19    98.41    18.50   128.30     42 <
  -3  -3 -18    17.03    87.50   131.30     42 <
  -3  -3 -17     4.50    29.80   121.60     42 <
  -3  -2  -9    44.59   -40.70   144.40     42 <
  -3  -2  -8   499.09   943.20   154.10     42 o
  -3  -1   0   193.07   282.30   274.30     42 <
  -3  -1   1  4178.20  4346.50   198.30     42 o
  -3   0   9  1183.20   657.50   172.40     42 o
  -3   1  17    32.51    25.60   129.40     42 <
  -3   1  18    13.76    -0.40   127.20     42 <
  -3   2  24     1.18   -15.00   123.20     42 <
  -2  -4 -31     1.92   -19.10   120.30     42 <
  -2  -4 -30     1.19   -13.30   124.90     42 <
  -2  -3 -22     4.96    22.30   127.20     42 <
  -2  -3 -21    17.07   121.20   132.60     42 <
  -2  -3 -20    43.05   -15.60   119.80     42 <
  -2  -2 -12   326.52   264.20   160.60     42 <
  -2  -2 -11   215.20   256.60   146.70     42 <
  -2   0   6  1988.50  2325.30   251.40     42 o
  -2   1  14   133.35   139.80   136.10     42 <
  -2   1  15     4.07    17.60   148.20     42 <
  -2   2  21    53.93    -6.10   122.90     42 <
  -2   2  22     1.27   -13.60   126.30     42 <
  -2   2  23    30.53   -15.10   122.30     42 <
  -1  -3 -26     1.95     0.60   121.70     42 <
  -1  -3 -25     2.65   -12.20   123.00     42 <
  -1  -3 -24     2.61    -1.00   121.30     42 <
  -1  -2 -15    79.40   105.70   148.70     42 <
  -1  -1  -6  4459.50  4408.90   270.70     42 o
  -1   0   3   763.50   782.00   285.40     42 <
  -1   1  11    73.03   -11.80   143.60     42 <
  -1   1  12   225.48   -27.40   149.10     42 <
  -1   2  19     9.78    -4.10   119.50     42 <
  -1   2  20    12.72   -14.10   128.40     42 <
   0  -3 -30     2.26     2.60   122.80     42 <
   0  -3 -29     0.73    14.80   125.10     42 <
   0  -3 -28    12.20    19.60   129.10     42 <
   0  -3 -27   128.17   116.40   129.80     42 <
   0  -2 -19    23.37    14.90   157.40     42 <
   0  -2 -18   357.42   676.70   138.30     42 o
   0  -1  -9   540.42   605.90   200.70     42 o
   0   2  16   363.32   613.00   137.90     42 o
   0   2  17    66.60   -12.20   148.60     42 <
   0   3  24    32.37    18.00   122.40     42 <
   0   3  25     5.72     1.20   122.20     42 <
   1  -2 -23    11.46    26.90   123.30     42 <
   1  -2 -22     9.51    -4.60   112.10     42 <
   1  -2 -21     5.12   -24.80   124.70     42 <
   1  -1 -13   275.66   304.00   164.30     42 <
   1  -1 -12   213.95   107.60   152.70     42 <
   1   0  -3   717.53   948.30   296.90     42 o
   1   2  13    59.07    -4.80   129.20     42 <
   1   2  14    62.19    62.00   130.50     42 <
   1   3  21     5.17     5.10   126.60     42 <
   1   3  22    59.40    11.60   123.10     42 <
   2  -2 -27     7.43    -1.40   122.40     42 <
   2  -2 -26    11.25    70.70   124.40     42 <
   2  -2 -25     2.39   -21.70   123.60     42 <
   2  -1 -17   838.01   708.70   153.70     42 o
   2  -1 -16   811.96   756.60   153.70     42 o
   2  -1 -15     3.95     4.50   141.40     42 <
   2   0  -7    96.68   259.50   212.10     42 <
   2   1   2 10734.00 11000.70   385.10     42 o
   2   2  10   213.60   342.80   149.40     42 <
   2   2  11   215.82    40.80   156.20     42 <
   2   3  18     0.64   -19.80   122.80     42 <
   2   3  19    35.47     1.60   122.40     42 <
   2   4  25     1.16    -3.10   124.20     42 <
   3  -2 -30     1.25    -5.40   119.90     42 <
   3  -2 -29    12.53    46.90   122.10     42 <
   3  -2 -28     2.51   -11.90   119.20     42 <
   3  -1 -21    15.12   -14.60   125.10     42 <
   3  -1 -20     2.17    37.80   127.60     42 <
   3  -1 -19   136.54    72.80   125.90     42 <
   3   0 -11    97.30    -4.50   139.60     42 <
   3   0 -10   131.96   -14.80   148.20     42 <
   3   1  -1  3787.10  3479.70   188.90     42 o
   3   2   7   520.34   729.50   164.10     42 o
   3   2   8   514.27   488.60   158.90     42 o
   3   3  15    10.19   -34.10   121.50     42 <
   3   3  16    29.79   -21.50   123.70     42 <
   3   4  22    14.72   -15.70   122.80     42 <
   3   4  23     9.19    34.50   120.00     42 <
   3   4  24     7.66    30.30   125.80     42 <
   4  -1 -25     1.45    -8.40   122.10     42 <
   4  -1 -24     2.04   -16.90   121.30     42 <
   4  -1 -23     2.19    38.90   122.70     42 <
   4  -1 -22     2.87   -14.20   119.90     42 <
   4   0 -15   156.57   135.20   135.70     42 <
   4   0 -14    31.08    74.10   148.40     42 <
   4   0 -13   482.71   905.00   145.80     42 o
   4   1  -5     7.58    20.50   151.60     42 <
   4   1  -4    74.86   -37.00   140.90     42 <
   4   2   4   141.94     7.80   133.40     42 <
   4   3  12   118.70   163.00   126.60     42 <
   4   3  13   132.41    42.10   135.00     42 <
   4   4  19     4.79    59.10   126.70     42 <
   4   4  20     8.11    13.60   125.30     42 <
   4   4  21     6.05    28.80   125.30     42 <
   5  -1 -28     1.62   -14.90   119.30     42 <
   5  -1 -27     2.78    15.60   118.80     42 <
   5  -1 -26     2.42    23.00   121.60     42 <
   5   0 -19    31.24     9.90   120.80     42 <
   5   0 -18   113.10   -18.90   118.60     42 <
   5   0 -17     6.98    12.70   140.10     42 <
   5   1  -9   206.88   182.70   128.00     42 <
   5   1  -8     1.85     8.60   136.90     42 <
   5   2   1   245.00   156.60   140.80     42 <
   5   3   8    55.83   -21.00   126.20     42 <
   5   3   9    20.32     6.20   124.30     42 <
   5   3  10    14.20   -15.00   127.40     42 <
   5   4  16    58.33    67.00   128.80     42 <
   5   4  17     1.90    61.90   127.70     42 <
   5   4  18    10.97   -19.10   123.90     42 <
   5   5  24    26.77     8.50   121.30     42 <
   5   5  25     0.68    -4.00   112.10     42 <
   6   0 -23     1.09   -17.30   123.00     42 <
   6   0 -22     1.02    -2.50   112.10     42 <
   6   0 -21     1.63   -19.50   122.60     42 <
   6   0 -20     9.82   -21.90   120.00     42 <
   6   1 -13     5.30   -15.40   121.70     42 <
   6   1 -12     1.60   -13.50   124.20     42 <
   6   1 -11     3.08    43.20   121.70     42 <
   6   2  -4    87.17   186.40   142.70     42 <
   6   2  -3     5.45     6.80   133.50     42 <
   6   2  -2     5.01    80.90   130.90     42 <
   6   3   5    28.10    22.90   129.40     42 <
   6   3   6    21.22    11.00   132.00     42 <
   6   4  13    12.51    31.80   129.30     42 <
   6   4  14    14.84     3.10   121.90     42 <
   6   4  15     1.39    29.10   126.80     42 <
   6   5  21     0.15     9.70   121.50     42 <
   6   5  22     3.55   -15.30   123.50     42 <
   6   5  23     0.21    -0.90   112.10     42 <
   7   1 -17     3.81   -22.90   121.60     42 <
   7   1 -16     1.15    34.60   128.00     42 <
   7   1 -15     4.67   -13.80   112.10     42 <
   7   2  -8    11.37    46.40   123.00     42 <
   7   2  -7    26.06   -30.00   129.40     42 <
   7   2  -6    35.03    63.50   128.30     42 <
   7   3   1    28.60   126.00   129.80     42 <
   7   3   2    13.50   -18.90   126.90     42 <
   7   3   3     1.84    58.00   123.70     42 <
   7   4  10     0.78   -10.20   121.50     42 <
   7   4  11     5.54    -8.70   128.60     42 <
   7   5  17    15.93    49.20   124.90     42 <
   7   5  18     1.85    57.00   129.20     42 <
   7   5  19     0.92    15.40   126.40     42 <
   8   2 -12     0.75    22.10   129.20     42 <
   8   2 -11     5.42    85.30   126.50     42 <
   8   2 -10    36.63     4.70   124.70     42 <
   8   2  -9     6.19   -20.30   125.90     42 <
   8   3  -3    22.34    -5.00   125.80     42 <
   8   3  -2     3.65    45.00   133.00     42 <
   8   3  -1     4.34   -20.70   120.90     42 <
   8   4   6     2.53     5.80   127.30     42 <
   8   4   7     5.77    71.50   131.50     42 <
   8   4   8     5.06    95.90   128.80     42 <
   8   5  14     2.08   102.60   134.80     42 <
   8   5  15     0.28     4.40   131.50     42 <
   8   5  16     0.75    15.80   131.50     42 <
  -8   0  15    14.79    88.30   136.00     44 <
  -8   0  16     0.48   -63.40   137.80     44 <
  -8   0  17     1.29   -60.10   139.00     44 <
  -7  -4 -19     7.86     0.80   130.80     44 <
  -7  -4 -18     4.12    -0.40   133.60     44 <
  -7  -4 -17     3.84    84.50   135.80     44 <
  -7  -4 -16    33.63   -42.60   134.60     44 <
  -7  -3 -10     8.91     9.50   135.40     44 <
  -7  -3  -9     8.93   -36.80   141.50     44 <
  -7  -3  -8    22.24    83.00   136.10     44 <
  -7  -2  -2    15.05   197.80   134.90     44 <
  -7  -2  -1    29.62   -43.60   132.80     44 <
  -7  -1   6     9.14   -34.30   137.90     44 <
  -7  -1   7     5.03   -13.10   112.10     44 <
  -7   0  13     6.38    13.00   132.60     44 <
  -7   0  14     1.30   -24.00   134.30     44 <
  -7   0  15    29.29   -35.80   130.60     44 <
  -7   1  20     0.72   162.10   139.60     44 <
  -7   1  21     3.03   -30.80   133.20     44 <
  -7   1  22     0.91   -19.50   129.40     44 <
  -6  -4 -21     0.80    99.50   137.90     44 <
  -6  -4 -20    14.99   -37.80   128.90     44 <
  -6  -4 -19     1.20    34.90   132.70     44 <
  -6  -3 -12     1.85    -1.80   112.10     44 <
  -6  -3 -11    10.35   -44.20   130.20     44 <
  -6  -3 -10     8.84    44.20   133.10     44 <
  -6  -2  -3    11.31    97.50   143.50     44 <
  -6  -2  -2     4.05   108.00   132.30     44 <
  -6  -1   4    12.15    27.40   137.60     44 <
  -6  -1   5    67.12    33.30   137.20     44 <
  -6   0  12    41.14    21.20   140.70     44 <
  -6   0  13    73.23   165.80   134.50     44 <
  -6   1  19     2.24   -21.30   130.70     44 <
  -6   1  20     0.71    52.70   128.80     44 <
  -5  -4 -23     0.56   -12.50   126.60     44 <
  -5  -4 -22     5.54   -27.90   123.10     44 <
  -5  -4 -21     1.00   -12.80   123.90     44 <
  -5  -3 -14    37.53    -0.40   131.50     44 <
  -5  -3 -13     6.01    44.30   144.00     44 <
  -5  -2  -5   559.49   783.40   179.30     44 o
  -5  -1   3    57.11    79.60   141.70     44 <
  -5   0  10   289.78   549.70   166.30     44 o
  -5   0  11   147.55   122.90   151.10     44 <
  -5   1  17     8.04   114.40   126.90     44 <
  -5   1  18    30.51   -30.80   132.20     44 <
  -5   2  24     0.51    94.50   125.60     44 <
  -4  -4 -25     1.48    -0.50   123.60     44 <
  -4  -4 -24     1.06    47.40   124.10     44 <
  -4  -4 -23    10.76   -16.00   122.80     44 <
  -4  -3 -16   197.61   318.20   132.80     44 <
  -4  -3 -15    21.57    58.00   141.70     44 <
  -4  -2  -7   109.89   -15.30   139.50     44 <
  -4  -1   1   462.48   363.00   166.00     44 <
  -4   0   8   746.50   959.70   152.00     44 o
  -4   0   9   138.78    21.30   161.50     44 <
  -4   1  16    14.43   -38.30   132.40     44 <
  -4   2  22     5.82    22.10   127.50     44 <
  -4   2  23    17.89   -33.00   129.80     44 <
  -4   2  24     6.70   -20.90   128.30     44 <
  -3  -4 -28     0.20    -1.00   112.10     44 <
  -3  -4 -27     4.27    19.30   120.80     44 <
  -3  -4 -26     4.01    -4.10   120.50     44 <
  -3  -3 -18    16.11    23.10   133.20     44 <
  -3  -3 -17     7.18    47.60   131.50     44 <
  -3  -2  -9    38.60    54.90   155.20     44 <
  -3  -1  -1  3701.90  2845.60   203.30     44 o
  -3   0   7  2369.70  2269.30   186.50     44 o
  -3   1  14   359.11   157.50   133.40     44 <
  -3   2  21    19.58   -36.40   131.40     44 <
  -3   2  22    34.97    39.40   127.20     44 <
  -2  -4 -31     1.63    63.80   124.00     44 <
  -2  -4 -30     1.84    16.30   126.50     44 <
  -2  -4 -29     3.28    68.60   122.70     44 <
  -2  -4 -28    21.61   -17.50   121.60     44 <
  -2  -3 -21    16.60     6.90   125.80     44 <
  -2  -3 -20    51.56   -11.70   121.60     44 <
  -2  -2 -12   409.99   239.40   164.40     44 <
  -2  -2 -11   229.98   157.50   157.80     44 <
  -2  -1  -3 15832.00 16047.20   302.70     44 o
  -2   1  12    24.44    55.60   159.90     44 <
  -2   2  19    17.19     9.80   145.60     44 <
  -2   2  20   549.50   949.40   144.40     44 o
  -1  -3 -24     3.23   -26.80   124.30     44 <
  -1  -3 -23    17.00    -0.60   112.10     44 <
  -1  -3 -22    47.43   -13.20   124.70     44 <
  -1  -2 -14    45.94    -4.80   133.20     44 <
  -1   1  10    89.08   194.10   224.10     44 <
  -1   2  17    43.94    26.20   149.60     44 <
  -1   3  24     2.09    78.20   128.30     44 <
   0  -3 -26    37.54    -2.10   129.80     44 <
   0  -3 -25     6.66    51.00   128.20     44 <
   0  -3 -24    36.63   -15.70   130.00     44 <
   0  -2 -17    50.65    24.00   151.50     44 <
   0  -2 -16   324.58   321.20   139.90     44 <
   0  -1  -8  1342.50  2188.60   245.60     44 o
   0   1   8  1494.20  1065.30   354.30     44 o
   0   2  15    65.59   -35.20   148.30     44 <
   0   3  22    76.63    -0.10   112.10     44 <
   0   3  23    15.81   -26.80   125.80     44 <
   1  -3 -29     1.74    -9.70   121.80     44 <
   1  -3 -28     0.23     8.20   126.20     44 <
   1  -3 -27     2.79   -26.60   120.50     44 <
   1  -2 -20    17.34    59.90   125.30     44 <
   1  -2 -19     9.76    -2.50   112.10     44 <
   1  -1 -11    41.52    47.20   156.40     44 <
   1  -1 -10    72.76   124.10   174.10     44 <
   1   2  13    64.79    75.10   152.20     44 <
   1   3  20    21.14   -16.70   126.40     44 <
   2  -3 -30     0.20   -18.20   125.10     44 <
   2  -2 -23    46.86    -8.60   123.10     44 <
   2  -2 -22     1.57    -7.00   130.00     44 <
   2  -2 -21    61.06    73.30   145.20     44 <
   2  -1 -13    41.90     1.20   130.10     44 <
   2   0  -5  6634.80  6894.80   346.90     44 o
   2   1   3 14074.00 14320.00   289.50     44 o
   2   2  10   685.18   889.80   148.50     44 o
   2   2  11   228.36    53.60   164.60     44 <
   2   3  17   423.66   930.70   139.60     44 o
   2   3  18     1.88    -2.00   138.50     44 <
   2   4  24    56.69   -11.90   125.60     44 <
   2   4  25     1.32    -0.20   124.00     44 <
   3  -2 -26     6.75    45.10   122.90     44 <
   3  -2 -25     9.38    -3.20   112.10     44 <
   3  -2 -24     0.53    23.00   126.20     44 <
   3  -1 -16     4.06     5.40   129.10     44 <
   3  -1 -15     9.81   -19.30   141.30     44 <
   3   0  -8   607.91  1711.10   189.90     44 o
   3   0  -7  2427.20  2404.70   189.90     44 o
   3   1   1  3965.00  3505.60   192.60     44 o
   3   2   8   453.13   720.70   164.40     44 o
   3   3  15    15.74    66.60   135.20     44 <
   3   3  16    21.95    97.70   136.80     44 <
   3   4  22    12.96   -13.70   124.30     44 <
   3   4  23     8.20    38.00   122.60     44 <
   4  -2 -29     0.17   -13.30   123.80     44 <
   4  -2 -28     1.57    34.40   121.40     44 <
   4  -2 -27     0.52    -3.20   125.80     44 <
   4  -2 -26     2.83    41.50   125.50     44 <
   4  -1 -19    20.57   -22.40   124.80     44 <
   4  -1 -18     3.65    -7.60   112.10     44 <
   4   0 -11    12.44    28.90   129.60     44 <
   4   0 -10   136.93    79.00   135.50     44 <
   4   1  -2   560.87   686.40   173.20     44 o
   4   2   6    42.95    72.40   136.20     44 <
   4   3  13   111.66    85.60   136.40     44 <
   4   3  14    10.47    20.40   136.20     44 <
   4   4  20    38.68   119.20   127.40     44 <
   4   4  21     7.93     2.80   128.20     44 <
   5  -1 -23    12.61    24.50   127.50     44 <
   5  -1 -22    10.37   -13.10   120.30     44 <
   5  -1 -21     3.40     3.30   121.60     44 <
   5   0 -14    15.36    -5.20   143.80     44 <
   5   0 -13     3.21    -2.20   127.40     44 <
   5   0 -12    78.65   -24.50   131.00     44 <
   5   1  -5   361.38   579.70   158.10     44 o
   5   1  -4    95.08    14.40   140.30     44 <
   5   2   3    16.09   -32.40   158.00     44 <
   5   2   4   755.99   790.60   161.10     44 o
   5   3  10    19.45   -23.90   132.40     44 <
   5   3  11   117.03   113.00   148.30     44 <
   5   4  17     1.50   -22.00   127.80     44 <
   5   4  18     6.38   -16.60   125.30     44 <
   5   4  19    34.09    28.70   121.70     44 <
   5   5  24    24.20   -22.10   120.60     44 <
   5   5  25     0.95    -9.90   125.00     44 <
   6  -1 -26     1.04    -4.10   122.00     44 <
   6  -1 -25     0.32   -17.50   122.50     44 <
   6  -1 -24     0.24   -13.80   112.10     44 <
   6  -1 -23     0.92   -23.20   119.10     44 <
   6   0 -17     2.80   -22.10   125.10     44 <
   6   0 -16     7.69   -19.30   125.30     44 <
   6   0 -15     2.07   -10.40   123.80     44 <
   6   1  -8     3.89    15.30   139.20     44 <
   6   1  -7   274.74   638.90   144.50     44 o
   6   2   0    60.23     3.70   133.30     44 <
   6   2   1    55.98   -11.70   132.70     44 <
   6   3   8     1.99   -26.10   134.70     44 <
   6   3   9    11.60   -28.80   122.40     44 <
   6   4  15     3.59    46.20   129.10     44 <
   6   4  16     4.55    20.60   127.40     44 <
   6   5  22     3.90    -1.90   128.40     44 <
   6   5  23     0.46    21.90   122.80     44 <
   7   0 -20     1.94    -2.70   122.40     44 <
   7   0 -19     3.70   -17.60   125.40     44 <
   7   0 -18     7.37    -6.50   121.70     44 <
   7   1 -11     6.42    -1.60   112.10     44 <
   7   1 -10    10.88    13.90   130.60     44 <
   7   2  -3    13.72    23.80   129.50     44 <
   7   2  -2    12.57    31.50   133.80     44 <
   7   3   5    11.21    -3.10   124.30     44 <
   7   3   6    26.48   -31.60   125.40     44 <
   7   4  12    10.60   121.30   131.90     44 <
   7   4  13     9.61   -17.80   129.50     44 <
   7   4  14    19.15   -24.70   125.60     44 <
   7   5  19     1.29    -4.80   112.10     44 <
   7   5  20     2.72    25.80   122.90     44 <
   7   5  21     3.24   -11.80   124.70     44 <
   8   1 -15     0.61    65.30   131.20     44 <
   8   1 -14     3.39    -0.90   112.10     44 <
   8   1 -13     0.65   -19.60   126.80     44 <
   8   1 -12     1.25   -11.60   112.10     44 <
   8   2  -6     1.71    89.20   131.60     44 <
   8   2  -5     3.17    78.30   133.40     44 <
   8   2  -4     2.38    66.60   127.90     44 <
   8   3   2     6.47   -18.90   130.70     44 <
   8   3   3    23.04   -17.40   129.00     44 <
   8   3   4     8.69   -44.10   128.90     44 <
   8   4   9     2.12   -36.90   134.50     44 <
   8   4  10     4.81    -0.80   112.10     44 <
   8   4  11     3.54    15.80   132.90     44 <
   8   5  17     0.14   -49.60   131.80     44 <
  -8   0  14     0.80   -47.80   124.40     45 <
  -7  -4 -19     4.96   -29.40   125.50     45 <
  -7  -4 -18     5.60   -19.10   128.20     45 <
  -7  -4 -17     3.50    -5.30   122.70     45 <
  -7  -3 -11     7.05   -31.90   127.80     45 <
  -7  -3 -10     4.50     9.80   123.20     45 <
  -7  -3  -9     6.08     3.20   128.10     45 <
  -7  -2  -3    18.76   -24.60   130.80     45 <
  -7  -2  -2     9.85   114.10   130.40     45 <
  -7  -1   4     1.64   -18.50   126.10     45 <
  -7  -1   5     9.22   -35.20   125.00     45 <
  -7   0  11    13.62   -26.60   131.20     45 <
  -7   0  12    50.16   -33.70   126.30     45 <
  -7   1  18     5.37     8.30   128.20     45 <
  -7   1  19     2.74    25.60   131.70     45 <
  -6  -4 -21     0.32    46.90   126.20     45 <
  -6  -4 -20    16.60    -3.50   123.40     45 <
  -6  -4 -19     1.34    60.40   124.10     45 <
  -6  -3 -12     2.97   -14.10   124.80     45 <
  -6  -3 -11     6.05   -30.60   125.00     45 <
  -6  -2  -4    94.18   106.10   135.30     45 <
  -6  -1   3     8.35    94.80   130.40     45 <
  -6  -1   4    15.47    15.10   136.90     45 <
  -6   0  10    98.36    -2.50   112.10     45 <
  -6   0  11    60.04    83.90   135.00     45 <
  -6   1  16     1.18    67.90   131.70     45 <
  -6   1  17     4.75    21.70   122.40     45 <
  -6   1  18     5.17    -1.30   122.90     45 <
  -6   2  23     8.14    13.50   130.30     45 <
  -5  -4 -22     6.85   -23.40   123.00     45 <
  -5  -4 -21     1.03    28.80   125.80     45 <
  -5  -4 -20    27.81    64.70   124.20     45 <
  -5  -3 -14    27.94    88.30   122.20     45 <
  -5  -3 -13     6.17     9.60   139.10     45 <
  -5  -2  -6   438.66   602.80   149.80     45 o
  -5  -2  -5   538.93   619.60   149.80     45 o
  -5  -1   1   259.97    66.00   130.40     45 <
  -5  -1   2    48.68    -5.00   112.10     45 <
  -5   0   8  1544.20  1386.90   166.80     45 o
  -5   0   9   582.20   655.40   178.10     45 o
  -5   1  15    11.47    51.40   126.60     45 <
  -5   1  16     1.94    13.50   129.40     45 <
  -5   2  22     1.87   -15.30   122.20     45 <
  -5   2  23     4.84   -17.80   121.50     45 <
  -4  -4 -24     1.03    35.70   125.60     45 <
  -4  -4 -23    11.53    31.60   120.90     45 <
  -4  -4 -22     1.67    14.60   118.00     45 <
  -4  -3 -16   164.73   181.20   126.70     45 <
  -4  -3 -15    16.92    36.50   130.70     45 <
  -4  -2  -8    39.41   115.20   131.20     45 <
  -4  -2  -7    72.28    -4.50   127.90     45 <
  -4   0   7     9.76    68.30   147.80     45 <
  -4   1  14    21.67   -14.90   122.90     45 <
  -4   2  20    61.56   -21.00   124.10     45 <
  -4   2  21     6.75    39.40   121.70     45 <
  -3  -4 -26     3.87     0.10   124.60     45 <
  -3  -4 -25     2.45    -9.40   121.90     45 <
  -3  -4 -24     7.72    44.50   122.80     45 <
  -3  -3 -18    18.39    49.00   123.10     45 <
  -3  -3 -17     6.97    -1.20   112.10     45 <
  -3  -2  -9    22.55   -10.80   137.90     45 <
  -3  -1  -2   258.28    74.00   211.40     45 <
  -3   0   5   271.39   793.70   173.10     45 o
  -3   1  12    42.24     8.10   155.90     45 <
  -3   1  13    57.69   -21.80   136.10     45 <
  -3   2  19    89.36    65.10   127.60     45 <
  -3   2  20    84.29    -6.50   125.50     45 <
  -2  -4 -28    17.31    27.10   121.40     45 <
  -2  -4 -27    12.01    13.40   120.70     45 <
  -2  -4 -26     1.17    28.10   124.00     45 <
  -2  -3 -20    51.65     1.80   121.60     45 <
  -2  -3 -19    38.19    41.00   124.20     45 <
  -2  -3 -18     3.24    20.70   125.30     45 <
  -2  -2 -11   136.62    47.40   160.60     45 <
  -2   0   4  9310.90  8389.00   291.70     45 o
  -2   1  11   307.33   155.30   150.40     45 <
  -2   2  17    22.63    33.70   130.10     45 <
  -2   2  18    57.96   -21.60   122.10     45 <
  -2   3  24     4.41   -13.90   119.40     45 <
  -1  -4 -30     2.06    12.30   121.80     45 <
  -1  -4 -29     0.36     5.30   124.40     45 <
  -1  -4 -28     2.49    46.90   120.10     45 <
  -1  -3 -22    52.42   -15.30   123.30     45 <
  -1  -3 -21     8.33     4.30   123.80     45 <
  -1  -3 -20    19.58    39.50   124.50     45 <
  -1  -2 -13    59.34     2.80   148.80     45 <
  -1   0   2 18818.00 17131.90   351.10     45 o
  -1   1   9  3520.80  4142.20   199.60     45 o
  -1   2  16   373.22   395.40   133.10     45 <
  -1   3  22    57.29   -15.80   125.50     45 <
  -1   3  23    10.49    -2.10   124.90     45 <
   0  -4 -30     0.62   -10.40   124.40     45 <
   0  -3 -24    32.05     1.90   124.70     45 <
   0  -3 -23    18.93    92.60   128.80     45 <
   0  -2 -15    55.31    -6.80   112.10     45 <
   0   1   7 13542.00 14078.50   313.40     45 o
   0   2  14    63.58     9.00   130.10     45 <
   0   3  20    66.24    48.70   124.00     45 <
   0   3  21   116.83   -12.00   123.90     45 <
   1  -3 -26     1.22    -3.30   116.00     45 <
   1  -3 -25     2.97     7.40   123.10     45 <
   1  -2 -18    64.68   -11.40   124.70     45 <
   1  -2 -17    31.30    11.30   140.50     45 <
   1  -1  -9  3971.00  3976.20   202.60     45 o
   1   0  -2 18493.00 19240.30   348.70     45 o
   1   1   5  6347.40  6072.90   285.10     45 o
   1   2  12   668.96   428.30   145.40     45 <
   1   3  19    34.97   -11.90   120.10     45 <
   2  -3 -29     0.11    -8.30   117.80     45 <
   2  -3 -28     6.02   -18.00   117.90     45 <
   2  -3 -27    17.52    -6.30   115.90     45 <
   2  -2 -20   461.04   540.30   135.60     45 o
   2  -2 -19     8.89    33.40   136.50     45 <
   2  -1 -12    22.75   -13.70   145.30     45 <
   2  -1 -11   358.11   412.90   141.30     45 <
   2   0  -4  8863.90  9441.70   273.10     45 o
   2   1   3 13808.00 14552.30   294.60     45 o
   2   2  10   201.88   240.20   140.80     45 <
   2   3  17   365.50   309.70   148.40     45 <
   2   4  23    10.59    13.40   118.90     45 <
   2   4  24    45.48     1.00   112.10     45 <
   3  -3 -30     0.58     1.40   118.20     45 <
   3  -3 -29     1.49    -9.10   119.90     45 <
   3  -2 -23     4.01    59.80   123.00     45 <
   3  -2 -22    26.04     0.80   112.10     45 <
   3  -2 -21    16.34   -14.50   121.80     45 <
   3  -1 -14   328.47   238.60   129.50     45 <
   3   0  -6    51.15    96.50   191.10     45 <
   3   1   1  3152.80  3191.80   184.50     45 o
   3   2   8   503.88   478.50   148.00     45 o
   3   3  15    16.59   -12.00   127.50     45 <
   3   4  21     9.82    -7.90   116.50     45 <
   3   4  22     6.49    33.00   124.80     45 <
   4  -2 -25     2.09    46.20   119.40     45 <
   4  -2 -24     4.87    -0.20   112.10     45 <
   4  -2 -23    13.75     2.10   122.40     45 <
   4  -1 -17    47.63    79.10   124.30     45 <
   4  -1 -16    11.39    -6.80   122.50     45 <
   4   0  -9   145.90    -3.00   138.00     45 <
   4   0  -8   656.45   496.90   134.20     45 o
   4   1  -1   304.02   112.50   153.10     45 <
   4   2   6    42.24    -8.70   125.10     45 <
   4   3  13    79.33     2.30   128.10     45 <
   4   4  19    10.23    58.40   124.70     45 <
   4   4  20    12.66    89.90   127.20     45 <
   4   5  25     9.04    -8.70   116.70     45 <
   5  -2 -28     5.72   -10.70   117.70     45 <
   5  -2 -27     1.81   -12.20   120.80     45 <
   5  -2 -26     7.27   -11.00   118.40     45 <
   5  -1 -19    25.58   -11.40   118.70     45 <
   5  -1 -18    27.06    -0.40   112.10     45 <
   5   0 -11   128.60    83.80   136.10     45 <
   5   0 -10   247.49   456.10   152.50     45 <
   5   1  -4    84.78     8.90   128.60     45 <
   5   1  -3    30.96    57.00   128.20     45 <
   5   2   4   628.04   646.20   149.20     45 o
   5   3  11   134.78    21.60   139.40     45 <
   5   4  17     5.57    -9.90   120.20     45 <
   5   4  18    11.34    20.80   123.40     45 <
   5   5  24    21.61    -5.70   118.70     45 <
   5   5  25     1.14   -13.30   121.20     45 <
   6  -1 -22     0.52    50.50   123.20     45 <
   6  -1 -21     2.83    39.90   123.90     45 <
   6  -1 -20     0.52   -17.50   117.20     45 <
   6   0 -14    25.38    -9.00   122.20     45 <
   6   0 -13    63.06    83.60   121.50     45 <
   6   0 -12    40.84   -13.20   119.10     45 <
   6   1  -6    44.33    36.20   140.90     45 <
   6   1  -5    73.09   103.10   126.80     45 <
   6   2   1    36.22    -7.60   123.20     45 <
   6   2   2     3.87   -10.80   123.90     45 <
   6   3   8     1.24   -19.40   125.30     45 <
   6   3   9     9.60    26.50   123.10     45 <
   6   4  15     1.38   -11.90   124.30     45 <
   6   4  16     3.32    71.30   122.70     45 <
   6   5  21     0.24     3.90   121.20     45 <
   6   5  22     5.01    -3.80   112.10     45 <
   6   5  23     0.33    -3.80   112.10     45 <
   7  -1 -23     2.09    13.50   123.30     45 <
   7   0 -17     2.57    45.20   123.50     45 <
   7   0 -16     6.64    33.10   124.40     45 <
   7   0 -15    21.50    -6.40   120.40     45 <
   7   1  -9    28.78    16.00   125.10     45 <
   7   1  -8     1.14   -19.80   118.20     45 <
   7   1  -7     9.71   -11.20   119.20     45 <
   7   2  -1    24.74   -10.50   122.40     45 <
   7   3   6    23.52    65.30   125.30     45 <
   7   3   7     1.50     0.60   116.90     45 <
   7   4  13     6.89   -21.90   120.00     45 <
   7   4  14    16.53   -11.90   122.30     45 <
   7   5  19     0.90    11.50   126.80     45 <
   7   5  20     1.17    -8.00   112.10     45 <
   7   5  21     4.35    30.70   124.80     45 <
   8   0 -18    18.78    24.70   123.60     45 <
   8   0 -17     1.73    14.10   119.90     45 <
   8   1 -11     2.09   -13.70   125.20     45 <
   8   1 -10     0.86   -38.20   127.20     45 <
   8   2  -4     4.57    39.50   127.20     45 <
   8   2  -3     2.47    15.90   125.00     45 <
   8   2  -2     0.91    48.80   125.20     45 <
   8   3   4     7.13    -2.00   121.60     45 <
   8   3   5     3.08    33.80   124.80     45 <
   8   4  10     4.14    -6.00   127.40     45 <
   8   4  11     1.79   -25.80   129.00     45 <
   8   4  12     0.29   -28.50   129.20     45 <
   8   5  17     0.24     7.20   127.10     45 <
  -8   1  16     9.73    14.30   131.70     46 <
  -8   1  17    13.59   -18.80   135.40     46 <
  -8   1  18     0.82    78.70   135.40     46 <
  -7  -4 -20     5.12    64.00   129.10     46 <
  -7  -4 -19     8.03    32.50   136.30     46 <
  -7  -4 -18     4.90   -31.70   124.60     46 <
  -7  -3 -12    18.14    30.30   126.10     46 <
  -7  -3 -11     7.90    -0.00   112.10     46 <
  -7  -2  -5    13.32    78.60   132.80     46 <
  -7  -2  -4    15.52   103.80   132.20     46 <
  -7  -2  -3    21.42   -18.30   130.80     46 <
  -7  -1   2    12.16   119.70   143.60     46 <
  -7  -1   3     3.84     0.20   112.10     46 <
  -7   0   9    56.25   -20.80   130.30     46 <
  -7   0  10    10.95    43.10   133.50     46 <
  -7   1  15     3.27   -19.20   133.40     46 <
  -7   1  16     2.26   -37.20   130.00     46 <
  -7   1  17     4.82   120.00   128.30     46 <
  -7   2  22     3.04   -34.10   130.80     46 <
  -6  -4 -21     0.62    -1.90   126.90     46 <
  -6  -4 -20    15.29    80.60   129.60     46 <
  -6  -4 -19     1.10   -11.90   127.80     46 <
  -6  -3 -13     1.43   -33.00   128.50     46 <
  -6  -3 -12     1.16    17.50   132.70     46 <
  -6  -2  -6    33.88    78.90   139.00     46 <
  -6  -2  -5   103.51   195.60   142.90     46 <
  -6  -1   1   160.04   187.80   138.70     46 <
  -6  -1   2    14.16   -12.00   135.40     46 <
  -6   0   8   133.55   174.40   132.10     46 <
  -6   0   9    61.81    12.70   144.40     46 <
  -6   1  14     3.83   -20.70   124.80     46 <
  -6   1  15     5.37    -6.40   112.10     46 <
  -6   2  21     1.27   -17.80   124.80     46 <
  -6   2  22     2.51    -1.60   123.80     46 <
  -5  -4 -22     4.64   -21.80   125.20     46 <
  -5  -4 -21     0.44    44.10   126.00     46 <
  -5  -3 -14    24.50    68.80   131.50     46 <
  -5  -3 -13    10.11   -22.80   145.10     46 <
  -5  -2  -7    41.85    31.40   141.20     46 <
  -5  -2  -6   492.43   526.60   154.40     46 o
  -5  -1   0     8.94    18.00   149.00     46 <
  -5  -1   1   252.40   436.80   137.60     46 o
  -5   0   7    11.58    46.20   170.70     46 <
  -5   1  13    42.37    20.20   140.40     46 <
  -5   1  14    80.98    98.80   131.40     46 <
  -5   2  20    37.64    23.50   129.10     46 <
  -5   2  21     3.78    68.60   124.00     46 <
  -4  -4 -24     0.74    31.00   126.60     46 <
  -4  -4 -23    13.17    60.90   124.30     46 <
  -4  -4 -22     2.84    -9.30   121.30     46 <
  -4  -3 -16   166.73   138.60   129.70     46 <
  -4  -3 -15    13.97    -3.10   112.10     46 <
  -4  -2  -8    42.88   179.90   130.20     46 <
  -4  -1  -1   417.44   199.00   157.50     46 <
  -4   0   6    26.48    -0.20   136.00     46 <
  -4   1  12     6.43    -8.70   130.70     46 <
  -4   1  13    47.11    38.50   124.00     46 <
  -4   2  18    66.18   123.50   128.10     46 <
  -4   2  19    15.88    65.70   125.80     46 <
  -4   3  24     2.43   -24.50   126.70     46 <
  -3  -4 -25     0.70    -8.80   121.80     46 <
  -3  -4 -24     9.97     5.80   124.80     46 <
  -3  -3 -17     6.80    46.80   135.70     46 <
  -3  -3 -16    30.75   110.80   132.30     46 <
  -3  -2 -10    18.85    51.40   151.30     46 <
  -3  -2  -9    15.74   -35.50   137.80     46 <
  -3  -1  -2   219.31   177.90   158.60     46 <
  -3   1  11   559.61   387.50   156.90     46 <
  -3   2  17    31.97   -17.50   143.00     46 <
  -3   2  18     6.77   -15.10   127.20     46 <
  -3   3  23     2.17   -18.70   124.20     46 <
  -3   3  24    16.99    18.80   123.00     46 <
  -2  -4 -27    12.99   -11.70   123.60     46 <
  -2  -4 -26     0.59    31.50   119.80     46 <
  -2  -4 -25     0.96   -23.10   121.10     46 <
  -2  -3 -19    26.58    79.10   124.30     46 <
  -2  -3 -18     2.67   -11.90   141.40     46 <
  -2  -2 -11   212.63    -6.20   143.00     46 <
  -2  -1  -4   613.18   152.50   217.20     46 <
  -2   0   3  1440.20   592.70   257.40     46 <
  -2   1  10   443.39   373.20   172.00     46 <
  -2   2  16    56.83    34.60   140.30     46 <
  -2   3  22     5.96    -2.20   127.60     46 <
  -2   3  23    25.97   -23.10   123.80     46 <
  -1  -4 -29     1.00    49.80   120.70     46 <
  -1  -4 -28     3.19    46.30   121.80     46 <
  -1  -4 -27     0.39    10.10   120.40     46 <
  -1  -3 -21     6.21    56.10   124.80     46 <
  -1  -3 -20    15.02   -15.80   126.80     46 <
  -1  -2 -13    67.63    -1.80   147.40     46 <
  -1   1   8    25.38    29.30   231.00     46 <
  -1   2  15    83.81   -14.00   141.00     46 <
  -1   3  21     4.89    56.30   123.90     46 <
   0  -4 -30     0.21    25.80   124.90     46 <
   0  -4 -29     1.41   -15.40   122.60     46 <
   0  -3 -22    64.09    40.60   123.30     46 <
   0  -3 -21   132.36   -16.30   130.60     46 <
   0  -2 -14    66.85     6.30   132.60     46 <
   0  -1  -7 13282.00 13380.40   304.50     46 o
   0   1   7 14220.00 15109.70   331.40     46 o
   0   2  13    52.73    48.70   141.70     46 <
   0   3  19    50.62    39.20   123.40     46 <
   0   3  20    57.91    25.10   131.80     46 <
   1  -3 -24     3.48    -8.10   121.10     46 <
   1  -3 -23    10.64     0.30   126.10     46 <
   1  -2 -16   346.52   205.00   137.60     46 <
   1  -1  -9  4047.70  3887.60   205.70     46 o
   1   1   5  6053.80  5837.70   270.50     46 o
   1   2  12   756.54   571.60   154.90     46 o
   1   3  18     8.80   -19.40   125.20     46 <
   1   4  24     0.80    24.30   126.20     46 <
   2  -3 -26    25.27   -12.60   124.60     46 <
   2  -3 -25     1.54     1.30   120.90     46 <
   2  -2 -18    73.97   133.60   125.90     46 <
   2  -2 -17    27.74    -5.60   126.00     46 <
   2  -1 -11   437.47   504.90   157.10     46 o
   2  -1 -10   481.84   394.70   156.00     46 <
   2   2  10   496.11   660.80   158.90     46 o
   2   3  16   660.71   498.30   148.20     46 o
   2   3  17   344.71   254.60   147.50     46 <
   2   4  22    44.76     3.40   127.00     46 <
   2   4  23     9.72     8.60   129.20     46 <
   3  -3 -29     2.21    68.40   127.40     46 <
   3  -3 -28     1.48     5.10   124.30     46 <
   3  -3 -27     4.12   -12.90   120.80     46 <
   3  -2 -20    85.05    64.20   123.40     46 <
   3  -2 -19   105.63   -11.80   123.50     46 <
   3  -1 -13    92.48   -15.80   141.00     46 <
   3  -1 -12    49.37    33.80   156.30     46 <
   3   0  -5   259.22   728.70   190.90     46 o
   3   1   2   188.92   125.80   209.70     46 <
   3   2   8   505.40   512.70   146.70     46 o
   3   2   9    14.74     0.60   140.10     46 <
   3   3  15    13.16    -1.60   129.40     46 <
   3   4  21    17.69   -20.20   124.30     46 <
   3   4  22     9.83     0.20   112.10     46 <
   4  -3 -29     0.29    30.10   119.90     46 <
   4  -2 -23    22.62     0.20   123.00     46 <
   4  -2 -22     3.17    83.10   125.20     46 <
   4  -2 -21     6.39   -18.70   119.60     46 <
   4  -1 -15    49.44    86.50   126.20     46 <
   4  -1 -14    25.11   -18.50   129.80     46 <
   4   0  -7    13.32   -11.10   144.90     46 <
   4   2   7    83.88     5.50   130.90     46 <
   4   3  13    98.26     0.70   132.60     46 <
   4   3  14    22.29    60.30   123.50     46 <
   4   4  19    10.66     8.20   127.80     46 <
   4   4  20    32.91    36.00   125.50     46 <
   4   5  25    10.46    60.30   121.70     46 <
   5  -2 -25    11.94    -7.60   123.40     46 <
   5  -2 -24     0.42    -4.00   120.80     46 <
   5  -2 -23     5.40    46.90   125.90     46 <
   5  -1 -17     6.61    59.80   123.30     46 <
   5  -1 -16     2.20    51.30   123.90     46 <
   5   0  -9   571.77   712.80   183.40     46 o
   5   1  -2    32.09    28.10   136.60     46 <
   5   2   5   470.99   418.80   169.40     46 <
   5   3  11   122.69    14.70   138.40     46 <
   5   3  12   291.22   383.90   140.20     46 <
   5   4  18     7.01   -18.10   124.40     46 <
   5   4  19    36.05    73.40   122.80     46 <
   5   5  24    20.32    16.60   122.30     46 <
   5   5  25     1.15    70.60   121.50     46 <
   6  -2 -26     0.25   -12.00   119.50     46 <
   6  -2 -25     1.82     0.60   112.10     46 <
   6  -1 -19     2.35    -2.50   112.10     46 <
   6  -1 -18     6.85    -3.70   119.70     46 <
   6   0 -11    57.08     7.80   131.30     46 <
   6   0 -10   107.08   118.40   126.10     46 <
   6   1  -4    19.53   -21.10   128.90     46 <
   6   1  -3     2.51   -24.10   124.10     46 <
   6   2   3     5.35   -19.20   129.40     46 <
   6   2   4    79.98    19.90   140.60     46 <
   6   3   9     9.21    76.00   125.20     46 <
   6   3  10     4.24   -21.60   130.90     46 <
   6   4  16     4.35   -17.00   125.60     46 <
   6   4  17     2.49    86.90   124.90     46 <
   6   5  22     3.74   -16.60   123.60     46 <
   6   5  23     0.40   -29.60   125.60     46 <
   7  -1 -21     3.12    -9.60   124.80     46 <
   7  -1 -20     0.88    17.10   119.90     46 <
   7  -1 -19     3.27   -13.90   124.00     46 <
   7   0 -14     1.03   -19.50   125.70     46 <
   7   0 -13     6.90    18.40   127.30     46 <
   7   0 -12    58.39    35.10   121.40     46 <
   7   1  -6     6.71   -13.80   124.00     46 <
   7   1  -5     8.91    83.10   123.30     46 <
   7   2   1    32.62    15.40   123.40     46 <
   7   2   2    22.80    -3.90   124.60     46 <
   7   3   7     3.36    41.30   129.00     46 <
   7   3   8    12.92    -6.60   127.30     46 <
   7   4  14    14.94   -18.10   123.00     46 <
   7   4  15     5.14    40.30   126.80     46 <
   7   5  20     1.22     3.50   127.70     46 <
   7   5  21     2.01   -16.00   124.40     46 <
   7   5  22    40.27    59.30   126.20     46 <
   8   0 -16     0.89   131.40   130.20     46 <
   8   0 -15    14.35    -8.80   123.80     46 <
   8   0 -14     0.90   -36.30   124.60     46 <
   8   1  -9     8.25   -28.80   125.40     46 <
   8   1  -8     2.44     6.30   128.10     46 <
   8   1  -7     1.68   -18.60   128.00     46 <
   8   2  -2     1.91   -33.80   127.10     46 <
   8   2  -1     2.43   -16.50   126.70     46 <
   8   2   0    43.99   -10.30   131.80     46 <
   8   3   5     3.67   -29.70   125.00     46 <
   8   3   6    18.02   -30.60   130.00     46 <
   8   3   7    25.29    58.50   128.50     46 <
   8   4  12     2.23    55.00   128.70     46 <
   8   4  13     1.73    28.70   131.20     46 <
  -8   1  14     2.38    58.70   135.30     47 <
  -8   1  15     0.11   -47.70   133.90     47 <
  -7  -4 -20     4.77   -20.00   131.30     47 <
  -7  -4 -19     5.67   -43.60   129.20     47 <
  -7  -4 -18     4.43    29.50   133.00     47 <
  -7  -3 -13     3.92    32.30   127.60     47 <
  -7  -3 -12    14.74   -29.80   129.50     47 <
  -7  -2  -6    28.50   -46.70   128.50     47 <
  -7  -2  -5    16.82    -3.60   112.10     47 <
  -7  -1   1   119.87    90.70   131.60     47 <
  -7  -1   2     7.01    -1.30   127.50     47 <
  -7   0   7    30.23   -30.40   134.70     47 <
  -7   0   8     1.95     0.70   125.60     47 <
  -7   1  13     1.88   147.50   134.80     47 <
  -7   1  14     9.54   -21.90   134.20     47 <
  -7   2  19    17.47    -7.10   129.20     47 <
  -7   2  20     8.03    11.80   128.00     47 <
  -7   2  21     6.02     1.30   129.20     47 <
  -6  -4 -21     0.25   -17.50   129.10     47 <
  -6  -4 -20    12.82    68.60   128.00     47 <
  -6  -3 -14     1.16    13.40   123.40     47 <
  -6  -3 -13     1.70   -21.80   120.10     47 <
  -6  -2  -7    13.10    13.80   135.00     47 <
  -6  -2  -6    29.93   111.30   141.20     47 <
  -6  -1   1   185.12   319.20   135.70     47 <
  -6   0   6    15.83   182.60   129.90     47 <
  -6   0   7    45.78    24.10   143.00     47 <
  -6   1  12     0.63     1.10   125.20     47 <
  -6   1  13     4.90    68.60   124.60     47 <
  -6   2  18     0.68   -22.50   125.10     47 <
  -6   2  19     2.05    19.10   125.40     47 <
  -6   2  20     1.11    29.10   127.80     47 <
  -5  -4 -22     7.15    -0.20   120.30     47 <
  -5  -4 -21     1.05    60.50   124.60     47 <
  -5  -3 -15    27.17    -1.40   129.10     47 <
  -5  -3 -14    23.59   -13.60   125.30     47 <
  -5  -2  -8     4.54    -9.00   137.00     47 <
  -5  -2  -7    53.56    -0.60   141.50     47 <
  -5  -1  -1   196.18    81.70   130.50     47 <
  -5   0   5    84.00   -18.20   145.50     47 <
  -5   0   6   130.01   128.40   129.00     47 <
  -5   1  12    62.61   163.60   133.10     47 <
  -5   2  18    13.60   -26.00   125.10     47 <
  -5   2  19    46.31    11.10   126.10     47 <
  -5   3  23    13.07   -10.30   124.80     47 <
  -4  -5 -29     2.47    50.60   123.90     47 <
  -4  -4 -23    12.40   -15.50   124.60     47 <
  -4  -4 -22     4.02    37.70   125.00     47 <
  -4  -3 -16   148.22   260.80   134.70     47 <
  -4  -3 -15    18.37     0.60   125.90     47 <
  -4  -2  -9    38.36    15.50   136.80     47 <
  -4  -2  -8    41.78    87.90   133.20     47 <
  -4  -1  -2   405.30   580.30   167.60     47 o
  -4   0   5    46.23    47.90   139.30     47 <
  -4   1  11    26.42    42.90   132.20     47 <
  -4   2  17    13.07    26.90   126.60     47 <
  -4   3  23     1.53   -28.70   131.70     47 <
  -4   3  24     2.16    47.80   127.50     47 <
  -3  -5 -30     1.15    95.80   123.60     47 <
  -3  -4 -25     2.38     5.60   118.90     47 <
  -3  -4 -24     6.38    -6.20   120.90     47 <
  -3  -4 -23     7.79   -11.10   112.10     47 <
  -3  -3 -17     9.00    25.40   131.90     47 <
  -3  -3 -16    35.34    64.40   124.60     47 <
  -3  -2 -10    19.31    89.90   153.60     47 <
  -3  -1  -3    47.05    -2.00   145.30     47 <
  -3   0   4   650.14   893.30   174.70     47 o
  -3   1  10   229.20   224.70   176.70     47 <
  -3   2  16   363.54   366.20   142.80     47 <
  -3   3  22    24.88   -24.90   128.50     47 <
  -2  -4 -26     0.59    59.30   121.10     47 <
  -2  -4 -25     0.31   -22.90   122.10     47 <
  -2  -4 -24    54.72   -21.10   122.90     47 <
  -2  -3 -18     3.28     1.90   138.90     47 <
  -2  -2 -11   168.29    82.60   148.70     47 <
  -2  -1  -4   606.59   477.30   218.60     47 <
  -2   1   9   481.94   517.60   168.30     47 o
  -2   2  15   186.93   139.90   145.10     47 <
  -2   3  21     9.75   -19.10   126.70     47 <
  -1  -4 -27     0.52    13.80   123.70     47 <
  -1  -4 -26     1.24   -17.90   121.90     47 <
  -1  -3 -20    17.22     4.70   127.20     47 <
  -1  -3 -19    40.89   -33.00   122.30     47 <
  -1  -2 -12   679.22   682.70   157.60     47 o
  -1   2  14    72.41    26.60   136.20     47 <
  -1   3  20    11.70    70.90   126.20     47 <
   0  -4 -29     0.44   -19.10   119.20     47 <
   0  -4 -28     6.07    59.60   127.80     47 <
   0  -4 -27     9.48   -25.00   121.60     47 <
   0  -3 -21   116.61    36.90   124.10     47 <
   0  -3 -20    59.52    29.30   131.00     47 <
   0  -2 -14    91.90   -21.20   131.10     47 <
   0  -2 -13    91.15    57.20   143.00     47 <
   0   2  13    88.57   -38.30   173.50     47 <
   0   3  19    61.71    -8.50   123.70     47 <
   0   4  24    35.56   -13.80   125.40     47 <
   1  -4 -30     1.60    18.30   123.60     47 <
   1  -4 -29     0.25     2.50   121.20     47 <
   1  -3 -23    13.50     3.20   124.30     47 <
   1  -3 -22    53.34   -22.50   122.90     47 <
   1  -2 -15    57.85    33.30   137.00     47 <
   1  -1  -8    40.63    73.60   214.60     47 <
   1   1   5  5602.60  5455.40   263.70     47 o
   1   2  11   473.27   849.50   167.60     47 o
   1   3  17    33.13    -2.90   123.30     47 <
   1   3  18    10.96    -0.70   127.30     47 <
   1   4  23     3.07    -4.80   118.50     47 <
   1   4  24     1.16    31.20   124.40     47 <
   2  -4 -30     0.46    -5.70   118.20     47 <
   2  -3 -24     6.75   -19.30   121.00     47 <
   2  -3 -23    19.57     0.90   112.10     47 <
   2  -2 -17    27.33    16.40   132.10     47 <
   2  -2 -16    56.41    -7.20   135.20     47 <
   2  -1  -9   523.23   792.00   173.60     47 o
   2   0  -3  1298.20  1370.60   279.70     47 o
   2   1   4   612.70   150.30   226.00     47 <
   2   2  10   246.67   127.20   154.60     47 <
   2   3  16   457.98   282.60   143.70     47 <
   2   4  22    23.72    47.10   126.10     47 <
   2   4  23    11.34    -7.10   122.00     47 <
   3  -3 -26     2.02     0.90   112.10     47 <
   3  -3 -25     4.15   -14.60   121.60     47 <
   3  -3 -24    21.35    10.30   122.20     47 <
   3  -2 -18     6.24    41.70   129.10     47 <
   3  -1 -11   440.80   683.80   150.10     47 o
   3   0  -4   602.80   996.30   177.60     47 o
   3   1   2   306.98   235.50   163.10     47 <
   3   2   9    10.76   -14.30   138.90     47 <
   3   3  15    10.14    -5.00   129.40     47 <
   3   4  21    12.76    -3.70   112.10     47 <
   4  -3 -28     1.15    29.00   119.40     47 <
   4  -3 -27     7.15   -15.20   120.40     47 <
   4  -3 -26     2.10    42.80   120.30     47 <
   4  -2 -20    69.84    29.00   127.60     47 <
   4  -2 -19    11.01     6.20   119.80     47 <
   4  -1 -13    41.40    14.20   125.80     47 <
   4  -1 -12     6.15    11.30   126.60     47 <
   4   0  -6    27.55    59.40   132.10     47 <
   4   1   1   383.59   221.50   157.50     47 <
   4   2   7    98.07   121.40   127.80     47 <
   4   3  13    86.93    -1.40   128.60     47 <
   4   3  14    17.25    13.90   132.30     47 <
   4   4  19    13.75    52.10   125.00     47 <
   4   4  20     7.16     9.90   125.50     47 <
   4   5  25     7.49    35.50   120.70     47 <
   5  -3 -28     0.81    35.70   120.70     47 <
   5  -2 -22     0.84    -0.40   112.10     47 <
   5  -2 -21     2.92    -8.90   122.50     47 <
   5  -2 -20    34.65    50.50   121.40     47 <
   5  -1 -15    15.09    37.30   127.60     47 <
   5  -1 -14    72.79    63.70   123.30     47 <
   5   0  -8  1403.20  1347.60   174.40     47 o
   5   0  -7    11.13   -14.90   161.00     47 <
   5   1  -1   318.91    83.90   135.50     47 <
   5   1   0    16.71     5.30   135.80     47 <
   5   2   6   452.81   531.80   153.10     47 o
   5   3  12   254.58   461.70   143.90     47 o
   5   4  18     8.92    -3.20   112.10     47 <
   5   4  19    23.86    -4.40   121.70     47 <
   5   5  23     5.90     9.20   129.60     47 <
   5   5  24    20.33    72.00   125.20     47 <
   5   5  25     0.92   -12.90   124.70     47 <
   6  -2 -24     0.39   -21.20   122.30     47 <
   6  -2 -23     5.74    33.80   123.50     47 <
   6  -2 -22     2.72     7.40   119.50     47 <
   6  -1 -16     1.01   -21.20   123.20     47 <
   6  -1 -15     4.90   -13.40   123.70     47 <
   6   0  -9    46.63    58.70   133.90     47 <
   6   0  -8   121.76    86.60   128.70     47 <
   6   1  -3     6.49   -12.20   119.40     47 <
   6   1  -2     4.14    -3.10   132.60     47 <
   6   2   4    48.24    83.90   128.00     47 <
   6   2   5   101.74    21.10   132.00     47 <
   6   3  10     3.94    -6.30   123.60     47 <
   6   3  11     4.29    57.50   129.60     47 <
   6   4  16     4.03   -13.70   125.70     47 <
   6   4  17     1.08    73.90   125.60     47 <
   6   5  22     4.88    48.20   124.40     47 <
   6   5  23     0.54   -10.60   112.10     47 <
   7  -1 -18     4.95    -5.80   125.00     47 <
   7  -1 -17     4.17    78.30   123.20     47 <
   7   0 -11     9.59   -20.40   122.10     47 <
   7   0 -10    10.44    -0.30   127.30     47 <
   7   1  -4     4.09    87.10   130.60     47 <
   7   1  -3    10.78    -2.80   127.60     47 <
   7   2   2    17.82    25.70   127.60     47 <
   7   2   3    20.90    11.70   126.60     47 <
   7   3   9     9.58     6.60   127.90     47 <
   7   3  10     2.58    11.00   130.10     47 <
   7   4  15     1.85    44.70   124.00     47 <
   7   4  16    36.55     0.90   112.10     47 <
   7   5  20     1.00    -3.10   126.00     47 <
   7   5  21     3.49    90.30   127.40     47 <
   7   5  22    29.42    37.50   128.30     47 <
   8  -1 -18     0.75   -20.20   124.60     47 <
   8   0 -13     1.75     9.30   125.90     47 <
   8   0 -12     1.84   -25.80   123.10     47 <
   8   1  -6     1.64    -9.30   125.90     47 <
   8   1  -5     5.97    41.00   123.40     47 <
   8   2   0    57.93    41.30   132.00     47 <
   8   2   1     4.18    13.70   125.90     47 <
   8   2   2     1.94   -33.00   122.30     47 <
   8   3   7    21.52    96.70   127.60     47 <
   8   3   8     1.36   -38.40   126.40     47 <
   8   4  13     1.95   -24.40   124.10     47 <
   8   4  14     2.38   109.20   127.30     47 <
  -8   1  12     0.20    -0.20   136.50     48 <
  -8   1  13     1.09    11.50   142.10     48 <
  -8   2  18     0.53    -6.90   138.90     48 <
  -7  -4 -21     0.71    -3.00   112.10     48 <
  -7  -4 -20     5.05   130.20   135.60     48 <
  -7  -4 -19     9.35   -13.50   135.90     48 <
  -7  -3 -14    13.41    96.90   133.50     48 <
  -7  -3 -13     3.56   -29.30   133.70     48 <
  -7  -3 -12    13.40    -2.90   112.10     48 <
  -7  -2  -7    15.35   108.00   133.30     48 <
  -7  -2  -6    21.36     7.30   136.20     48 <
  -7  -1  -1   132.37   201.60   143.70     48 <
  -7  -1   0     7.95   -28.20   147.80     48 <
  -7   0   6    41.50    43.40   136.10     48 <
  -7   1  11     5.60   -22.30   130.80     48 <
  -7   1  12    13.30   -31.80   130.30     48 <
  -7   2  17     5.07    44.20   128.60     48 <
  -7   2  18     1.06   -56.20   131.50     48 <
  -6  -4 -21     0.25     3.50   122.90     48 <
  -6  -4 -20    13.04     5.70   131.90     48 <
  -6  -3 -14     2.50    85.90   128.40     48 <
  -6  -3 -13     1.43    43.80   130.40     48 <
  -6  -2  -8    17.51   -17.40   130.70     48 <
  -6  -2  -7    13.29    62.50   136.70     48 <
  -6  -1  -1   156.58   136.50   145.40     48 <
  -6   0   5    41.54   -15.70   134.00     48 <
  -6   0   6    21.01    56.20   143.60     48 <
  -6   1  11     0.92    -0.30   129.30     48 <
  -6   1  12     0.50    -9.30   130.50     48 <
  -6   2  17     0.94   -20.70   127.70     48 <
  -6   2  18     0.62   -19.60   130.30     48 <
  -6   3  22     1.58    53.40   127.10     48 <
  -6   3  23     0.49    49.80   131.60     48 <
  -5  -5 -27     3.54    15.20   127.20     48 <
  -5  -4 -22     3.19     0.80   112.10     48 <
  -5  -4 -21     1.12    -4.90   127.30     48 <
  -5  -3 -15    27.46   -17.90   131.20     48 <
  -5  -3 -14    17.57   137.60   129.40     48 <
  -5  -2  -8     3.87    24.90   140.40     48 <
  -5  -1  -2    46.06   -10.90   138.00     48 <
  -5  -1  -1   269.32   493.70   141.10     48 o
  -5   0   4   819.74   735.50   157.50     48 o
  -5   0   5    60.97    -3.00   156.10     48 <
  -5   1  10    34.98     9.10   142.40     48 <
  -5   1  11    34.88    29.40   142.60     48 <
  -5   2  16   234.75   277.00   138.10     48 <
  -5   2  17     1.68   -18.90   127.70     48 <
  -5   3  22    71.01   -16.70   131.20     48 <
  -5   3  23    14.33     3.20   124.30     48 <
  -4  -5 -29     2.27    31.60   123.00     48 <
  -4  -5 -28     3.35   -27.30   124.00     48 <
  -4  -4 -23    13.22    -1.80   112.10     48 <
  -4  -4 -22     1.67    24.60   126.30     48 <
  -4  -3 -16   175.68   308.80   134.20     48 <
  -4  -3 -15    14.14    20.20   138.70     48 <
  -4  -2  -9    28.82   146.10   143.40     48 <
  -4  -1  -3   347.50   178.60   152.80     48 <
  -4  -1  -2   444.21   499.80   153.40     48 o
  -4   0   4   226.89   155.60   158.20     48 <
  -4   1  10    60.06   -18.20   135.00     48 <
  -4   2  15     3.51   -37.90   134.40     48 <
  -4   2  16    33.86   102.00   128.10     48 <
  -4   3  21    10.76    34.20   127.50     48 <
  -4   3  22     6.52   -18.90   124.70     48 <
  -3  -5 -30     1.21    -3.30   127.80     48 <
  -3  -5 -29     1.61   118.10   125.10     48 <
  -3  -4 -24     9.41   -24.50   124.20     48 <
  -3  -4 -23     6.91   -19.40   124.30     48 <
  -3  -3 -17     9.70    23.50   135.50     48 <
  -3  -3 -16    21.03   119.70   135.80     48 <
  -3  -2 -10    15.07   -19.70   151.30     48 <
  -3  -1  -3    45.43  -100.00   159.50     48 <
  -3   0   3   279.69   248.10   195.50     48 <
  -3   1   9   667.47   510.20   168.90     48 o
[truncated: 496,521 more chars]
